# Supplementary material
Source: publisher figshare collection journal article supplement (https://acs.figshare.com/ndownloader/files/4933387)
Supplement: Supplementary file 1 [file 4933387]

## Sheet: Supplementary Table S-1
Supplementarty Table S-1. Quantitative results for proteins identified in rat striatal tissues with short- (WD1) or long- (WD22) term cocaine withdrawal.
Protein AC	Entry name	Protein name	Gene name	Length	WD1								WD22
					Peptide #	Control TIC (log2)	SEM	Cocaine TIC (log2)	SEM	Protein Ratio	SEM	p-value	Peptide #	Control TIC (log2)	SEM	Cocaine TIC (log2)	SEM	Ratio	SEM	p-value
A0A096MIZ1	A0A096MIZ1_RAT	Uncharacterized protein	0	376	2	22.2675	0.10793	22.2837	0.125802	1.01132	0.0753748	>0.05	2	21.0981	0.0390687	21.1558	0.0578195	1.04079	0.0433576	>0.05
A0A096MJ42	A0A096MJ42_RAT	Disks large homolog 3	Dlg3	817									12	25.7564	0.157343	25.6237	0.157692	0.912068	0.111434	>0.05
A0A096MJE6	A0A096MJE6_RAT	Tenascin R, isoform CRA_b (Tenascin-R)	Tnr rCG_46283	1358	31	28.6257	0.0565641	28.2755	0.0515123	0.784515	0.0348711	<0.001	26	27.2795	0.0386178	27.15	0.0744061	0.914127	0.0475055	>0.05
A0A096MJM1	A0A096MJM1_RAT	Protein Rhog	Rhog	185	9	25.7307	0.0920363	25.658	0.130589	0.950864	0.106661	>0.05	8	25.1391	0.0515552	25.0323	0.0456305	0.928627	0.0290168	>0.05
A0A096MJM7	A0A096MJM7_RAT	Neuralized-like (Drosophila) (Predicted), isoform CRA_b (Protein Neurl1)	Neurl1 Neurl_predicted rCG_57691	574									2	19.0709	0.221586	19.3534	0.0997676	1.21628	0.09189	>0.05
A0A096MJN4	A0A096MJN4_RAT	Protein Sept4	42251	459	13	24.938	0.0949106	24.89	0.100174	0.967235	0.0609749	>0.05	11	23.5945	0.0458141	23.5924	0.065736	0.998547	0.0448825	>0.05
A0A096MJU2	A0A096MJU2_RAT	Protein Dnhd1	Dnhd1	4770									4	24.4877	0.139451	24.3972	0.119267	0.939166	0.0807934	>0.05
A0A096MJX4	A0A096MJX4_RAT	Protein Fsip2	Fsip2	6942	5	23.1907	0.115901	23.2145	0.14498	1.01661	0.108267	>0.05	7	21.3712	0.203638	21.4325	0.200667	1.04346	0.160212	>0.05
A0A096MJY6	A0A096MJY6_RAT	Protein Gbe1	Gbe1	412	3	21.4024	0.0821631	21.1522	0.0485053	0.840761	0.0279689	<0.05
A0A096MJZ0	A0A096MJZ0_RAT	Protein Dnal1	Dnal1	190	2	20.7115	0.0546718	20.8111	0.0660999	1.07144	0.0460076	>0.05
A0A096MK15	A0A096MK15_RAT	Uncharacterized protein	0	6666	5	18.8605	0.150902	18.9631	0.126666	1.07364	0.0959544	>0.05
A0A097PE04	A0A097PE04_RAT	Cytochrome c oxidase subunit II	COX2	227	11	29.2343	0.0559555	29.191	0.051419	0.970448	0.0361626	>0.05	8	27.7387	0.0371444	27.7064	0.0381541	0.977874	0.0255214	>0.05
A0A0A0MXY9	A0A0A0MXY9_RAT	Aflatoxin B1 aldehyde reductase member 2	Akr7a2	366									3	22.6339	0.100165	22.6529	0.082081	1.01328	0.0569818	>0.05
A0A0A0MY13	A0A0A0MY13_RAT	Probable G-protein-coupled receptor 158	Gpr158	1206									11	23.8821	0.0571656	23.902	0.0751913	1.01389	0.0526772	>0.05
A0JN30	A0JN30_RAT	Canopy 2 homolog (Zebrafish) (Protein Cnpy2) (RCG42492)	Cnpy2 MGC156825 rCG_42492	182	2	22.963	0.221345	23.1962	0.0911881	1.17544	0.0672445	>0.05	2	21.0572	0.0676238	21.1238	0.0798694	1.04725	0.0577953	>0.05
A0JPJ7	OLA1_RAT	Obg-like ATPase 1	Ola1	396	11	25.4146	0.0739951	25.3531	0.0534497	0.95827	0.035202	>0.05	11	24.2691	0.0486922	24.3443	0.0567639	1.05345	0.0401525	>0.05
A1A5L1	A1A5L1_RAT	Bleomycin hydrolase	LOC100911400 Blmh	455	4	23.9169	0.098057	23.9109	0.0728644	0.995859	0.0504098	>0.05
A1A5L2	A1A5L2_RAT	Pgm1 protein (Fragment)	Pgm1	583	19	26.7551	0.0412855	26.7612	0.057464	1.00425	0.0423411	>0.05	18	25.3603	0.0383875	25.3394	0.0191044	0.985602	0.0133912	>0.05
A1A5Q6	SMK_RAT	Sperm motility kinase (EC 2.7.11.1)	Smok	654									2	18.2574	0.248958	18.5856	0.27663	1.25541	0.223614	>0.05
A1L108	ARP5L_RAT	Actin-related protein 2/3 complex subunit 5-like protein (Arp2/3 complex 16 kDa subunit 2) (ARC16-2)	Arpc5l	153	3	25.0653	0.129354	24.9329	0.118867	0.912358	0.0906133	>0.05	3	24.0352	0.0934374	24.18	0.11854	1.10558	0.0867862	>0.05
A1L1J4	A1L1J4_RAT	Protein phosphatase 2C, magnesium dependent, catalytic subunit (Protein phosphatase 2C, magnesium dependent, catalytic subunit, isoform CRA_c) ([Pyruvate dehydrogenase [acetyl-transferring]]-phosphatase 1, mitochondrial)	Pdp1 Ppm2c rCG_54941	538	3	22.0215	0.13354	22.0345	0.090574	1.00908	0.0625157	>0.05	4	20.2811	0.0859883	20.495	0.0784573	1.15981	0.0639062	>0.05
A1L1J8	A1L1J8_RAT	Protein Rab5b (RAB5B, member RAS oncogene family) (RAB5B, member RAS oncogene family (Predicted), isoform CRA_c)	Rab5b Rab5b_predicted rCG_42413	215	5	25.4166	0.142134	25.3383	0.109467	0.94714	0.0772532	>0.05	5	23.5837	0.048488	23.6242	0.0558337	1.02847	0.0406779	>0.05
A1L1L9	A1L1L9_RAT	RGD1563224 protein	Tmem65 RGD1563224	261	3	23.0474	0.0847546	22.8939	0.0626942	0.899045	0.0419478	>0.05
A2RUW1	TOLIP_RAT	Toll-interacting protein	Tollip	274	2	20.7023	0.368832	20.5481	0.298544	0.89867	0.253345	>0.05	5	20.8346	0.165487	20.7116	0.222782	0.918315	0.148022	>0.05
A2VCW8	A2VCW8_RAT	Septin 7	42254	437									17	28.0994	0.0373072	28.0942	0.0177474	0.996431	0.0122633	>0.05
A2VCX1	TIPRL_RAT	TIP41-like protein	Tiprl	271									2	20.3549	0.10668	20.4002	0.127463	1.0319	0.0948713	>0.05
A3FM27	A3FM27_RAT	Mitochondrial chloride intracellular channel 4	Clic4	253	6	24.0371	0.143114	24.1916	0.141105	1.11299	0.115955	>0.05	6	21.9652	0.12263	21.9753	0.0777885	1.00706	0.0525894	>0.05
A4L9P8	CE295_RAT	Centrosomal protein of 295 kDa	Cep295	2395	2	21.7201	0.104258	21.8924	0.0824077	1.1269	0.0644109	>0.05
A7VJC2	ROA2_RAT	Heterogeneous nuclear ribonucleoproteins A2/B1 (hnRNP A2/B1)	Hnrnpa2b1 Hnrnp Hnrpa2b1	353	13	28.2593	0.0505393	28.2427	0.0305547	0.988571	0.0211655	>0.05	14	27.2061	0.0488858	27.2299	0.0502882	1.01663	0.0371874	>0.05
A7XYB9	A7XYB9_RAT	NADH-ubiquinone oxidoreductase chain 4 (EC 1.6.5.3)	Nd4 ND4	459	3	22.3006	0.111819	22.3552	0.127548	1.03856	0.0934113	>0.05
A8WCF8	TPRGL_RAT	Tumor protein p63-regulated gene 1-like protein (Mossy fiber terminal-associated vertebrate-specific presynaptic protein)	Tprg1l Mover	266	3	22.7273	0.112388	22.7095	0.153755	0.987722	0.101219	>0.05	2	20.5337	0.113038	20.6863	0.119438	1.11155	0.0850049	>0.05
A9UMV9	A9UMV9_RAT	Ndufa7 protein (Protein Ndufa7) (RCG37550, isoform CRA_a)	Ndufa7l Ndufa7 rCG_37550	112									2	23.3903	0.0467436	23.4492	0.0598059	1.04166	0.0416485	>0.05
A9UMW2	A9UMW2_RAT	Ndufa3 protein (Fragment)	Ndufa3	83	3	24.5528	0.07537	24.4521	0.0760788	0.932611	0.0468984	>0.05
B0BMX3	B0BMX3_RAT	Protein S100a16 (S100 calcium binding protein A16 (Predicted), isoform CRA_a) (S100a16 protein)	S100a16 S100a16_predicted rCG_62722	123	3	21.4918	0.103222	21.2787	0.107239	0.862731	0.0585209	>0.05	3	21.6934	0.0959628	21.612	0.0493963	0.945114	0.0316927	>0.05
B0BMY7	B0BMY7_RAT	Protein Twf2 (Protein tyrosine kinase 9-like (A6-related protein) (Predicted), isoform CRA_b) (Ptk9l protein)	Twf2 LOC684352 Ptk9l Ptk9l_predicted rCG_25118	349	4	23.0314	0.0421514	22.972	0.0680179	0.959687	0.0466557	>0.05	4	21.5956	0.108855	21.6589	0.0746646	1.04484	0.0532415	>0.05
B0BN37	B0BN37_RAT	Uncharacterized protein (Fragment)	Hexdc	466	2	18.8451	0.218565	18.9759	0.207373	1.09488	0.182246	>0.05
B0BN52	B0BN52_RAT	Mitochondrial carrier homolog 2 (C. elegans) (Mitochondrial carrier homolog 2 (C. elegans) (Predicted), isoform CRA_a) (Protein Mtch2)	Mtch2 Mtch2_predicted rCG_26739	303	9	26.0671	0.0713464	26.2385	0.0416561	1.12616	0.0330122	>0.05	7	25.0117	0.0445225	25.0338	0.0371148	1.01544	0.0271736	>0.05
B0BN63	B0BN63_RAT	LOC681996 protein (Protein Ahsa1) (RCG20659, isoform CRA_b)	Ahsa1 LOC681996 rCG_20659	338	4	24.4356	0.0889909	24.4857	0.058921	1.03532	0.0464051	>0.05	5	23.8473	0.100641	23.9253	0.0882142	1.05556	0.0642089	>0.05
B0BN65	B0BN65_RAT	Family with sequence similarity 49, member A (Protein Fam49a) (Putative uncharacterized protein RGD1305961_predicted)	Fam49a RGD1305961_predicted rCG_62196	323	10	25.1636	0.0640102	25.1981	0.0833723	1.0242	0.0578369	>0.05	11	24.2322	0.0958553	24.2341	0.0860716	1.00128	0.0582332	>0.05
B0BN81	B0BN81_RAT	40S ribosomal protein S5 (Ribosomal protein S5, isoform CRA_b) (Rps5 protein)	Rps5 rCG_27438	204	2	24.2183	0.102429	24.2529	0.0591366	1.0243	0.0415448	>0.05	2	23.1955	0.0979057	23.1445	0.0725798	0.965266	0.0516557	>0.05
B0BN85	SUGT1_RAT	Suppressor of G2 allele of SKP1 homolog	Sugt1	336	2	19.5576	0.874601	20.5711	0.0757271	2.01876	0.101648	>0.05	2	18.7993	0.179452	18.8428	0.242553	1.03059	0.171264	>0.05
B0BN93	PSD13_RAT	26S proteasome non-ATPase regulatory subunit 13 (26S proteasome regulatory subunit RPN9) (26S proteasome regulatory subunit S11) (26S proteasome regulatory subunit p40.5)	Psmd13	376	4	22.3821	0.0599958	22.4509	0.0458945	1.04886	0.0333607	>0.05	2	19.6606	0.121997	19.5416	0.101676	0.920827	0.0639155	>0.05
B0BN94	F136A_RAT	Protein FAM136A	Fam136a	138									2	20.1964	0.0772124	20.2089	0.0717246	1.00869	0.0517804	>0.05
B0BNB2	B0BNB2_RAT	Density-regulated protein	Denr LOC687565 rCG_21490	194									3	20.4561	0.0643122	20.4595	0.0561909	1.00231	0.0396987	>0.05
B0BND0	ENPP6_RAT	Ectonucleotide pyrophosphatase/phosphodiesterase family member 6 (E-NPP 6) (NPP-6) (EC 3.1.4.-) (EC 3.1.4.38) (Choline-specific glycerophosphodiester phosphodiesterase) (Glycerophosphocholine cholinephosphodiesterase) (GPC-Cpde)	Enpp6	440	8	23.1144	0.0737429	22.7486	0.164952	0.776006	0.0409185	<0.001	9	22.9844	0.0935184	22.777	0.0691178	0.866071	0.0433409	>0.05
B0BNE5	ESTD_RAT	S-formylglutathione hydrolase (FGH) (EC 3.1.2.12) (Esterase D)	Esd	282	9	26.1789	0.0694211	26.2721	0.0527977	1.06679	0.0374697	>0.05	8	25.0625	0.0377931	25.1702	0.0183162	1.07749	0.0139699	<0.05
B0BNE6	B0BNE6_RAT	NADH dehydrogenase (Ubiquinone) Fe-S protein 8 (Predicted), isoform CRA_a (Ndufs8 protein) (Protein Ndufs8)	Ndufs8 Ndufs8_predicted rCG_47133	212	5	26.3156	0.0553677	26.2443	0.0252166	0.95176	0.0161569	>0.05	5	24.9006	0.0488262	25.0111	0.0431418	1.0796	0.0314357	>0.05
B0BNE7	B0BNE7_RAT	Tetraspanin	Tspan7 Tm4sf2_mapped rCG_42841	249	2	23.2973	0.0620814	23.0905	0.0594023	0.866452	0.0368272	<0.05	2	20.7598	0.0838452	20.6934	0.0510162	0.955062	0.0340228	>0.05
B0BNF6	B0BNF6_RAT	Membrane-associated ring finger (C3HC4) 5 (Membrane-associated ring finger (C3HC4) 5 (Predicted)) (Protein March5)	March5 March5_predicted rCG_47500	278	2	21.7089	0.0417531	21.7033	0.0347069	0.996084	0.0241032	>0.05	2	21.0051	0.0552463	20.9843	0.0379041	0.985739	0.025586	>0.05
B0BNJ1	B0BNJ1_RAT	LOC683667 protein (Protein Sri)	Sri LOC683667	198	2	23.393	0.0726533	23.2579	0.0712231	0.9106	0.0464771	>0.05
B0BNK1	B0BNK1_RAT	Protein Rab5c (RCG32615, isoform CRA_a) (Rab5c protein)	Rab5c rCG_32615	216	4	25.7214	0.101445	25.6211	0.0809091	0.932817	0.0553313	>0.05	4	24.2181	0.0352721	23.8962	0.0287273	0.799989	0.0205749	<0.001
B0BNL2	B0BNL2_RAT	PDZ domain-containing protein 2 (Peptidylprolyl cis/trans isomerase, NIMA-interacting 1) (Protein (Peptidyl-prolyl cis/trans isomerase) NIMA-interacting 1 (Predicted), isoform CRA_a)	LOC364561 Pin1 Pin1_predicted rCG_31594	165	7	25.9404	0.0680933	25.8958	0.0499038	0.969566	0.0340159	>0.05	7	24.38	0.0465647	24.3818	0.0464265	1.00123	0.0331662	>0.05
B0BNM1	NNRE_RAT	NAD(P)H-hydrate epimerase (EC 5.1.99.6) (Apolipoprotein A-I-binding protein) (AI-BP) (NAD(P)HX epimerase)	Apoa1bp Aibp	282	5	25.2309	0.0490219	25.3831	0.0578598	1.11126	0.0478381	>0.05	4	24.0947	0.0595617	24.212	0.0450087	1.08471	0.032518	>0.05
B0BNM9	GLTP_RAT	Glycolipid transfer protein (GLTP)	GLTP	209	6	23.915	0.0788856	23.8372	0.105751	0.947493	0.0808935	>0.05	3	22.6601	0.10295	22.5274	0.0867079	0.912076	0.0540682	>0.05
B0BNN3	CAH1_RAT	Carbonic anhydrase 1 (EC 4.2.1.1) (Carbonate dehydratase I) (Carbonic anhydrase I) (CA-I)	Ca1 Car1	261	5	24.4311	0.103025	24.2085	0.0611863	0.857038	0.0351967	>0.05	3	21.6334	0.102136	21.1741	0.181547	0.727323	0.0642747	<0.01
B0K008	B0K008_RAT	Eukaryotic translation initiation factor 1 (Protein Eif1) (RCG33041, isoform CRA_b)	Gm5471 Eif1 Eif1l1 rCG_33041	113	3	23.1694	0.086682	23.345	0.0801321	1.12947	0.0617049	>0.05
B0K010	B0K010_RAT	Protein Txndc17 (Thioredoxin domain containing 17) (Thioredoxin-like 5 (Predicted), isoform CRA_b)	Txndc17 Txnl5_predicted rCG_32915	123	2	23.2214	0.109282	23.3237	0.0638855	1.07351	0.0431825	>0.05	2	20.6986	0.0324507	20.7001	0.0368907	1.00102	0.0265966	>0.05
B0K014	B0K014_RAT	D-tyrosyl-tRNA(Tyr) deacylase (EC 3.1.-.-)	Dtd1	209	4	25.2344	0.0892318	25.0099	0.174429	0.855885	0.0854321	>0.05	5	25.08	0.0296941	25.0477	0.0375377	0.977863	0.0266697	>0.05
B0K020	CISD1_RAT	CDGSH iron-sulfur domain-containing protein 1 (MitoNEET)	Cisd1	108	6	27.9541	0.0645832	28.0244	0.0654519	1.0499	0.0500432	>0.05	6	27.4333	0.0322754	27.5038	0.0303528	1.05009	0.0218071	>0.05
B0K031	B0K031_RAT	60S ribosomal protein L7 (RCG30479, isoform CRA_b) (Rpl7 protein)	Rpl7 rCG_30479	260	5	22.1246	0.163532	22.1234	0.112136	0.999124	0.0774597	>0.05
B0LT89	STK24_RAT	Serine/threonine-protein kinase 24 (EC 2.7.11.1) (Mammalian STE20-like protein kinase 3) (MST-3) (MST3b) (STE20-like kinase MST3) [Cleaved into: Serine/threonine-protein kinase 24 35 kDa subunit (Mammalian STE20-like protein kinase 3 N-terminal) (MST3/N); Serine/threonine-protein kinase 24 12 kDa subunit (Mammalian STE20-like protein kinase 3 C-terminal) (MST3/C)]	Stk24 Mst3 Stk3	431									2	19.7415	0.123095	19.7265	0.0715052	0.989696	0.0477663	>0.05
B0VXR4	B0VXR4_RAT	JIP3 protein	Mapk8ip3 JIP3	1322	5	21.796	0.132048	21.606	0.0852764	0.876588	0.0556903	>0.05	2	19.154	0.0885353	19.2835	0.110835	1.09395	0.0813078	>0.05
B1H270	B1H270_RAT	Succinyl-CoA ligase subunit beta (EC 6.2.1.-)	Suclg2 rCG_56440	434	2	20.3211	0.117988	20.349	0.110181	1.01957	0.0901214	>0.05
B1H2A2	B1H2A2_RAT	Fsd1 protein (Similar to fibronectin type 3 and SPRY domain-containing protein, isoform CRA_a)	Fsd1 LOC301506 rCG_45013	496	2	21.3133	0.139166	21.356	0.132288	1.03002	0.101046	>0.05
B1VKB4	B1VKB4_RAT	Synaptopodin	Synpo	905	14	27.5533	0.0567271	27.5269	0.0574234	0.981885	0.0399416	>0.05
B1WBS4	B1WBS4_RAT	Protein Vps26b (Similar to Vacuolar protein sorting 26 homolog (VPS26 protein homolog), isoform CRA_a) (Vps26b protein)	Vps26b LOC300472 rCG_22813	336	4	23.4237	0.101	23.409	0.113369	0.989855	0.0778653	>0.05	3	21.4166	0.0550504	21.4483	0.069324	1.02216	0.0507554	>0.05
B1WBU9	B1WBU9_RAT	Alpha-1,4 glucan phosphorylase (EC 2.4.1.1)	Pygm	842	18	27.3133	0.0769286	27.324	0.0820724	1.00741	0.0580786	>0.05
B1WBV6	B1WBV6_RAT	Aplp1 protein	Aplp1	644									2	20.0629	0.230328	20.3401	0.132848	1.21184	0.112238	>0.05
B1WBW4	ARM10_RAT	Armadillo repeat-containing protein 10	Armc10	306	4	21.6856	0.0574277	21.6567	0.074402	0.980172	0.0520029	>0.05	5	21.2395	0.0622533	21.3387	0.0432628	1.07119	0.0330845	>0.05
B1WBX6	B1WBX6_RAT	Protein Smap2 (Smap2 protein)	Smap2	428									4	20.6709	0.106741	20.5605	0.11149	0.926389	0.0688582	>0.05
B1WC26	B1WC26_RAT	N-acetylneuraminic acid synthase (N-acetylneuraminic acid synthase (Sialic acid synthase) (Predicted), isoform CRA_a) (Protein Nans)	Nans Nans_predicted rCG_55111	359	4	24.5074	0.0234889	24.58	0.0323821	1.05162	0.0235845	>0.05	4	22.9605	0.0424516	22.9837	0.0543289	1.01621	0.0381325	>0.05
B1WC34	B1WC34_RAT	Protein Prkcsh (Protein kinase C substrate 80K-H) (Protein kinase C substrate 80K-H (Predicted), isoform CRA_b)	Prkcsh Prkcsh_predicted rCG_31596	525	5	23.5728	0.0688637	23.5543	0.0550634	0.987234	0.0383463	>0.05	6	22.7755	0.0702336	22.7285	0.0562631	0.967966	0.0363167	>0.05
B1WC49	B1WC49_RAT	Api5 protein (Protein Api5) (RCG26895, isoform CRA_b)	Api5 rCG_26895	504									3	21.7233	0.112175	21.7269	0.118994	1.0025	0.0831938	>0.05
B1WC50	B1WC50_RAT	Ewsr1 protein (Protein Ewsr1) (RCG36110, isoform CRA_a)	Ewsr1 rCG_36110	655	2	22.5253	0.120759	22.4373	0.11994	0.94085	0.0735129	>0.05	2	21.8057	0.143938	21.8587	0.176274	1.03739	0.136254	>0.05
B1WC61	B1WC61_RAT	Acad9 protein (Protein Acad9)	Acad9	625	10	24.7563	0.0726819	24.7977	0.0761787	1.02915	0.0537226	>0.05	11	23.4667	0.0591901	23.451	0.0399775	0.989166	0.0273534	>0.05
B1WC64	B1WC64_RAT	Cyp46a1 protein	Cyp46a1	500	6	22.5507	0.0787111	22.6519	0.0817622	1.07272	0.0636107	>0.05	7	21.6213	0.0490584	21.8086	0.0467638	1.13861	0.0374667	<0.05
B1WC73	B1WC73_RAT	ADP-ribosylation factor-like 6 (Predicted), isoform CRA_a (Arl6 protein)	Arl6 Arl6_predicted rCG_52680	186	2	20.053	0.0716465	20.1286	0.0942673	1.05384	0.0632131	>0.05
B1WC83	B1WC83_RAT	Pcp4l1 protein (Protein Pcp4l1) (RCG20116, isoform CRA_c)	Pcp4l1 rCG_20116	68									2	21.1396	0.11891	21.3404	0.0584784	1.14928	0.0479997	>0.05
B2DD29	BRSK1_RAT	Serine/threonine-protein kinase BRSK1 (EC 2.7.11.1) (EC 2.7.11.26) (Brain-specific serine/threonine-protein kinase 1) (BR serine/threonine-protein kinase 1) (Serine/threonine-protein kinase SAD-B)	Brsk1 Sadb	778	3	21.2282	0.10039	21.3241	0.0677357	1.06873	0.0511131	>0.05	5	21.1904	0.0610201	21.1654	0.044765	0.982836	0.0307275	>0.05
B2GUV5	B2GUV5_RAT	ATPase, H transporting, lysosomal V1 subunit G1 (Protein Atp6v1g1) (RCG55259, isoform CRA_c)	Atp6v1g1 rCG_55259	118	3	24.4303	0.184555	24.5953	0.150334	1.12115	0.117787	>0.05	3	23.814	0.168975	23.912	0.139967	1.07023	0.103929	>0.05
B2GUY4	B2GUY4_RAT	Epb4.9 protein (Protein Dmtn)	Dmtn Epb4.9 Epb49	354	7	25.247	0.0611905	25.1442	0.0567879	0.931174	0.0361959	>0.05	5	23.8179	0.0407492	23.8038	0.0655987	0.990284	0.0429495	>0.05
B2GUZ3	B2GUZ3_RAT	Mthfd1l protein (Protein Mthfd1l)	Mthfd1l	977	3	22.316	0.048078	22.2362	0.054566	0.946203	0.0359558	>0.05	5	21.0496	0.0804262	21.1088	0.0830761	1.04191	0.0552832	>0.05
B2GUZ5	CAZA1_RAT	F-actin-capping protein subunit alpha-1 (CapZ alpha-1)	Capza1	286	6	25.45	0.0355868	25.4844	0.0765019	1.02412	0.0601519	>0.05	6	24.6126	0.103542	24.627	0.0715406	1.01003	0.0541856	>0.05
B2GUZ9	B2GUZ9_RAT	Fam49b protein (Protein Fam49b) (Similar to 0910001A06Rik protein (Predicted), isoform CRA_a)	Fam49b RGD1307697_predicted rCG_59591	324	13	26.5171	0.0814653	26.6542	0.0880055	1.09971	0.0646888	>0.05	13	24.7836	0.041586	24.8348	0.0343524	1.03615	0.0244566	>0.05
B2GV06	SCOT1_RAT	Succinyl-CoA:3-ketoacid coenzyme A transferase 1, mitochondrial (EC 2.8.3.5) (3-oxoacid CoA-transferase 1) (Somatic-type succinyl-CoA:3-oxoacid CoA-transferase) (SCOT-s)	Oxct1 Oxct Scot	520	15	26.2561	0.0329288	26.3115	0.0534678	1.0392	0.0396486	>0.05	13	24.9628	0.0504729	24.9944	0.048009	1.02218	0.0327518	>0.05
B2GV15	B2GV15_RAT	Dihydrolipoamide branched chain transacylase E2 (Dihydrolipoamide branched chain transacylase E2, isoform CRA_b) (Protein Dbt)	Dbt rCG_28617	482	3	22.2783	0.195873	22.4676	0.279174	1.14015	0.228387	>0.05
B2GV54	NCEH1_RAT	Neutral cholesterol ester hydrolase 1 (NCEH) (EC 3.1.1.-) (Arylacetamide deacetylase-like 1)	Nceh1 Aadacl1	408	4	23.4108	0.0661371	23.5206	0.0886554	1.07908	0.0651561	>0.05	3	21.2622	0.0915797	21.4908	0.0559824	1.17174	0.0459019	<0.05
B2GV72	B2GV72_RAT	Carbonyl reductase 3 (Carbonyl reductase 3 (Predicted)) (Protein Cbr3)	Cbr3 Cbr3_predicted rCG_53069	277	6	24.0041	0.135149	23.8203	0.13923	0.880373	0.0698249	>0.05	4	22.4203	0.0845978	22.7718	0.16282	1.2759	0.142083	>0.05
B2GV73	B2GV73_RAT	Actin-related protein 2/3 complex subunit 3 (Arp2/3 complex 21 kDa subunit)	Arpc3 Arpc3_predicted rCG_21863	178	4	23.3336	0.0949047	23.464	0.0919179	1.09466	0.0656574	>0.05	2	21.2321	0.0660304	21.2305	0.063449	0.998849	0.045707	>0.05
B2GV74	B2GV74_RAT	Kinesin light chain 2 (Predicted), isoform CRA_b (Klc2 protein) (Protein Klc2)	Klc2 Klc2_predicted rCG_48462	622									6	21.8535	0.0317606	21.8578	0.0420998	1.003	0.0272107	>0.05
B2GVB4	B2GVB4_RAT	Sept9 protein (Fragment)	42256	550	10	24.89	0.0423694	24.899	0.0374337	1.00626	0.026026	>0.05
B2LYI9	B2LYI9_RAT	Tenascin C	Tnc	2019	3	20.7949	0.181113	20.6013	0.115452	0.874436	0.0804755	>0.05
B2RYG2	B2RYG2_RAT	Pck2 protein (Fragment)	Pck2	663									3	23.5643	0.0670124	23.6388	0.053061	1.05301	0.0389377	>0.05
B2RYG6	OTUB1_RAT	Ubiquitin thioesterase OTUB1 (EC 3.4.19.12) (Deubiquitinating enzyme OTUB1) (OTU domain-containing ubiquitin aldehyde-binding protein 1) (Otubain-1) (Ubiquitin-specific-processing protease OTUB1)	Otub1	271	10	27.322	0.0214201	27.3064	0.0269322	0.989216	0.0187469	>0.05	10	26.0793	0.0436257	26.0971	0.0410717	1.01242	0.0291015	>0.05
B2RYJ7	B2RYJ7_RAT	ARP1 actin-related protein 1 homolog B (Yeast) (Protein Actr1b) (RCG22324, isoform CRA_a)	Actr1b rCG_22324	376	11	26.3229	0.0578732	26.3364	0.0451988	1.00941	0.0322097	>0.05	13	25.6471	0.0253961	25.6541	0.0309247	1.00482	0.0216528	>0.05
B2RYM9	B2RYM9_RAT	Protein Slc35c2 (Slc35c2 protein) (Solute carrier family 35, member C2, isoform CRA_b)	Slc35c2 rCG_32243	364									2	24.1074	0.348693	24.0645	0.315994	0.970727	0.218313	>0.05
B2RYN0	B2RYN0_RAT	Pgm3 protein (Phosphoglucomutase 3 (Predicted), isoform CRA_b)	Pgm3 Pgm3_predicted rCG_25231	542	4	21.3617	0.199128	21.2163	0.190412	0.904113	0.117119	>0.05	4	21.9804	0.145282	21.9784	0.0889453	0.998632	0.0637204	>0.05
B2RYN6	B2RYN6_RAT	Adaptor-related protein complex 1, gamma 1 subunit, isoform CRA_b (Ap1g1 protein)	Ap1g1 rCG_51678	822	4	21.8939	0.349109	21.4921	0.200833	0.756908	0.117653	>0.05
B2RYQ2	B2RYQ2_RAT	Serine/threonine-protein phosphatase 2A activator (EC 5.2.1.8) (Phosphotyrosyl phosphatase activator)	Ppp2r4 Ppp2r4_predicted rCG_45567	323	8	25.32	0.0421848	25.3616	0.038967	1.02921	0.0277441	>0.05	9	24.0887	0.0845482	24.1218	0.0821092	1.02322	0.0569678	>0.05
B2RYQ5	B2RYQ5_RAT	Enhancer of rudimentary homolog	Erh rCG_20904	104	2	20.6036	0.414184	21.1852	0.19283	1.49659	0.14552	>0.05
B2RYS2	B2RYS2_RAT	Cytochrome b-c1 complex subunit 7	Uqcrb LOC685596 rCG_60159	111	9	27.8951	0.0619995	27.8428	0.0676436	0.964416	0.0451466	>0.05	9	27.1501	0.0259259	27.1907	0.0244192	1.02858	0.0173426	>0.05
B2RYS8	B2RYS8_RAT	NADH dehydrogenase (Ubiquinone) 1 beta subcomplex 8 (NADH dehydrogenase (Ubiquinone) 1 beta subcomplex 8 (Predicted), isoform CRA_a) (Protein Ndufb8)	Ndufb8 Ndufb8_predicted rCG_57427	186	5	26.0495	0.0581151	26.0822	0.0534372	1.0229	0.0380584	>0.05	5	25.3138	0.0536746	25.3713	0.0546196	1.04062	0.0399133	>0.05
B2RYT5	B2RYT5_RAT	Cox7a2l protein (Cytochrome c oxidase subunit VIIa polypeptide 2 like (Predicted), isoform CRA_d)	Cox7a2l Cox7a2l_predicted rCG_61728	113	5	25.9349	0.0598036	25.9523	0.0374285	1.01216	0.0264917	>0.05	4	24.0722	0.0647684	24.0126	0.0549689	0.959556	0.0375646	>0.05
B2RYW3	B2RYW3_RAT	NADH dehydrogenase (Ubiquinone) 1 beta subcomplex, 9 (NADH dehydrogenase (Ubiquinone) 1 beta subcomplex, 9 (Predicted)) (Ndufb9 protein) (Protein Ndufb9)	Ndufb9 Ndufb9_predicted rCG_60288	179	6	25.573	0.0482484	25.5664	0.0643194	0.995426	0.0428502	>0.05	5	24.1347	0.134839	24.2567	0.084962	1.08827	0.063301	>0.05
B2RYW9	FAHD2_RAT	Fumarylacetoacetate hydrolase domain-containing protein 2 (EC 3.-.-.-)	Fahd2 Fahd2a	313	10	26.3374	0.0384181	26.3329	0.0356656	0.996876	0.0261607	>0.05	7	24.6835	0.038692	24.8052	0.0278865	1.08803	0.0210498	<0.05
B2RYX1	B2RYX1_RAT	LOC685322 protein (RCG36127, isoform CRA_c)	Uqcr10 LOC685322 rCG_36127	64	2	26.2138	0.0949578	26.0834	0.0619498	0.913627	0.0402627	>0.05	2	25.2924	0.115184	25.4973	0.0654003	1.15257	0.0473937	>0.05
B2RZ24	B2RZ24_RAT	Succinyl-CoA ligase subunit beta (EC 6.2.1.-) (Fragment)	Sucla2	438	19	28.2591	0.0256683	28.2734	0.0318739	1.01002	0.0217194	>0.05
B2RZ27	B2RZ27_RAT	Protein Sh3bgrl3 (SH3 domain binding glutamic acid-rich protein-like 3) (SH3 domain binding glutamic acid-rich protein-like 3 (Predicted), isoform CRA_b)	Sh3bgrl3 Sh3bgrl3_predicted rCG_30780	93	5	26.6867	0.0706943	26.8055	0.0709675	1.0859	0.0507934	>0.05	5	23.1084	0.0589099	23.2208	0.0555412	1.08102	0.0388734	>0.05
B2RZ37	REEP5_RAT	Receptor expression-enhancing protein 5 (Polyposis locus protein 1 homolog)	Reep5 Dp1	189	5	24.3425	0.212469	24.2557	0.186798	0.941563	0.123501	>0.05	5	23.9231	0.10286	23.7659	0.0936022	0.896794	0.0604889	>0.05
B2RZ62	B2RZ62_RAT	Ap3s1 protein	Ap3s1	162	2	22.1928	0.0928285	22.1486	0.0901783	0.969782	0.0704037	>0.05	2	20.5335	0.0996705	20.5092	0.0941151	0.983301	0.0650625	>0.05
B2RZ63	B2RZ63_RAT	WD repeat domain 13 (WD repeat domain 13 (Predicted), isoform CRA_b)	Wdr13 Wdr13_predicted rCG_22840	393	5	23.192	0.0905869	23.1407	0.0706395	0.965059	0.0497678	>0.05
B2RZ72	B2RZ72_RAT	Actin related protein 2/3 complex, subunit 4 (Predicted), isoform CRA_a (Arpc4 protein) (Protein Arpc4)	Arpc4 Arpc4_predicted rCG_56555	168	5	25.7287	0.103171	25.7952	0.0991003	1.04718	0.0735624	>0.05	6	25.2189	0.075694	25.2412	0.0510131	1.01558	0.0377109	>0.05
B2RZ78	VPS29_RAT	Vacuolar protein sorting-associated protein 29 (Vesicle protein sorting 29)	Vps29	182	3	23.4908	0.0987307	23.561	0.0578307	1.04979	0.0453457	>0.05	2	21.5362	0.0977828	21.4664	0.0682297	0.952758	0.0466058	>0.05
B2RZA9	B2RZA9_RAT	Protein Ube2l3 (Ube2l3 protein)	Ube2l3	154	4	26.4376	0.0455257	26.4524	0.0775248	1.01028	0.0530074	>0.05	6	25.4782	0.0291579	25.4926	0.0411861	1.01007	0.0288062	>0.05
B2RZC6	B2RZC6_RAT	Ilf2 protein (RCG62739, isoform CRA_a)	Ilf2 rCG_62739	390	3	23.1452	0.0766736	23.2172	0.0555973	1.05115	0.0421536	>0.05	4	21.9923	0.0259375	22.0089	0.0320803	1.01157	0.0226816	>0.05
B2RZD6	B2RZD6_RAT	Ndufa4 protein (Protein Ndufa4) (RCG28086, isoform CRA_a)	Ndufa4 rCG_28086	82	2	28.3285	0.0925425	28.3158	0.108787	0.991218	0.0754877	>0.05	2	27.0827	0.0448982	27.2056	0.0223239	1.08892	0.0167026	<0.05
B3GNI6	SEP11_RAT	Septin-11	42258	431	21	28.2815	0.0329956	28.2235	0.041082	0.960594	0.0276559	>0.05	20	27.0725	0.0428583	27.1103	0.0374609	1.02654	0.0268515	>0.05
B4F772	B4F772_RAT	Heat shock 70 kDa protein 4L (Heat shock 70kDa protein 4-like (Predicted), isoform CRA_b) (Hspa4l protein)	Hspa4l Hspa4l_predicted rCG_41537	838	26	27.0034	0.0475109	26.9824	0.0473404	0.985536	0.0326948	>0.05	22	25.6009	0.0488898	25.608	0.0513377	1.00492	0.0352677	>0.05
B4F774	B4F774_RAT	Ganglioside-induced differentiation-associated protein 1-like 1 (Predicted) (Gdap1l1 protein) (Protein Gdap1l1)	Gdap1l1 Gdap1l1_predicted rCG_32097	366	6	24.2901	0.0731501	24.3105	0.096585	1.01429	0.0666531	>0.05	7	23.3293	0.0782074	23.3888	0.0713557	1.04214	0.0522028	>0.05
B4F7A3	B4F7A3_RAT	Galectin	Lgalsl Hspc159 rCG_23337	172	4	24.1145	0.083966	24.1653	0.157267	1.03581	0.173711	>0.05	2	21.7429	0.0573577	21.7021	0.0736577	0.972075	0.0529314	>0.05
B4F7B3	B4F7B3_RAT	Protein Wdr63 (Wdr63 protein)	Wdr63	921	2	22.8496	0.0702294	23.0703	0.102429	1.16531	0.102478	>0.05
B4F7C2	B4F7C2_RAT	Protein Tubb4a (RCG45085) (Tubulin, beta 4)	Tubb4a Tubb4 rCG_45085	444	43	34.3247	0.0221367	34.3273	0.0246861	1.00183	0.0169447	>0.05	44	33.4081	0.0148235	33.3734	0.0206059	0.976221	0.0137343	>0.05
B4F7C7	B4F7C7_RAT	Hebp1 protein (Heme binding protein 1 (Predicted), isoform CRA_a)	Hebp1 Hebp1_predicted rCG_29707	190	6	25.6853	0.06539	25.7828	0.0660294	1.06994	0.052956	>0.05	7	24.1032	0.0818961	24.1869	0.0551562	1.05971	0.040181	>0.05
B4F7E8	NIBL1_RAT	Niban-like protein 1 (Protein FAM129B)	Fam129b	747									2	25.9903	0.0664752	25.9974	0.102118	1.00497	0.0687396	>0.05
B5DEG8	B5DEG8_RAT	LOC685144 protein (Protein Sec24c) (RCG41932)	Sec24c LOC685144 rCG_41932	1095	2	20.6473	0.238567	20.6774	0.205333	1.02109	0.117083	>0.05
B5DEL8	B5DEL8_RAT	NADH dehydrogenase (Ubiquinone) Fe-S protein 5 (Protein LOC100361505) (RCG31129, isoform CRA_b)	LOC100363268 LOC100361505 Ndufs5 rCG_31129	106	4	25.7898	0.0672676	25.9138	0.0638756	1.08974	0.0464334	>0.05	4	24.4039	0.0181942	24.4457	0.0431948	1.02937	0.0306231	>0.05
B5DEN5	B5DEN5_RAT	Eukaryotic translation elongation factor 1 beta 2 (Protein Eef1b2) (RCG22471, isoform CRA_b)	Eef1b2 rCG_22471	225	5	25.3126	0.110684	25.3235	0.0500895	1.00757	0.0354576	>0.05	7	24.5407	0.0805994	24.5061	0.0441418	0.976307	0.0302208	>0.05
B5DEP1	B5DEP1_RAT	Pdcd6 protein	Pdcd6	189									2	20.889	0.064429	20.7753	0.0726675	0.924226	0.0465753	>0.05
B5DES0	B5DES0_RAT	Protein Snrpd2 (RCG54604) (Small nuclear ribonucleoprotein D2)	Snrpd2 rCG_54604	118									2	20.4386	0.110501	20.4858	0.126988	1.03324	0.0941241	>0.05
B5DEX7	B5DEX7_RAT	Atp13a1 protein (Fragment)	Atp13a1	1192	2	20.4623	0.186047	20.2514	0.104539	0.863981	0.057724	>0.05
B5DF03	B5DF03_RAT	Peptidyl-prolyl cis-trans isomerase (Fragment)	Fkbp3	220									2	20.6443	0.129389	20.5485	0.120478	0.935707	0.0733293	>0.05
B5DF41	SNPH_RAT	Syntaphilin	Snph	504	5	23.9423	0.0695163	24.0252	0.057529	1.0591	0.0431753	>0.05	3	21.4273	0.120693	21.4148	0.133104	0.991327	0.0911215	>0.05
B5DF55	B5DF55_RAT	Protein Stam (RCG55706) (Signal transducing adaptor molecule (SH3 domain and ITAM motif) 1)	Stam rCG_55706	547	4	23.6542	0.0638105	23.568	0.0429827	0.942053	0.029249	>0.05	3	21.9042	0.0906834	21.8746	0.0578106	0.97971	0.0411836	>0.05
B5DF65	B5DF65_RAT	Biliverdin reductase B (Flavin reductase (NADPH)) (Biliverdin reductase B (Flavin reductase (NADPH)) (Predicted), isoform CRA_b) (Protein Blvrb)	Blvrb Blvrb_predicted LOC681468 rCG_53861	206	7	26.3662	0.0542874	26.3922	0.0367689	1.01814	0.0256246	>0.05	6	25.8321	0.0502684	25.9209	0.067745	1.06349	0.0527993	>0.05
B5DF89	CUL3_RAT	Cullin-3	Cul3	768	3	22.5566	0.0946973	22.7032	0.0510116	1.10695	0.0404384	>0.05	4	22.4308	0.0564309	22.442	0.0541157	1.00781	0.0395646	>0.05
B5DF91	B5DF91_RAT	ELAV-like protein	Elavl1 Elavl1_predicted hur rCG_58936	326	3	22.7275	0.0563441	22.7141	0.0486119	0.990786	0.0354321	>0.05	4	22.0169	0.0550803	22.1039	0.0401017	1.06217	0.029328	>0.05
B5DFA4	B5DFA4_RAT	Uncharacterized protein (Fragment)	0	431									2	18.5353	0.30843	18.3829	0.257332	0.899769	0.18162	>0.05
B5DFB2	B5DFB2_RAT	Protein Rbbp4 (RCG30896) (Rbbp4 protein)	Rbbp4 rCG_30896	425									3	21.1335	0.0710796	21.2128	0.0541981	1.05649	0.0425995	>0.05
B5DFC3	B5DFC3_RAT	Protein Sec23a (SEC23A (S. cerevisiae) (Predicted)) (Sec23 homolog A (S. cerevisiae))	Sec23a Sec23a_predicted rCG_62116	765	5	23.2837	0.123593	23.1357	0.0831094	0.9025	0.0534044	>0.05	5	23.7054	0.3237	23.5838	0.334636	0.919206	0.23558	>0.05
B5DFC6	B5DFC6_RAT	Glucosamine-6-phosphate isomerase (EC 3.5.99.6) (Glucosamine-6-phosphate deaminase)	Gnpda1 rCG_49489	289	3	22.0839	0.0957047	22.0848	0.0570531	1.00061	0.0380531	>0.05
B5DFC8	EIF3C_RAT	Eukaryotic translation initiation factor 3 subunit C (eIF3c) (Eukaryotic translation initiation factor 3 subunit 8) (eIF3 p110)	Eif3c Eif3s8	911									3	23.9486	0.135423	23.9239	0.137451	0.982998	0.0974616	>0.05
B5DFD8	B5DFD8_RAT	SH3 domain-binding glutamic acid-rich-like protein	Sh3bgrl Sh3bgrl_predicted rCG_38007	114	4	22.7055	0.106982	22.8985	0.0632046	1.14308	0.0490867	>0.05	4	22.0464	0.0754181	21.9165	0.0438284	0.91386	0.0272994	>0.05
B5DFE0	B5DFE0_RAT	Mpp6 protein (Protein Mpp6) (RCG52465, isoform CRA_b)	Mpp6 rCG_52465	540	8	23.555	0.057636	23.5301	0.0418731	0.982879	0.0278045	>0.05	6	22.2491	0.100758	22.3688	0.0615384	1.08651	0.044619	>0.05
B5DFF7	B5DFF7_RAT	Dusp3 protein	Dusp3	185									5	24.4525	0.0414102	24.385	0.061491	0.954286	0.0415153	>0.05
B5DFG2	B5DFG2_RAT	Hnrnpl protein (Fragment)	Hnrnpl	571	15	26.4184	0.0453913	26.3588	0.0635471	0.959505	0.0410919	>0.05
B5DFG5	B5DFG5_RAT	Protein Sept6 (RCG53214, isoform CRA_d) (Sept6 protein)	Sept6 Nkrf rCG_53214	427	19	28.1698	0.0273101	28.1352	0.0464594	0.97625	0.0319997	>0.05	18	27.084	0.0451972	27.1219	0.0398984	1.02664	0.0289167	>0.05
B5DFH4	B5DFH4_RAT	Papss2 protein (Protein Papss2)	Papss2	614	4	27.952	0.100953	28.0205	0.0991143	1.04864	0.0722165	>0.05
B5DFI9	B5DFI9_RAT	Pdk3 protein (Protein Pdk3) (Pyruvate dehydrogenase kinase, isoenzyme 3 (Mapped), isoform CRA_a)	Pdk3 Pdk3_mapped rCG_36457	415	5	23.4729	0.0587593	23.4193	0.0544577	0.963569	0.0373914	>0.05	5	21.9234	0.0302194	22.0872	0.0789445	1.12019	0.0648878	>0.05
B5DFK1	B5DFK1_RAT	Coatomer subunit alpha	Copa	1224									3	19.4199	0.0648422	19.3111	0.0971673	0.927374	0.0633265	>0.05
B5DFK6	B5DFK6_RAT	AP-3 complex subunit delta	Ap3d1 rCG_29405	1204	16	25.8851	0.16059	25.8609	0.108526	0.983423	0.0750053	>0.05	12	25.4739	0.168777	25.4929	0.134787	1.01326	0.103611	>0.05
B5DFM3	B5DFM3_RAT	Ly6h protein (Fragment)	Ly6h	181	2	26.8052	0.114824	26.7818	0.160471	0.983883	0.121341	>0.05	3	25.7091	0.0845212	25.6793	0.0914214	0.979569	0.0648105	>0.05
B5DFN1	B5DFN1_RAT	Eukaryotic translation initiation factor 1B (Eukaryotic translation initiation factor 1B (Predicted), isoform CRA_b) (Protein Eif1b)	Eif1b Eif1b_predicted rCG_25057	113									3	21.0523	0.084759	21.1276	0.0396075	1.0536	0.0296937	>0.05
B5DFN2	B5DFN2_RAT	Adenosylhomocysteinase (EC 3.3.1.1) (Fragment)	Ahcyl1	482									8	24.7337	0.0444996	24.6625	0.0699701	0.951866	0.0474858	>0.05
B5DFN4	B5DFN4_RAT	Prefoldin 5 (Predicted), isoform CRA_a (Prefoldin subunit 5) (Protein Pfdn5)	Pfdn5 Pfdn5_predicted rCG_50721	154	2	21.9875	0.108228	21.97	0.0771159	0.987929	0.0545684	>0.05	2	20.7205	0.0899453	20.6293	0.0937098	0.938756	0.0600611	>0.05
B6DTP5	B6DTP5_RAT	DEAD (Asp-Glu-Ala-Asp) box polypeptide 5 (Fragment)	Ddx5	614	10	24.2818	0.0580312	24.1829	0.0309557	0.933719	0.020034	>0.05	11	23.4881	0.0529919	23.5532	0.0710848	1.04611	0.050775	>0.05
C7E1V2	C7E1V2_RAT	Inositol 1,4,5-trisphosphate receptor type 1	Itpr1	2748	18	25.5901	0.19442	26.0532	0.199976	1.37846	0.0901935	<0.001
C9EH87	C9EH87_RAT	Alpha II spectrin	0	2498	153	32.3194	0.0196863	32.2813	0.0218581	0.973962	0.0146636	>0.05
D0UFD0	D0UFD0_RAT	Prostate leucine zipper variant 2	PrLZ	224									4	23.0295	0.14666	22.8937	0.14283	0.910192	0.113998	>0.05
D3Z831	D3Z831_RAT	Protein NDRG4	Ndrg4	391	5	24.5467	0.0477477	24.6492	0.0786933	1.07363	0.0621107	>0.05
D3Z8I7	D3Z8I7_RAT	Protein Gstt3 (Similar to Glutathione S-transferase, theta 3 (Predicted))	Gstt3 RGD1562732_predicted rCG_60614	210	4	26.2666	0.22355	25.8481	0.163664	0.748221	0.0845687	>0.05	2	22.5482	0.183842	22.3997	0.118206	0.902199	0.0798842	>0.05
D3Z8M8	D3Z8M8_RAT	TSC22 domain family protein 1	Tsc22d1	1050	3	25.3412	0.237267	25.2181	0.209141	0.918241	0.138358	>0.05
D3Z955	D3Z955_RAT	Protein Pgm2l1 (RCG40012, isoform CRA_a)	Pgm2l1 rCG_40012	621	8	24.4047	0.185903	24.2946	0.145496	0.926535	0.100911	>0.05	12	24.0552	0.138186	24.0782	0.156337	1.01606	0.112052	>0.05
D3Z981	D3Z981_RAT	Protein Plxna1	Plxna1 RGD1560871	1894	3	22.8406	0.0880691	23.1785	0.105463	1.26391	0.0581294	<0.05
D3Z9D0	D3Z9D0_RAT	Protein RGD1306271	RGD1306271	1937	2	18.9973	0.229732	18.71	0.120157	0.819438	0.0666042	>0.05
D3Z9D2	D3Z9D2_RAT	FYVE and coiled-coil domain containing 1 (Predicted) (Protein Fyco1)	Fyco1 Fyco1_predicted rCG_25556	1451									5	20.9347	0.213152	21.107	0.160464	1.12687	0.134831	>0.05
D3Z9L0	D3Z9L0_RAT	Protein Agk (Similar to putative lipid kinase (Predicted), isoform CRA_c)	Agk RGD1562046_predicted rCG_27864	421	7	24.1204	0.0572183	24.1765	0.0296034	1.03961	0.021378	>0.05	4	22.9092	0.0788992	22.985	0.0444572	1.05392	0.0329359	>0.05
D3ZA84	D3ZA84_RAT	Protein Tln2	Tln2	2221	13	24.8247	0.132864	24.8545	0.0854122	1.02086	0.0613856	>0.05	14	24.034	0.0479538	24.1146	0.0496907	1.05743	0.0367833	>0.05
D3ZA85	D3ZA85_RAT	Histone cell cycle regulation defective interacting protein 5 (Predicted), isoform CRA_a (Protein Nfu1)	Nfu1 Hirip5_predicted rCG_56512	253									3	20.435	0.110978	20.5558	0.13056	1.08732	0.0940239	>0.05
D3ZAA0	D3ZAA0_RAT	PRA1 domain family 2 (Predicted) (Protein Praf2)	Praf2 Praf2_predicted rCG_22882	178	2	23.0423	0.0614521	23.0356	0.0667665	0.995353	0.0465561	>0.05
D3ZAA9	D3ZAA9_RAT	Membrane protein, palmitoylated 2 (MAGUK p55 subfamily member 2), isoform CRA_a (Protein Mpp2)	Mpp2 rCG_34691	552	7	23.436	0.0657426	23.3967	0.0688559	0.973124	0.0513426	>0.05	5	20.8057	0.140498	20.7425	0.109647	0.957154	0.0743348	>0.05
D3ZAE5	D3ZAE5_RAT	Calcium-transporting ATPase (EC 3.6.3.8)	Atp2b1 rCG_48704	1220	35	30.0262	0.0408657	29.8976	0.0715789	0.914689	0.0411223	>0.05
D3ZAF6	ATPK_RAT	ATP synthase subunit f, mitochondrial	Atp5j2	88	3	23.5074	0.326311	23.9269	0.183155	1.33752	0.174083	>0.05	3	23.1245	0.37935	23.4221	0.33405	1.22906	0.256451	>0.05
D3ZAM4	D3ZAM4_RAT	Uncharacterized protein	Ccm2l RGD1305202	480	2	23.8431	0.0757954	23.9245	0.0625305	1.05808	0.0443252	>0.05
D3ZAN1	D3ZAN1_RAT	Type I inositol 3,4-bisphosphate 4-phosphatase	Inpp4a	928									5	22.3478	0.585924	22.5638	0.591725	1.16154	0.67756	>0.05
D3ZAN3	D3ZAN3_RAT	Alpha glucosidase 2 alpha neutral subunit (Predicted) (Protein Ganab)	Ganab Ganab_predicted rCG_48309	797	7	23.6496	0.121844	23.5726	0.0866151	0.948054	0.056095	>0.05	10	22.4935	0.0956966	22.386	0.0586665	0.928238	0.0371059	>0.05
D3ZAP9	D3ZAP9_RAT	Glycerol-3-phosphate dehydrogenase [NAD(+)] (EC 1.1.1.8)	Gpd1l	351	8	23.8978	0.0840747	23.7546	0.0689489	0.905454	0.0450639	>0.05	7	23.1607	0.0815199	23.1816	0.097827	1.0146	0.0691224	>0.05
D3ZAX3	D3ZAX3_RAT	Calcium-transporting ATPase (EC 3.6.3.8)	Atp2b1	1184									34	29.1422	0.0208046	29.1851	0.0429159	1.03015	0.0294761	>0.05
D3ZBE2	D3ZBE2_RAT	Protein Acacb	Acacb	2458	3	23.8562	0.129096	23.7698	0.174806	0.941872	0.12057	>0.05
D3ZBF6	D3ZBF6_RAT	Uncharacterized protein	Tchhl1	625									3	20.4737	0.0772668	20.5285	0.0961642	1.03872	0.0667624	>0.05
D3ZBL5	D3ZBL5_RAT	Type I inositol 3,4-bisphosphate 4-phosphatase	Inpp4a	933	7	23.5845	0.0896385	23.763	0.0353912	1.13173	0.0262573	>0.05
D3ZBL6	D3ZBL6_RAT	Protein Nup160	Nup160	1379									3	20.9224	0.153179	20.8472	0.247056	0.949254	0.223766	>0.05
D3ZBN0	H15_RAT	Histone H1.5	Hist1h1b	222									2	22.8281	0.0677941	22.8117	0.112608	0.988698	0.0754072	>0.05
D3ZBS6	D3ZBS6_RAT	Protein RGD1559864	RGD1559864	400	15	28.1619	0.0233412	28.1114	0.0304497	0.965594	0.0202507	>0.05	12	26.9017	0.0345348	26.9657	0.0317217	1.0454	0.0228047	>0.05
D3ZBU7	D3ZBU7_RAT	Protein RGD1310819 (Fragment)	RGD1310819	1109	16	25.0392	0.0518408	25.0318	0.0410165	0.994854	0.0280688	>0.05	15	23.8	0.0391862	23.968	0.0497101	1.12355	0.0383956	<0.05
D3ZC07	D3ZC07_RAT	Protein Pkn3	Pkn3	958	5	23.8893	0.109229	23.8709	0.0486633	0.987268	0.0357049	>0.05	4	22.9172	0.0510549	22.9771	0.0283475	1.0424	0.0202141	>0.05
D3ZC15	D3ZC15_RAT	Protein Rltpr	Rltpr RGD1562390	1297	2	21.1189	0.0906967	20.9855	0.13212	0.911673	0.065607	>0.05	5	20.9495	0.187405	21.1562	0.160067	1.15405	0.127191	>0.05
D3ZC31	D3ZC31_RAT	Protein RGD1560608 (Similar to novel protein (Predicted))	RGD1560608 RGD1560608_predicted rCG_27653	119	3	20.0051	0.304955	20.5891	0.370425	1.49897	0.594356	>0.05
D3ZC55	D3ZC55_RAT	Heat shock 70kDa protein 12A (Predicted), isoform CRA_a (Protein Hspa12a)	Hspa12a Hspa12a_predicted rCG_57494	675	22	28.3516	0.0795089	28.2782	0.0941624	0.950433	0.0591965	>0.05	23	27.2718	0.0253101	27.2369	0.0354637	0.976102	0.0233527	>0.05
D3ZC56	D3ZC56_RAT	Protein Dst (Fragment)	Dst	7350	10	26.4595	0.188164	26.6197	0.170504	1.11741	0.13593	>0.05	15	24.3793	0.0897787	24.5355	0.109207	1.11429	0.0822755	>0.05
D3ZC63	D3ZC63_RAT	Protein Cmpk2 (Thymidylate kinase family LPS-inducible member (Predicted))	Cmpk2 Tyki_predicted rCG_62144	417									4	23.4841	0.163569	23.7015	0.158286	1.16264	0.131719	>0.05
D3ZC84	D3ZC84_RAT	Ubiquitin carboxyl-terminal hydrolase (EC 3.4.19.12)	Usp9x Usp9x_predicted rCG_42844	2547	8	23.2685	0.117045	23.5984	0.114051	1.2569	0.068109	<0.001	7	22.6417	0.144351	22.625	0.115374	0.988461	0.0820469	>0.05
D3ZCA0	D3ZCA0_RAT	Proline synthetase co-transcribed (Predicted) (Protein Prosc)	Prosc Prosc_predicted rCG_43085	275	2	22.4951	0.165532	22.7524	0.0709639	1.19525	0.0590166	>0.05	2	21.6407	0.0861138	21.6331	0.112184	0.994743	0.0843427	>0.05
D3ZCH7	D3ZCH7_RAT	Adducin 3 (Gamma), isoform CRA_b (Gamma-adducin)	Add3 rCG_57421	673									14	24.0587	0.0345176	24.0342	0.038256	0.98316	0.0260367	>0.05
D3ZCM5	D3ZCM5_RAT	Protein Naip6	Naip6	1447	2	21.8041	0.254485	21.6519	0.238453	0.899855	0.172232	>0.05
D3ZCV0	D3ZCV0_RAT	Protein Actn2 (RCG30552)	Actn2 rCG_30552	894	39	28.5238	0.0814266	28.46	0.114786	0.95674	0.0646114	>0.05	36	27.5893	0.0881829	27.688	0.0632578	1.07078	0.0445199	>0.05
D3ZCZ9	D3ZCZ9_RAT	Protein LOC100912599 (RCG41951, isoform CRA_a)	LOC100912599 LOC679739 rCG_41951	116	6	26.797	0.12073	26.6656	0.127874	0.912956	0.0830982	>0.05	6	25.7142	0.0559528	25.7267	0.0490139	1.00872	0.0347114	>0.05
D3ZD04	D3ZD04_RAT	Dystrobrevin	Dtna	687	3	20.9764	0.09307	21.0478	0.138235	1.05075	0.100206	>0.05
D3ZD09	D3ZD09_RAT	Cytochrome c oxidase subunit 6B1	Cox6b1 LOC681754	86	5	29.1651	0.0518264	29.1248	0.0346349	0.972446	0.0235706	>0.05	5	28.0459	0.0756909	28.0353	0.0577293	0.992674	0.0396336	>0.05
D3ZD73	D3ZD73_RAT	Protein Ddx6 (RCG58047)	Ddx6 rCG_58047	483	4	24.2205	0.483795	24.9616	0.376436	1.67149	0.345778	>0.05	4	20.6596	0.0470088	20.7833	0.0674553	1.08955	0.0525175	>0.05
D3ZD97	D3ZD97_RAT	DEAH (Asp-Glu-Ala-His) box polypeptide 15 (Predicted), isoform CRA_b (Protein Dhx15)	Dhx15 Dhx15_predicted LOC100910750 rCG_35948	795	2	22.3943	0.364651	22.2848	0.359328	0.926935	0.26586	>0.05
D3ZDJ3	D3ZDJ3_RAT	Protein Elmod1	Elmod1	334	5	23.0583	0.100087	23.0832	0.0715768	1.0174	0.0486439	>0.05
D3ZDR2	D3ZDR2_RAT	Chromatin modifying protein 6 (Predicted) (Protein Chmp6)	Chmp6 Chmp6_predicted rCG_32788	200	2	21.5221	0.173482	21.672	0.127843	1.10943	0.0922041	>0.05	2	21.1383	0.0454606	21.1793	0.0584998	1.02885	0.0403593	>0.05
D3ZDS8	D3ZDS8_RAT	Protein Zranb3 (Fragment)	Zranb3	1015									2	20.3117	0.109804	20.4074	0.101514	1.06859	0.0851525	>0.05
D3ZDT1	D3ZDT1_RAT	Protein Epb41l2	Epb41l2	919	15	25.6465	0.0564683	25.5799	0.0370396	0.954889	0.024399	>0.05	15	25.3386	0.242561	25.8747	0.11228	1.44999	0.113498	>0.05
D3ZDU5	D3ZDU5_RAT	Profilin	Pfn2 LOC100909840	148									5	26.8441	0.0784583	26.899	0.0564057	1.03877	0.0421228	>0.05
D3ZE15	D3ZE15_RAT	Protein LOC100911483 (RCG38845, isoform CRA_b)	LOC100911483 Ndufa13 rCG_38845	144	5	26.2016	0.0921437	26.2483	0.0956736	1.03294	0.0681472	>0.05	5	25.2556	0.0491013	25.2546	0.0337867	0.99927	0.0235454	>0.05
D3ZE32	D3ZE32_RAT	Protein Vat1l	Vat1l LOC361414	416	11	25.3448	0.124112	25.6421	0.168434	1.22887	0.168002	>0.05	7	23.7066	0.124636	23.8427	0.0930105	1.09891	0.0756489	>0.05
D3ZED6	D3ZED6_RAT	Protein Usp43 (Ubiquitin specific protease 43 (Predicted))	Usp43 Usp43_predicted rCG_32844	1039	2	21.2995	0.290165	21.2252	0.298594	0.94983	0.270148	>0.05
D3ZEG0	D3ZEG0_RAT	Protein H1foo (Similar to oocyte-specific linker histone H1oo (Predicted))	H1foo RGD1566236_predicted rCG_30129	332	2	22.4787	0.103157	22.5152	0.08625	1.02557	0.059816	>0.05
D3ZEH1	D3ZEH1_RAT	Protein Fat4	Fat4	4979	2								4	19.9801	0.337415	20.267	0.386556	1.21997	0.402117	>0.05
D3ZEI4	D3ZEI4_RAT	Protein Hepacam	Hepacam	417	5	24.8573	0.0419874	24.7202	0.0656366	0.909381	0.0431945	>0.05	4	23.8606	0.0726702	23.8903	0.0589266	1.02085	0.0432419	>0.05
D3ZES7	D3ZES7_RAT	Protein Plxna4a	Plxna4a	1893	4	22.2129	0.11072	22.2754	0.0923732	1.04425	0.0694749	>0.05	4	22.6123	0.0674559	22.5796	0.0542332	0.977638	0.0351971	>0.05
D3ZF05	D3ZF05_RAT	SH3-containing GRB2-like protein 3-interacting protein 1 (Fragment)	Sgip1	855	11	26.0997	0.058738	26.0917	0.0552432	0.994497	0.0413529	>0.05
D3ZF07	D3ZF07_RAT	Protein RGD1562402	RGD1562402	148									3	22.2374	0.0638655	22.2053	0.0445364	0.978021	0.0298474	>0.05
D3ZF11	D3ZF11_RAT	Hepatitis B virus x interacting protein (Predicted), isoform CRA_a (Protein Lamtor5)	Lamtor5 Hbxip_predicted rCG_28577	156									2	20.1619	0.103013	20.1244	0.114624	0.974338	0.077402	>0.05
D3ZF13	D3ZF13_RAT	Acyl carrier protein	LOC683884 Ndufab1_predicted rCG_40178	156	7	26.3637	0.0610321	26.4552	0.0666214	1.06548	0.0494374	>0.05	6	25.1381	0.0617379	25.1596	0.0727675	1.01504	0.0523421	>0.05
D3ZF21	D3ZF21_RAT	Protein Gprin3	Gprin3	757	15	24.853	0.148024	24.7643	0.149755	0.940378	0.102533	>0.05	14	23.9906	0.124673	24.1391	0.119688	1.10836	0.101909	>0.05
D3ZF36	D3ZF36_RAT	Uncharacterized protein	0	385	2	22.4673	0.291798	22.5211	0.273561	1.03801	0.189808	>0.05
D3ZFB6	PRRT2_RAT	Proline-rich transmembrane protein 2 (Dispanin subfamily B member 3) (DSPB3)	Prrt2	344	5	25.5587	0.134411	25.5401	0.09274	0.987163	0.0639029	>0.05	4	23.1351	0.225262	22.8516	0.191599	0.821592	0.0918977	>0.05
D3ZFD0	D3ZFD0_RAT	Uncharacterized protein	Myo18a	2044									6	21.231	0.0856337	21.3335	0.15004	1.07368	0.133146	>0.05
D3ZFH7	D3ZFH7_RAT	Protein Stxbp5l	Stxbp5l	1112	2	22.0518	0.0718407	21.9757	0.0578239	0.948663	0.0361377	>0.05
D3ZFL6	D3ZFL6_RAT	Protein Mex3b	Mex3b	576	2	19.3161	0.24947	19.256	0.118047	0.959183	0.0794191	>0.05
D3ZFY8	D3ZFY8_RAT	Protein LOC100362142	LOC100912618 LOC100362142	147	5	25.6115	0.091698	25.5904	0.0984071	0.985521	0.0656845	>0.05	5	22.8326	0.0588613	22.8075	0.0388653	0.982796	0.0267458	>0.05
D3ZG43	D3ZG43_RAT	NADH dehydrogenase (Ubiquinone) Fe-S protein 3 (Predicted), isoform CRA_c (Protein Ndufs3)	Ndufs3 Ndufs3_predicted rCG_26180	264	9	28.9053	0.0953729	28.9298	0.0851812	1.01714	0.0554287	>0.05	9	26.5753	0.0366687	26.6843	0.0333418	1.07851	0.0253233	<0.05
D3ZGA5	D3ZGA5_RAT	Prickle-like protein 1 (Rab interacting lysosomal protein (Predicted))	Rilp Rilp_predicted rCG_34283	366	2	22.018	0.542387	21.724	0.480542	0.815634	0.388566	>0.05
D3ZGF8	D3ZGF8_RAT	DNA-directed RNA polymerase (EC 2.7.7.6)	Polr2a	1932	2	23.5578	0.203971	23.6952	0.328765	1.09993	0.166475	>0.05	2	20.0993	0.633166	19.4752	0.487819	0.648807	0.232735	>0.05
D3ZGJ9	D3ZGJ9_RAT	Protein Depdc1 (RCG28484, isoform CRA_a)	Depdc1 rCG_28484	809									2	21.8265	0.115732	21.8758	0.12458	1.03472	0.0964049	>0.05
D3ZGL0	D3ZGL0_RAT	GRIP1-associated protein 1	Gripap1	793	6	22.8621	0.101702	22.9147	0.0930407	1.03709	0.0653691	>0.05	8	23.3708	0.0917916	23.454	0.066095	1.05939	0.0466751	>0.05
D3ZGN2	D3ZGN2_RAT	Copine 5 protein (Copine V (Predicted)) (Protein Cpne5)	Cpne5 Cpne5_predicted rCG_60637	593	15	26.4691	0.102928	26.4959	0.0656123	1.01876	0.0448952	>0.05	13	23.7516	0.0855867	23.9197	0.0712097	1.1236	0.059466	>0.05
D3ZGQ8	D3ZGQ8_RAT	Protein Rsf1	Rsf1	1444	3	25.6697	0.0793422	25.7327	0.0670272	1.04467	0.0538979	>0.05	2	22.8547	0.0677637	22.9711	0.0856478	1.08404	0.0624444	>0.05
D3ZGY2	D3ZGY2_RAT	OTU domain containing 6B (Predicted), isoform CRA_b (Protein Otud6b)	Otud6b Otud6b_predicted rCG_55064	324	3	20.9175	0.102218	20.8267	0.120694	0.93897	0.0667148	>0.05	2	20.0021	0.090714	20.0816	0.0749971	1.05666	0.0543729	>0.05
D3ZH00	D3ZH00_RAT	Calcium-transporting ATPase (EC 3.6.3.8)	Atp2b4	1165	26	28.9314	0.0573383	28.8138	0.0862424	0.921695	0.0593202	>0.05	23	28.0667	0.0303949	28.0884	0.0443087	1.01517	0.031311	>0.05
D3ZHI9	D3ZHI9_RAT	Protein Ppp2r5e (Protein phosphatase 2, regulatory subunit B (B56), epsilon isoform (Predicted))	Ppp2r5e Ppp2r5e_predicted rCG_62385	429	5	24.0101	0.066481	23.9631	0.0531506	0.967998	0.0379099	>0.05	6	23.7369	0.0905988	23.8115	0.0651238	1.05311	0.0472634	>0.05
D3ZHV2	MACF1_RAT	Microtubule-actin cross-linking factor 1 (Actin cross-linking family 7)	Macf1 Acf7 Aclp7 Macf	5430	18	24.5367	0.0780089	24.5205	0.0440184	0.988865	0.0302125	>0.05
D3ZHX3	D3ZHX3_RAT	Protein Diras2	Diras2	199									3	21.8014	0.157306	21.7718	0.131544	0.979687	0.0849925	>0.05
D3ZHY9	D3ZHY9_RAT	Protein Rasal1 (RAS protein activator like 1 (GAP1 like) (Predicted))	Rasal1 Rasal1_predicted rCG_21923	801	4	22.7758	0.418454	22.3821	0.247441	0.761163	0.207412	>0.05	3	21.7785	0.591222	21.9551	0.795515	1.1302	1.34649	>0.05
D3ZIE5	D3ZIE5_RAT	Protein Smarca1	Smarca1	1062									2	20.0549	0.392965	20.2482	0.262056	1.14332	0.209217	>0.05
D3ZIE9	D3ZIE9_RAT	Protein Aldh18a1 (Pyrroline-5-carboxylate synthetase (Glutamate gamma-semialdehyde synthetase) (Predicted))	Aldh18a1 Pycs_predicted rCG_57763	795	4	22.9989	0.28089	23.1732	0.267034	1.12845	0.216029	>0.05
D3ZIP8	D3ZIP8_RAT	Protein Endod1 (RCG31867)	Endod1 rCG_31867	500	2	22.6663	0.0510215	22.6876	0.12262	1.01483	0.0803437	>0.05	4	21.7362	0.091986	21.8288	0.0355835	1.06628	0.0266862	>0.05
D3ZJ01	D3ZJ01_RAT	Protein RGD1307235 (Similar to RIKEN cDNA 2310035C23 (Predicted))	RGD1307235 RGD1307235_predicted rCG_24062	1218	5	22.1217	0.0919583	22.0127	0.10804	0.927235	0.0729622	>0.05	8	22.139	0.0501467	22.1722	0.0513921	1.02325	0.0365955	>0.05
D3ZJ08	D3ZJ08_RAT	Histone H3	Hist2h3c2 Hist1h2ail Hist1h2ail1 Hist1h3a Hist1h3c Hist1h3f Hist2h3c LOC102549173 LOC679994 LOC684762 LOC684819 LOC684841 rCG_45187 rCG_45215 rCG_51970	136	5	28.6666	0.238722	28.5933	0.13317	0.95047	0.0929822	>0.05	4	27.6244	0.0453781	27.4769	0.0751378	0.902813	0.0459601	>0.05
D3ZJ63	D3ZJ63_RAT	Protein Rab11fip5 (Fragment)	Rab11fip5 LOC312502	643									2	18.1435	0.175724	18.1216	0.14385	0.984921	0.0956569	>0.05
D3ZJ77	D3ZJ77_RAT	Calcium binding protein 39 (Predicted), isoform CRA_a (Protein Cab39)	Cab39 Cab39_predicted rCG_23700	196	2	21.8063	0.142939	21.5702	0.120812	0.849002	0.068631	>0.05	2	21.2096	0.0704896	21.0964	0.0608322	0.924536	0.0372547	>0.05
D3ZJH9	D3ZJH9_RAT	Malic enzyme	Me2	584	6	23.2253	0.0934672	23.7299	0.0587126	1.41866	0.029356	<0.001	6	22.1963	0.101184	22.3462	0.0921091	1.10953	0.0679788	>0.05
D3ZJJ7	D3ZJJ7_RAT	Kinesin-like protein (Fragment)	Kif21a	1559	11	24.1522	0.0490898	24.1599	0.0397496	1.0054	0.0289369	>0.05
D3ZJR1	D3ZJR1_RAT	Epidermal growth factor receptor pathway substrate 15-like 1 (Protein Eps15l1)	Eps15l1 LOC361120	878	5	23.6587	0.0414121	23.6456	0.0613016	0.990984	0.0420892	>0.05	10	23.6821	0.205811	23.5039	0.123278	0.883787	0.0767153	>0.05
D3ZJX5	D3ZJX5_RAT	Protein LOC687295 (RCG54610, isoform CRA_a)	Timm50 LOC687295 rCG_54610	353	3	22.4489	0.0985571	22.3571	0.0453031	0.938381	0.0305228	>0.05	5	21.3611	0.0461693	21.4944	0.0460036	1.09676	0.0356505	>0.05
D3ZK35	D3ZK35_RAT	Uncharacterized protein	RGD1310081	2627	2	25.4139	0.0859681	25.6163	0.100782	1.15064	0.0801229	>0.05
D3ZKB7	D3ZKB7_RAT	Protein Vprbp (Fragment)	Vprbp	1385	4	21.747	0.304325	21.8248	0.332228	1.05541	0.265724	>0.05
D3ZKQ4	D3ZKQ4_RAT	Protein Rabl6 (Putative uncharacterized protein RGD1307615_predicted)	Rabl6 RGD1307615_predicted rCG_45519	731	2	21.7469	0.0890432	21.7943	0.0846488	1.03339	0.0601389	>0.05	3	20.301	0.100288	20.2479	0.15745	0.963882	0.109158	>0.05
D3ZKV7	D3ZKV7_RAT	Protein Tnrc18	Tnrc18	2840	2	20.7945	0.276298	20.8079	0.232647	1.0093	0.151097	>0.05
D3ZKY6	D3ZKY6_RAT	Protein Ankrd63	Ankrd63	390	7	25.6526	0.150251	25.8566	0.108854	1.15191	0.091684	>0.05	6	23.0274	0.196409	23.4364	0.0824119	1.32776	0.0734512	>0.05
D3ZL49	D3ZL49_RAT	Protein Hmg1l1	Hmg1l1 LOC100909581	215									4	24.3234	0.0768311	24.1555	0.0464581	0.890137	0.0277851	>0.05
D3ZLC1	D3ZLC1_RAT	Protein Lmnb2	Lmnb2	598	5	21.9141	0.371206	21.6308	0.414648	0.821674	0.289656	>0.05
D3ZLK9	D3ZLK9_RAT	ATP-dependent (S)-NAD(P)H-hydrate dehydratase (EC 4.2.1.93) (ATP-dependent NAD(P)HX dehydratase) (Carbohydrate kinase domain-containing protein)	Carkd RGD1562691_predicted rCG_43121	327									3	20.892	0.107435	20.7382	0.138407	0.898889	0.0938943	>0.05
D3ZLS6	D3ZLS6_RAT	Protein N4bp2	N4bp2	1677	2	24.3231	0.194306	24.0499	0.210944	0.827519	0.123867	>0.05
D3ZLT1	D3ZLT1_RAT	NADH dehydrogenase (Ubiquinone) 1 beta subcomplex, 7 (Predicted) (Protein Ndufb7)	Ndufb7 Ndufb7_predicted rCG_51107	137	4	25.7718	0.0711553	25.7192	0.0722693	0.964205	0.0509451	>0.05	4	23.6284	0.0992817	23.6993	0.107151	1.05036	0.0837268	>0.05
D3ZLU0	D3ZLU0_RAT	Protein C2cd4c (RCG29198)	C2cd4c rCG_29198	422	2	20.3214	0.119879	20.188	0.124326	0.911653	0.0843458	>0.05
D3ZLY9	D3ZLY9_RAT	Histone H2B	Hist1h2bh Hist1h2bf Hist1h2bl rCG_23123	126									9	28.8164	0.0522284	28.7298	0.0636934	0.941686	0.0426374	>0.05
D3ZM05	D3ZM05_RAT	Protein Ttc14 (Tetratricopeptide repeat domain 14 (Predicted), isoform CRA_c)	Ttc14 Ttc14_predicted rCG_41567	768									2	17.649	0.793442	17.4973	0.422146	0.900183	0.416236	>0.05
D3ZM21	D3ZM21_RAT	Catechol-O-methyltransferase domain containing 1 (Predicted), isoform CRA_a (Protein Comtd1)	Comtd1 Comtd1_predicted rCG_41841	262	3	22.8634	0.0581387	22.9375	0.084559	1.05264	0.0694101	>0.05	2	21.3094	0.101362	21.2487	0.0727532	0.958813	0.0472654	>0.05
D3ZM33	D3ZM33_RAT	Protein LOC100362298 (Fragment)	LOC100362298	154	6	24.5882	0.0854582	24.4228	0.0723772	0.891706	0.0510466	>0.05
D3ZM62	D3ZM62_RAT	Tripartite motif-containing protein 2 (Fragment)	Trim2	761	8	24.7063	0.0516528	24.7721	0.0513848	1.04667	0.0372619	>0.05
D3ZMJ7	D3ZMJ7_RAT	Protein Wnk2	Wnk2	2063									4	20.3673	0.0553919	20.3488	0.137676	0.987266	0.0925559	>0.05
D3ZML2	BRSK2_RAT	Serine/threonine-protein kinase BRSK2 (EC 2.7.11.1) (EC 2.7.11.26) (Brain-specific serine/threonine-protein kinase 2) (BR serine/threonine-protein kinase 2) (Serine/threonine-protein kinase SAD-A)	Brsk2 Sada	735									3	20.6982	0.0659288	20.6531	0.0653705	0.969206	0.0432563	>0.05
D3ZMR0	D3ZMR0_RAT	Olfactomedin-like 2A (Predicted) (Protein Olfml2a)	Olfml2a Olfml2a_predicted rCG_37680	621									3	20.0309	0.0938704	20.1358	0.076958	1.07541	0.0567385	>0.05
D3ZMV4	D3ZMV4_RAT	Protein Dtna	Dtna	570									3	19.9697	0.110622	19.9917	0.0525784	1.0154	0.0373675	>0.05
D3ZN21	D3ZN21_RAT	Protein Ddx3y (RCG20177)	Ddx3y RGD1309586 rCG_20177	659	6	22.8579	0.098595	22.8918	0.0725175	1.0238	0.055793	>0.05	4	22.2434	0.0716092	22.271	0.0576982	1.01935	0.0409585	>0.05
D3ZNK1	D3ZNK1_RAT	Protein Mtx3	Mtx3 LOC688905	311	2	22.1077	0.0901906	21.9632	0.0635597	0.904673	0.0381213	>0.05	3	19.7195	0.0872286	19.9037	0.0893405	1.13615	0.0733201	>0.05
D3ZNN0	D3ZNN0_RAT	Protein Sbf1	Sbf1	1867	7	23.0288	0.0285789	22.9661	0.0473409	0.957467	0.0321765	>0.05	6	21.6311	0.076679	21.6316	0.0739796	1.00037	0.0534784	>0.05
D3ZNQ6	D3ZNQ6_RAT	Protein Ube2m (Ubiquitin-conjugating enzyme E2M (UBC12 homolog, yeast) (Predicted), isoform CRA_a)	Ube2m Ube2m_predicted rCG_27455	183	4	23.2948	0.0674093	23.2966	0.054192	1.00122	0.0373717	>0.05	3	20.594	0.148335	20.6347	0.115564	1.02862	0.0898842	>0.05
D3ZP34	D3ZP34_RAT	Protein Daam2	Daam2	1083									2	21.258	0.134518	21.3473	0.194379	1.06385	0.154046	>0.05
D3ZP47	D3ZP47_RAT	Phosphohistidine phosphatase 1 (Predicted), isoform CRA_a (Protein Phpt1)	Phpt1 Phpt1_predicted rCG_45807	124	4	24.137	0.0747361	24.024	0.063882	0.924692	0.0405919	>0.05	5	22.3347	0.0612987	22.3411	0.0646853	1.00449	0.0445799	>0.05
D3ZPA1	D3ZPA1_RAT	Protein Gcc1 (RCG28300)	Gcc1 rCG_28300	778									2	23.4396	0.0708555	23.4891	0.054029	1.03487	0.0380184	>0.05
D3ZPC4	D3ZPC4_RAT	Neural cell adhesion molecule L1	L1cam	1255	14	26.0626	0.0354451	26.0214	0.0587142	0.971853	0.0401279	>0.05	13	24.9953	0.063856	25.1564	0.0751118	1.11816	0.0580369	>0.05
D3ZPI4	D3ZPI4_RAT	GTPase activating RANGAP domain-like 4 (Predicted), isoform CRA_a (Protein Rap1gap2)	Rap1gap2 Garnl4_predicted rCG_32537	410	3	22.0856	0.499947	21.5066	0.351678	0.669411	0.230253	>0.05
D3ZPJ0	D3ZPJ0_RAT	Protein Shisa7	Shisa7	558	5	23.3097	0.284058	23.0483	0.225056	0.834253	0.147591	>0.05	3	20.9536	0.0666125	20.9083	0.0462626	0.969058	0.0315634	>0.05
D3ZPL5	D3ZPL5_RAT	Protein LOC100361311	RGD1562953 LOC100361311	266	7	25.891	0.103645	25.9824	0.0994845	1.06542	0.0701971	>0.05	7	23.4884	0.0499797	23.4559	0.0475316	0.97773	0.0319732	>0.05
D3ZPP2	D3ZPP2_RAT	Protein Arl8a (Similar to ADP-ribosylation factor-like 10B (Predicted))	Arl8a RGD1565940_predicted rCG_46487	186									4	24.5482	0.0822571	24.5887	0.0824433	1.02844	0.0537001	>0.05
D3ZPR0	D3ZPR0_RAT	Chromosome segregation 1-like (S. cerevisiae) (Predicted) (Protein Cse1l)	Cse1l Cse1l_predicted rCG_32309	971	3	19.7924	0.283917	19.3877	0.178331	0.755387	0.09779	>0.05
D3ZPU3	D3ZPU3_RAT	Estradiol 17-beta-dehydrogenase 12	Hsd17b12	290	5	21.9072	0.151888	22.1124	0.0598904	1.15279	0.0471847	>0.05	4	21.275	0.0814756	21.327	0.0545086	1.03671	0.038075	>0.05
D3ZQD3	D3ZQD3_RAT	2-oxoglutarate dehydrogenase, mitochondrial (Oxoglutarate dehydrogenase-like (Predicted), isoform CRA_a)	Ogdhl Ogdhl_predicted rCG_42296	1029	12	25.8913	0.0564226	25.8994	0.0621892	1.00559	0.0437544	>0.05	9	23.6868	0.0784144	23.7061	0.069584	1.01345	0.0487787	>0.05
D3ZQG6	TRIM2_RAT	Tripartite motif-containing protein 2 (EC 6.3.2.-) (E3 ubiquitin-protein ligase TRIM2)	Trim2	744									8	24.8303	0.14103	24.9694	0.123983	1.10123	0.0880543	>0.05
D3ZQI3	D3ZQI3_RAT	Protein Abca16	Abca16	1614	2	21.8735	0.105041	22.0216	0.0970814	1.10817	0.0740612	>0.05
D3ZQL7	D3ZQL7_RAT	Protein Tppp (Similar to 25 kDa brain-specific protein (P25-alpha) (Predicted), isoform CRA_a)	Tppp RGD1310121_predicted rCG_42002	218	7	29.3304	0.0453058	29.3266	0.0535194	0.997411	0.0388929	>0.05	6	28.3203	0.0570319	28.3168	0.0482673	0.997597	0.0338463	>0.05
D3ZQN3	D3ZQN3_RAT	Protein Pnmal2 (Similar to KIAA1183 protein (Predicted))	Pnmal2 RGD1560435_predicted rCG_54370	667									2	18.1993	0.242963	18.0364	0.221594	0.893285	0.128396	>0.05
D3ZQP6	D3ZQP6_RAT	Protein Sema7a (Sema domain, immunoglobulin domain (Ig), and GPI membrane anchor, (Semaphorin) 7A (Predicted))	Sema7a Sema7a_predicted rCG_57846	666									2	19.6198	0.312654	19.8094	0.40692	1.14043	0.400824	>0.05
D3ZQR3	D3ZQR3_RAT	Protein Arpp21	Arpp21	808	3	23.3854	0.199549	23.33	0.143694	0.962341	0.107445	>0.05	3	20.7461	0.164022	21.0037	0.103631	1.19546	0.0798793	>0.05
D3ZR34	D3ZR34_RAT	Protein Psd3 (Fragment)	Psd3	1039									10	23.5968	0.126812	23.4118	0.0760869	0.879632	0.0493548	>0.05
D3ZRM9	D3ZRM9_RAT	60S ribosomal protein L13	LOC100360491	211	3	23.8309	0.146504	23.6817	0.0935154	0.901739	0.0706191	>0.05
D3ZRN3	D3ZRN3_RAT	Protein Actbl2 (Similar to cytoplasmic beta-actin (Predicted))	Actbl2 RGD1309504_predicted rCG_44795	376	12	31.7354	0.0333283	31.7947	0.037538	1.04197	0.0270219	>0.05	12	30.9192	0.0323862	30.9621	0.0388422	1.03015	0.0282434	>0.05
D3ZRX4	D3ZRX4_RAT	Microtubule-associated protein	Mapt	498	20	29.7707	0.0327534	29.7367	0.0451049	0.976726	0.0314286	>0.05	18	28.7798	0.0484387	28.6632	0.0438728	0.92236	0.0277319	>0.05
D3ZS31	D3ZS31_RAT	Lethal(2) giant larvae protein homolog 1 (Ral guanine nucleotide dissociation stimulator,-like 1 (Predicted), isoform CRA_a)	Rgl1 Rgl1_predicted rCG_46416	672									2	20.6515	0.0938755	20.7748	0.0742761	1.08918	0.059611	>0.05
D3ZS58	D3ZS58_RAT	NADH dehydrogenase [ubiquinone] 1 alpha subcomplex subunit 2	Ndufa2 Ndufa2_predicted rCG_49583	97	4	26.0115	0.0660275	26.104	0.0457814	1.06622	0.0342628	>0.05	4	25.2522	0.0450102	25.2905	0.0351699	1.02692	0.0243225	>0.05
D3ZSF4	D3ZSF4_RAT	Protein Col13a1	Col13a1	739									2	18.2658	0.157351	18.3926	0.0988505	1.09185	0.0748826	>0.05
D3ZSG0	D3ZSG0_RAT	Protein LOC100910054	LOC100910054 Nkrf	553									2	19.77	0.070992	19.9304	0.060833	1.11763	0.0458084	>0.05
D3ZSN6	D3ZSN6_RAT	Kinesin-like protein (Fragment)	Kif21a	1614									10	23.5564	0.0603973	23.6314	0.0664545	1.05336	0.0488214	>0.05
D3ZSY8	D3ZSY8_RAT	Protein Tbc1d10b (TBC1 domain family, member 10b (Predicted))	Tbc1d10b Tbc1d10b_predicted rCG_40210	795	4	23.1219	0.0808273	23.0434	0.0670565	0.947076	0.0448642	>0.05	5	21.7551	0.0959969	21.797	0.109845	1.02946	0.0791041	>0.05
D3ZT16	D3ZT16_RAT	Protein Map6d1 (Putative uncharacterized protein RGD1560102_predicted)	Map6d1 RGD1560102_predicted rCG_36606	191									3	21.7913	0.0900315	21.6521	0.0631368	0.907994	0.0395632	>0.05
D3ZT20	D3ZT20_RAT	Protein Fbxo41	Fbxo41	870									2	18.0222	0.166875	17.8601	0.175244	0.893687	0.104244	>0.05
D3ZT36	D3ZT36_RAT	Protein Adam23	Adam23	828	3	23.4223	0.0423846	23.4783	0.0764151	1.03964	0.0531438	>0.05	4	21.5149	0.10174	21.5416	0.102122	1.01867	0.0667417	>0.05
D3ZTB5	D3ZTB5_RAT	Protein S100a13	S100a13	98	2	23.6881	0.128131	23.4312	0.0248757	0.836891	0.0148579	>0.05	2	22.7934	0.125063	22.4977	0.0558092	0.814633	0.0318797	<0.05
D3ZTM2	D3ZTM2_RAT	Protein Ino80d	Ino80d	1021									3	18.6454	0.199236	18.506	0.206257	0.907897	0.143171	>0.05
D3ZTR5	D3ZTR5_RAT	Protein Zbed5 (RCG21454)	Zbed5 rCG_21454	757		21.5198	0.182117	21.6005	0.185832	1.05759	0.139851	>0.05		21.2784	0.19032	21.2692	0.240579	0.993657	0.233472	>0.05
D3ZTW9	D3ZTW9_RAT	Endonuclease G-like 1 (Predicted), isoform CRA_d (Protein Exog)	Exog Endogl1_predicted rCG_25458	368	5	23.9541	0.325123	23.5678	0.326228	0.765067	0.20254	>0.05	2	20.6393	0.0681028	20.771	0.0548605	1.0956	0.0387532	>0.05
D3ZU13	D3ZU13_RAT	Protein Eif4g1	LOC100911431 Eif4g1	1598	4	21.7388	0.209178	21.7086	0.146196	0.979293	0.112475	>0.05
D3ZU84	D3ZU84_RAT	Protein Stxbp5l	Stxbp5l	1136									3	22.8188	0.411255	22.9839	0.316314	1.1213	0.196729	>0.05
D3ZUB0	D3ZUB0_RAT	Protein Rcn1 (Reticulocalbin 1 (Predicted), isoform CRA_a)	Rcn1 Rcn1_predicted rCG_26388	325	5	23.8753	0.305727	24.0864	0.210785	1.15753	0.163766	>0.05	6	21.8953	0.109766	22.0965	0.141909	1.14966	0.124767	>0.05
D3ZUD0	D3ZUD0_RAT	Protein Ect2	Ect2	912	2	19.7968	0.300727	19.8926	0.292506	1.06864	0.178076	>0.05
D3ZUF9	D3ZUF9_RAT	Pitrilysin metallepetidase 1 (Predicted) (Protein Pitrm1)	Pitrm1 Pitrm1_predicted rCG_55712	954	2	17.7787	0.43505	17.5741	0.241738	0.86773	0.15738	>0.05
D3ZUP5	D3ZUP5_RAT	Protein Brk1 (RCG56448, isoform CRA_a)	Brk1 rCG_56448	75	2	22.7297	0.0941152	22.6411	0.073657	0.940461	0.0504961	>0.05	3	22.3712	0.0856268	22.3427	0.0471529	0.980485	0.0331061	>0.05
D3ZUX5	D3ZUX5_RAT	Coiled-coil-helix-coiled-coil-helix domain containing 3 (Predicted), isoform CRA_a (Protein Chchd3)	Chchd3 Chchd3_predicted rCG_28180	227	6	25.127	0.0686555	25.1294	0.0723863	1.00169	0.0483672	>0.05	6	24.4779	0.0273428	24.5105	0.037853	1.02283	0.0266198	>0.05
D3ZUY8	D3ZUY8_RAT	Adaptor protein complex AP-2, alpha 1 subunit (Predicted) (Protein Ap2a1)	Ap2a1 Ap2a1_predicted rCG_54084	977	33	28.603	0.052763	28.5449	0.0496113	0.960581	0.0336761	>0.05	32	27.5528	0.055531	27.5031	0.0510245	0.966087	0.033571	>0.05
D3ZVE0	D3ZVE0_RAT	Protein Zfp407	Zfp407	1615									2	20.9244	0.0986764	21.0359	0.243195	1.0803	0.275022	>0.05
D3ZVQ0	D3ZVQ0_RAT	Ubiquitin carboxyl-terminal hydrolase (EC 3.4.19.12)	Usp5 LOC100911959 Usp5_predicted rCG_29800	858	17	27.3391	0.0703104	27.6689	0.0387087	1.2569	0.0286738	<0.001	22	26.1981	0.0532372	26.2954	0.023011	1.0697	0.0172981	>0.05
D3ZW08	D3ZW08_RAT	Adenylosuccinate lyase (ASL) (EC 4.3.2.2) (Adenylosuccinase)	Adsl Adsl_predicted rCG_60301	484	12	24.8496	0.0555524	24.8831	0.0488169	1.02344	0.0341229	>0.05	10	23.0868	0.0440256	23.1803	0.0267734	1.06698	0.0203174	>0.05
D3ZW55	ITPA_RAT	Inosine triphosphate pyrophosphatase (ITPase) (Inosine triphosphatase) (EC 3.6.1.19) (Non-canonical purine NTP pyrophosphatase) (Non-standard purine NTP pyrophosphatase) (Nucleoside-triphosphate diphosphatase) (Nucleoside-triphosphate pyrophosphatase) (NTPase)	Itpa	198	8	25.678	0.139509	25.5041	0.211909	0.886469	0.0994196	>0.05	6	24.0326	0.148886	24.3128	0.129581	1.21438	0.114341	>0.05
D3ZWA8	D3ZWA8_RAT	Protein Appl1 (Fragment)	Appl1	690	4	21.9958	0.134251	21.8393	0.127176	0.897226	0.0786746	>0.05	2	20.2294	0.171354	20.235	0.12243	1.00389	0.0893317	>0.05
D3ZWQ0	D3ZWQ0_RAT	Protein Prrt3	Prrt3	974	4	23.4395	0.136811	23.2237	0.103778	0.861022	0.0597299	>0.05	4	22.0215	0.0811222	21.9202	0.0591235	0.932191	0.0377422	>0.05
D3ZWW3	D3ZWW3_RAT	Protein Rasal3 (Similar to Ras GTPase-activating protein nGAP (RAS protein activator like 1) (Predicted))	Rasal3 RGD1309019_predicted rCG_29259	1015									2	17.3173	0.634364	17.2907	0.782042	0.981741	1.7222	>0.05
D3ZX42	D3ZX42_RAT	G protein-coupled receptor 21 (Predicted), isoform CRA_a (Protein Rabgap1)	Rabgap1 Gpr21_predicted rCG_37682	1065	3	24.4991	0.419841	24.4802	0.462809	0.986938	0.368097	>0.05
D3ZX82	D3ZX82_RAT	Cytoplasmic FMR1 interacting protein 2 (Predicted) (Protein Cyfip2)	Cyfip2 Cyfip2_predicted rCG_35313	593	8	25.993	0.0711375	26.1016	0.0767747	1.0782	0.0585414	>0.05	9	24.7298	0.0472482	24.7233	0.021681	0.995501	0.0149136	>0.05
D3ZXF9	D3ZXF9_RAT	Protein Mrpl12	Mrpl12	276	4	22.9125	0.239291	23.267	0.246861	1.27858	0.286274	>0.05	3	20.6467	0.0974081	20.6775	0.0841352	1.02161	0.062405	>0.05
D3ZXK4	D3ZXK4_RAT	Protein Abhd11	Abhd11 Abhd11l1	307	3	21.3814	0.087807	21.3459	0.039775	0.975652	0.0268914	>0.05	2	19.6626	0.0716257	19.483	0.147859	0.882921	0.0836521	>0.05
D3ZXN9	D3ZXN9_RAT	Nuclear receptor co-repressor 2 (Predicted), isoform CRA_a (Protein Ncor2)	Ncor2 Ncor2_predicted rCG_21882	2472	3	20.1447	0.170994	20.2367	0.13462	1.06583	0.0921735	>0.05
D3ZXS8	D3ZXS8_RAT	Huntingtin interacting protein 2 (Predicted), isoform CRA_a (Protein Ube2k)	Ube2k Hip2_predicted rCG_56935	200	2	22.3751	0.185528	22.4011	0.175082	1.01822	0.125709	>0.05	3	21.2517	0.0640323	21.2958	0.0676983	1.03103	0.0482956	>0.05
D3ZY46	D3ZY46_RAT	Engulfment and cell motility 1, ced-12 homolog (C. elegans) (Predicted), isoform CRA_a (Protein Elmo1)	Elmo1 Elmo1_predicted rCG_23103	727	4	21.8775	0.102837	21.7939	0.110373	0.943705	0.0722194	>0.05	3	21.5153	0.0347071	21.6562	0.0901816	1.10257	0.0730225	>0.05
D3ZY47	D3ZY47_RAT	Protein RGD1559896 (Similar to RIKEN cDNA 2310022B05 (Predicted))	RGD1559896 RGD1559896_predicted rCG_50878	324									3	20.2459	0.118212	20.3295	0.0873383	1.0597	0.0606322	>0.05
D3ZYH3	D3ZYH3_RAT	Protein LOC100912928 (RCG22822)	LOC100912928 Nudt10 Nudt11 rCG_22822	164	3	25.9854	0.384538	26.6967	0.275569	1.63725	0.235654	>0.05
D3ZYR0	D3ZYR0_RAT	Protein Arhgef12	Arhgef12	1414	2	18.6313	0.165084	18.811	0.155912	1.13271	0.127699	>0.05
D3ZYS7	D3ZYS7_RAT	Protein G3bp1	G3bp1	465									2	24.3908	0.17503	24.4	0.331379	1.00637	0.234217	>0.05
D3ZYX5	D3ZYX5_RAT	Protein Myo6	Myo6	1258									3	20.784	0.317057	20.9041	0.220444	1.08683	0.13975	>0.05
D3ZYY0	D3ZYY0_RAT	Protein Sdr39u1 (Similar to HCDI protein (Predicted), isoform CRA_a)	Sdr39u1 RGD1309307_predicted rCG_23395	298	2	21.5014	0.0970186	21.5776	0.0546988	1.05423	0.0422235	>0.05
D3ZZ21	D3ZZ21_RAT	NADH dehydrogenase (Ubiquinone) 1 beta subcomplex, 6 (Predicted) (Protein Ndufb6)	Ndufb6 Ndufb6_predicted rCG_55056	128	3	25.1628	0.151893	25.3764	0.0940577	1.15961	0.0644257	>0.05	2	24.031	0.203992	24.1035	0.241535	1.05153	0.18106	>0.05
D3ZZ47	D3ZZ47_RAT	Potassium voltage-gated channel subfamily KQT member 2	Kcnq2	860									3	22.0074	0.0930448	22.0806	0.083415	1.05208	0.0591761	>0.05
D3ZZA8	D3ZZA8_RAT	Protein Sec24a (SEC24 related gene family, member A (S. cerevisiae) (Predicted))	Sec24a Sec24a_predicted rCG_33999	1089									2	20.8187	0.282028	20.9482	0.248285	1.09391	0.203551	>0.05
D3ZZK3	D3ZZK3_RAT	Receptor protein-tyrosine kinase (EC 2.7.10.1)	Epha4	986	9	23.6749	0.0612247	23.5853	0.0585221	0.939744	0.0370333	>0.05	6	22.5751	0.053292	22.6367	0.0777013	1.04359	0.0572969	>0.05
D3ZZK7	D3ZZK7_RAT	Protein Myo3a (Fragment)	Myo3a	1621									2	18.8176	0.0969879	19.1003	0.0778639	1.21646	0.0650314	<0.05
D3ZZM9	D3ZZM9_RAT	Protein Ccsap (Similar to 1700054N08Rik protein (Predicted))	Ccsap RGD1563235_predicted rCG_50909	252									2	20.227	0.22439	20.2994	0.196834	1.05145	0.141407	>0.05
D3ZZQ0	D3ZZQ0_RAT	Protein Tnik (Similar to Traf2 and NCK interacting kinase, splice variant 4 (Predicted), isoform CRA_a)	Tnik RGD1561817_predicted rCG_41596	1354	3	21.6721	0.0306749	21.6377	0.0532327	0.976416	0.0371808	>0.05
D3ZZR9	D3ZZR9_RAT	Peptidyl-prolyl cis-trans isomerase	Fkbp2 Fkbp2_predicted rCG_47860	140	4	23.3071	0.0783578	23.2799	0.0598522	0.981301	0.0408852	>0.05
D3ZZU8	D3ZZU8_RAT	Protein Fn3k (Similar to fructosamine-3-kinase (Predicted), isoform CRA_a)	Fn3k Fnsk_predicted rCG_32456	203	2	19.7742	0.236314	15.1942	2.50755	0.0418113	0.154331	>0.05
D3ZZY2	D3ZZY2_RAT	Protein Utp14a	Utp14a	764									2	23.6091	0.0770809	23.5895	0.122566	0.986537	0.100221	>0.05
D3ZZY7	D3ZZY7_RAT	Protein Kansl1l	Kansl1l	990	2	21.1629	0.211161	21.6099	0.210959	1.36324	0.184526	>0.05
D4A055	D4A055_RAT	Calcium channel, voltage-dependent, beta 4 subunit, isoform CRA_b (Protein Cacnb4)	Cacnb4 rCG_37774	486	3	23.1782	0.187452	23.4082	0.117076	1.17285	0.0830033	>0.05
D4A0A1	D4A0A1_RAT	Protein LOC100363248	Soga3 LOC100363248	944	6	23.047	0.189458	23.0222	0.217663	0.982969	0.154053	>0.05	6	21.4087	0.112845	21.4214	0.095141	1.00884	0.069176	>0.05
D4A0B4	D4A0B4_RAT	Protein Ankrd17 (Similar to ankyrin repeat domain protein 17 isoform b (Predicted), isoform CRA_a)	Ankrd17 RGD1562348_predicted rCG_60525	2358									2	19.866	0.0915785	19.8053	0.0964044	0.958783	0.0635285	>0.05
D4A0E2	D4A0E2_RAT	Protein Napg (RCG46917, isoform CRA_b)	Napg rCG_46917	230	9	26.6028	0.0456727	26.6055	0.0609886	1.00193	0.0413837	>0.05	8	25.6948	0.0506244	25.7478	0.0762208	1.03744	0.0555036	>0.05
D4A0E8	D4A0E8_RAT	Protein arginine N-methyltransferase 5 (EC 2.1.1.-)	Prmt5 Prmt5_predicted rCG_23370	637	4	22.7132	0.16932	22.7812	0.0657471	1.0483	0.0482476	>0.05
D4A0I5	D4A0I5_RAT	DnaJ (Hsp40) homolog, subfamily C, member 6 (Predicted) (Protein Dnajc6)	Dnajc6 Dnajc6_predicted rCG_53429	911	14	25.6176	0.0842905	25.5343	0.0694053	0.943865	0.0458831	>0.05	14	24.2332	0.0386233	24.1983	0.0469648	0.976112	0.0325944	>0.05
D4A0J4	D4A0J4_RAT	Protein Vwa2	Vwa2 Vwa2-ps1	715	2	26.4857	0.20094	26.5488	0.165049	1.04473	0.131774	>0.05
D4A0J7	D4A0J7_RAT	Olfactomedin-like 2B (Predicted), isoform CRA_a (Protein Olfml2b)	Olfml2b Olfml2b_predicted rCG_45943	746	2	13.9327	2.74996	16.6208	2.20659	6.44429	3.81537	>0.05
D4A0T0	D4A0T0_RAT	Protein Ndufb10 (RCG32945)	Ndufb10 rCG_32945	176	7	27.2568	0.0586717	27.319	0.0512191	1.04409	0.0361918	>0.05	8	26.1776	0.0571455	26.1977	0.0586626	1.01403	0.0459353	>0.05
D4A0X3	D4A0X3_RAT	Protein Btbd8	Btbd8 LOC100364240	1367	6	22.9332	0.131817	22.7092	0.0628665	0.856161	0.0409768	>0.05	7	24.1099	0.1712	24.0932	0.137352	0.988466	0.0976269	>0.05
D4A0Y6	D4A0Y6_RAT	Uncharacterized protein	Mki67	3164									6	23.1273	0.0512457	23.1529	0.0945866	1.01788	0.0635904	>0.05
D4A106	D4A106_RAT	Protein Wdr3 (WD repeat domain 3 (Predicted), isoform CRA_c)	Wdr3 Wdr3_predicted rCG_52071	942	2	22.9611	0.0683516	22.8847	0.065793	0.948456	0.042474	>0.05
D4A133	D4A133_RAT	Protein Atp6v1a (RCG52629)	Atp6v1a rCG_52629	617	35	30.6428	0.0341127	30.6831	0.0152726	1.02827	0.0109818	>0.05	34	29.2894	0.0404507	29.3197	0.0450999	1.02123	0.0324647	>0.05
D4A1B8	D4A1B8_RAT	Protein Dctn3 (RCG55152, isoform CRA_a)	Dctn3 rCG_55152	186	3	21.0629	0.109017	20.8631	0.0929076	0.870634	0.0599134	>0.05	3	20.6922	0.0629128	20.63	0.0971599	0.95775	0.0681133	>0.05
D4A1D1	D4A1D1_RAT	Protein Strip2	Strip2	657	4	22.8763	0.107866	22.9835	0.105096	1.07711	0.0793334	>0.05
D4A1F2	MICA2_RAT	Protein-methionine sulfoxide oxidase MICAL2 (EC 1.14.13.-) (Molecule interacting with CasL protein 2) (MICAL-2)	Mical2	961	3	22.7375	0.142912	22.6664	0.0916687	0.95191	0.0630554	>0.05
D4A1G1	D4A1G1_RAT	Acylphosphatase (EC 3.6.1.7)	Acyp2 rCG_23240	124	3	23.7321	0.163538	23.7037	0.130952	0.98051	0.0917538	>0.05	4	21.9927	0.117476	21.8257	0.0676781	0.890651	0.0377821	>0.05
D4A1G8	D4A1G8_RAT	Protein Cep170b	Cep170b	1575	4	21.9511	0.0962743	21.951	0.0568663	0.999947	0.0421201	>0.05	6	21.5009	0.0788204	21.4742	0.0723791	0.9817	0.0516491	>0.05
D4A1M2	D4A1M2_RAT	Protein Vps13b	Vps13b	3995									5	21.3523	0.158433	21.4099	0.179828	1.04073	0.134593	>0.05
D4A1P2	D4A1P2_RAT	Protein Rpl10l	Rpl10l	214	3	23.1632	0.342254	23.4512	0.256103	1.22093	0.213344	>0.05
D4A1R0	D4A1R0_RAT	Protein Dhx37	Dhx37	1150									2	18.3738	0.470043	16.9083	1.43684	0.362123	0.277277	>0.05
D4A1Z4	D4A1Z4_RAT	Protein Gtf3c2	Gtf3c2	953									2	23.9264	0.192881	23.9039	0.112579	0.98454	0.0868681	>0.05
D4A2G9	D4A2G9_RAT	Protein RGD1565297 (RCG36598)	Ranbp1 RGD1565297 rCG_36598	203	3	24.3484	0.064508	24.3374	0.0346318	0.992397	0.0241131	>0.05	3	23.0452	0.0520512	23.1587	0.0395369	1.08186	0.0286431	>0.05
D4A2L1	D4A2L1_RAT	RIMS-binding protein 2	Rimbp2	1076									3	19.1415	0.136208	19.2792	0.159131	1.10018	0.0907376	>0.05
D4A2Q3	D4A2Q3_RAT	Protein Psd3 (Fragment)	Psd3	1037	10	24.6112	0.15231	24.5174	0.187153	0.937029	0.154291	>0.05
D4A383	D4A383_RAT	Protein tweety homolog	Ttyh3 Ttyh3_predicted rCG_42816	524	2	21.6939	0.135507	21.8165	0.040067	1.08873	0.0287043	>0.05	4	20.3769	0.148169	20.3777	0.134977	1.00054	0.0968598	>0.05
D4A3C2	D4A3C2_RAT	Protein RGD1304884 (Similar to RIKEN cDNA 6430548M08 (Predicted), isoform CRA_b)	RGD1304884 RGD1304884_predicted rCG_51327	407	4	24.2296	0.125436	24.1665	0.13622	0.957189	0.0987388	>0.05	5	23.2841	0.11246	23.1719	0.0908085	0.925152	0.0591736	>0.05
D4A3D9	D4A3D9_RAT	Protein Stk32c (Serine/threonine kinase 32C (Predicted))	Stk32c Stk32c_predicted rCG_47729	488	3	21.4261	0.075894	21.4336	0.0636073	1.00523	0.0449711	>0.05	4	21.4564	0.0882153	21.5745	0.0612905	1.0853	0.0478249	>0.05
D4A3S6	D4A3S6_RAT	Protein Mtss1l (Fragment)	Mtss1l	693	3	22.2243	0.153917	22.3821	0.125918	1.11562	0.0970006	>0.05
D4A3U5	D4A3U5_RAT	Protein Zfhx4	Zfhx4	3593	4	24.2858	0.193141	24.4995	0.102353	1.15965	0.0833817	>0.05
D4A3V2	D4A3V2_RAT	NADH dehydrogenase [ubiquinone] 1 alpha subcomplex subunit 6	Ndufa6 Ndufa6_predicted rCG_59408	130	3	25.5739	0.146874	25.7459	0.128048	1.12667	0.0952756	>0.05	3	24.6316	0.0579581	24.6362	0.0397521	1.00321	0.0274984	>0.05
D4A3V4	D4A3V4_RAT	Protein RGD1307500 (Fragment)	RGD1307500	633									2	19.5533	0.0896635	19.5627	0.0575206	1.00653	0.039626	>0.05
D4A435	D4A435_RAT	Protein Icam5 (RCG31795)	Icam5 rCG_31795	917	13	26.3173	0.0506595	26.3255	0.0505599	1.00566	0.0350539	>0.05	14	25.0711	0.149389	25.1735	0.0588731	1.07361	0.0418934	>0.05
D4A4B0	D4A4B0_RAT	Uncharacterized protein (Fragment)	0	5184									4	22.9939	0.115291	22.908	0.0840363	0.942239	0.0531105	>0.05
D4A4D5	D4A4D5_RAT	Protein LOC100362751	LOC498555 LOC100362751	115									4	25.7188	0.0778436	25.5814	0.0576083	0.909189	0.0368256	>0.05
D4A4P3	D4A4P3_RAT	Protein LOC100361144 (RCG22355)	LOC100361144 rCG_22355	99	2	24.1423	0.067798	24.0957	0.0332634	0.968226	0.0224091	>0.05	2	23.4919	0.0797393	23.4162	0.0763659	0.948887	0.0503119	>0.05
D4A4Q4	D4A4Q4_RAT	Protein Ociad2	Ociad2	128	2	21.557	0.381859	22.0896	0.181836	1.44657	0.131072	>0.05
D4A4T9	CHRD1_RAT	Cysteine and histidine-rich domain-containing protein 1 (CHORD domain-containing protein 1) (CHP-1) (Morgana)	Chordc1	331	8	25.5091	0.0610396	25.5872	0.0475747	1.05563	0.0359377	>0.05	6	24.0476	0.0894632	24.0786	0.0589745	1.02174	0.0406636	>0.05
D4A4U3	D4A4U3_RAT	Protein Mdp1 (Similar to magnesium-dependent phosphatase-1 (Predicted), isoform CRA_b)	Mdp1 RGD1311147_predicted rCG_23552	164	2	21.5957	0.0657971	21.5344	0.037966	0.958405	0.0258505	>0.05
D4A565	D4A565_RAT	NADH dehydrogenase (Ubiquinone) 1 beta subcomplex, 5 (Predicted), isoform CRA_b (Protein Ndufb5)	Ndufb5 Ndufb5_predicted rCG_41492	189	5	25.8571	0.0637227	25.9033	0.0518929	1.03258	0.0380519	>0.05	4	25.009	0.100791	25.1877	0.0483412	1.13189	0.0376727	>0.05
D4A589	D4A589_RAT	Protein Smg6	Smg6	1013	3	21.066	0.097684	20.8357	0.10577	0.852454	0.072416	>0.05
D4A5J1	D4A5J1_RAT	Protein Kbtbd11 (Similar to mKIAA0711 protein (Predicted))	Kbtbd11 RGD1563576_predicted rCG_43213	633									2	19.9292	0.114723	19.9682	0.248745	1.02739	0.202583	>0.05
D4A5X7	D4A5X7_RAT	Ganglioside-induced differentiation-associated-protein 1 (Predicted) (Protein Gdap1)	Gdap1 Gdap1_predicted rCG_30362	358	6	25.2145	0.0651662	25.1693	0.0511434	0.969191	0.0338933	>0.05	4	23.4753	0.133111	23.5449	0.125189	1.0494	0.0918586	>0.05
D4A5X8	D4A5X8_RAT	Protein Ahcyl1 (S-adenosylhomocysteine hydrolase-like 1 (Predicted))	Ahcyl1 Ahcyl1_predicted rCG_28904	475	6	25.6347	0.0760642	25.6023	0.0994382	0.977789	0.0776081	>0.05
D4A644	D4A644_RAT	Protein Map7d1 (RCG31495)	Map7d1 rCG_31495	817	2	21.3506	0.115223	21.2734	0.102584	0.94792	0.0732377	>0.05	3	20.7311	0.118001	20.6985	0.0878893	0.977643	0.0602076	>0.05
D4A6C5	D4A6C5_RAT	Protein Arhgap1	Arhgap1	439	6	23.8862	0.172311	23.9925	0.218781	1.07648	0.199649	>0.05	6	22.8486	0.0489062	22.7644	0.0602795	0.943277	0.0408855	>0.05
D4A6C9	D4A6C9_RAT	Protein Tom1l2 (Target of myb1-like 2 (Chicken) (Predicted), isoform CRA_a)	Tom1l2 Tom1l2_predicted rCG_33818	284	4	22.8078	0.158324	22.7754	0.106804	0.977791	0.0747899	>0.05	3	21.9026	0.0992741	21.8411	0.0800874	0.958204	0.0537456	>0.05
D4A6H8	D4A6H8_RAT	Protein Ctnna2 (Fragment)	Ctnna2	922	17	25.8896	0.0422978	25.8989	0.0460957	1.00649	0.0313418	>0.05	15	24.6586	0.0404342	24.7044	0.0290647	1.03225	0.0216064	>0.05
D4A6K5	D4A6K5_RAT	Interleukin 27 receptor, alpha (Predicted) (Protein Il27ra)	Il27ra Il27ra_predicted rCG_51428	549									3	20.3721	0.178517	20.3672	0.276321	0.996606	0.366922	>0.05
D4A6K9	D4A6K9_RAT	Active BCR-related gene (Predicted) (Protein Abr)	Abr Abr_predicted rCG_33397	859	9	23.9767	0.0354603	24.0459	0.0599722	1.04912	0.0448119	>0.05	8	22.8546	0.0758227	22.7877	0.046386	0.954688	0.0319066	>0.05
D4A6L0	GP158_RAT	Probable G-protein coupled receptor 158	Gpr158	1202	15	25.5803	0.0401138	25.6009	0.0599931	1.0144	0.042158	>0.05
D4A6L2	D4A6L2_RAT	Uncharacterized protein	0	3626									4	21.0634	0.0787787	21.1477	0.0750964	1.06018	0.0574422	>0.05
D4A6W6	D4A6W6_RAT	Protein RGD1561333	RGD1561333	257									3	22.2771	0.074824	22.3742	0.0910197	1.06962	0.0693343	>0.05
D4A6X4	D4A6X4_RAT	Acylphosphatase (EC 3.6.1.7)	Acyp1 Acyp1_predicted rCG_20688	99	2	23.2797	0.0399912	23.2851	0.0837923	1.00373	0.0598198	>0.05
D4A720	D4A720_RAT	Protein Srsf7 (RCG61762, isoform CRA_d)	Srsf7 rCG_61762	238	3	27.9384	0.143	27.9844	0.0915857	1.03241	0.0684326	>0.05
D4A746	D4A746_RAT	GDP-mannose pyrophosphorylase B (Predicted), isoform CRA_a (Protein Gmppb)	Gmppb Gmppb_predicted rCG_25921	360									3	19.9386	0.122959	20.1801	0.0992524	1.18216	0.0805986	>0.05
D4A781	D4A781_RAT	Protein Ipo5	Ipo5	1097	7	23.4455	0.268278	23.3238	0.258172	0.91912	0.154828	>0.05	9	22.4727	0.081309	22.6008	0.0890012	1.09284	0.067796	>0.05
D4A7F3	D4A7F3_RAT	Guanine nucleotide exchange factor DBS (Mcf.2 transforming sequence-like, isoform CRA_a)	Mcf2l rCG_43236	1172	2	18.0465	0.302546	17.4843	0.441782	0.67727	0.211705	>0.05
D4A7L4	D4A7L4_RAT	NADH dehydrogenase (Ubiquinone) 1 beta subcomplex, 11 (Predicted) (Protein Ndufb11)	Ndufb11 Ndufb11_predicted rCG_42934	151	5	25.8618	0.0969571	25.8916	0.0964389	1.02088	0.0686174	>0.05	6	25.3071	0.05143	25.2368	0.0778375	0.952427	0.0513684	>0.05
D4A7M0	D4A7M0_RAT	Uncharacterized protein	Plxnc1	1574	3	23.4878	1.4024	24.7092	0.463565	2.33167	0.777028	>0.05	5	24.5319	0.125463	24.6021	0.12035	1.04985	0.0966172	>0.05
D4A7N1	MIC25_RAT	MICOS complex subunit Mic25 (Coiled-coil-helix-coiled-coil-helix domain-containing protein 6)	Chchd6 Mic25	261	4	24.0276	0.0559813	23.9556	0.0695872	0.95134	0.0457509	>0.05	4	23.0881	0.0612653	23.1378	0.0686264	1.03508	0.0444136	>0.05
D4A7U1	D4A7U1_RAT	Protein Zyx	Zyx	564	2	22.313	0.0771499	22.2544	0.0801254	0.960196	0.0587372	>0.05	3	18.5109	0.152175	18.0179	0.116819	0.710521	0.0565355	<0.05
D4A7V6	D4A7V6_RAT	Protein Casp8ap2 (RCG55124)	Casp8ap2 rCG_55124	1962	5	22.4316	0.222954	22.3773	0.217532	0.963046	0.160402	>0.05
D4A7X9	D4A7X9_RAT	Myosin IF (Predicted) (Protein Myo1f)	Myo1f Myo1f_predicted rCG_37554	1098	3	18.9296	0.569462	18.1104	0.500096	0.566767	0.467307	>0.05
D4A830	D4A830_RAT	Protein Ppa2	Ppa2	304	7	24.0211	0.248435	24.1297	0.22823	1.07821	0.188566	>0.05	5	22.8263	0.338528	23.0095	0.296062	1.13541	0.23567	>0.05
D4A8H8	D4A8H8_RAT	Cytoplasmic FMR1 interacting protein 1 (Predicted) (Protein Cyfip1)	Cyfip1 Cyfip1_predicted rCG_45119	1253	14	25.83	0.0619996	25.7815	0.054545	0.966951	0.0388519	>0.05	13	24.6084	0.0428707	24.5471	0.0331281	0.958361	0.0214128	>0.05
D4A8L8	D4A8L8_RAT	Protein Fpr2	Fpr2	351									2	8.59698	2.15292	12.5427	1.78961	15.4088	66.3129	>0.05
D4A8S5	D4A8S5_RAT	Cell division cycle 7 (S. cerevisiae) (Predicted) (Protein Cdc7)	Cdc7 Cdc7_predicted rCG_57188	565									2	20.2679	0.0692637	20.2208	0.0525526	0.96788	0.0358088	>0.05
D4A8U7	D4A8U7_RAT	Dynactin 1, isoform CRA_a (Dynactin subunit 1)	Dctn1 rCG_56074	1281	22	25.731	0.0353992	25.6944	0.0350174	0.974952	0.0244528	>0.05	21	24.7538	0.0286924	24.7827	0.0320066	1.02023	0.022595	>0.05
D4A9D6	D4A9D6_RAT	DEAH (Asp-Glu-Ala-His) box polypeptide 9 (Predicted) (Protein Dhx9)	Dhx9 Dhx9_predicted rCG_46521	1174	5	23.6253	0.441084	23.6415	0.419666	1.01127	0.351977	>0.05	5	21.619	0.0686016	21.7236	0.0628123	1.07521	0.0437711	>0.05
D4A9D8	D4A9D8_RAT	Oxysterol-binding protein	Osbp Osbp_predicted rCG_47114	682	4	22.8783	0.173623	22.7723	0.162882	0.929172	0.107744	>0.05	5	22.5557	0.0245029	22.6506	0.0239604	1.06801	0.0182883	<0.05
D4A9H7	D4A9H7_RAT	Protein Spata2L (Similar to RIKEN cDNA 2610039E05 (Predicted), isoform CRA_a)	Spata2L RGD1560840_predicted rCG_51414	426	3	22.2476	0.136874	22.057	0.124462	0.876253	0.0800629	>0.05	3	21.1789	0.112608	21.4541	0.113023	1.21013	0.095978	>0.05
D4A9L2	D4A9L2_RAT	Protein Srsf1 (RCG34610, isoform CRA_c)	Srsf1 rCG_34610	248	5	24.3217	0.118029	24.4025	0.106407	1.05763	0.0799386	>0.05	4	22.4285	0.0567143	22.416	0.0513613	0.991363	0.0374682	>0.05
D4A9Q3	D4A9Q3_RAT	Protein RGD1563570	RGD1563570	143									2	19.7993	0.133439	19.8816	0.114062	1.0587	0.086657	>0.05
D4A9T3	D4A9T3_RAT	Protein Hmg1l1	Hmg1l1	213	5	24.8815	0.0460285	24.7652	0.0851913	0.922553	0.0578414	>0.05
D4A9V9	D4A9V9_RAT	Protein Strip2	Strip2	839									3	19.5507	0.136441	19.9982	0.122908	1.3636	0.0759079	<0.05
D4A9Z8	D4A9Z8_RAT	Protein Chmp4b (RCG63680)	Chmp4bl1 Chmp4b rCG_63680	224									2	20.6313	0.114495	20.7305	0.0740815	1.07121	0.0539455	>0.05
D4AA63	D4AA63_RAT	Protein Ubqln2 (Ubiquilin 2 (Predicted))	Ubqln2 Ubqln2_predicted rCG_38924	638	9	25.8656	0.0348468	25.8552	0.0296784	0.992772	0.0203222	>0.05	8	24.0891	0.054957	24.202	0.0504754	1.08145	0.0394301	>0.05
D4AA77	D4AA77_RAT	Plexin D1 (Predicted) (Protein Plxnd1)	Plxnd1 Plxnd1_predicted rCG_30309	1716									3	22.2111	0.137933	22.2077	0.207759	0.99764	0.14684	>0.05
D4AAE9	D4AAE9_RAT	Protein Cisd2 (Similar to RIKEN cDNA 1500009M05 (Predicted))	Cisd2 RGD1566242_predicted rCG_28708	135	2	24.4811	0.0904363	24.4987	0.0955838	1.01226	0.0694209	>0.05	2	22.7651	0.0424965	22.9111	0.02563	1.10646	0.0199758	<0.01
D4AAG8	D4AAG8_RAT	Protein Smchd1	Smchd1	2006									2	22.0085	0.231698	21.994	0.198305	0.990002	0.139161	>0.05
D4AAI9	D4AAI9_RAT	Protein Brwd1	Brwd1	2303									3	21.634	0.0705719	21.5312	0.0726749	0.931211	0.0534411	>0.05
D4AAT7	NNRD_RAT	ATP-dependent (S)-NAD(P)H-hydrate dehydratase (EC 4.2.1.93) (ATP-dependent NAD(P)HX dehydratase) (Carbohydrate kinase domain-containing protein)	Carkd	343	3	22.1922	0.173019	22.0434	0.132095	0.902029	0.0916895	>0.05
D4AB01	D4AB01_RAT	Histidine triad nucleotide binding protein 2 (Predicted), isoform CRA_a (Protein Hint2)	Hint2 Hint2_predicted rCG_54875	163	3	24.6221	0.0472352	24.5953	0.0413739	0.98159	0.028019	>0.05	3	22.5174	0.149772	22.7168	0.132495	1.14819	0.101975	>0.05
D4AB03	D4AB03_RAT	Protein Fam120a	Fam120a	1115	2	21.2537	0.125368	21.0495	0.158447	0.868045	0.0804725	>0.05	2	20.8294	0.504651	20.3917	0.736154	0.738325	0.530744	>0.05
D4AB17	D4AB17_RAT	Protein LOC100912917	LOC100912917 Pfas	1273	6	22.9861	0.0476959	22.9647	0.0751096	0.985318	0.0498551	>0.05	4	21.0535	0.0815123	20.9924	0.0568103	0.958539	0.0378111	>0.05
D4ABI6	D4ABI6_RAT	Ubiquitin carboxyl-terminal hydrolase (EC 3.4.19.12)	Uchl3 RGD1561252	230									6	23.9058	0.0393773	24.0585	0.0393555	1.11162	0.0308577	<0.05
D4ABI7	D4ABI7_RAT	Protein LOC100365676 (Similar to Butyrate-induced transcript 1 (Predicted))	LOC100365676 Ptplad1 RGD1565496_predicted rCG_58140	362	3	22.4558	0.0613492	22.605	0.0448625	1.10897	0.0371484	>0.05	3	21.0509	0.129787	21.0774	0.169908	1.01853	0.115097	>0.05
D4ABK1	D4ABK1_RAT	Protein Syngr3 (Synaptogyrin 3 (Predicted), isoform CRA_a)	Syngr3 Syngr3_predicted rCG_34021	199	3	23.1525	0.197702	23.0597	0.222893	0.9377	0.140316	>0.05
D4ABT8	D4ABT8_RAT	Protein Hnrnpul2	Hnrnpul2	745	3	22.7455	0.128588	22.7886	0.11232	1.03031	0.0780563	>0.05	2	21.449	0.0469977	21.5043	0.0776722	1.03905	0.0555358	>0.05
D4AC23	D4AC23_RAT	Protein Cct7 (RCG55994, isoform CRA_c)	Cct7 rCG_55994	544	13	25.9132	0.0751393	25.9497	0.0432036	1.02562	0.030298	>0.05	13	25.1289	0.115051	25.1606	0.120205	1.02228	0.086898	>0.05
D4AC70	D4AC70_RAT	Procollagen, type VIII, alpha 1 (Predicted) (Protein Col8a1)	Col8a1 Col8a1_predicted rCG_52740	743									2	20.7589	0.233134	21.0512	0.176253	1.22464	0.149675	>0.05
D4ACB8	D4ACB8_RAT	Chaperonin subunit 8 (Theta) (Predicted), isoform CRA_a (Protein Cct8)	Cct8 Cct8_predicted rCG_58706	548	21	26.8984	0.053631	26.9125	0.042335	1.00982	0.0301528	>0.05	19	25.646	0.0227478	25.652	0.0307326	1.00416	0.0215551	>0.05
D4ACG7	D4ACG7_RAT	Protein Cpne6 (RCG23547, isoform CRA_a)	Cpne6 rCG_23547	557									6	22.3258	0.101195	22.4373	0.129473	1.08034	0.104408	>0.05
D4ACN8	PLRKT_RAT	Plasminogen receptor (KT) (Plg-R(KT))	Plgrkt	147	3	21.5333	0.0826511	21.4266	0.0693296	0.928666	0.043567	>0.05
D4AD82	D4AD82_RAT	Rho GTPase-activating protein 35	Arhgap35 Grlf1	1278	4	22.2697	0.0654938	22.1783	0.0606386	0.938638	0.0417018	>0.05
D4ADD7	D4ADD7_RAT	Glutaredoxin 5 homolog (S. cerevisiae) (Predicted), isoform CRA_b (Protein Glrx5)	Glrx5 Glrx5_predicted rCG_20833	152	2	22.6136	0.178506	22.5699	0.166157	0.970185	0.112695	>0.05	2	21.9365	0.0723299	22.0144	0.0611486	1.05547	0.044449	>0.05
D4ADF5	D4ADF5_RAT	Protein LOC100912106 (RCG53732, isoform CRA_a)	Pdcd5 LOC100912106 rCG_53732	125	3	22.5581	0.0671616	22.5732	0.0790503	1.01053	0.0562569	>0.05	4	21.4997	0.13324	21.4307	0.0841288	0.953308	0.0556898	>0.05
D4ADS4	D4ADS4_RAT	Protein Mgst3 (RCG46430)	Mgst3 rCG_46430	152	10	25.6298	0.0628594	25.7301	0.0494815	1.07197	0.034876	>0.05	8	23.7754	0.0630674	23.8311	0.0472439	1.03935	0.0318921	>0.05
D4AE00	D4AE00_RAT	AP-3 complex subunit beta	Ap3b2	1082	14	25.5832	0.0398151	25.5309	0.0530837	0.964394	0.0346927	>0.05	9	22.7791	0.0408203	22.7356	0.0335556	0.97029	0.0227017	>0.05
D4AE10	D4AE10_RAT	Protein RGD1563613	RGD1563613	124	2	22.6404	0.0725215	22.6445	0.101476	1.00286	0.0720637	>0.05
D4AE41	RMXL1_RAT	RNA binding motif protein, X-linked-like-1 (Heterogeneous nuclear ribonucleoprotein G-like 1)	Rbmxl1	388	3	24.0882	0.0886634	23.9613	0.114325	0.915792	0.0699413	>0.05
D4AE68	D4AE68_RAT	Guanine nucleotide binding protein, alpha q polypeptide, isoform CRA_a (Guanine nucleotide-binding protein G(q) subunit alpha)	Gnaq rCG_47814	359	10	26.3189	0.075452	26.2924	0.0636906	0.981825	0.0453457	>0.05
D4AE96	D4AE96_RAT	Importin 7 (Predicted), isoform CRA_c (Protein Ipo7)	Ipo7 Ipo7_predicted rCG_39997	1038	6	21.7994	0.171393	21.5828	0.0863721	0.860575	0.0511433	>0.05
D4AEH3	D4AEH3_RAT	Proteasome (Prosome, macropain) 26S subunit, non-ATPase, 7 (Predicted) (Protein Psmd7)	Psmd7 Psmd7_predicted rCG_51362	320	3	21.9506	0.0580219	22.0446	0.0570268	1.06734	0.0429825	>0.05	3	20.1531	0.149131	19.8795	0.143967	0.827247	0.0843762	>0.05
D4AEH9	D4AEH9_RAT	Amylo-1, 6-glucosidase, 4-alpha-glucanotransferase (Glycogen debranching enzyme, glycogen storage disease type III) (Predicted), isoform CRA_a (Protein Agl)	Agl Agl_predicted rCG_28583	1532	2	21.2283	0.0731851	21.2693	0.0737655	1.02878	0.0537731	>0.05
D4AEP0	D4AEP0_RAT	Adenylosuccinate synthetase isozyme 2 (AMPSase 2) (AdSS 2) (EC 6.3.4.4) (Adenylosuccinate synthetase, acidic isozyme) (Adenylosuccinate synthetase, liver isozyme) (IMP--aspartate ligase 2)	Adss Adss2 Adss_predicted rCG_20425	456	4	22.4145	0.0539516	22.4132	0.0625376	0.999134	0.0395237	>0.05	7	23.1264	0.103058	23.2094	0.0852156	1.05921	0.0632701	>0.05
D7NIW0	D7NIW0_RAT	Nedd4l	0	968	4	24.0543	0.546692	23.6417	0.444749	0.751287	0.3722	>0.05
E2RUH2	E2RUH2_RAT	Ribonuclease inhibitor (Ribonuclease/angiogenin inhibitor 1, isoform CRA_a)	Rnh1 LOC100360501 rnase-inh rCG_47479	456	9	23.5979	0.0709714	23.9356	0.0613475	1.26374	0.0429402	<0.001	9	22.1041	0.0464894	22.227	0.0816099	1.08893	0.0688369	>0.05
E9PSU6	E9PSU6_RAT	Protein Pcnx	Pcnx	2343	2	20.8092	0.140903	20.9001	0.250392	1.06504	0.210534	>0.05
E9PT22	E9PT22_RAT	Uncharacterized protein	0	1271	3	21.2515	0.287241	21.3332	0.21328	1.05826	0.116536	>0.05	4	20.1699	0.109587	20.3039	0.155128	1.09737	0.133008	>0.05
E9PT53	E9PT53_RAT	Protein Wfs1 (Wolfram syndrome 1 homolog (Human))	Wfs1 rCG_36058	890	3	20.8357	0.0862771	21.0598	0.159567	1.16803	0.155817	>0.05	3	21.4834	0.0760986	21.6666	0.115903	1.13545	0.0945063	>0.05
E9PT76	E9PT76_RAT	Uncharacterized protein	0	267	6	24.3227	0.17436	24.1942	0.165299	0.914779	0.111425	>0.05
E9PTD2	E9PTD2_RAT	Phosphatidylinositol-binding clathrin assembly protein	Picalm	597	10	27.0434	0.12802	27.1347	0.128889	1.06534	0.0966024	>0.05
E9PTI1	E9PTI1_RAT	Protein Atp6v1h	Atp6v1h	441	21	27.8637	0.0471396	27.8385	0.031016	0.982682	0.0211483	>0.05
E9PTK8	E9PTK8_RAT	Protein Lmo7	Lmo7	1726	6	22.765	0.121977	22.8818	0.0973657	1.08437	0.0686812	>0.05	7	21.2948	0.0815477	21.5188	0.0638172	1.16795	0.0517837	<0.05
E9PTU4	E9PTU4_RAT	Myosin-11	Myh11	1972									15	24.3929	0.0496288	24.4188	0.0444238	1.01816	0.0324218	>0.05
E9PTV0	E9PTV0_RAT	Guanylate kinase 1, isoform CRA_a (Protein Guk1)	Guk1 rCG_34329	219	2	20.8634	0.194677	20.5599	0.1633	0.8103	0.0971515	>0.05
E9PTW1	E9PTW1_RAT	Protein Scamp3	Scamp3	350	4	23.509	0.0898729	23.5841	0.0305493	1.05345	0.0228823	>0.05	4	22.2787	0.0794528	22.3985	0.0798555	1.08659	0.0589968	>0.05
E9PTX3	E9PTX3_RAT	Protein Hook2	Hook2	719	2	22.2273	0.466811	22.3149	0.316325	1.06261	0.14832	>0.05
E9PTX9	E9PTX9_RAT	Protein Slc12a2	Slc12a2	1203	7	23.275	0.081668	23.1988	0.0743103	0.948531	0.0510642	>0.05	9	22.8187	0.0992817	22.675	0.0958995	0.905236	0.0624667	>0.05
E9PU01	E9PU01_RAT	Protein Chd4	Chd4	1915	2	24.0303	0.179229	24.3614	0.102355	1.25795	0.0791616	>0.05	5	21.3928	0.0831842	21.5303	0.0778184	1.10003	0.0590569	>0.05
E9PU03	E9PU03_RAT	Protein Smg5	Smg5	1017									2	23.4911	0.155393	23.5397	0.112114	1.03428	0.0874122	>0.05
E9PU24	E9PU24_RAT	Protein Dnah11 (Fragment)	Dnah11	2808									3	23.3469	0.475991	23.4118	0.369191	1.04607	0.174367	>0.05
F1LM28	F1LM28_RAT	Neurofibromin (Fragment)	Nf1	2808									5	20.4466	0.0698333	20.5215	0.0858963	1.05327	0.0646416	>0.05
F1LM42	F1LM42_RAT	Protein Ank2	Ank2	3965	67	29.1185	0.0808931	29.1139	0.067784	0.996829	0.050353	>0.05
F1LM47	F1LM47_RAT	Succinyl-CoA ligase subunit beta (EC 6.2.1.-)	Sucla2	465									20	26.7678	0.0230559	26.7792	0.0353532	1.00788	0.0245626	>0.05
F1LMC0	F1LMC0_RAT	Protein Pde1a	Pde1a	543	5	24.7875	0.150536	24.9132	0.153144	1.09103	0.123193	>0.05	4	23.1955	0.145734	23.371	0.0608843	1.12939	0.0480366	>0.05
F1LMC7	F1LMC7_RAT	Protein LOC100910754	Sept7 LOC100910754	437	18	29.2344	0.0451119	29.2035	0.0520307	0.978754	0.0354623	>0.05
F1LMK8	F1LMK8_RAT	Protein Jmjd1c	Jmjd1c	2525	2	25.1343	0.141994	25.114	0.14516	0.986001	0.107587	>0.05
F1LMV8	F1LMV8_RAT	Protein kinase C (EC 2.7.11.13)	Prkce	736	12	24.9243	0.0548472	24.938	0.072216	1.00955	0.0569699	>0.05	13	23.7341	0.0510885	23.842	0.0475334	1.07769	0.0355958	>0.05
F1LMV9	F1LMV9_RAT	Coronin (Fragment)	Coro2b	479	3	21.8027	0.103197	21.8892	0.0397528	1.06176	0.0296595	>0.05	3	20.7987	0.098487	20.8254	0.0746028	1.01866	0.0533976	>0.05
F1LMY4	RYR1_RAT	Ryanodine receptor 1 (RYR-1) (RyR1) (Skeletal muscle calcium release channel) (Skeletal muscle ryanodine receptor) (Skeletal muscle-type ryanodine receptor) (Type 1 ryanodine receptor)	Ryr1	5035									3	18.1907	0.168085	18.3836	0.12794	1.14307	0.0981447	>0.05
F1LMZ8	PSD11_RAT	26S proteasome non-ATPase regulatory subunit 11 (26S proteasome regulatory subunit RPN6)	Psmd11	422	3	22.1642	0.141088	22.0897	0.114824	0.949669	0.0912843	>0.05	6	21.5362	0.0622854	21.5575	0.0733623	1.01488	0.0518456	>0.05
F1LN18	F1LN18_RAT	Hypoxia up-regulated protein 1	Hyou1	999	13	24.4775	0.0315954	24.5109	0.0287966	1.02341	0.0203821	>0.05
F1LN75	F1LN75_RAT	Septin-9 (Fragment)	42256	574									7	22.8897	0.135771	22.9478	0.0737547	1.04109	0.0511555	>0.05
F1LN76	F1LN76_RAT	Protein Cfap43 (Fragment)	Cfap43 Wdr96	1665	2	21.4192	0.0906321	21.2647	0.0604647	0.898438	0.0384223	>0.05
F1LN88	F1LN88_RAT	Aldehyde dehydrogenase, mitochondrial (RCG21519, isoform CRA_a)	Aldh2 rCG_21519	519									17	25.352	0.0600268	25.4603	0.0666434	1.07797	0.0521118	>0.05
F1LN92	F1LN92_RAT	Protein Afg3l2	Afg3l2	802	6	22.8978	0.190446	22.6988	0.228809	0.87117	0.154153	>0.05	4	21.1862	0.12765	21.2007	0.137754	1.0101	0.0816641	>0.05
F1LNB2	F1LNB2_RAT	Phosphatase and actin regulator	Phactr1	580	13	26.4277	0.109686	26.9173	0.0849905	1.40405	0.0409817	<0.001	13	24.9215	0.0987555	25.1291	0.079737	1.15474	0.0618562	>0.05
F1LNE7	F1LNE7_RAT	Serine/threonine-protein kinase MARK1 (Fragment)	Mark1	776									5	22.3798	0.0574368	22.4797	0.059257	1.0717	0.0435187	>0.05
F1LNM0	F1LNM0_RAT	Disks large homolog 1	Dlg1	911	15	26.4922	0.0763474	26.4455	0.0661821	0.968142	0.0439874	>0.05
F1LNM3	F1LNM3_RAT	Ankyrin-3	Ank3	2598	18	25.0623	0.0512293	25.0685	0.0475737	1.00428	0.031078	>0.05
F1LNN8	F1LNN8_RAT	Protein Dapk1	Dapk1	1430									3	21.4963	0.170367	21.4237	0.166042	0.950905	0.0988251	>0.05
F1LNQ7	F1LNQ7_RAT	Short transient receptor potential channel 3 (Transient receptor potential cation channel, subfamily C, member 3)	Trpc3 rCG_41547	838	2	25.1092	0.135813	25.2447	0.104215	1.09841	0.0736245	>0.05
F1LP01	F1LP01_RAT	Diacylglycerol kinase (DAG kinase) (EC 2.7.1.107)	Dgkb rCG_62181	802	18	26.8139	0.122113	27.2664	0.11349	1.36839	0.0255941	<0.001	18	25.2647	0.120331	25.5237	0.0773476	1.19661	0.064953	>0.05
F1LP21	F1LP21_RAT	Protein Timm8a1	Timm8a1	97	3	23.95	0.0434142	23.9769	0.0445507	1.01881	0.031397	>0.05
F1LP30	F1LP30_RAT	Methylcrotonoyl-CoA carboxylase subunit alpha, mitochondrial	Mccc1	715	3	20.2532	0.150871	20.1643	0.142508	0.940245	0.105209	>0.05
F1LP90	MINK1_RAT	Misshapen-like kinase 1 (EC 2.7.11.1) (GCK family kinase MiNK) (MAPK/ERK kinase kinase kinase 6) (MEK kinase kinase 6) (MEKKK 6) (Misshapen/NIK-related kinase) (Mitogen-activated protein kinase kinase kinase kinase 6)	Mink1 Map4k6 Mink	1336	2	22.4239	0.120839	22.454	0.0967703	1.02113	0.0711004	>0.05	7	22.624	0.0673439	22.622	0.0383002	0.998594	0.0266582	>0.05
F1LPB9	F1LPB9_RAT	Rabphilin-3A	Rph3a	684	19	27.6285	0.0437084	27.5034	0.0624066	0.916936	0.0391287	>0.05	15	26.6459	0.0299132	26.6858	0.0454176	1.02809	0.0311098	>0.05
F1LPD3	F1LPD3_RAT	Protein Cep350	Cep350	3080									4	20.8796	0.196425	20.8594	0.242668	0.986128	0.166461	>0.05
F1LPG5	F1LPG5_RAT	Protein LOC691675	LOC688963 LOC691675	129	3	26.5016	0.165072	26.407	0.229299	0.93653	0.16435	>0.05	3	24.727	0.0254109	24.7593	0.0482307	1.02268	0.0345955	>0.05
F1LPJ6	F1LPJ6_RAT	Ubiquitin carboxyl-terminal hydrolase CYLD	Cyld	953									7	21.6724	0.0829162	21.8132	0.0695266	1.1025	0.0498285	>0.05
F1LPP0	F1LPP0_RAT	Protein LOC100910792 (Fragment)	Amph LOC100909679 LOC100910792	657									22	26.8973	0.0571623	26.8168	0.0473626	0.945765	0.0297466	>0.05
F1LPP3	F1LPP3_RAT	Protein kinase C and casein kinase substrate in neurons protein 1	Pacsin1	441									17	28.3867	0.0295672	28.4224	0.0307318	1.02504	0.0216626	>0.05
F1LPP6	F1LPP6_RAT	A-kinase anchor protein 5	Akap5	714	18	27.9673	0.121808	28.576	0.0991053	1.52491	0.0401494	<0.001	17	26.6363	0.0858542	26.8818	0.0828499	1.18555	0.0680727	>0.05
F1LPS8	F1LPS8_RAT	Transcriptional activator protein Pur-alpha	Pura	303	8	27.3656	0.120074	27.4256	0.0710234	1.0425	0.0523532	>0.05	6	26.0163	0.0648279	26.005	0.0502432	0.992184	0.0353856	>0.05
F1LPT0	F1LPT0_RAT	Gap junction protein (Fragment)	Gjc3	258	2	22.6807	0.232085	22.7574	0.216714	1.05457	0.145802	>0.05	2	21.2512	0.161124	21.1972	0.11449	0.963254	0.0742771	>0.05
F1LPV0	F1LPV0_RAT	Protein Nars (RCG46601, isoform CRA_b)	Nars rCG_46601	558	7	24.1044	0.0536839	24.123	0.0486988	1.013	0.0335777	>0.05	10	23.4845	0.0776873	23.4155	0.0635626	0.953245	0.0436714	>0.05
F1LPV8	F1LPV8_RAT	Succinyl-CoA ligase subunit beta (EC 6.2.1.-)	Suclg2	431									3	22.384	0.163783	22.5198	0.101137	1.09875	0.0723283	>0.05
F1LQ45	F1LQ45_RAT	Epsin-2	Epn2	583	3	22.195	0.112672	22.1873	0.112536	0.994647	0.0772074	>0.05
F1LQ48	F1LQ48_RAT	Protein Fblim1	Hnrnpl Fblim1	623									16	25.0894	0.0470898	25.1989	0.0548486	1.07888	0.042936	>0.05
F1LQ70	LOX12_RAT	Arachidonate 12-lipoxygenase, 12S-type (12S-LOX) (12S-lipoxygenase) (EC 1.13.11.31) (Lipoxin synthase 12-LO) (EC 3.3.2.-) (Platelet-type lipoxygenase 12)	Alox12	663									2	18.6934	0.0966712	18.8214	0.0539588	1.09284	0.0413589	>0.05
F1LQI1	F1LQI1_RAT	Hydroxyacyl glutathione hydrolase (Hydroxyacylglutathione hydrolase, mitochondrial)	Hagh rCG_35488	309	6	24.4954	0.0543303	24.4389	0.06302	0.961538	0.0421484	>0.05	4	23.0582	0.062802	23.1472	0.0515174	1.06362	0.0364399	>0.05
F1LQQ1	F1LQQ1_RAT	Malic enzyme (Fragment)	Me1	549	5	22.7076	0.056232	23.2122	0.0897375	1.41866	0.0435923	<0.001	3	20.7922	0.103446	21.0489	0.0719387	1.19473	0.063901	>0.05
F1LQW3	F1LQW3_RAT	Protein Sfpq (Fragment)	Sfpq	606	13	25.2057	0.0740871	25.101	0.0626704	0.930006	0.038945	>0.05
F1LQX4	RHG44_RAT	Rho GTPase-activating protein 44 (Rho-type GTPase-activating protein RICH2) (RhoGAP interacting with CIP4 homologs protein 2) (RICH-2)	Arhgap44 Rich2	814	4	22.2918	0.056846	22.3433	0.0682576	1.03636	0.0496874	>0.05	4	21.0136	0.103756	20.9803	0.0712019	0.977182	0.0449749	>0.05
F1LQY6	F1LQY6_RAT	EF hand calcium binding protein 2 (Protein Necab2)	Necab2 Efcbp2 rCG_51128	352									8	22.7662	0.113973	23.0975	0.122159	1.25818	0.104171	>0.05
F1LR80	F1LR80_RAT	CaM kinase-like vesicle-associated protein	Camkv	504	20	28.6442	0.0715067	28.7288	0.0456762	1.06037	0.0340447	>0.05	16	27.4976	0.0418593	27.5779	0.0561318	1.05722	0.0387802	>0.05
F1LRB8	F1LRB8_RAT	S-adenosylmethionine synthase (EC 2.5.1.6)	LOC100363915 rCG_56483	395	3	23.7467	0.0781581	23.7832	0.0918104	1.02558	0.0665278	>0.05	4	21.9874	0.0925569	22.1221	0.0813723	1.09789	0.0623557	>0.05
F1LRI7	F1LRI7_RAT	AP2-associated protein kinase 1	Aak1	963	25	27.4571	0.0397288	27.4346	0.0273583	0.984513	0.0187578	>0.05	25	26.0033	0.0626584	25.8925	0.0280038	0.926073	0.0180302	>0.05
F1LRK0	F1LRK0_RAT	Clathrin coat assembly protein AP180	Snap91	919	19	29.4428	0.0228242	30.6505	0.0353962	2.30968	0.0250919	<0.001	19	28.4075	0.039912	28.0612	0.0447	0.786628	0.0288165	<0.001
F1LRK1	F1LRK1_RAT	Potassium-transporting ATPase alpha chain 1	Atp4a	1033									8	29.9876	0.0469437	30.0039	0.0492026	1.01135	0.0336312	>0.05
F1LRL9	F1LRL9_RAT	Microtubule-associated protein 1B	Map1b	2461	67	29.6118	0.0306548	29.6741	0.0391418	1.04416	0.0291499	>0.05	61	28.4035	0.020038	28.3269	0.0458003	0.948261	0.0308789	>0.05
F1LRQ0	F1LRQ0_RAT	Gamma-aminobutyric acid receptor subunit beta-3	Gabrb3	471									4	21.7183	0.135486	21.7505	0.142848	1.0226	0.111231	>0.05
F1LRS5	F1LRS5_RAT	Protein Aplp1 (Fragment)	Aplp1	605	4	21.2192	0.184316	21.5213	0.147385	1.23291	0.111856	>0.05
F1LRV6	F1LRV6_RAT	GMP reductase (EC 1.7.1.7)	Gmpr	345	2	21.21	0.0686445	21.0882	0.0551247	0.919064	0.0355245	>0.05	3	20.0178	0.0911246	20.1811	0.0804699	1.11991	0.061827	>0.05
F1LRW9	F1LRW9_RAT	Phosphatidylinositol 4-kinase alpha	Pi4ka	2044	7	23.2629	0.0852849	23.2881	0.0802028	1.01762	0.059822	>0.05
F1LRZ1	F1LRZ1_RAT	Ryanodine receptor 2	Ryr2	4826	5	23.7118	0.116313	23.7625	0.0866197	1.0358	0.0674136	>0.05
F1LRZ7	F1LRZ7_RAT	Neurofilament heavy polypeptide	Nefh	1064	24	29.1419	0.126413	28.5999	0.123141	0.686856	0.0577338	<0.001	19	28.0059	0.138737	27.9699	0.102474	0.975299	0.074518	>0.05
F1LS67	F1LS67_RAT	Regulator of G-protein-signaling 6	Rgs6	473	4	22.1234	0.105689	22.0338	0.0961526	0.939808	0.0557882	>0.05
F1LSC9	F1LSC9_RAT	Protein Bcas3 (Fragment)	Bcas3	532									3	24.2514	0.0992583	24.1783	0.0844534	0.950602	0.05781	>0.05
F1LSE0	F1LSE0_RAT	Protein Dnah2 (Fragment)	Dnah2	4371									6	22.7914	0.0860062	22.864	0.0931026	1.05164	0.0721861	>0.05
F1LSE6	F1LSE6_RAT	Liprin-alpha-3	Ppfia3	1192	11	24.1834	0.0800385	24.0603	0.0828584	0.918223	0.056985	>0.05	12	23.1831	0.0286296	23.1898	0.0231938	1.00462	0.0161126	>0.05
F1LSL6	F1LSL6_RAT	Disks large-associated protein 2 (Fragment)	Dlgap2	1024	5	22.8951	0.114084	22.7748	0.0815135	0.919979	0.0548506	>0.05
F1LSL8	F1LSL8_RAT	Protein Sptbn4	Sptbn4	2561	4	23.5343	0.184955	23.4847	0.181714	0.96618	0.127057	>0.05	8	22.4347	0.045017	22.4536	0.0381931	1.01322	0.0275531	>0.05
F1LSM5	F1LSM5_RAT	Nck-associated protein 1 (Fragment)	Nckap1	1093	14	25.1432	0.0549062	25.1802	0.0813276	1.02597	0.0590709	>0.05	11	24.2088	0.0770496	24.2486	0.102649	1.02803	0.0794095	>0.05
F1LST0	F1LST0_RAT	Protein Heatr5b	Heatr5b	2030									6	22.9437	0.188579	23.336	0.0883511	1.31245	0.0806748	>0.05
F1LSY2	F1LSY2_RAT	Neuronal pentraxin receptor (Fragment)	Nptxr	494									4	21.5774	0.0745937	21.2856	0.0336491	0.816871	0.0191514	<0.01
F1LT49	F1LT49_RAT	Protein Lrrc47	Lrrc47	580	4	22.1638	0.0732198	22.1759	0.0469761	1.00847	0.0315037	>0.05	3	20.4873	0.083375	20.6213	0.085863	1.09736	0.062568	>0.05
F1LTJ9	F1LTJ9_RAT	Protein LOC100364190 (Fragment)	LOC100364190	443	4	21.893	0.0850199	21.8951	0.0619862	1.00148	0.0411932	>0.05	3	19.5774	0.0571397	19.7137	0.0754574	1.09909	0.0539221	>0.05
F1LTZ6	F1LTZ6_RAT	Protein RGD1559921 (Fragment)	RGD1559921	112	2	26.5881	0.211012	26.7504	0.194974	1.11913	0.183766	>0.05
F1LU71	F1LU71_RAT	AU RNA binding protein/enoyl-coenzyme A hydratase (Predicted), isoform CRA_a (Protein Auh)	Auh Auh_predicted rCG_44030	315	7	25.9756	0.138191	25.9863	0.107234	1.00746	0.0773226	>0.05	7	24.7294	0.0289643	24.7692	0.0380945	1.02799	0.0278943	>0.05
F1LUA1	F1LUA1_RAT	Protein Eea1 (Fragment)	Eea1	1411	7	23.7409	0.140561	23.7082	0.10813	0.977608	0.0788209	>0.05	12	23.6736	0.0968081	23.6372	0.142885	0.975078	0.10534	>0.05
F1LUT0	F1LUT0_RAT	Choline transporter-like protein 1 (Fragment)	Slc44a1	654	5	22.8852	0.141213	22.9495	0.18646	1.04559	0.130127	>0.05
F1LUT4	F1LUT4_RAT	Phospholipid-translocating ATPase (EC 3.6.3.1) (Fragment)	Atp8a1	1133									14	23.8264	0.0498036	23.8919	0.0698961	1.04646	0.0528776	>0.05
F1LUV9	F1LUV9_RAT	Neural cell adhesion molecule 1 (Fragment)	Ncam1	838									28	28.4127	0.0460183	28.3635	0.061878	0.966499	0.0423526	>0.05
F1LUY5	F1LUY5_RAT	Protein Ttc7b (Fragment)	Ttc7b	586	2	22.3605	0.326407	22.0328	0.142815	0.79679	0.0844182	>0.05
F1LV89	F1LV89_RAT	Protein Rap1gap (RAP1, GTPase activating protein 1, isoform CRA_a)	Rap1gap Rap1ga1 rCG_31337	727	13	25.8127	0.125467	25.9312	0.115589	1.08566	0.0745888	>0.05	12	24.503	0.0801054	24.6718	0.0796915	1.1241	0.0616671	>0.05
F1LVC3	F1LVC3_RAT	Protein Rab6b (RAB6B, member RAS oncogene family (Predicted))	Rab6b Rab6b_predicted rCG_25123	175	5	24.8225	0.0568106	24.8749	0.0610233	1.03698	0.0446008	>0.05	5	23.6725	0.0382255	23.5799	0.0325752	0.937848	0.0211865	>0.05
F1LVR4	F1LVR4_RAT	Protein Camk1d (Fragment)	Camk1d	383	5	23.6931	0.106594	23.7537	0.0822315	1.04288	0.0591178	>0.05	3	21.7041	0.109683	21.6909	0.134734	0.990892	0.0949281	>0.05
F1LVX3	F1LVX3_RAT	Protein LOC102554591 (RCG55853, isoform CRA_b)	LOC102554591 rCG_55853	270									3	21.7307	0.0909372	21.783	0.0865337	1.03695	0.0633203	>0.05
F1LW74	F1LW74_RAT	Protein Iqgap2	Iqgap2 LOC100360623	1575	3	23.8576	0.16861	23.8467	0.160943	0.992495	0.104995	>0.05
F1LW91	F1LW91_RAT	Protein Numa1 (Fragment)	Numa1	2078	4	26.1343	0.343752	26.152	0.297462	1.01234	0.232654	>0.05	4	24.0204	0.455297	23.7779	0.434542	0.845255	0.475447	>0.05
F1LWD6	F1LWD6_RAT	Uncharacterized protein (Fragment)	0	298	2	25.2668	0.176049	25.5118	0.122333	1.18509	0.105423	>0.05
F1LWG4	F1LWG4_RAT	NADH dehydrogenase (Ubiquinone) 1 alpha subcomplex, assembly factor 1 (Predicted), isoform CRA_a (Protein Ndufaf1)	Ndufaf1 Ndufaf1_predicted rCG_26728	328	2	22.3587	0.167627	22.1477	0.167918	0.863922	0.103241	>0.05
F1LWH6	F1LWH6_RAT	Methyl-CpG-binding protein 2 (Fragment)	Mecp2	491	4	22.8981	0.129106	22.768	0.0974784	0.913809	0.0652535	>0.05
F1LWJ5	F1LWJ5_RAT	Protein Diaph2 (Fragment)	Diaph2	858									3	22.5052	0.325931	22.668	0.270839	1.11943	0.16577	>0.05
F1LWZ2	F1LWZ2_RAT	Protein LOC102556952 (Fragment)	LOC102556952	778									2	25.4541	0.169917	25.5929	0.153004	1.10098	0.132643	>0.05
F1LX07	F1LX07_RAT	Protein Slc25a12 (Fragment)	Slc25a12 LOC100360985	675	27	29.3629	0.0267392	29.362	0.0327782	0.999418	0.0225666	>0.05	29	28.0731	0.0339669	28.0949	0.0189689	1.01523	0.0134805	>0.05
F1LX22	F1LX22_RAT	Protein LOC100909950	Pip4k2a LOC100909950	403	3	23.9848	0.0464471	23.9607	0.0480369	0.98343	0.03095	>0.05
F1LXA0	F1LXA0_RAT	NADH dehydrogenase (Ubiquinone) 1 alpha subcomplex, 12 (Predicted), isoform CRA_b (Protein LOC100910710)	Ndufa12 LOC100910710 Ndufa12_predicted rCG_49121	145	8	26.4317	0.0601464	26.5113	0.0644136	1.05668	0.0464987	>0.05	7	25.3664	0.0647395	25.4916	0.0381132	1.09068	0.0285323	>0.05
F1LXU4	F1LXU4_RAT	Protein Nbea (Fragment)	Nbea	1382	5	23.7904	0.0761819	23.7724	0.0717092	0.987608	0.0490723	>0.05	8	22.5513	0.0836645	22.5422	0.115183	0.993709	0.0777465	>0.05
F1LXV7	F1LXV7_RAT	Protein Zfp120 (Fragment)	Zfp120	389	2	19.7042	0.113017	19.6838	0.0707375	0.985965	0.0463264	>0.05
F1LY09	F1LY09_RAT	Protein Actr3b (Fragment)	Actr3b	315	6	25.4426	0.0485264	25.3726	0.0671883	0.95262	0.0429416	>0.05	7	24.0355	0.054928	24.1326	0.0430709	1.06957	0.0316896	>0.05
F1LYA6	F1LYA6_RAT	Protein Abi2	Abi2	534	6	24.9183	0.212046	25.1313	0.10674	1.15904	0.0855072	>0.05	5	23.1894	0.165875	23.4954	0.171602	1.23628	0.163904	>0.05
F1LYQ8	FARP1_RAT	FERM, RhoGEF and pleckstrin domain-containing protein 1	Farp1	1049	2	20.6239	0.176067	20.5221	0.211811	0.931844	0.195822	>0.05
F1LYS1	F1LYS1_RAT	Regulating synaptic membrane exocytosis protein 1	Rims1	1553	11	23.1126	0.055407	23.0151	0.0688044	0.934666	0.0501746	>0.05	8	22.071	0.0661196	22.1134	0.0773958	1.02983	0.0595179	>0.05
F1LYS7	F1LYS7_RAT	Uncharacterized protein	Sgcd	289	3	23.8732	0.273012	23.936	0.303485	1.04449	0.208423	>0.05
F1LZ64	F1LZ64_RAT	Protein Abhd12b	Abhd12b	212									2	21.2561	0.12433	21.5117	0.151466	1.19377	0.12126	>0.05
F1LZ81	F1LZ81_RAT	Protein Dock4 (Fragment)	Dock4	1966									4	22.3326	0.243054	22.1844	0.241	0.902371	0.191929	>0.05
F1LZD2	F1LZD2_RAT	Protein LOC100362109 (Fragment)	LOC100362109	595	2	20.2849	0.369527	20.1907	0.356579	0.93682	0.254002	>0.05
F1LZX5	F1LZX5_RAT	Protein Hectd4 (Fragment)	Hectd4 RGD1309762	4074	8	23.4041	0.142612	23.4998	0.132725	1.06858	0.0923807	>0.05	6	23.6702	0.0603711	23.7151	0.049942	1.03157	0.0360937	>0.05
F1M0R1	F1M0R1_RAT	Uncharacterized protein	Rnf213	5137									6	23.9562	0.0406311	24.0459	0.0566949	1.06414	0.0438492	>0.05
F1M0Z1	F1M0Z1_RAT	Protein Trio	Trio	3104	2	20.6284	0.0610817	20.5851	0.0365153	0.970398	0.024506	>0.05	7	22.1029	0.114747	22.1112	0.132864	1.00582	0.0971223	>0.05
F1M0Z3	F1M0Z3_RAT	Copine IV (Predicted), isoform CRA_a (Protein Cpne4)	Cpne4 Cpne4_predicted rCG_25293	567	4	21.394	0.273001	22.0061	0.10096	1.52853	0.068716	<0.05
F1M111	F1M111_RAT	Protein Myo5c	Myo5c	1742									5	22.1195	0.0865046	21.9377	0.0504736	0.88161	0.0301251	>0.05
F1M287	F1M287_RAT	Protein Srgap1	Srgap1	1085	3	20.7988	0.510027	21.3706	0.197485	1.4864	0.156907	>0.05
F1M2D3	F1M2D3_RAT	Uncharacterized protein	Vdac1	282	11	30.4711	0.0416909	30.4537	0.028419	0.988002	0.0196205	>0.05	11	29.5213	0.0228561	29.6031	0.0243246	1.05837	0.0174436	<0.05
F1M2K6	F1M2K6_RAT	Protein Pkp4	Pkp4	1190									3	21.9497	0.119196	22.1152	0.116221	1.1215	0.0956559	>0.05
F1M2P8	F1M2P8_RAT	Protein kinase C (EC 2.7.11.13)	Prkca	636	9	27.1008	0.101731	27.2142	0.102574	1.08177	0.0803915	>0.05
F1M386	RPGF2_RAT	Rap guanine nucleotide exchange factor 2 (Cyclic nucleotide ras GEF) (CNrasGEF) (Neural RAP guanine nucleotide exchange protein) (nRap GEP) (PDZ domain-containing guanine nucleotide exchange factor 1) (PDZ-GEF1) (RA-GEF-1) (Ras/Rap1-associating GEF-1)	Rapgef2 Pdzgef1	1496	6	23.2621	0.0430344	23.2318	0.0483089	0.979181	0.0338645	>0.05	9	23.7317	0.1087	23.6062	0.107588	0.916741	0.0873797	>0.05
F1M3D3	F1M3D3_RAT	Heterogeneous nuclear ribonucleoprotein M	Hnrnpm	729									7	23.1401	0.0717765	23.241	0.0487756	1.0725	0.0363146	>0.05
F1M3H8	F1M3H8_RAT	Protein Hnrnpa0	Hnrnpa0	303	3	21.8832	0.0671325	21.9103	0.0590516	1.01895	0.041259	>0.05	3	21.3703	0.077729	21.4703	0.0769176	1.07173	0.0662804	>0.05
F1M3P6	F1M3P6_RAT	Protein Scai (RCG37693, isoform CRA_b)	Scai LOC100364814 rCG_37693	606	4	21.797	0.135582	21.4623	0.0728286	0.792937	0.0249401	<0.05
F1M3W5	F1M3W5_RAT	Protein Dmxl2 (Fragment)	Dmxl2	2244	26	26.2487	0.0186678	26.2183	0.0280866	0.979161	0.018873	>0.05	21	24.4823	0.033544	24.5389	0.0257189	1.04	0.0186642	>0.05
F1M403	F1M403_RAT	Protein Ube2o (Fragment)	Ube2o	1287	5	22.7224	0.0564727	22.6546	0.0733212	0.954112	0.0471329	>0.05	6	22.0255	0.0514691	22.1166	0.0582826	1.06515	0.042495	>0.05
F1M471	F1M471_RAT	Protein Epm2aip1	Epm2aip1	474	2	21.6852	0.100031	21.756	0.063903	1.05028	0.0470592	>0.05	4	21.4093	0.052334	21.4449	0.0481319	1.02501	0.0349093	>0.05
F1M4A4	F1M4A4_RAT	Kinesin-like protein	Kif1a LOC100362928	1698	4	21.9541	0.11964	22.0266	0.111977	1.05148	0.0789503	>0.05
F1M4F3	F1M4F3_RAT	Protein Mast4 (Fragment)	Mast4	2372	3	25.4335	0.128325	25.2725	0.110775	0.894415	0.0806175	>0.05
F1M4I5	F1M4I5_RAT	Protein RGD1563293	RGD1563293	417									2	21.7338	0.359194	21.6405	0.387568	0.937353	0.317068	>0.05
F1M4K6	F1M4K6_RAT	Leucine-rich repeat-containing protein 7 (Fragment)	Lrrc7	1494	7	23.9718	0.123459	24.0178	0.101234	1.03235	0.0750496	>0.05
F1M585	F1M585_RAT	Phospholipid-translocating ATPase (EC 3.6.3.1) (Fragment)	Atp8a1	1148	13	24.921	0.0604138	24.9567	0.0781086	1.02504	0.0570602	>0.05
F1M5M9	F1M5M9_RAT	Protein Srgap3	Srgap3	1099	4	22.2828	0.0658752	22.1393	0.0559013	0.90537	0.0337221	>0.05
F1M5N4	F1M5N4_RAT	Malic enzyme	Me3	605	20	26.685	0.0518301	27.1895	0.0375565	1.41866	0.0260956	<0.001	17	25.1817	0.0742055	25.3476	0.029615	1.12189	0.0235181	>0.05
F1M678	F1M678_RAT	Protein Ptprd (Fragment)	Ptprd	1871									6	21.931	0.0687577	21.8891	0.111711	0.971399	0.0708051	>0.05
F1M6P0	F1M6P0_RAT	Uncharacterized protein (Fragment)	0	421	9	30.223	0.028438	30.2098	0.0284824	0.990907	0.0194459	>0.05
F1M779	F1M779_RAT	Clathrin heavy chain	Cltc	1675	87	32.5168	0.0260248	32.5102	0.0261837	0.995417	0.017882	>0.05	87	31.3458	0.0220842	31.3448	0.0119832	0.999294	0.00830018	>0.05
F1M787	F1M787_RAT	Catenin delta-2 (Fragment)	Ctnnd2	866	7	23.8668	0.163833	23.7838	0.151853	0.944105	0.100587	>0.05	7	23.1483	0.298728	23.0833	0.22961	0.955973	0.198804	>0.05
F1M7A9	F1M7A9_RAT	Uncharacterized protein (Fragment)	RGD1561928	192									2	22.3201	0.0617267	22.3718	0.0416185	1.03649	0.0306365	>0.05
F1M7N4	F1M7N4_RAT	Protein Clca5	Clca5	903									3	25.3194	0.224905	25.5138	0.173904	1.14427	0.143032	>0.05
F1M7T8	F1M7T8_RAT	Protein Myom1	Myom1	1690	2	22.2505	0.0717103	22.248	0.0605903	0.998233	0.0405728	>0.05	2	19.241	0.0325319	19.4633	0.0715458	1.16657	0.0632491	<0.05
F1M7V6	F1M7V6_RAT	Cell adhesion molecule 4 (Fragment)	Cadm4	367									8	23.4629	0.0773484	23.3805	0.0836575	0.944464	0.0563456	>0.05
F1M7X3	F1M7X3_RAT	Protein Cdh13 (Fragment)	Cdh13	662	3	24.5237	0.0992559	24.7175	0.149601	1.1438	0.154872	>0.05
F1M7Y3	F1M7Y3_RAT	Protein Rap1gds1 (RAP1, GTP-GDP dissociation stimulator 1 (Predicted), isoform CRA_b)	Rap1gds1 Rap1gds1_predicted rCG_28604	478	19	27.1722	0.0393049	26.825	0.0488753	0.786089	0.0343721	<0.001	17	26.1424	0.0403054	26.065	0.0626143	0.947747	0.0411454	>0.05
F1M820	F1M820_RAT	Sorbin and SH3 domain-containing protein 1 (Fragment)	Sorbs1	1290	7	23.0188	0.0735455	23.1078	0.0723887	1.06361	0.0528645	>0.05	6	21.9258	0.0582509	22.127	0.0346494	1.14971	0.027661	<0.01
F1M823	F1M823_RAT	Intersectin-1	Itsn1	1217	8	23.8796	0.133739	24.0014	0.122978	1.08812	0.0871738	>0.05	7	22.3917	0.0985425	22.427	0.0865649	1.02482	0.0628317	>0.05
F1M836	F1M836_RAT	MAP/microtubule affinity-regulating kinase 3	Mark3	797									5	22.2215	0.0522876	22.2527	0.0644297	1.02185	0.0470504	>0.05
F1M882	F1M882_RAT	Secretory carrier-associated membrane protein 5 (Fragment)	Scamp5	234	3	26.3034	0.066531	26.2028	0.071154	0.932664	0.0493639	>0.05
F1M8G9	F1M8G9_RAT	Protein Ncam2 (Fragment)	Ncam2	819	15	25.8138	0.112487	25.8998	0.0707732	1.06148	0.0492569	>0.05	15	25.0992	0.106627	25.1237	0.108132	1.01709	0.0732201	>0.05
F1M8H6	F1M8H6_RAT	Phosphatidylinositol 4-phosphate 5-kinase type-1 gamma	Pip5k1c	688	9	24.6695	0.0635255	24.752	0.0353139	1.05886	0.0280295	>0.05	9	23.897	0.0529985	23.9155	0.0299662	1.0129	0.0211184	>0.05
F1M8I7	F1M8I7_RAT	Ena/VASP-like protein (Fragment)	Evl	392									2	19.3786	0.11339	19.4069	0.169197	1.01981	0.110143	>0.05
F1M8K0	F1M8K0_RAT	Protein Dag1	Dag1	893	2	22.2792	0.067033	22.2832	0.0712394	1.0028	0.0525385	>0.05	2	23.0596	0.524882	22.9615	0.544231	0.934289	0.457064	>0.05
F1M8K1	F1M8K1_RAT	Protein Pcdh1 (Fragment)	Pcdh1	1017	9	25.8589	0.0684977	25.8353	0.0767786	0.983773	0.0552104	>0.05	7	23.7648	0.113128	23.8979	0.131883	1.09662	0.111706	>0.05
F1M949	F1M949_RAT	Protein Ckap5	Ckap5	2032	4	22.0054	0.0531728	22.0887	0.0529636	1.05944	0.0378591	>0.05	2	19.6559	0.103973	19.4985	0.114282	0.896674	0.0684704	>0.05
F1M951	F1M951_RAT	Protein-tyrosine-phosphatase (EC 3.1.3.48)	Ptpn23	1666									3	24.6345	0.0657617	24.669	0.0991073	1.02414	0.0732789	>0.05
F1M953	F1M953_RAT	Stress-70 protein, mitochondrial	Hspa9	679									20	27.1834	0.0188793	27.2967	0.031066	1.08166	0.0234297	<0.01
F1M978	F1M978_RAT	Inositol monophosphatase 1	Impa1	277	6	25.2944	0.0828702	24.8897	0.0704012	0.755401	0.0400796	<0.001	6	24.5941	0.0585924	24.5024	0.0411086	0.938401	0.0262486	>0.05
F1M9E6	F1M9E6_RAT	Catenin delta-2	Ctnnd2	373	4	21.418	0.161373	21.3828	0.112439	0.975916	0.0777479	>0.05
F1M9N9	F1M9N9_RAT	Protein Ank2 (Fragment)	Ank2	3903	70	29.3134	0.0627256	29.3102	0.0551397	0.997812	0.040809	>0.05	78	28.7627	0.0489248	28.837	0.0378953	1.05287	0.0271878	>0.05
F1M9V3	F1M9V3_RAT	Enolase (EC 4.2.1.11) (Fragment)	RGD1559534	357									6	24.6958	0.0991154	24.5595	0.102607	0.909877	0.0633163	>0.05
F1M9V7	F1M9V7_RAT	Protein Npepps	Npepps	920	29	27.6539	0.0250501	27.6674	0.0253701	1.00939	0.0178323	>0.05	25	26.2321	0.0256717	26.2346	0.0182192	1.0017	0.0125808	>0.05
F1MA36	F1MA36_RAT	Spectrin beta 3 (Spectrin beta chain, non-erythrocytic 2)	Sptbn2 Spnb3 rCG_48072	2388	92	29.8722	0.0471906	29.8848	0.0517934	1.00876	0.0361929	>0.05	98	28.8672	0.0323394	28.8915	0.0202935	1.01693	0.0144015	>0.05
F1MAA0	F1MAA0_RAT	Protein Ttn	Ttn	3648	3	21.146	0.320255	21.2465	0.232739	1.07207	0.1761	>0.05	4	20.4593	0.0735419	20.5457	0.071347	1.06171	0.0554976	>0.05
F1MAA3	F1MAA3_RAT	Protein LOC100909464	LOC100909464	596	8	24.616	0.0977505	24.6795	0.137472	1.04496	0.101293	>0.05	9	23.5808	0.120826	23.6869	0.105307	1.0763	0.0740276	>0.05
F1MAB9	F1MAB9_RAT	Protein Tpd52 (Tumor protein D52 (Predicted))	Tpd52 Tpd52_predicted rCG_41421	224	4	23.4525	0.0812501	23.4493	0.134098	0.997772	0.0778838	>0.05
F1MAK3	F1MAK3_RAT	Protein Arhgap32	Arhgap32	2086									3	19.7734	0.0725148	19.7305	0.0740526	0.970677	0.0472076	>0.05
F1MAL6	F1MAL6_RAT	Plectin (Fragment)	Plec	4557									67	26.2244	0.0508716	26.1958	0.0389114	0.980377	0.0256082	>0.05
F1MAP9	F1MAP9_RAT	E3 ubiquitin-protein ligase HUWE1	Huwe1	4181	4	23.4737	0.271253	23.4918	0.307833	1.01265	0.154782	>0.05
F1MAQ5	F1MAQ5_RAT	Microtubule-associated protein	Map2	1829	84	30.6549	0.0993276	30.6542	0.130459	0.999523	0.112338	>0.05	84	29.6255	0.115018	29.5249	0.0447386	0.932659	0.0290268	>0.05
F2Z3Q8	F2Z3Q8_RAT	Importin subunit beta-1	Kpnb1	876	13	25.5824	0.0433734	25.5988	0.0359291	1.01145	0.0233667	>0.05	13	25.0336	0.0730982	25.0779	0.0730448	1.03122	0.0480518	>0.05
F2Z3T7	F2Z3T7_RAT	Isochorismatase domain-containing protein 1	Isoc1	297									2	20.4527	0.113391	20.4757	0.0779368	1.01612	0.052664	>0.05
F2Z3T9	F2Z3T9_RAT	Protein U2af2	U2af2 LOC690372	475	4	23.1777	0.365644	23.1954	0.351183	1.0123	0.296125	>0.05	3	20.7444	0.0446864	20.744	0.0834032	0.999661	0.0543107	>0.05
F7DP80	F7DP80_RAT	Protein Ddx19a	Ddx19b Ddx19a	479									2	20.0363	0.0382868	20.1307	0.0418512	1.06762	0.0337729	>0.05
F7EPE0	F7EPE0_RAT	Sulfated glycoprotein 1	Psap	557	4	22.7381	0.223749	22.7417	0.23235	1.00247	0.164373	>0.05	3	20.383	0.182727	20.2007	0.193306	0.881336	0.119829	>0.05
F7EPH4	F7EPH4_RAT	Protein Ppa1	Ppa1	289	7	25.0144	0.155422	25.2093	0.0992651	1.14467	0.0826306	>0.05
F7EYB9	F7EYB9_RAT	Protein Omg (RCG34300)	Omg rCG_34300	443	4	27.9209	0.0690506	27.941	0.0507651	1.014	0.0373376	>0.05	5	26.3878	0.0318986	26.2749	0.0389937	0.924704	0.0250382	<0.05
F7FLF2	F7FLF2_RAT	Protein LOC100360057 (Fragment)	LOC100363800 LOC100360057 Rpl22	127	3	23.7063	0.132161	23.7522	0.167981	1.03234	0.116561	>0.05	3	22.6835	0.150609	22.6572	0.145024	0.981931	0.10997	>0.05
F8WFM2	F8WFM2_RAT	Beta-soluble NSF attachment protein	Napb	298	17	28.9189	0.0372488	28.8211	0.0506205	0.934445	0.0333034	>0.05	15	27.5921	0.0350401	27.5923	0.0555943	1.00016	0.0389506	>0.05
F8WFS9	F8WFS9_RAT	Beta-adducin	Add2	725	19	27.3639	0.0451399	27.3311	0.0245422	0.977482	0.0163825	>0.05	19	26.1123	0.0589543	26.1184	0.0565534	1.00425	0.0392035	>0.05
F8WFW5	F8WFW5_RAT	cGMP-dependent 3',5'-cyclic phosphodiesterase	Pde2a	935	20	26.6342	0.0517647	26.9767	0.0452456	1.26793	0.0336312	<0.001
G3V624	G3V624_RAT	Coronin	Coro1c RGD1564490_predicted rCG_21130	474	5	22.7447	0.174733	22.8313	0.156619	1.06183	0.120962	>0.05	5	21.8347	0.0736313	21.8682	0.0910355	1.02351	0.0619299	>0.05
G3V644	G3V644_RAT	NADH dehydrogenase (Ubiquinone) flavoprotein 3-like, isoform CRA_a (NADH dehydrogenase [ubiquinone] flavoprotein 3, mitochondrial)	Ndufv3 Ndufv3l rCG_60955	458	5	24.1808	0.108778	24.2076	0.112767	1.01879	0.0793226	>0.05	5	23.7045	0.0319232	23.7255	0.0579236	1.01461	0.0390659	>0.05
G3V647	G3V647_RAT	Protein RGD1566085 (RCG61105)	Pdxk RGD1566085 rCG_61105	312									4	21.9961	0.113102	22.1643	0.0837781	1.12362	0.0647554	>0.05
G3V664	G3V664_RAT	Protein LOC100912262	LOC100912262	921									3	23.8116	0.156542	23.5945	0.167707	0.860293	0.0915804	>0.05
G3V678	G3V678_RAT	Protein LOC100912534 (RCG36803, isoform CRA_a)	LOC100912534 RGD1565904 rCG_36803	150									2	18.4948	0.458749	18.5258	0.432609	1.02174	0.422972	>0.05
G3V6A8	G3V6A8_RAT	Golgi autoantigen, golgin subfamily b, macrogolgin 1, isoform CRA_c (Protein Golgb1)	Golgb1 rCG_52814	3187	5	22.9386	0.260976	22.8402	0.293263	0.934084	0.205006	>0.05
G3V6C0	G3V6C0_RAT	Class II, major histocompatibility complex, transactivator, isoform CRA_c (Protein Ciita)	Ciita C2ta rCG_49819	1153									2	19.7154	0.100542	19.7794	0.0764726	1.04539	0.0551458	>0.05
G3V6D3	G3V6D3_RAT	ATP synthase subunit beta (EC 3.6.3.14)	Atp5b rCG_42467	529	41	33.5084	0.0235492	33.8859	0.0277636	1.29912	0.0193462	<0.001	39	32.2483	0.027546	32.3223	0.0389466	1.05267	0.0282247	>0.05
G3V6F4	G3V6F4_RAT	O-linked N-acetylglucosamine (GlcNAc) transferase (UDP-N-acetylglucosamine:polypeptide-N-acetylglucosaminyl transferase), isoform CRA_b (UDP-N-acetylglucosamine--peptide N-acetylglucosaminyltransferase 110 kDa subunit)	Ogt rCG_36376	1036	6	22.76	0.0682756	22.7235	0.0813786	0.975021	0.0580581	>0.05
G3V6H0	G3V6H0_RAT	Protein LOC100363782 (RCG48149, isoform CRA_b) (RCG63295)	LOC100363782 Rab1b rCG_48149 rCG_63295	201	7	25.158	0.0394799	25.1127	0.0773937	0.969108	0.0532971	>0.05	6	25.4706	0.0601853	25.4511	0.0297781	0.986529	0.0209299	>0.05
G3V6H5	G3V6H5_RAT	Mitochondrial 2-oxoglutarate/malate carrier protein (Solute carrier family 25 (Mitochondrial carrier; oxoglutarate carrier), member 11, isoform CRA_b)	Slc25a11 rCG_32730	314	9	27.9028	0.0737372	27.9593	0.0479961	1.03997	0.0351694	>0.05
G3V6H9	G3V6H9_RAT	Nucleosome assembly protein 1-like 1 (RCG48740, isoform CRA_a)	Nap1l1 rCG_48740	391	4	24.3805	0.0577267	24.421	0.048604	1.02845	0.0346222	>0.05	5	23.9131	0.0443229	24.0306	0.0604871	1.0848	0.0465924	>0.05
G3V6I1	G3V6I1_RAT	Lethal(2) giant larvae protein homolog 1 (RCG33798, isoform CRA_a)	Llgl1 rCG_33798	1039									6	21.7351	0.0541072	21.761	0.05397	1.01807	0.0394111	>0.05
G3V6L4	G3V6L4_RAT	Kinesin-like protein (Fragment)	Kif5c	914	12	24.6059	0.066481	24.6309	0.0658792	1.01751	0.0452469	>0.05	15	23.4754	0.0695859	23.4341	0.0455874	0.97175	0.0310045	>0.05
G3V6L8	G3V6L8_RAT	RCG61894, isoform CRA_a (Striatin)	Strn rCG_61894	780	16	26.0309	0.159434	26.1347	0.116239	1.0746	0.0805688	>0.05	13	24.4531	0.109712	24.693	0.0548656	1.18088	0.0427681	>0.05
G3V6M3	G3V6M3_RAT	Synaptotagmin II (Synaptotagmin-2)	Syt2 rCG_46525	422	13	28.1291	0.115205	28.0165	0.0614483	0.924953	0.0397342	>0.05	8	26.7177	0.0342857	26.6741	0.0369095	0.970237	0.0244371	>0.05
G3V6P2	G3V6P2_RAT	Dihydrolipoamide S-succinyltransferase (E2 component of 2-oxo-glutarate complex), isoform CRA_a (Dihydrolipoyllysine-residue succinyltransferase component of 2-oxoglutarate dehydrogenase complex, mitochondrial)	Dlst rCG_21026	454	6	27.0363	0.0636033	27.0573	0.030542	1.01466	0.0214855	>0.05
G3V6P7	G3V6P7_RAT	Myosin, heavy polypeptide 9, non-muscle (Protein LOC100911597)	LOC100911597 Myh9 rCG_59912	1960	18	26.0764	0.0536366	26.1813	0.0368084	1.07539	0.0266115	>0.05	20	24.708	0.0367302	24.7257	0.0386801	1.01236	0.0281147	>0.05
G3V6P8	G3V6P8_RAT	Guanine nucleotide-binding protein subunit gamma	Gng12 rCG_55333	72	4	25.3667	0.080926	25.3091	0.0993555	0.960824	0.0621407	>0.05	3	23.5961	0.0791262	23.4699	0.0754691	0.916241	0.0480927	>0.05
G3V6Q3	G3V6Q3_RAT	Protein Wdr13	Wdr13	392									4	21.0421	0.102465	21.0727	0.0823206	1.02143	0.0554968	>0.05
G3V6Q6	G3V6Q6_RAT	Guanine nucleotide binding protein, alpha 11 (Guanine nucleotide-binding protein subunit alpha-11)	Gna11 rCG_29464	359	7	24.8315	0.0415016	24.8316	0.0453733	1.00004	0.0312353	>0.05	7	24.1343	0.0477032	24.194	0.044222	1.04223	0.031074	>0.05
G3V6S2	G3V6S2_RAT	Aconitate hydratase (Aconitase) (EC 4.2.1.3)	Aco1 rCG_55067	889	5	23.7924	0.0336671	23.8024	0.0303766	1.00696	0.0207206	>0.05	7	22.0864	0.0473326	22.0942	0.0366078	1.00549	0.0259174	>0.05
G3V6S8	SRSF6_RAT	Serine/arginine-rich splicing factor 6 (Pre-mRNA-splicing factor SRP55) (Splicing factor, arginine/serine-rich 6)	Srsf6 Sfrs6 Srp55	339	2	20.9503	0.131105	20.6869	0.109992	0.833109	0.0720311	>0.05
G3V6T7	G3V6T7_RAT	Protein disulfide-isomerase A4 (EC 5.3.4.1) (Endoplasmic reticulum resident protein 72)	Pdia4 rCG_52359	643	3	24.4709	0.300946	24.9312	0.185145	1.37589	0.146691	>0.05	4	24.6614	0.134203	24.5526	0.0811674	0.927361	0.05027	>0.05
G3V6U3	G3V6U3_RAT	Asparagine-linked glycosylation 2 homolog (Yeast, alpha-1,3-mannosyltransferase), isoform CRA_a (Protein Alg2)	Alg2 rCG_60347	415	6	24.0521	0.0568081	24.0509	0.0349875	0.999159	0.0251775	>0.05	7	22.0279	0.0620115	22.0111	0.0469454	0.98838	0.0336066	>0.05
G3V6X7	G3V6X7_RAT	Proprotein convertase subtilisin/kexin type 1 inhibitor (Protein LOC100911286)	Pcsk1n LOC100911286 rCG_22833	260	4	25.5173	0.222543	25.7732	0.275392	1.19405	0.382414	>0.05	4	24.8549	0.151802	24.9264	0.150893	1.05083	0.151723	>0.05
G3V6Y6	G3V6Y6_RAT	Alpha-1,4 glucan phosphorylase (EC 2.4.1.1)	Pygb rCG_37246	843	33	28.6324	0.0685719	28.6151	0.0680364	0.988069	0.0463729	>0.05	32	27.2292	0.0664014	27.1082	0.0310464	0.919554	0.0191594	>0.05
G3V728	G3V728_RAT	4-nitrophenylphosphatase domain and non-neuronal SNAP25-like protein homolog 1 (C. elegans), isoform CRA_b (Protein Nipsnap1)	Nipsnap1 rCG_35740	284	7	27.4193	0.0778913	27.4406	0.081674	1.01486	0.0627628	>0.05	4	25.8211	0.0405197	25.8797	0.0380751	1.0415	0.0273211	>0.05
G3V733	G3V733_RAT	Synapsin-2	Syn2	564	28	31.2897	0.0429142	31.6166	0.0358745	1.25436	0.025798	<0.001	26	30.1528	0.0272362	30.2363	0.0537832	1.05961	0.040639	>0.05
G3V741	G3V741_RAT	Phosphate carrier protein, mitochondrial (Solute carrier family 25 (Mitochondrial carrier; adenine nucleotide translocator), member 3, isoform CRA_c)	Slc25a3 rCG_49152	356	17	30.0469	0.030504	29.9921	0.0364926	0.962702	0.0235261	>0.05	14	28.585	0.0368703	28.5898	0.0480744	1.00332	0.0329228	>0.05
G3V746	G3V746_RAT	Glutamate receptor ionotropic, NMDA 2B (Glutamate receptor, ionotropic, N-methyl D-aspartate 2B, isoform CRA_a)	Grin2b rCG_29810	1482	5	23.0162	0.132352	23.2069	0.103408	1.14134	0.0861256	>0.05	8	22.0083	0.0675106	22.0873	0.0675409	1.05631	0.0495956	>0.05
G3V786	G3V786_RAT	Protein Akr1b8 (RCG27994)	Akr1b8 rCG_27994	316									2	23.053	0.113171	23.0592	0.0997568	1.00431	0.0659151	>0.05
G3V7B5	G3V7B5_RAT	Phosphoribosyl pyrophosphate synthase-associated protein 1 (Phosphoribosyl pyrophosphate synthetase-associated protein 1, isoform CRA_a)	Prpsap1 rCG_32490	385									3	21.9017	0.217301	21.9036	0.278601	1.00132	0.218024	>0.05
G3V7C6	G3V7C6_RAT	RCG45400 (Tubulin beta-4B chain)	Tubb4b rCG_45400	445	44	34.6321	0.0163244	34.6402	0.017037	1.00563	0.0119037	>0.05	44	33.6207	0.0130866	33.6035	0.0149097	0.988128	0.0101713	>0.05
G3V7G8	G3V7G8_RAT	Glycine--tRNA ligase (RCG52516)	Gars rCG_52516	728	7	23.8932	0.100487	23.9517	0.142093	1.04133	0.11089	>0.05
G3V7H8	G3V7H8_RAT	Human immunodeficiency virus type I enhancer-binding protein 2 homolog (RCG57266, isoform CRA_b)	Hivep2 rCG_57266	2437									3	20.3766	0.137548	20.5147	0.170333	1.10045	0.138087	>0.05
G3V7I0	G3V7I0_RAT	Peroxiredoxin 3 (Thioredoxin-dependent peroxide reductase, mitochondrial)	Prdx3 rCG_57612	257	6	27.49	0.0522174	27.5869	0.0585461	1.06946	0.0404005	>0.05
G3V7I8	G3V7I8_RAT	RCG57812, isoform CRA_b (STE20-like serine/threonine-protein kinase)	Slk rCG_57812	1203	8	23.3874	0.0680296	23.3843	0.0406645	0.997865	0.0273399	>0.05	8	24.9045	0.324645	24.9572	0.327146	1.03721	0.26945	>0.05
G3V7J0	G3V7J0_RAT	Aldehyde dehydrogenase family 6, subfamily A1, isoform CRA_b (Methylmalonate-semialdehyde dehydrogenase [acylating], mitochondrial)	Aldh6a1 rCG_20746	535	9	25.071	0.0615744	25.0778	0.0517078	1.00476	0.0397356	>0.05	9	24.4719	0.0982129	24.4464	0.0947938	0.982475	0.0669942	>0.05
G3V7L6	G3V7L6_RAT	26S protease regulatory subunit 7 (Proteasome (Prosome, macropain) 26S subunit, ATPase 2, isoform CRA_d)	Psmc2 rCG_24399	433	7	24.2209	0.0914099	24.2341	0.0904169	1.00922	0.0676503	>0.05	8	23.4794	0.0649408	23.5033	0.0501931	1.0167	0.0351146	>0.05
G3V7L8	G3V7L8_RAT	ATPase, H+ transporting, V1 subunit E isoform 1, isoform CRA_a (V-type proton ATPase subunit E 1)	Atp6v1e1 rCG_30091	226	13	28.4539	0.0476087	28.4224	0.0461251	0.978365	0.0316254	>0.05
G3V7P1	STX12_RAT	Syntaxin-12 (Syntaxin-13)	Stx12 Stx13	274	6	24.2997	0.0962526	24.3638	0.0824496	1.0454	0.0602953	>0.05	5	23.0316	0.0511772	23.01	0.0529793	0.985147	0.0341335	>0.05
G3V7T8	G3V7T8_RAT	Discs, large (Drosophila) homolog-associated protein 3, isoform CRA_b (Disks large-associated protein 3)	Dlgap3 rCG_31018	977	10	24.5589	0.100424	24.4767	0.0694141	0.944607	0.0455989	>0.05	8	22.1796	0.088928	22.3029	0.121175	1.08926	0.0995752	>0.05
G3V7U2	G3V7U2_RAT	Microtubule-associated protein 1 A, isoform CRA_c (Microtubule-associated protein 1A)	Map1a Mtap1a rCG_27021	2776	83	30.7357	0.0424497	30.7114	0.0326365	0.983266	0.0227253	>0.05	85	29.89	0.0217163	29.8697	0.0292451	0.986052	0.0196343	>0.05
G3V7U4	G3V7U4_RAT	Lamin-B1 (RCG46767, isoform CRA_c)	Lmnb1 rCG_46767	587									8	24.8069	0.239451	24.9863	0.134275	1.13236	0.0930337	>0.05
G3V7X5	G3V7X5_RAT	SPARC-like 1 (Mast9, hevin), isoform CRA_a (SPARC-like protein 1)	Sparcl1 rCG_37980	634									2	16.0925	1.10069	16.4257	0.344079	1.25979	0.270587	>0.05
G3V7Y3	G3V7Y3_RAT	ATP synthase subunit delta, mitochondrial (ATP synthase, H+ transporting, mitochondrial F1 complex, delta subunit, isoform CRA_b)	Atp5d rCG_29527	168	3	29.6491	0.0561369	29.5752	0.0463948	0.950064	0.0305915	>0.05	3	27.8166	0.0436646	27.8284	0.0423843	1.00827	0.0289818	>0.05
G3V803	G3V803_RAT	Cadherin-2 (RCG49564, isoform CRA_a)	Cdh2 rCG_49564	906	6	23.5465	0.143946	23.4513	0.161623	0.936139	0.104085	>0.05	6	21.927	0.100875	21.913	0.106222	0.990322	0.0728321	>0.05
G3V826	G3V826_RAT	Transketolase (EC 2.2.1.1)	Tkt rCG_42377	655	17	28.075	0.0663557	28.0644	0.0654243	0.992668	0.0476095	>0.05	17	26.8251	0.0447988	26.8155	0.0447275	0.993398	0.0311599	>0.05
G3V846	G3V846_RAT	Amino acid transporter	Slc1a3 rCG_50959	543	8	29.0906	0.0339754	29.0731	0.0744247	0.987906	0.0596149	>0.05
G3V851	G3V851_RAT	Solute carrier family 17 (Sodium-dependent inorganic phosphate cotransporter), member 6 (Vesicular glutamate transporter 2)	Slc17a6 rCG_53535	582	4	23.129	0.0788694	23.1308	0.10974	1.00126	0.0742605	>0.05
G3V864	G3V864_RAT	Lipid phosphate phosphatase-related protein type 4 (RCG28720)	Lppr4 rCG_28720	766	8	23.1403	0.146625	23.028	0.0928558	0.925123	0.0619164	>0.05	5	21.815	0.0599891	22.035	0.0622214	1.16475	0.049183	<0.05
G3V874	G3V874_RAT	Erythrocyte protein band 4.1-like 3, isoform CRA_b (Protein Epb41l3)	Epb41l3 Epb4.1l3 rCG_35644	963									29	26.887	0.0222644	26.8316	0.0404649	0.96236	0.0269208	>0.05
G3V881	G3V881_RAT	Leucine rich repeat neuronal 6A, isoform CRA_a (Protein Lingo1)	Lingo1 Lrrn6a rCG_57832	620									5	20.9743	0.148765	20.9674	0.136879	0.995212	0.0983195	>0.05
G3V897	G3V897_RAT	Protein Ctr9 (SH2 domain binding protein 1 (Tetratricopeptide repeat containing), isoform CRA_a)	Ctr9 Sh2bp1 rCG_40720	1173	2	22.4134	0.107146	22.3895	0.0774207	0.983572	0.060053	>0.05
G3V8A5	G3V8A5_RAT	Vacuolar protein sorting-associated protein 35	Vps35 Vps35_mapped rCG_44281	796	20	26.2039	0.0257973	26.1884	0.0324988	0.989272	0.0228102	>0.05	16	25.0218	0.0267835	25.0089	0.0310494	0.991101	0.0208481	>0.05
G3V8B6	G3V8B6_RAT	26S proteasome non-ATPase regulatory subunit 1 (Proteasome (Prosome, macropain) 26S subunit, non-ATPase, 1, isoform CRA_a)	Psmd1 rCG_23832	953	5	23.5928	0.0938626	23.7736	0.0452985	1.13345	0.0362801	>0.05
G3V8E8	G3V8E8_RAT	Guanine nucleotide-binding protein G(olf) subunit alpha	Gnal	381	11	26.7182	0.13783	27.1972	0.112699	1.39372	0.0436075	<0.001	11	24.4005	0.135857	24.4561	0.129819	1.03923	0.0833222	>0.05
G3V8F4	G3V8F4_RAT	Protein Scrn3 (Secernin 3)	Scrn3	304	2	19.8544	0.267861	19.8934	0.211228	1.02742	0.153583	>0.05
G3V8F5	G3V8F5_RAT	Mitochondrial import receptor subunit TOM40 homolog (Translocase of outer mitochondrial membrane 40 homolog (Yeast), isoform CRA_b)	Tomm40 rCG_54542	361	3	23.0194	0.0897097	23.1367	0.0554667	1.0847	0.0415617	>0.05	3	22.4857	0.0867909	22.4721	0.108035	0.990597	0.0700439	>0.05
G3V8G4	G3V8G4_RAT	Brevican core protein (Brevican, isoform CRA_a)	Bcan LOC100910284 rCG_62833	883	16	27.6586	0.0744604	27.6904	0.0721815	1.02229	0.052815	>0.05	12	26.5807	0.0506834	26.5238	0.0420714	0.961292	0.0275398	>0.05
G3V8J5	G3V8J5_RAT	PH and SEC7 domain-containing protein 1 (RCG57798, isoform CRA_b)	Psd rCG_57798	1023	2	21.5978	0.0922687	21.6138	0.109121	1.01115	0.0795707	>0.05
G3V8K2	G3V8K2_RAT	Guanine nucleotide-binding protein subunit gamma	Gng3 rCG_47413	75	4	27.3891	0.0833673	27.3758	0.0639409	0.990871	0.0502381	>0.05	5	25.4475	0.0767435	25.2303	0.0488249	0.860234	0.0307529	<0.05
G3V8L3	G3V8L3_RAT	Lamin A, isoform CRA_b (Prelamin-A/C)	Lmna rCG_62695	665	11	24.0993	0.100115	23.8977	0.104665	0.869584	0.0729347	>0.05	10	22.8119	0.0463924	22.6763	0.0482176	0.910283	0.0298118	>0.05
G3V8Q9	G3V8Q9_RAT	Adenomatosis polyposis coli, isoform CRA_a (Adenomatous polyposis coli protein)	Apc rCG_49353	2842	2	21.5661	0.229912	21.4366	0.190412	0.914178	0.109862	>0.05
G3V8R2	G3V8R2_RAT	Neurocan core protein (Protein LOC102550316) (RCG38677)	Ncan LOC100911345 LOC102550316 rCG_38677	1263	9	24.7042	0.064693	24.6926	0.061642	0.991972	0.0426206	>0.05	9	23.7616	0.041027	23.7291	0.0418798	0.977784	0.0283722	>0.05
G3V8S5	G3V8S5_RAT	Breast cancer type 1 susceptibility protein homolog (RCG34321, isoform CRA_a)	Brca1 rCG_34321	1817	3	20.1506	0.610202	19.1745	0.319722	0.508354	0.297885	>0.05
G3V8T4	G3V8T4_RAT	DNA damage-binding protein 1 (Damage-specific DNA binding protein 1)	Ddb1 rCG_47402	1140	4	23.0449	0.0539156	23.0586	0.0381823	1.00957	0.0273914	>0.05
G3V8T5	G3V8T5_RAT	Protein Ruvbl2 (RuvB-like 2 (E. coli))	Ruvbl2 rCG_53569	463	3	21.9898	0.120608	21.8084	0.0803948	0.881852	0.0486343	>0.05
G3V8V3	G3V8V3_RAT	Alpha-1,4 glucan phosphorylase (EC 2.4.1.1)	Pygm rCG_48197	842									20	25.7756	0.0644744	25.6433	0.0737157	0.912354	0.0470891	>0.05
G3V912	G3V912_RAT	Protein Tmx4 (Thioredoxin domain containing 13)	Tmx4 Txndc13 rCG_26888	336	3	22.0832	0.136273	22.0711	0.142905	0.991648	0.116589	>0.05	3	20.3647	0.189344	20.3665	0.106622	1.00123	0.0835685	>0.05
G3V918	G3V918_RAT	Phosphoribosylglycinamide formyltransferase, isoform CRA_a (Protein Gart)	Gart rCG_58778	1010	4	22.7277	0.0764459	22.7621	0.063066	1.02411	0.042404	>0.05	5	21.8568	0.0612913	21.7859	0.0504668	0.952035	0.0338926	>0.05
G3V928	G3V928_RAT	Protein Lrp1 (RCG59548)	Lrp1 rCG_59548	4545	3	22.9438	0.323697	22.8692	0.279032	0.949614	0.199598	>0.05	5	19.9965	0.109667	19.9455	0.0714027	0.965288	0.0484294	>0.05
G3V936	G3V936_RAT	Citrate synthase	Cs rCG_42519	466	19	30.1154	0.0295109	30.1283	0.0424503	1.00899	0.0300459	>0.05	18	28.7058	0.0352403	28.7642	0.0209499	1.04126	0.0149463	>0.05
G3V940	G3V940_RAT	Coronin	Coro1b rCG_48535	484	6	24.9493	0.15865	24.9701	0.14819	1.01457	0.106188	>0.05	6	23.4523	0.10739	23.4294	0.0909917	0.984275	0.0654643	>0.05
G3V945	G3V945_RAT	Aldehyde dehydrogenase family 5, subfamily A1 (Succinate-semialdehyde dehydrogenase, mitochondrial)	Aldh5a1 rCG_45159	523	19	28.4075	0.06532	28.4064	0.0598827	0.999214	0.0424892	>0.05	16	26.792	0.0929396	26.86	0.086723	1.04826	0.0668815	>0.05
G3V949	G3V949_RAT	CAP-Gly domain-containing linker protein 2 (Cytoplasmic linker 2)	Clip2 Cyln2 rCG_21414	1047	9	23.646	0.154673	23.4557	0.138708	0.876388	0.0955115	>0.05	10	22.3701	0.0662795	22.1806	0.0476433	0.876875	0.0287629	<0.05
G3V964	G3V964_RAT	Neurotrimin (RCG22798)	Ntm rCG_22798	344	6	27.8448	0.0574595	27.8063	0.0718272	0.973635	0.0479441	>0.05	6	27.0136	0.0388179	27.0554	0.0600404	1.02938	0.0462238	>0.05
G3V984	G3V984_RAT	Protein bassoon (RCG25274, isoform CRA_a)	Bsn rCG_25274	3933	65	28.2289	0.046774	28.1563	0.0364469	0.950957	0.0234899	>0.05	61	27.0121	0.0832898	26.9454	0.0452295	0.95477	0.0306621	>0.05
G3V9D7	G3V9D7_RAT	Adducin 3 (Gamma), isoform CRA_a (Gamma-adducin)	Add3 rCG_57421	705	9	24.8709	0.0409152	24.9067	0.0511857	1.02517	0.0386197	>0.05
G3V9G1	G3V9G1_RAT	Adenylate cyclase 5 (Adenylate cyclase type 5)	Adcy5 rCG_52683	1262									12	25.67	0.16203	25.3421	0.0875262	0.796649	0.0432074	<0.05
G3V9L3	G3V9L3_RAT	MAGUK p55 subfamily member 3	Dusp3 LOC100365414	192	4	25.8408	0.0732684	25.8137	0.0880366	0.981417	0.0507892	>0.05
G3V9N8	G3V9N8_RAT	AP-1 complex subunit beta-1 (Adaptor protein complex AP-1, beta 1 subunit, isoform CRA_b)	Ap1b1 rCG_35796	942	29	28.549	0.0420285	28.585	0.042533	1.02531	0.0304672	>0.05	26	27.9324	0.076282	27.962	0.0691251	1.02075	0.0475614	>0.05
G3V9Q3	G3V9Q3_RAT	Heterogeneous nuclear ribonucleoprotein H (Heterogeneous nuclear ribonucleoprotein H1, isoform CRA_b)	Hnrnph1 Hnrph1 rCG_32746	449	6	26.4893	0.0323265	26.4554	0.052996	0.976793	0.0374147	>0.05	7	25.6443	0.0337423	25.71	0.030714	1.04652	0.0217266	>0.05
G3V9R8	G3V9R8_RAT	Heterogeneous nuclear ribonucleoprotein C (Heterogeneous nuclear ribonucleoprotein C (C1/C2))	Hnrnpc LOC100911576	298	4	22.5948	0.0885897	22.4584	0.0911856	0.909792	0.0559131	>0.05	5	22.1612	0.0572147	22.1872	0.0624202	1.0182	0.045081	>0.05
G3V9T7	G3V9T7_RAT	ATPase Asna1 (EC 3.6.-.-) (Arsenical pump-driving ATPase) (Arsenite-stimulated ATPase)	Asna1 rCG_51373	348	5	23.8794	0.0381995	23.8366	0.0347074	0.970771	0.0244737	>0.05	6	22.4777	0.0343461	22.5063	0.0340507	1.02007	0.0239206	>0.05
G3V9Y1	G3V9Y1_RAT	Myosin, heavy polypeptide 10, non-muscle, isoform CRA_b (Myosin-10)	Myh10 rCG_34638	1976	58	31.2675	0.0841453	31.3312	0.100861	1.04511	0.0727902	>0.05	54	29.9301	0.1025	29.901	0.0660633	0.980014	0.0480101	>0.05
G3V9Z6	G3V9Z6_RAT	Septin 8 (Predicted) (Septin-8)	Sept8 Sept8_predicted rCG_33165	429	16	27.103	0.0884271	27.1341	0.0831956	1.02179	0.0535772	>0.05	15	25.6663	0.080047	25.7021	0.110593	1.02516	0.0841731	>0.05
H1UBM5	H1UBM5_RAT	Copine 6 protein	Cpne6	552	10	23.1776	0.103405	23.2555	0.112639	1.05549	0.0856783	>0.05
H1UBN0	H1UBN0_RAT	Copine 7 protein	Cpne7	556	3	21.6614	0.183866	22.0565	0.0870153	1.31504	0.0817053	>0.05
I6L9G6	I6L9G6_RAT	Protein Tardbp (RCG31562, isoform CRA_c) (Tardbp protein)	Tardbp rCG_31562	285	6	23.1509	0.109455	23.0803	0.0863858	0.952293	0.0556367	>0.05	4	21.6564	0.0740495	21.64	0.0757276	0.988661	0.054505	>0.05
I6LBW4	I6LBW4_RAT	Protocadherin alpha 13 (RCG49388, isoform CRA_c)	Pcdha13 rCG_49388	950									3	21.4365	0.155413	21.4828	0.178081	1.03258	0.129545	>0.05
M0R3R6	M0R3R6_RAT	Protein LOC100911677	LOC100911677	617									2	17.6326	0.274195	17.6552	0.210751	1.0158	0.172668	>0.05
M0R3X6	M0R3X6_RAT	Carbonyl reductase [NADPH] 1	Cbr1	277	6	26.4318	0.0388408	27.0953	0.0733902	1.58393	0.037867	<0.01
M0R4G7	M0R4G7_RAT	Protein Iqsec1	Iqsec1 LOC686590	962	11	24.6066	0.0706481	24.5204	0.0630139	0.942034	0.0453198	>0.05
M0R544	M0R544_RAT	Glucosidase, alpha, acid, isoform CRA_a (Lysosomal alpha-glucosidase)	Gaa rCG_33228	953	3	22.706	0.102223	22.6878	0.0660275	0.987445	0.0466735	>0.05	2	20.4408	0.0784936	20.6936	0.0557098	1.19149	0.0472899	<0.05
M0R557	M0R557_RAT	Protein Cmya5 (Fragment)	Cmya5	3702									3	16.457	0.104503	16.0346	0.360521	0.746194	0.157372	>0.05
M0R5C6	M0R5C6_RAT	Protein Iqsec1	Iqsec1 LOC686590	1099									6	22.9771	0.102769	22.8617	0.120027	0.923151	0.0797995	>0.05
M0R5M1	M0R5M1_RAT	Protein Ptprd (Fragment)	Ptprd	1887	9	24.0021	0.0215788	23.9677	0.0306214	0.976417	0.0202798	>0.05
M0R5N4	M0R5N4_RAT	Prefoldin subunit 4	Pfdn4 LOC100366237 rCG_32197	134									2	21.0985	0.148311	21.1439	0.122968	1.03192	0.0886025	>0.05
M0R618	M0R618_RAT	Protein Etl4 (Fragment)	Etl4	1981	5	21.4496	0.113237	21.2169	0.11153	0.850991	0.0735917	>0.05
M0R660	M0R660_RAT	Glyceraldehyde-3-phosphate dehydrogenase (EC 1.2.1.12)	RGD1565368	333	23	33.2945	0.015719	32.7214	0.0317632	0.672185	0.0213696	<0.001	26	32.1849	0.0148173	31.6045	0.0178853	0.668762	0.0126382	<0.01
M0R686	M0R686_RAT	Protein Irgq	Irgq	582	2	21.5112	0.217936	21.8714	0.171284	1.28368	0.157719	>0.05	3	21.326	0.0533023	21.3505	0.0539613	1.01714	0.0388445	>0.05
M0R6L4	M0R6L4_RAT	40S ribosomal protein S3a	LOC100365839 Rps3a	264									6	23.5424	0.053073	23.5117	0.0832046	0.978898	0.0542997	>0.05
M0R6N2	M0R6N2_RAT	Protein LOC100910481	LOC100910481	338									3	20.5534	0.0678702	20.5386	0.0443593	0.989728	0.0312153	>0.05
M0R6Y8	M0R6Y8_RAT	Phosphoglycerate kinase (EC 2.7.2.3)	RGD1560402	395									13	29.0721	0.0338808	29.1103	0.0277949	1.02686	0.020016	>0.05
M0R776	M0R776_RAT	Protein Mrps36 (RCG44686, isoform CRA_a)	Mrps36 rCG_44686	103	3	23.2591	0.121267	23.3787	0.0754941	1.08644	0.059236	>0.05	4	22.4902	0.154718	22.2616	0.0928785	0.85345	0.0560658	>0.05
M0R7F3	M0R7F3_RAT	Protein Wasf3	Wasf3	501	4	22.976	0.11046	22.8764	0.113481	0.933336	0.0784864	>0.05	3	20.793	0.061747	20.7406	0.0456238	0.964303	0.0304209	>0.05
M0R7G4	M0R7G4_RAT	Protein Apoo	Apoo	198									3	24.5253	0.0417049	24.6382	0.0411815	1.08144	0.0305371	>0.05
M0R7K7	M0R7K7_RAT	Uncharacterized protein	0	198	3	24.3674	0.038562	24.3119	0.0907511	0.96226	0.0620732	>0.05
M0R7P0	M0R7P0_RAT	Protein LOC100912027	LOC100912027	136									2	21.4056	0.113448	21.3877	0.0448596	0.987681	0.0320946	>0.05
M0R7U1	M0R7U1_RAT	Protein Ak5 (RCG28422)	Ak5 rCG_28422	562									3	21.2011	0.144515	20.7335	0.156945	0.723199	0.0564701	<0.05
M0R7V3	M0R7V3_RAT	Protein Apoo	Apoo	198	4	25.3444	0.0570391	25.3476	0.0587512	1.00216	0.0394344	>0.05
M0R7Z8	M0R7Z8_RAT	Protein Adam22	Adam22	909	11	25.0909	0.058872	24.9971	0.0492241	0.937071	0.0320568	>0.05
M0R809	M0R809_RAT	Guanine nucleotide-binding protein subunit gamma	Gng4 rCG_19927	75	3	24.1493	0.288151	24.3195	0.243212	1.12521	0.226793	>0.05	2	21.7173	0.265565	21.5772	0.198903	0.907462	0.139397	>0.05
M0R8U1	M0R8U1_RAT	Protein Dnah5	Dnah5	3470									3	26.2258	0.17271	26.0483	0.110545	0.884232	0.0764818	>0.05
M0R961	M0R961_RAT	Far upstream element-binding protein 2 (KH-type splicing regulatory protein, isoform CRA_b)	Khsrp rCG_45039	721									7	23.1757	0.0594191	23.2423	0.0396066	1.04728	0.0289345	>0.05
M0R991	M0R991_RAT	Protein Nktr (Fragment)	Nktr LOC100364165	1372	2	21.316	0.106297	21.2417	0.0838298	0.94985	0.061482	>0.05
M0R9D0	M0R9D0_RAT	Acidic leucine-rich nuclear phosphoprotein 32 family member A	Anp32a LOC100909983	245									4	23.6545	0.0412633	23.6857	0.0289547	1.02186	0.0205825	>0.05
M0R9D5	M0R9D5_RAT	Protein Ahnak	Ahnak	5363	6	23.5308	0.14118	23.8515	0.112943	1.24891	0.0961603	>0.05	8	22.4206	0.138415	22.4348	0.146123	1.0099	0.0898161	>0.05
M0R9D9	M0R9D9_RAT	Uncharacterized protein (Fragment)	0	209									2	19.5065	0.0837864	19.4679	0.0804986	0.973611	0.0561163	>0.05
M0R9I8	M0R9I8_RAT	40S ribosomal protein S12	LOC100364427	132	4	23.6352	0.07371	23.6899	0.0705349	1.03859	0.0553819	>0.05	4	22.9505	0.0631703	22.8783	0.0736875	0.951199	0.0486899	>0.05
M0R9L0	M0R9L0_RAT	Protein Naca	Naca	2163	4	23.3138	0.121795	23.3873	0.0893535	1.05226	0.0681726	>0.05	5	25.7193	0.0909738	25.7329	0.0852884	1.0095	0.0603333	>0.05
M0R9X8	M0R9X8_RAT	Cytoplasmic dynein 1 heavy chain 1	Dync1h1	4645	116	29.1181	0.0473736	29.1087	0.0617179	0.993501	0.0438428	>0.05	109	27.925	0.0278794	27.9105	0.0304496	0.989986	0.0208604	>0.05
M0RA80	M0RA80_RAT	Protein Tnc	Tnc	2018									2	19.4709	0.22592	19.5718	0.125336	1.07239	0.0958625	>0.05
M0RAK8	M0RAK8_RAT	Protein LOC100912386 (Fragment)	LOC100912386	122	2	22.923	0.373901	23.0097	0.242682	1.06194	0.198868	>0.05
M0RAS4	M0RAS4_RAT	Protein Igsf21 (Fragment)	Igsf21	327	2	20.8232	0.147277	20.6256	0.17183	0.871995	0.121299	>0.05
M0RAX7	M0RAX7_RAT	Uncharacterized protein (Fragment)	0	278									2	15.1112	1.71332	14.442	1.58977	0.628841	1.40788	>0.05
M0RB26	M0RB26_RAT	Protein Gareml	Gareml	879	2	23.5569	0.189875	23.3957	0.104129	0.894285	0.0582594	>0.05
M0RB63	M0RB63_RAT	Protein LOC684509 (RCG63041)	LOC684509 rCG_63041	84									2	23.9546	0.0682814	23.9972	0.0726341	1.02992	0.0542057	>0.05
M0RBF1	M0RBF1_RAT	Complement C3 (RCG45082)	C3 rCG_45082	1663									3	23.7015	0.139396	23.6162	0.12677	0.942601	0.0867673	>0.05
M0RBH6	M0RBH6_RAT	Uncharacterized protein (Fragment)	0	320	4	30.3185	0.0776386	30.2483	0.0470873	0.952483	0.0317818	>0.05	5	29.4564	0.0442853	29.4597	0.044991	1.00234	0.0325649	>0.05
M0RBJ0	M0RBJ0_RAT	Guanine nucleotide-binding protein subunit gamma (Fragment)	Gng2	58	2	27.2176	0.143345	27.1761	0.175112	0.97166	0.134002	>0.05
M0RBL8	M0RBL8_RAT	Protein Tceal6	Tceal6 LOC679974 Tceal3	199	3	26.9827	0.0855237	26.6193	0.257586	0.777333	0.0857023	>0.05	4	25.7685	0.163222	25.7407	0.142487	0.980914	0.103646	>0.05
M0RC17	M0RC17_RAT	Protein Chl1 (Fragment)	Chl1	1081									3	20.2113	0.115283	20.3742	0.128881	1.11957	0.112685	>0.05
M0RC57	M0RC57_RAT	Protein unc-45 homolog A	Smap1 LOC684800	440	3	24.3571	0.0983936	24.2675	0.0940557	0.939786	0.0625023	>0.05	3	23.5726	0.0348387	23.5957	0.0175842	1.01615	0.0124581	>0.05
M0RC58	M0RC58_RAT	Protein Dpy19l2	Dpy19l2 Dyp19l2	773	2	20.549	0.0917315	20.6328	0.0569304	1.05979	0.0407491	>0.05
M0RC65	M0RC65_RAT	Cofilin 2, muscle (Predicted), isoform CRA_b (Protein Cfl2)	Cfl2 Cfl2_predicted rCG_62072	166	7	29.0279	0.0537672	28.8945	0.0407559	0.911687	0.0275565	>0.05	6	27.5328	0.0240119	27.5668	0.0271091	1.02382	0.0193534	>0.05
M0RC99	RAB5A_RAT	Ras-related protein Rab-5A (Small GTP-binding protein rab5)	Rab5a	215	5	25.1826	0.0711789	25.0806	0.0562831	0.931738	0.0385919	>0.05	4	23.5381	0.0624949	23.5731	0.0295738	1.02453	0.021491	>0.05
M0RCB8	M0RCB8_RAT	Uncharacterized protein (Fragment)	LOC690171	139	3	28.6698	0.0473425	28.7964	0.082238	1.09166	0.0615892	>0.05
M0RCL5	M0RCL5_RAT	Histone H2A	LOC100910554	130									3	29.7732	0.0427207	29.7533	0.0348069	0.986279	0.0240192	>0.05
M0RCU1	M0RCU1_RAT	Protein Adam22	Adam22	940									9	23.5969	0.035537	23.568	0.0485866	0.980154	0.033781	>0.05
M0RD40	M0RD40_RAT	Protein Sik3	Sik3 LOC684112	1366	4	22.0818	0.0665263	21.9541	0.10264	0.915297	0.0589533	>0.05	3	21.2303	0.0768573	21.2762	0.0884616	1.03227	0.0626359	>0.05
M0RDI5	M0RDI5_RAT	Protein Mcu (Similar to CG18769-PB, isoform B, isoform CRA_b)	Mcu LOC294560 rCG_22037	350	3	22.0721	0.176166	22.0964	0.17966	1.01701	0.141749	>0.05
M0RDJ7	M0RDJ7_RAT	Protein Tceal5 (RCG20041, isoform CRA_a)	Tceal5 rCG_20041	200	3	24.9204	0.0718359	24.5758	0.107933	0.787532	0.0561375	<0.05
M0RDK9	M0RDK9_RAT	Protein Acad8 (Fragment)	Acad8	311									2	19.3825	0.0826396	19.4216	0.0790612	1.02744	0.0551193	>0.05
M0RDR7	M0RDR7_RAT	Protein LOC100911132	LOC100911132	775	2	22.2533	0.120345	22.4382	0.101389	1.13679	0.0773636	>0.05	4	26.0534	0.135971	25.9967	0.0497929	0.961463	0.033184	>0.05
M9MMM9	M9MMM9_RAT	Microtubule-actin cross-linking factor 1	Macf1	5430									18	23.0706	0.0489568	23.1018	0.0509428	1.02187	0.0369646	>0.05
O08557	DDAH1_RAT	N(G),N(G)-dimethylarginine dimethylaminohydrolase 1 (DDAH-1) (Dimethylarginine dimethylaminohydrolase 1) (EC 3.5.3.18) (DDAHI) (Dimethylargininase-1)	Ddah1 Ddah	285	12	26.1908	0.0320533	26.1965	0.0534212	1.00399	0.0371671	>0.05	14	24.7514	0.0448644	24.7204	0.0570447	0.978707	0.0399559	>0.05
O08618	KPRB_RAT	Phosphoribosyl pyrophosphate synthase-associated protein 2 (PRPP synthase-associated protein 2) (41 kDa phosphoribosypyrophosphate synthetase-associated protein) (PAP41)	Prpsap2	369	4	23.6724	0.0850295	23.8299	0.0586199	1.11534	0.0441512	>0.05	6	23.5651	0.103039	23.5863	0.14817	1.01478	0.108741	>0.05
O08619	F13A_RAT	Coagulation factor XIII A chain (Coagulation factor XIIIa) (EC 2.3.2.13) (Protein-glutamine gamma-glutamyltransferase A chain) (Transglutaminase A chain)	F13a1 F13a	732									3	20.341	0.113558	20.4343	0.100739	1.06681	0.0708657	>0.05
O08629	TIF1B_RAT	Transcription intermediary factor 1-beta (TIF1-beta) (E3 SUMO-protein ligase TRIM28) (EC 6.3.2.-) (KRAB-associated protein 1) (Nuclear corepressor KAP-1) (Tripartite motif-containing protein 28)	Trim28 Kap1 Tif1b	835	3	21.4469	0.170589	21.6797	0.0818899	1.17516	0.0685953	>0.05	4	21.9602	0.0407347	22.0319	0.0566964	1.05095	0.0415988	>0.05
O08651	SERA_RAT	D-3-phosphoglycerate dehydrogenase (3-PGDH) (EC 1.1.1.95)	Phgdh	533	15	26.8294	0.0471988	26.7909	0.065222	0.973696	0.0481294	>0.05	14	25.6848	0.0729424	25.6672	0.0458188	0.98786	0.0317898	>0.05
O08662	PI4KA_RAT	Phosphatidylinositol 4-kinase alpha (PI4-kinase alpha) (PI4K-alpha) (PtdIns-4-kinase alpha) (EC 2.7.1.67)	Pi4ka Pik4ca	2041									5	21.8376	0.15102	21.9136	0.116056	1.05412	0.0806515	>0.05
O08679	MARK2_RAT	Serine/threonine-protein kinase MARK2 (EC 2.7.11.1) (EC 2.7.11.26) (ELKL motif kinase 1) (EMK-1) (MAP/microtubule affinity-regulating kinase 2)	Mark2	722	4	24.2549	0.0584523	24.2992	0.0760855	1.03114	0.0569763	>0.05	5	22.9301	0.0387433	23.0188	0.0386211	1.06343	0.0292234	>0.05
O08719	EVL_RAT	Ena/VASP-like protein (Ena/vasodilator-stimulated phosphoprotein-like)	Evl Rnb6	393	2	23.287	0.102475	23.4787	0.126109	1.14214	0.105041	>0.05
O08816	WASL_RAT	Neural Wiskott-Aldrich syndrome protein (N-WASP)	Wasl	501	3	21.1987	0.135897	21.1889	0.122447	0.993256	0.0843371	>0.05
O08838	AMPH_RAT	Amphiphysin	Amph Amph1	683	21	28.1234	0.0580543	28.0442	0.0742235	0.946605	0.0500344	>0.05
O08839	BIN1_RAT	Myc box-dependent-interacting protein 1 (Amphiphysin II) (Amphiphysin-like protein) (Bridging integrator 1)	Bin1 Amph2 Amphl	588	21	27.8434	0.0348516	27.8004	0.0537376	0.970604	0.0393067	>0.05	18	26.584	0.0312754	26.4512	0.0440461	0.912087	0.0287092	<0.05
O08873	MADD_RAT	MAP kinase-activating death domain protein (Rab3 GDP/GTP exchange factor)	Madd	1602	5	22.1009	0.0636017	22.0762	0.0566849	0.982995	0.0391187	>0.05	5	21.2655	0.0378383	21.2841	0.0497753	1.01301	0.0361934	>0.05
O08875	DCLK1_RAT	Serine/threonine-protein kinase DCLK1 (EC 2.7.11.1) (Calcium/calmodulin-dependent protein kinase type I-like CPG16) (Doublecortin-like and CAM kinase-like 1) (Doublecortin-like kinase 1)	Dclk1 Cpg16 Dcamkl1	433	6	25.2501	0.102152	25.2044	0.168291	0.968766	0.151382	>0.05	7	24.1559	0.108886	24.0599	0.0807905	0.935618	0.0556251	>0.05
O35049	NSMA2_RAT	Sphingomyelin phosphodiesterase 3 (EC 3.1.4.12) (Confluent 3Y1 cell-associated protein 1) (Neutral sphingomyelinase 2) (nSMase-2) (nSMase2) (Neutral sphingomyelinase II)	Smpd3 Cca1	655	4	22.5258	0.0937572	22.6039	0.0863376	1.05565	0.0613514	>0.05	4	22.1349	0.174187	22.1229	0.148762	0.991678	0.139633	>0.05
O35077	GPDA_RAT	Glycerol-3-phosphate dehydrogenase [NAD(+)], cytoplasmic (GPD-C) (GPDH-C) (EC 1.1.1.8)	Gpd1	349	14	26.0533	0.137522	25.9191	0.128176	0.911183	0.0783007	>0.05	10	24.0223	0.111706	23.6002	0.137541	0.74634	0.0436299	<0.05
O35094	TIM44_RAT	Mitochondrial import inner membrane translocase subunit TIM44	Timm44 Mimt44 Tim44	453	2	21.593	0.0834249	21.4087	0.0979306	0.880091	0.0640581	>0.05
O35095	NCDN_RAT	Neurochondrin (Neurite outgrowth-related protein from the rat brain) (Norbin)	Ncdn	729	22	28.6494	0.0553949	28.7377	0.0380014	1.06309	0.0284082	>0.05	20	27.2707	0.0653664	27.2877	0.0516865	1.01184	0.0372604	>0.05
O35112	CD166_RAT	CD166 antigen (Activated leukocyte cell adhesion molecule) (HB2) (KG-CAM) (Protein MEMD) (SB-10 antigen) (CD antigen CD166)	Alcam	583	8	25.0846	0.101548	25.2889	0.0639457	1.15214	0.0535584	>0.05	9	23.5503	0.0829465	23.6215	0.066127	1.05059	0.0484813	>0.05
O35179	SH3G2_RAT	Endophilin-A1 (Endophilin-1) (SH3 domain protein 2A) (SH3 domain-containing GRB2-like protein 2) (SH3p4)	Sh3gl2 Sh3d2a Sh3p4	352	19	28.8878	0.0445467	28.8794	0.0384175	0.99416	0.0262707	>0.05	16	27.9388	0.0356923	27.8945	0.0123525	0.96973	0.00824081	>0.05
O35180	SH3G3_RAT	Endophilin-A3 (Endophilin-3) (SH3 domain protein 2C) (SH3 domain-containing GRB2-like protein 3) (SH3p13)	Sh3gl3 Sh3d2c1 Sh3p13	347	6	23.3632	0.057902	23.4089	0.0750985	1.03216	0.0533511	>0.05	6	21.4658	0.0429604	21.5049	0.0686589	1.02743	0.0512816	>0.05
O35244	PRDX6_RAT	Peroxiredoxin-6 (EC 1.11.1.15) (1-Cys peroxiredoxin) (1-Cys PRX) (Acidic calcium-independent phospholipase A2) (aiPLA2) (EC 3.1.1.-) (Antioxidant protein 2) (Non-selenium glutathione peroxidase) (NSGPx) (EC 1.11.1.9) (Thiol-specific antioxidant protein)	Prdx6 Aipla2 Aop2 Tsa	224	16	27.8126	0.0467346	27.879	0.0368718	1.04707	0.0263944	>0.05	15	26.4338	0.0387061	26.4934	0.0402984	1.04215	0.0295803	>0.05
O35264	PA1B2_RAT	Platelet-activating factor acetylhydrolase IB subunit beta (EC 3.1.1.47) (PAF acetylhydrolase 30 kDa subunit) (PAF-AH 30 kDa subunit) (PAF-AH subunit beta) (PAFAH subunit beta) (Platelet-activating factor acetylhydrolase alpha 2 subunit) (PAF-AH alpha 2)	Pafah1b2 Pafahb	229	9	24.9529	0.0858594	24.9477	0.0306053	0.996347	0.0211963	>0.05	7	24.1242	0.105274	24.0869	0.0825923	0.974503	0.0550816	>0.05
O35274	NEB2_RAT	Neurabin-2 (Neurabin-II) (Neural tissue-specific F-actin-binding protein II) (PP1bp134) (Protein phosphatase 1 regulatory subunit 9B) (Spinophilin) (p130)	Ppp1r9b	817	12	25.0483	0.0685636	24.9965	0.0470105	0.964781	0.0327707	>0.05	13	23.4688	0.0326154	23.6235	0.0472353	1.11315	0.036532	<0.05
O35303	DNM1L_RAT	Dynamin-1-like protein (EC 3.6.5.5) (Dynamin-like protein)	Dnm1l Dlp1	755	33	27.8899	0.049903	28.375	0.0347769	1.39973	0.0254188	<0.001	29	26.7867	0.0407642	26.7869	0.0382509	1.0001	0.026789	>0.05
O35314	SCG1_RAT	Secretogranin-1 (Chromogranin-B) (CgB) (Glucagonoma peptide) (Secretogranin-I) (SgI) [Cleaved into: CCB peptide short form; CCB peptide long form]	Chgb	675	5	22.8954	0.09879	22.9135	0.120371	1.01267	0.101129	>0.05	3	21.609	0.125158	21.637	0.0898177	1.01961	0.0567285	>0.05
O35331	PDXK_RAT	Pyridoxal kinase (EC 2.7.1.35) (Pyridoxine kinase)	Pdxk Pkh	312	5	23.4404	0.0680211	23.8935	0.0735864	1.369	0.0346757	<0.001
O35353	GBB4_RAT	Guanine nucleotide-binding protein subunit beta-4 (Transducin beta chain 4)	Gnb4	340	6	28.3901	0.0680638	28.4204	0.0864137	1.02121	0.0627219	>0.05	5	27.1348	0.101538	27.0835	0.0578859	0.965026	0.0388083	>0.05
O35413	SRBS2_RAT	Sorbin and SH3 domain-containing protein 2 (Arg/Abl-interacting protein 2) (ArgBP2) (Neural ArgBP2) (nArgBP2) (Sorbin)	Sorbs2 Argbp2	1196									3	18.7996	0.355117	18.5663	0.339142	0.850724	0.233537	>0.05
O35458	VIAAT_RAT	Vesicular inhibitory amino acid transporter (GABA and glycine transporter) (Solute carrier family 32 member 1) (Vesicular GABA transporter) (rGVAT)	Slc32a1 Vgat Viaat	525	7	23.6647	0.0711967	23.8731	0.141864	1.15539	0.147908	>0.05	4	22.2604	0.124489	22.3385	0.106916	1.05567	0.0922883	>0.05
O35509	RB11B_RAT	Ras-related protein Rab-11B	Rab11b	218	9	26.2205	0.05393	26.1195	0.0471322	0.932406	0.0312497	>0.05	10	25.5661	0.0390098	25.5242	0.0228512	0.971378	0.0153298	>0.05
O35550	RABE1_RAT	Rab GTPase-binding effector protein 1 (Rabaptin-5) (Rabaptin-5alpha)	Rabep1 Rabpt5 Rabpt5a	862									7	20.922	0.0649986	21.0056	0.0642458	1.05966	0.0481203	>0.05
O35567	PUR9_RAT	Bifunctional purine biosynthesis protein PURH [Includes: Phosphoribosylaminoimidazolecarboxamide formyltransferase (EC 2.1.2.3) (5-aminoimidazole-4-carboxamide ribonucleotide formyltransferase) (AICAR transformylase); IMP cyclohydrolase (EC 3.5.4.10) (ATIC) (IMP synthase) (Inosinicase)]	Atic Purh	592	12	25.1614	0.05111	25.4879	0.0352286	1.25395	0.0258101	<0.001	19	24.4212	0.0994766	24.4995	0.0609487	1.05581	0.0435064	>0.05
O35764	NPTXR_RAT	Neuronal pentraxin receptor	Nptxr Npr	494	3	22.5267	0.121424	22.4275	0.139777	0.933586	0.11291	>0.05
O35796	C1QBP_RAT	Complement component 1 Q subcomponent-binding protein, mitochondrial (GC1q-R protein) (Glycoprotein gC1qBP) (C1qBP)	C1qbp Gc1qbp	279	4	27.8015	0.0925002	27.892	0.0815289	1.06478	0.0522524	>0.05	5	26.6732	0.0493555	26.8099	0.0910354	1.09941	0.0715935	>0.05
O35814	STIP1_RAT	Stress-induced-phosphoprotein 1 (STI1) (Hsc70/Hsp90-organizing protein) (Hop)	Stip1 Hop	543	21	27.4355	0.0237477	27.4384	0.0468549	1.00201	0.0332809	>0.05	22	26.4901	0.0340692	26.4959	0.0228927	1.00401	0.0164502	>0.05
O35828	CORO7_RAT	Coronin-7 (Crn7) (70 kDa WD repeat tumor rejection antigen)	Coro7	922	8	23.4166	0.10751	23.4524	0.0863978	1.02512	0.060729	>0.05	4	20.9554	0.107391	21.207	0.0635868	1.19049	0.0516419	>0.05
O35832	CKD18_RAT	Cyclin-dependent kinase 18 (EC 2.7.11.22) (Cell division protein kinase 18) (PCTAIRE-motif protein kinase 3) (Serine/threonine-protein kinase PCTAIRE-3)	Cdk18 Pctaire3 Pctk3	451	4	21.282	0.113356	21.2669	0.0498928	0.989577	0.034092	>0.05
O35867	NEB1_RAT	Neurabin-1 (Neurabin-I) (Neural tissue-specific F-actin-binding protein I) (PP1bp175) (Protein phosphatase 1 regulatory subunit 9A) (p180)	Ppp1r9a	1095	23	26.8074	0.077695	27.2788	0.0499627	1.38642	0.0323669	<0.001	20	26.0686	0.0684125	26.1502	0.0908477	1.05821	0.0781623	>0.05
O35964	SH3G1_RAT	Endophilin-A2 (Endophilin-2) (SH3 domain protein 2B) (SH3 domain-containing GRB2-like protein 1) (SH3p8)	Sh3gl1 Sh3p8	368	11	27.5421	0.104402	27.4701	0.0894915	0.951285	0.0576667	>0.05	11	26.5815	0.0388161	26.5007	0.0435976	0.945508	0.0294871	>0.05
O35987	NSF1C_RAT	NSFL1 cofactor p47 (XY body-associated protein XY40) (p97 cofactor p47)	Nsfl1c	370	12	26.3856	0.0332833	26.4494	0.0474399	1.04515	0.0344371	>0.05	10	25.1086	0.0686633	25.1976	0.0303272	1.06359	0.0221519	>0.05
O54924	EXOC8_RAT	Exocyst complex component 8 (Exocyst complex 84 kDa subunit)	Exoc8 Exo84	716	2	21.5165	0.17025	21.4772	0.157734	0.973086	0.117796	>0.05	3	21.0603	0.104392	21.106	0.123727	1.03218	0.0903544	>0.05
O54975	XPP1_RAT	Xaa-Pro aminopeptidase 1 (EC 3.4.11.9) (Aminoacylproline aminopeptidase) (Cytosolic aminopeptidase P) (Soluble aminopeptidase P) (sAmp) (X-Pro aminopeptidase 1) (X-prolyl aminopeptidase 1, soluble) [Cleaved into: Xaa-Pro aminopeptidase 1, N-terminally processed]	Xpnpep1 App	623	7	24.9551	0.320965	25.2964	0.249604	1.26692	0.205787	>0.05	6	22.0704	0.0486638	22.1174	0.0500707	1.03312	0.0352817	>0.05
O55012	PICAL_RAT	Phosphatidylinositol-binding clathrin assembly protein (Clathrin assembly lymphoid myeloid leukemia protein) (rCALM)	Picalm Calm	640									9	25.7409	0.0876742	25.6395	0.0790588	0.932094	0.0516327	>0.05
O55081	RBL2_RAT	Retinoblastoma-like protein 2 (130 kDa retinoblastoma-associated protein) (p130) (PPAR-alpha-interacting complex protein 128) (PRIC128) (Retinoblastoma-related protein 2) (RBR-2) (pRb2)	Rbl2	1135	2	20.7266	0.0736686	20.7101	0.0890995	0.988605	0.0661566	>0.05
O55096	DPP3_RAT	Dipeptidyl peptidase 3 (EC 3.4.14.4) (Dipeptidyl aminopeptidase III) (Dipeptidyl arylamidase III) (Dipeptidyl peptidase III) (DPP III) (Enkephalinase B)	Dpp3	738	7	24.899	0.179948	24.6333	0.0658997	0.831805	0.0397853	>0.05	7	24.8321	0.217862	24.8799	0.180759	1.03369	0.155668	>0.05
O55173	PDPK1_RAT	3-phosphoinositide-dependent protein kinase 1 (EC 2.7.11.1) (Protein kinase B kinase) (PkB kinase)	Pdpk1 Pdk1	559	3	22.4089	0.0617986	22.3857	0.059455	0.984053	0.0414601	>0.05	3	21.051	0.130528	21.2002	0.111054	1.10891	0.0816145	>0.05
O55207	SYNJ2_RAT	Synaptojanin-2 (EC 3.1.3.36) (Synaptic inositol 1,4,5-trisphosphate 5-phosphatase 2)	Synj2	1496									2	20.9037	0.0661166	20.946	0.0635457	1.0297	0.0453576	>0.05
O55212	O55212_RAT	Ribosomal protein S2	0	267									6	23.7769	0.0505323	23.7345	0.0457864	0.971071	0.0299517	>0.05
O70196	PPCE_RAT	Prolyl endopeptidase (PE) (EC 3.4.21.26) (Post-proline cleaving enzyme) (rPop)	Prep	710	3	22.1516	0.235456	22.4193	0.149233	1.20392	0.104325	>0.05	4	20.4443	0.313547	20.7672	0.237303	1.25086	0.203705	>0.05
O70257	STX7_RAT	Syntaxin-7	Stx7	261	4	23.3434	0.0355222	23.3753	0.0396854	1.02237	0.0282088	>0.05	4	22.8533	0.031867	22.8963	0.0457832	1.03031	0.0322017	>0.05
O70277	TRIM3_RAT	Tripartite motif-containing protein 3 (Brain-expressed RING finger protein) (RING finger protein 22)	Trim3 Berp Rnf22	744									4	21.861	0.125819	22.0568	0.154374	1.14533	0.124248	>0.05
O70351	HCD2_RAT	3-hydroxyacyl-CoA dehydrogenase type-2 (EC 1.1.1.35) (17-beta-hydroxysteroid dehydrogenase 10) (17-beta-HSD 10) (EC 1.1.1.51) (3-hydroxy-2-methylbutyryl-CoA dehydrogenase) (EC 1.1.1.178) (3-hydroxyacyl-CoA dehydrogenase type II) (Endoplasmic reticulum-associated amyloid beta-peptide-binding protein) (Mitochondrial ribonuclease P protein 2) (Mitochondrial RNase P protein 2) (Type II HADH)	Hsd17b10 Erab Hadh2	261	9	25.8835	0.0435035	25.9077	0.032044	1.01691	0.0226033	>0.05	8	24.834	0.0410651	24.8714	0.0259387	1.02631	0.018586	>0.05
O70441	SYN3_RAT	Synapsin-3 (Synapsin III)	Syn3	579	8	23.995	0.0929934	24.0049	0.0516806	1.00691	0.0379434	>0.05	8	23.3976	0.0552975	23.413	0.0269924	1.01071	0.0196268	>0.05
O70511	ANK3_RAT	Ankyrin-3 (ANK-3) (Ankyrin-G)	Ank3	2622									22	24.258	0.0235918	24.2142	0.0314551	0.970128	0.0213738	>0.05
O70593	SGTA_RAT	Small glutamine-rich tetratricopeptide repeat-containing protein alpha (Alpha-SGT) (Small glutamine-rich protein with tetratricopeptide repeats 1)	Sgta Sgt Sgt1 Stg	314	4	22.2748	0.0516601	22.2788	0.0519482	1.00273	0.0380225	>0.05	4	21.68	0.122563	21.6277	0.0889333	0.964415	0.060668	>0.05
O88277	FAT2_RAT	Protocadherin Fat 2 (Multiple epidermal growth factor-like domains protein 1) (Multiple EGF-like domains protein 1)	Fat2 Fath2 Megf1	4351	2	23.9121	0.112576	24.0978	0.0784484	1.13736	0.0587878	>0.05	2	22.7839	0.17482	22.8654	0.175412	1.0581	0.136167	>0.05
O88321	O88321_RAT	Antisecretory factor (Proteasome (Prosome, macropain) 26S subunit, non-ATPase, 4, isoform CRA_a) (Protein Psmd4)	Psmd4 rCG_51785	380									3	21.8569	0.108823	21.9807	0.0737964	1.08962	0.0535844	>0.05
O88339	EPN1_RAT	Epsin-1 (EPS-15-interacting protein 1)	Epn1	575	6	25.2038	0.147617	25.1394	0.100981	0.956292	0.0809226	>0.05	7	23.6199	0.0454416	23.6515	0.0320775	1.02208	0.02249	>0.05
O88370	PI42C_RAT	Phosphatidylinositol 5-phosphate 4-kinase type-2 gamma (EC 2.7.1.149) (Phosphatidylinositol 5-phosphate 4-kinase type II gamma) (PI(5)P 4-kinase type II gamma) (PIP4KII-gamma)	Pip4k2c Pip5k2c	420									2	20.4124	0.118148	20.0357	0.0823827	0.770164	0.0435636	<0.05
O88377	PI42B_RAT	Phosphatidylinositol 5-phosphate 4-kinase type-2 beta (EC 2.7.1.149) (1-phosphatidylinositol 5-phosphate 4-kinase 2-beta) (Diphosphoinositide kinase 2-beta) (Phosphatidylinositol 5-phosphate 4-kinase type II beta) (PI(5)P 4-kinase type II beta) (PIP4KII-beta) (Phosphatidylinositol-phosphate kinase IIgamma) (PIPKIIgamma) (PtdIns(5)P-4-kinase isoform 2-beta)	Pip4k2b Pip5k2b	416	5	24.4102	0.0608415	24.536	0.0458936	1.09108	0.0341975	>0.05	5	23.3439	0.0708184	23.5078	0.0604833	1.12038	0.0489229	>0.05
O88382	MAGI2_RAT	Membrane-associated guanylate kinase, WW and PDZ domain-containing protein 2 (Atrophin-1-interacting protein 1) (AIP-1) (Membrane-associated guanylate kinase inverted 2) (MAGI-2) (Synaptic-scaffolding molecule) (S-SCAM)	Magi2 Acvrinp1 Aip1 Sscam	1277									3	23.7108	0.106932	23.4983	0.133462	0.863058	0.0793569	>0.05
O88506	STK39_RAT	STE20/SPS1-related proline-alanine-rich protein kinase (Ste-20-related kinase) (EC 2.7.11.1) (Pancreatic serine/threonine-protein kinase) (PS/TK) (PSTK1) (Serine/threonine-protein kinase 39)	Stk39 Pask Spak	553	2	22.1722	0.0535834	22.2439	0.0773417	1.05091	0.0552323	>0.05
O88588	PACS1_RAT	Phosphofurin acidic cluster sorting protein 1 (PACS-1)	Pacs1	961	6	24.6062	0.0812386	24.5745	0.103838	0.978229	0.0735414	>0.05	9	23.9636	0.0806502	23.9258	0.0409563	0.974097	0.029594	>0.05
O88600	HSP74_RAT	Heat shock 70 kDa protein 4 (Ischemia responsive 94 kDa protein)	Hspa4 Irp94	840	32	28.2312	0.020881	28.6115	0.0365969	1.30156	0.0256821	<0.001	31	27.0762	0.013517	27.1365	0.0135013	1.04264	0.00968233	<0.01
O88637	PCY2_RAT	Ethanolamine-phosphate cytidylyltransferase (EC 2.7.7.14) (CTP:phosphoethanolamine cytidylyltransferase) (Phosphorylethanolamine transferase)	Pcyt2	404	2	20.4526	0.164564	20.431	0.167235	0.985088	0.112529	>0.05
O88761	PSMD1_RAT	26S proteasome non-ATPase regulatory subunit 1 (26S proteasome regulatory subunit RPN2) (26S proteasome regulatory subunit S1) (26S proteasome subunit p112)	Psmd1	953									5	21.68	0.0527882	21.8425	0.0280259	1.11929	0.0210851	<0.05
O88767	PARK7_RAT	Protein DJ-1 (EC 3.4.-.-) (Contraception-associated protein 1) (Protein CAP1) (Fertility protein SP22) (Parkinson disease protein 7 homolog)	Park7 Cap1	189	13	28.3211	0.0536817	28.4378	0.0375867	1.08427	0.0285875	>0.05	12	27.4895	0.122806	27.4793	0.0978885	0.992988	0.0614832	>0.05
O88768	O88768_RAT	ArfGAP with dual PH domains 1 (IP4/PIP3 binding protein) (Protein Adap1)	Adap1 Centa1	374	4	23.6725	0.0210793	23.6993	0.0319611	1.01876	0.0222328	>0.05	4	22.4095	0.0496402	22.359	0.0218541	0.965598	0.0147367	>0.05
O88797	DAB2_RAT	Disabled homolog 2 (Adaptor molecule disabled-2) (C9) (Differentially expressed in ovarian carcinoma 2) (DOC-2) (Mitogen-responsive phosphoprotein)	Dab2 Doc2	768									3	19.9287	0.0904864	19.8784	0.131866	0.965753	0.104219	>0.05
O88831	KKCC2_RAT	Calcium/calmodulin-dependent protein kinase kinase 2 (CaM-KK 2) (CaM-kinase kinase 2) (CaMKK 2) (EC 2.7.11.17) (Calcium/calmodulin-dependent protein kinase kinase beta) (CaM-KK beta) (CaM-kinase kinase beta) (CaMKK beta)	Camkk2	587	4	22.7511	0.0624421	22.6954	0.0835124	0.962176	0.0537043	>0.05	4	21.4026	0.0808014	21.1752	0.110997	0.85418	0.0664873	>0.05
O88943	KCNQ2_RAT	Potassium voltage-gated channel subfamily KQT member 2 (KQT-like 2) (Potassium channel subunit alpha KvLQT2) (Voltage-gated potassium channel subunit Kv7.2)	Kcnq2	852	3	23.8575	0.130522	23.9105	0.108118	1.03739	0.0743241	>0.05
O88989	MDHC_RAT	Malate dehydrogenase, cytoplasmic (EC 1.1.1.37) (Cytosolic malate dehydrogenase)	Mdh1 Mdh	334	13	31.3755	0.031756	31.3625	0.0278398	0.990967	0.0186889	>0.05	14	30.5107	0.0214555	30.5589	0.0151101	1.03403	0.0109046	>0.05
O89035	O89035_RAT	Mitochondrial dicarboxylate carrier (Protein Slc25a10) (Solute carrier family 25 (Mitochondrial carrier dicarboxylate transporter), member 10) (Solute carrier family 25 (Mitochondrial carrier; dicarboxylate transporter), member 10, isoform CRA_b)	Slc25a10 rCG_34251	286	3	22.3234	0.0578593	22.3257	0.0760959	1.00159	0.0611366	>0.05	4	20.6969	0.0621955	20.703	0.0852391	1.00427	0.0595884	>0.05
O89049	TRXR1_RAT	Thioredoxin reductase 1, cytoplasmic (TR) (EC 1.8.1.9) (NADPH-dependent thioredoxin reductase) (Thioredoxin reductase TR1)	Txnrd1 Trxr1	499	5	22.0285	0.0739615	21.9175	0.0734234	0.925912	0.0469171	>0.05
P00173	CYB5_RAT	Cytochrome b5	Cyb5a Cyb5	134	2	21.0133	0.101377	20.8693	0.0706435	0.904995	0.0443809	>0.05
P00388	NCPR_RAT	NADPH--cytochrome P450 reductase (CPR) (P450R) (EC 1.6.2.4)	Por	678	6	24.3027	0.0609799	24.2406	0.0471323	0.957847	0.0317351	>0.05	4	21.3909	0.0930147	21.4467	0.0840146	1.03943	0.0618666	>0.05
P00507	AATM_RAT	Aspartate aminotransferase, mitochondrial (mAspAT) (EC 2.6.1.1) (EC 2.6.1.7) (Fatty acid-binding protein) (FABP-1) (Glutamate oxaloacetate transaminase 2) (Kynurenine aminotransferase 4) (Kynurenine aminotransferase IV) (Kynurenine--oxoglutarate transaminase 4) (Kynurenine--oxoglutarate transaminase IV) (Plasma membrane-associated fatty acid-binding protein) (FABPpm) (Transaminase A)	Got2 Maat	430	26	30.6584	0.0201402	30.9901	0.0193034	1.25843	0.0130537	<0.001	23	29.5918	0.0232895	29.6448	0.0187768	1.0374	0.0133029	>0.05
P00762	TRY1_RAT	Anionic trypsin-1 (EC 3.4.21.4) (Anionic trypsin I) (Pretrypsinogen I) (Serine protease 1)	Prss1 Try1	246									2	24.8854	0.0737635	24.8548	0.0689017	0.979058	0.0470417	>0.05
P00787	CATB_RAT	Cathepsin B (EC 3.4.22.1) (Cathepsin B1) (RSG-2) [Cleaved into: Cathepsin B light chain; Cathepsin B heavy chain]	Ctsb	339									7	22.8415	0.0645166	22.778	0.0951966	0.956962	0.0658139	>0.05
P01026	CO3_RAT	Complement C3 [Cleaved into: Complement C3 beta chain; C3-beta-c (C3bc) (Neutrophil chemotactic factor-2) (ENCF-2); Complement C3 alpha chain; C3a anaphylatoxin (Neutrophil chemotactic factor-1) (ENCF-1); Acylation stimulating protein (ASP) (C3adesArg); Complement C3b alpha' chain; Complement C3c alpha' chain fragment 1; Complement C3dg fragment; Complement C3g fragment; Complement C3d fragment; …	C3	1663	4	25.2789	0.0696217	25.3233	0.0770083	1.03121	0.0553235	>0.05
P01041	CYTB_RAT	Cystatin-B (Cystatin-beta) (Liver thiol proteinase inhibitor) (Stefin-B)	Cstb Cst6	98	3	25.6469	0.0877349	25.7489	0.108431	1.07322	0.0827534	>0.05	3	22.6152	0.0644896	22.6518	0.0371562	1.02574	0.0260764	>0.05
P01830	THY1_RAT	Thy-1 membrane glycoprotein (Thy-1 antigen) (CD antigen CD90)	Thy1 Thy-1	161	4	29.5359	0.118476	29.4292	0.120959	0.92866	0.0921156	>0.05	4	28.5635	0.119035	28.4832	0.103382	0.945867	0.0676241	>0.05
P01946	HBA_RAT	Hemoglobin subunit alpha-1/2 (Alpha-1/2-globin) (Hemoglobin alpha-1/2 chain)	Hba1 Hba-a1	142	11	33.1676	0.121937	33.6116	0.0806795	1.36036	0.0390096	<0.001	11	32.0353	0.088856	31.5567	0.101819	0.717707	0.0274161	<0.001
P02091	HBB1_RAT	Hemoglobin subunit beta-1 (Beta-1-globin) (Hemoglobin beta chain, major-form) (Hemoglobin beta-1 chain)	Hbb	147	17	33.0884	0.125906	33.8054	0.0640496	1.64375	0.0349539	<0.001	17	31.9959	0.0846824	31.4817	0.109452	0.700155	0.0298831	<0.001
P02401	RLA2_RAT	60S acidic ribosomal protein P2	Rplp2 Rp2	115	5	26.839	0.0571142	26.8248	0.0625927	0.990215	0.0447785	>0.05
P02625	PRVA_RAT	Parvalbumin alpha	Pvalb Pva	110	2	20.1396	0.517362	20.1757	0.35032	1.02536	0.219512	>0.05	3	18.6197	0.530107	17.5683	0.531647	0.482509	0.304973	>0.05
P02650	APOE_RAT	Apolipoprotein E (Apo-E)	Apoe	312	7	27.233	0.0377389	27.2182	0.0397115	0.989784	0.0269459	>0.05
P02680	FIBG_RAT	Fibrinogen gamma chain	Fgg	445									2	19.0463	0.213531	19.0911	0.123941	1.03149	0.0818664	>0.05
P02688	MBP_RAT	Myelin basic protein (MBP)	Mbp	195	15	34.0624	0.0718815	33.593	0.0864302	0.722262	0.0437495	<0.001	21	33.2914	0.114842	32.7621	0.0522926	0.692902	0.0348021	<0.001
P02770	ALBU_RAT	Serum albumin	Alb	608	29	30.2358	0.145597	29.9848	0.0650549	0.840334	0.0364727	>0.05	27	28.8004	0.106437	28.3102	0.102145	0.711921	0.049721	<0.001
P03994	HPLN1_RAT	Hyaluronan and proteoglycan link protein 1 (Cartilage-linking protein 1) (Cartilage-link protein) (Proteoglycan link protein)	Hapln1 Crtl1	354	9	27.3555	0.152824	27.1909	0.0886695	0.892145	0.0527319	>0.05	6	23.4067	0.0778501	23.3711	0.0730126	0.975611	0.0495478	>0.05
P04041	GPX1_RAT	Glutathione peroxidase 1 (GPx-1) (GSHPx-1) (EC 1.11.1.9) (Cellular glutathione peroxidase)	Gpx1	201	3	22.2648	0.209123	22.3036	0.17276	1.02728	0.113357	>0.05	2	20.1999	0.136487	20.5277	0.127641	1.25512	0.131547	>0.05
P04094	PENK_RAT	Proenkephalin-A [Cleaved into: Synenkephalin; Met-enkephalin (Opioid growth factor) (OGF); PENK(114-133); PENK(143-185); Met-enkephalin-Arg-Gly-Leu; Leu-enkephalin; PENK(239-260); Met-enkephalin-Arg-Phe]	Penk Penk-rs Penk1	269	5	25.6174	0.182454	26.0904	0.218943	1.38805	0.240629	>0.05	6	24.4898	0.151156	24.8665	0.148462	1.29836	0.0463626	<0.05
P04177	TY3H_RAT	Tyrosine 3-monooxygenase (EC 1.14.16.2) (Tyrosine 3-hydroxylase) (TH)	Th	498	14	27.2566	0.19795	27.8451	0.168904	1.50362	0.0491544	<0.001	15	25.6451	0.181926	26.015	0.112103	1.29226	0.101433	>0.05
P04182	OAT_RAT	Ornithine aminotransferase, mitochondrial (EC 2.6.1.13) (Ornithine--oxo-acid aminotransferase)	Oat	439	9	24.1105	0.143329	24.0549	0.0578437	0.962175	0.0384484	>0.05	6	23.697	0.0260391	23.6437	0.0390624	0.963768	0.02609	>0.05
P04218	OX2G_RAT	OX-2 membrane glycoprotein (MRC OX-2 antigen) (CD antigen CD200)	Cd200 Mox2	278	6	24.8884	0.0491417	25.0091	0.0683747	1.08728	0.0529305	>0.05	4	23.5318	0.0633966	23.5017	0.0907846	0.979382	0.0623903	>0.05
P04631	S100B_RAT	Protein S100-B (S-100 protein beta chain) (S-100 protein subunit beta) (S100 calcium-binding protein B)	S100b	92	4	29.3354	0.0440704	29.3833	0.0502124	1.03375	0.0371972	>0.05	4	28.285	0.0323148	28.2699	0.036458	0.989638	0.0254187	>0.05
P04636	MDHM_RAT	Malate dehydrogenase, mitochondrial (EC 1.1.1.37)	Mdh2 Mor1	338	19	32.1573	0.0193123	32.1631	0.0168905	1.00401	0.0117162	>0.05	19	31.038	0.0217705	31.0754	0.0233284	1.02628	0.0163845	>0.05
P04639	APOA1_RAT	Apolipoprotein A-I (Apo-AI) (ApoA-I) (Apolipoprotein A1) [Cleaved into: Proapolipoprotein A-I (ProapoA-I)]	Apoa1	259	2	22.1787	0.150302	21.8963	0.0917166	0.822258	0.0525669	>0.05	2	19.4604	0.149133	19.547	0.120829	1.06185	0.0971769	>0.05
P04642	LDHA_RAT	L-lactate dehydrogenase A chain (LDH-A) (EC 1.1.1.27) (LDH muscle subunit) (LDH-M)	Ldha Ldh-1 Ldh1	332	20	30.7942	0.0344012	31.2143	0.0282593	1.33803	0.0195777	<0.001	22	29.835	0.020756	29.8448	0.0301963	1.00685	0.0206742	>0.05
P04644	RS17_RAT	40S ribosomal protein S17	Rps17	135	2	21.7791	0.0578073	21.6939	0.0871194	0.942627	0.0569102	>0.05
P04692	TPM1_RAT	Tropomyosin alpha-1 chain (Alpha-tropomyosin) (Tropomyosin-1)	Tpm1 Alpha-tm Tpma	284	12	27.4485	0.0355445	27.4146	0.017191	0.976797	0.0116316	>0.05	16	26.4902	0.0679313	26.4472	0.0318113	0.970666	0.0217402	>0.05
P04762	CATA_RAT	Catalase (EC 1.11.1.6)	Cat Cas1	527	3	23.0322	0.137334	23.0208	0.0779021	0.992144	0.0466367	>0.05	4	21.3712	0.055745	21.4048	0.083391	1.02355	0.0580012	>0.05
P04764	ENOA_RAT	Alpha-enolase (EC 4.2.1.11) (2-phospho-D-glycerate hydro-lyase) (Enolase 1) (Non-neural enolase) (NNE)	Eno1 Eno-1	434	29	32.2429	0.0242623	32.2771	0.0421595	1.02402	0.0299292	>0.05	28	31.4111	0.0204653	31.4523	0.0185128	1.02893	0.0133356	>0.05
P04775	SCN2A_RAT	Sodium channel protein type 2 subunit alpha (Sodium channel protein brain II subunit alpha) (Sodium channel protein type II subunit alpha) (Voltage-gated sodium channel subunit alpha Nav1.2)	Scn2a Scn2a1	2005	4	25.4997	0.205472	25.2618	0.37432	0.848002	0.211267	>0.05	5	25.8212	0.466091	25.8341	0.446982	1.00902	0.309371	>0.05
P04785	PDIA1_RAT	Protein disulfide-isomerase (PDI) (EC 5.3.4.1) (Cellular thyroid hormone-binding protein) (Prolyl 4-hydroxylase subunit beta)	P4hb Pdia1	509	9	24.9411	0.0521189	24.9985	0.0381884	1.0406	0.0273768	>0.05	6	23.1681	0.0367116	23.0849	0.0343616	0.943959	0.0224776	>0.05
P04797	G3P_RAT	Glyceraldehyde-3-phosphate dehydrogenase (GAPDH) (EC 1.2.1.12) (38 kDa BFA-dependent ADP-ribosylation substrate) (BARS-38) (Peptidyl-cysteine S-nitrosylase GAPDH) (EC 2.6.99.-)	Gapdh Gapd	333	25	33.4254	0.0158067	33.8478	0.0321589	1.34016	0.0218307	<0.001	28	32.3348	0.0171011	32.3641	0.0171599	1.02048	0.0121533	>0.05
P04897	GNAI2_RAT	Guanine nucleotide-binding protein G(i) subunit alpha-2 (Adenylate cyclase-inhibiting G alpha protein)	Gnai2 Gnai-2	355	15	28.1201	0.0720807	28.097	0.0590087	0.984084	0.0404052	>0.05	15	26.7876	0.0350136	26.7692	0.0383224	0.987358	0.026036	>0.05
P04904	GSTA3_RAT	Glutathione S-transferase alpha-3 (EC 2.5.1.18) (GST 2-2) (GST A3-3) (GST AA) (Glutathione S-transferase Yc-1) (GST Yc1)	Gsta3 Gstyc1	221	6	24.7272	0.109888	24.6647	0.105375	0.957602	0.0678466	>0.05	6	22.8675	0.110395	22.883	0.117889	1.01084	0.0818928	>0.05
P04905	GSTM1_RAT	Glutathione S-transferase Mu 1 (EC 2.5.1.18) (GST 3-3) (GSTM1-1) (Glutathione S-transferase Yb-1) (GST Yb1)	Gstm1	218	12	28.1825	0.0593395	28.3103	0.0693477	1.0926	0.0517567	>0.05	11	27.4359	0.0613927	27.4608	0.0447807	1.01745	0.0318995	>0.05
P04906	GSTP1_RAT	Glutathione S-transferase P (EC 2.5.1.18) (Chain 7) (GST 7-7) (GST class-pi)	Gstp1	210	9	28.4602	0.0647656	28.4935	0.0965035	1.02334	0.0686074	>0.05	8	27.1243	0.100597	26.6652	0.0603765	0.727452	0.0321324	<0.001
P05065	ALDOA_RAT	Fructose-bisphosphate aldolase A (EC 4.1.2.13) (Muscle-type aldolase)	Aldoa	364	26	32.2841	0.0348616	32.67	0.0352877	1.30668	0.0241793	<0.001	29	31.1935	0.0186749	31.1679	0.0179892	0.982467	0.0122658	>0.05
P05197	EF2_RAT	Elongation factor 2 (EF-2)	Eef2	858	28	27.544	0.0252875	27.5882	0.0347023	1.03111	0.0251989	>0.05	29	26.2651	0.0303899	26.2487	0.0338713	0.988688	0.0229706	>0.05
P05370	G6PD_RAT	Glucose-6-phosphate 1-dehydrogenase (G6PD) (EC 1.1.1.49)	G6pdx G6pd	515	4	23.5037	0.0737715	23.5099	0.0402439	1.00426	0.0269175	>0.05
P05371	CLUS_RAT	Clusterin (Dimeric acid glycoprotein) (DAG) (Sulfated glycoprotein 2) (SGP-2) (Testosterone repressed prostate message 2) (TRPM-2) [Cleaved into: Clusterin beta chain; Clusterin alpha chain]	Clu	447									5	23.6988	0.077387	23.7508	0.047709	1.0367	0.0347216	>0.05
P05426	RL7_RAT	60S ribosomal protein L7	Rpl7	260									6	22.0849	0.0580047	22.0587	0.0346818	0.981997	0.0239071	>0.05
P05708	HXK1_RAT	Hexokinase-1 (EC 2.7.1.1) (Brain form hexokinase) (Hexokinase type I) (HK I)	Hk1	918	40	30.6579	0.0434667	30.6801	0.0297828	1.01549	0.0207906	>0.05	40	29.5048	0.0318848	29.4903	0.0295068	0.989999	0.020214	>0.05
P05712	RAB2A_RAT	Ras-related protein Rab-2A	Rab2a Rab2	212	8	27.6045	0.0927555	27.6138	0.0939041	1.00649	0.0662008	>0.05	7	25.7958	0.0310241	25.8453	0.0395413	1.0349	0.0288031	>0.05
P06302	PTMA_RAT	Prothymosin alpha [Cleaved into: Prothymosin alpha, N-terminally processed; Thymosin alpha]	Ptma	112	4	23.9656	0.172123	23.3778	0.264317	0.665373	0.100447	>0.05	4	22.4438	0.321944	22.0682	0.33967	0.770747	0.22896	>0.05
P06399	FIBA_RAT	Fibrinogen alpha chain [Cleaved into: Fibrinopeptide A; Fibrinogen alpha chain]	Fga	782									5	20.0001	0.158551	20.0003	0.0632609	1.00013	0.0436537	>0.05
P06685	AT1A1_RAT	Sodium/potassium-transporting ATPase subunit alpha-1 (Na(+)/K(+) ATPase alpha-1 subunit) (EC 3.6.3.9) (Sodium pump subunit alpha-1)	Atp1a1	1023	39	32.664	0.0315607	32.054	0.0101142	0.655197	0.00674525	<0.001	39	31.6317	0.0282728	31.6047	0.0292216	0.981453	0.0199042	>0.05
P06686	AT1A2_RAT	Sodium/potassium-transporting ATPase subunit alpha-2 (Na(+)/K(+) ATPase alpha-2 subunit) (EC 3.6.3.9) (Na(+)/K(+) ATPase alpha(+) subunit) (Sodium pump subunit alpha-2)	Atp1a2	1020	48	32.7308	0.0332598	32.6941	0.0221124	0.974854	0.0154361	>0.05	46	31.6459	0.0262485	31.6366	0.0296467	0.993579	0.0202797	>0.05
P06687	AT1A3_RAT	Sodium/potassium-transporting ATPase subunit alpha-3 (Na(+)/K(+) ATPase alpha-3 subunit) (EC 3.6.3.9) (Na(+)/K(+) ATPase alpha(III) subunit) (Sodium pump subunit alpha-3)	Atp1a3	1013	52	33.3759	0.0246782	33.3538	0.0290058	0.984762	0.0209517	>0.05	53	32.2694	0.023479	32.2653	0.0270996	0.997161	0.0184467	>0.05
P06761	GRP78_RAT	78 kDa glucose-regulated protein (GRP-78) (Heat shock 70 kDa protein 5) (Immunoglobulin heavy chain-binding protein) (BiP) (Steroidogenesis-activator polypeptide)	Hspa5 Grp78	654	25	29.876	0.0210039	29.8953	0.0181244	1.01348	0.013016	>0.05	26	28.7263	0.0186461	28.7644	0.0219826	1.02677	0.0158343	>0.05
P07153	RPN1_RAT	Dolichyl-diphosphooligosaccharide--protein glycosyltransferase subunit 1 (EC 2.4.99.18) (Dolichyl-diphosphooligosaccharide--protein glycosyltransferase 67 kDa subunit) (Ribophorin I) (RPN-I) (Ribophorin-1)	Rpn1	605	6	23.2296	0.126786	23.0428	0.0972075	0.878558	0.0719649	>0.05	4	21.6426	0.0295742	21.6243	0.0361533	0.987378	0.0253039	>0.05
P07171	CALB1_RAT	Calbindin (Calbindin D28) (D-28K) (Spot 35 protein) (Vitamin D-dependent calcium-binding protein, avian-type)	Calb1	261	15	27.1348	0.118328	27.5812	0.113176	1.36259	0.0424983	<0.001	14	26.0488	0.0519018	26.2703	0.072346	1.16588	0.0572611	<0.05
P07323	ENOG_RAT	Gamma-enolase (EC 4.2.1.11) (2-phospho-D-glycerate hydro-lyase) (Enolase 2) (Neural enolase) (Neuron-specific enolase) (NSE)	Eno2 Eno-2	434	29	32.1762	0.052544	32.313	0.0417752	1.09952	0.0310109	>0.05	29	31.4221	0.0456857	31.4807	0.0312414	1.04147	0.0226708	>0.05
P07335	KCRB_RAT	Creatine kinase B-type (EC 2.7.3.2) (B-CK) (Creatine kinase B chain)	Ckb Ckbb	381	27	33.4358	0.0392955	33.446	0.0440275	1.0071	0.0291294	>0.05	29	32.5463	0.0290107	32.5943	0.0385971	1.03385	0.0274477	>0.05
P07340	AT1B1_RAT	Sodium/potassium-transporting ATPase subunit beta-1 (Sodium/potassium-dependent ATPase subunit beta-1)	Atp1b1	304	16	31.5677	0.0293167	31.5413	0.0219032	0.981845	0.0147433	>0.05	15	30.2196	0.0258959	30.2206	0.0155852	1.00066	0.0106971	>0.05
P07483	FABPH_RAT	Fatty acid-binding protein, heart (Fatty acid-binding protein 3) (Heart-type fatty acid-binding protein) (H-FABP)	Fabp3	133	5	25.3345	0.0903865	24.9755	0.0747494	0.779694	0.0413543	<0.05	5	24.9199	0.0836476	24.8137	0.0758548	0.929039	0.0496036	>0.05
P07722	MAG_RAT	Myelin-associated glycoprotein (Brain neuron cytoplasmic protein 3) (Sialic acid-binding Ig-like lectin 4a) (Siglec-4a)	Mag	626	12	27.534	0.073662	27.4877	0.125392	0.968394	0.0971492	>0.05	10	26.6679	0.13755	26.6253	0.0942285	0.970898	0.0624092	>0.05
P07825	SYPH_RAT	Synaptophysin (Major synaptic vesicle protein p38)	Syp	307	4	29.3736	0.0513824	29.3405	0.0550947	0.977335	0.0375291	>0.05	6	28.5763	0.0570895	28.5202	0.0606973	0.961864	0.044072	>0.05
P07895	SODM_RAT	Superoxide dismutase [Mn], mitochondrial (EC 1.15.1.1)	Sod2	222	3	25.419	0.0619835	25.9409	0.0502463	1.43586	0.0271703	<0.001	4	23.9733	0.118647	23.9842	0.106942	1.0076	0.0750667	>0.05
P07936	NEUM_RAT	Neuromodulin (Axonal membrane protein GAP-43) (Growth-associated protein 43) (Protein F1)	Gap43	226	10	29.9989	0.119622	30.5733	0.066991	1.48906	0.0310111	<0.001	9	29.2821	0.0522349	29.3084	0.0461971	1.01838	0.0329164	>0.05
P07943	ALDR_RAT	Aldose reductase (AR) (EC 1.1.1.21) (Aldehyde reductase)	Akr1b1 Akr1b4 Aldr1	316	12	27.0281	0.0857821	27.0975	0.0465678	1.04932	0.0334047	>0.05	11	25.8546	0.0377959	25.8685	0.0424254	1.0097	0.0300762	>0.05
P08009	GSTM4_RAT	Glutathione S-transferase Yb-3 (EC 2.5.1.18) (Chain 4) (GST Yb3) (GST class-mu 3)	Gstm3	218	12	28.2925	0.0581597	28.3554	0.0715461	1.04456	0.0509803	>0.05	13	27.4833	0.0691878	27.5194	0.0462003	1.02534	0.0337169	>0.05
P08050	CXA1_RAT	Gap junction alpha-1 protein (Connexin-43) (Cx43) (Gap junction 43 kDa heart protein)	Gja1 Cxn-43	382	8	26.3854	0.09562	26.2357	0.144582	0.901475	0.105755	>0.05	8	25.3671	0.0954652	25.2704	0.106707	0.935169	0.0790965	>0.05
P08081	CLCA_RAT	Clathrin light chain A (Lca)	Clta	248	6	26.195	0.0898749	25.9909	0.245892	0.8681	0.0963107	>0.05	6	25.0257	0.151405	24.7504	0.135419	0.826256	0.0695971	>0.05
P08082	CLCB_RAT	Clathrin light chain B (Lcb)	Cltb	229	6	26.7532	0.0790693	26.6984	0.071403	0.962706	0.0459178	>0.05	7	25.7384	0.0343976	25.6463	0.0319304	0.938135	0.0211912	>0.05
P08413	KCC2B_RAT	Calcium/calmodulin-dependent protein kinase type II subunit beta (CaM kinase II subunit beta) (CaMK-II subunit beta) (EC 2.7.11.17)	Camk2b	542	22	31.1258	0.054609	31.0776	0.0454716	0.9671	0.0319795	>0.05	23	30.0115	0.0380426	30.0406	0.0372204	1.02035	0.0251155	>0.05
P08461	ODP2_RAT	Dihydrolipoyllysine-residue acetyltransferase component of pyruvate dehydrogenase complex, mitochondrial (EC 2.3.1.12) (70 kDa mitochondrial autoantigen of primary biliary cirrhosis) (PBC) (Dihydrolipoamide acetyltransferase component of pyruvate dehydrogenase complex) (Pyruvate dehydrogenase complex component E2) (PDC-E2) (PDCE2)	Dlat	632	19	29.0122	0.0332124	29.0216	0.0315754	1.00654	0.0218341	>0.05	16	28.237	0.0557338	28.2311	0.0390832	0.995903	0.0282731	>0.05
P08592	A4_RAT	Amyloid beta A4 protein (ABPP) (APP) (Alzheimer disease amyloid A4 protein homolog) (Amyloidogenic glycoprotein) (AG) [Cleaved into: N-APP; Soluble APP-alpha (S-APP-alpha); Soluble APP-beta (S-APP-beta); C99; Beta-amyloid protein 42 (Beta-APP42); Beta-amyloid protein 40 (Beta-APP40); C83; P3(42); P3(40); C80; Gamma-secretase C-terminal fragment 59 (Gamma-CTF(59)); Gamma-secretase C-terminal fragm…	App	770	3	23.3812	0.320155	23.1206	0.225156	0.834713	0.137409	>0.05	3	23.1654	0.0377449	23.2077	0.0664866	1.02982	0.0470096	>0.05
P08644	RASK_RAT	GTPase KRas (K-Ras 2) (Ki-Ras) (c-K-ras) (c-Ki-ras) [Cleaved into: GTPase KRas, N-terminally processed]	Kras Kras2	189	6	25.8489	0.126973	25.9042	0.123602	1.03908	0.0962984	>0.05
P08753	GNAI3_RAT	Guanine nucleotide-binding protein G(k) subunit alpha (G(i) alpha-3)	Gnai3 Gnai-3	354	6	27.367	0.0978284	26.9902	0.0808319	0.770114	0.0427485	<0.001	6	26.0303	0.0389456	25.975	0.054898	0.962431	0.0360737	>0.05
P08932	KNT2_RAT	T-kininogen 2 (Alpha-1-MAP) (Major acute phase protein) (T-kininogen II) (Thiostatin) [Cleaved into: T-kininogen 2 heavy chain (T-kininogen II heavy chain); T-kinin; T-kininogen 2 light chain (T-kininogen II light chain)]	0	430									4	25.2658	0.221692	25.2899	0.205771	1.01681	0.144302	>0.05
P09117	ALDOC_RAT	Fructose-bisphosphate aldolase C (EC 4.1.2.13) (Brain-type aldolase)	Aldoc	363	24	30.5393	0.0614476	30.6189	0.0510154	1.05676	0.0362542	>0.05	24	29.7116	0.0182338	29.7341	0.023222	1.01572	0.0163863	>0.05
P09215	KPCD_RAT	Protein kinase C delta type (EC 2.7.11.13) (nPKC-delta) [Cleaved into: Protein kinase C delta type regulatory subunit; Protein kinase C delta type catalytic subunit (Sphingosine-dependent protein kinase-1) (SDK1)]	Prkcd Pkcd	673	4	23.0066	0.116331	23.0602	0.155082	1.03782	0.0978495	>0.05	5	26.1936	0.119084	26.2316	0.11262	1.0267	0.0803624	>0.05
P09456	KAP0_RAT	cAMP-dependent protein kinase type I-alpha regulatory subunit [Cleaved into: cAMP-dependent protein kinase type I-alpha regulatory subunit, N-terminally processed]	Prkar1a	381	4	23.1443	0.0632253	23.1985	0.0446541	1.03824	0.0323857	>0.05
P09495	TPM4_RAT	Tropomyosin alpha-4 chain (Tropomyosin-4) (TM-4)	Tpm4	248	8	26.571	0.0401073	26.5901	0.0179539	1.01337	0.0125343	>0.05	9	25.5712	0.0853289	25.5251	0.0644574	0.968574	0.0457947	>0.05
P09527	RAB7A_RAT	Ras-related protein Rab-7a (Ras-related protein BRL-RAS) (Ras-related protein p23)	Rab7a Rab7	207	12	26.2576	0.0694933	26.2477	0.0555036	0.99317	0.0397847	>0.05	13	25.2303	0.0533666	25.1652	0.0252282	0.955908	0.0168286	>0.05
P09606	GLNA_RAT	Glutamine synthetase (GS) (EC 6.3.1.2) (Glutamate decarboxylase) (EC 4.1.1.15) (Glutamate--ammonia ligase)	Glul Glns	373	14	28.9501	0.0851537	28.8391	0.110221	0.925924	0.0775588	>0.05	15	28.4944	0.125835	28.495	0.0422504	1.00046	0.0295116	>0.05
P09895	RL5_RAT	60S ribosomal protein L5	Rpl5	297	3	22.9361	0.0442739	22.8667	0.0897	0.953044	0.0601768	>0.05	4	22.4712	0.0675844	22.4393	0.0722742	0.978139	0.0498462	>0.05
P09951	SYN1_RAT	Synapsin-1 (Synapsin I)	Syn1	704	33	31.9613	0.0260662	31.9049	0.0312471	0.961647	0.0209049	>0.05	33	30.8439	0.0280502	30.8568	0.0345718	1.00898	0.0252371	>0.05
P0C0A9	SVIP_RAT	Small VCP/p97-interacting protein	Svip	76	2	22.6971	0.141552	22.5653	0.0789225	0.912656	0.0489742	>0.05	2	21.3281	0.139445	21.1824	0.128823	0.903955	0.0781888	>0.05
P0C0S7	H2AZ_RAT	Histone H2A.Z (H2A/z)	H2afz H2az	128	5	29.4892	0.122077	29.437	0.0810262	0.964445	0.0567036	>0.05	5	28.6124	0.0465903	28.5842	0.0363004	0.980679	0.0236903	>0.05
P0C2C4	RM10_RAT	39S ribosomal protein L10, mitochondrial (L10mt) (MRP-L10) (MRP-L8)	Mrpl10	263									2	19.1314	0.103175	19.3498	0.119424	1.1635	0.101575	>0.05
P0C5W1	MAP1S_RAT	Microtubule-associated protein 1S (MAP-1S) [Cleaved into: MAP1S heavy chain; MAP1S light chain]	Map1s	972	2	16.4334	2.04594	19.1081	0.464463	6.38504	1.42236	>0.05
P0C5X8	TTYH1_RAT	Protein tweety homolog 1	Ttyh1	450	5	25.5364	0.0660359	25.5646	0.0968739	1.01973	0.0711685	>0.05	5	24.0615	0.0701266	24.2117	0.0372775	1.10974	0.0286954	>0.05
P0C643	GRP2_RAT	RAS guanyl-releasing protein 2 (Calcium and DAG-regulated guanine nucleotide exchange factor I) (CalDAG-GEFI)	Rasgrp2	608	4	22.401	0.243945	22.6219	0.164694	1.16542	0.113389	>0.05	4	21.6586	0.215648	21.901	0.112202	1.18296	0.0931139	>0.05
P0C6S7	ANS1B_RAT	Ankyrin repeat and sterile alpha motif domain-containing protein 1B (Amyloid-beta protein intracellular domain-associated protein 1) (AIDA-1) (E2A-PBX1-associated protein) (EB-1)	Anks1b	1260	6	24.8781	0.0480666	24.8833	0.045165	1.00367	0.0323853	>0.05	7	24.3171	0.0524347	24.3016	0.0593312	0.989354	0.0408393	>0.05
P0DJJ3	SGIP1_RAT	SH3-containing GRB2-like protein 3-interacting protein 1 (Endophilin-3-interacting protein)	Sgip1	827									13	24.4255	0.135402	24.4277	0.142209	1.00153	0.100981	>0.05
P10111	PPIA_RAT	Peptidyl-prolyl cis-trans isomerase A (PPIase A) (EC 5.2.1.8) (Cyclophilin A) (Cyclosporin A-binding protein) (Rotamase A) (p1B15) (p31) [Cleaved into: Peptidyl-prolyl cis-trans isomerase A, N-terminally processed]	Ppia	164	14	31.6225	0.0276075	31.6004	0.0193653	0.984783	0.0132128	>0.05	15	30.4397	0.0158967	30.4361	0.0205368	0.997527	0.0142947	>0.05
P10362	SCG2_RAT	Secretogranin-2 (Chromogranin-C) (Secretogranin II) (SgII) [Cleaved into: Secretoneurin (SN)]	Scg2 Chgc Scg-2	619	8	24.5059	0.274259	24.949	0.206025	1.35948	0.236846	>0.05	5	20.8494	0.195956	21.1189	0.150599	1.20535	0.156896	>0.05
P10687	PLCB1_RAT	1-phosphatidylinositol 4,5-bisphosphate phosphodiesterase beta-1 (EC 3.1.4.11) (PLC-154) (Phosphoinositide phospholipase C-beta-1) (Phospholipase C-I) (PLC-I) (Phospholipase C-beta-1) (PLC-beta-1)	Plcb1	1216	36	27.6175	0.0618885	27.6107	0.0694401	0.995269	0.0478439	>0.05	33	26.2072	0.0253661	26.2664	0.0531205	1.04187	0.0383595	>0.05
P10760	SAHH_RAT	Adenosylhomocysteinase (AdoHcyase) (EC 3.3.1.1) (S-adenosyl-L-homocysteine hydrolase)	Ahcy	432	13	26.2396	0.0532915	26.2598	0.0523495	1.01407	0.0381561	>0.05	13	25.0205	0.0686601	25.136	0.0420999	1.08336	0.0314442	>0.05
P10818	CX6A1_RAT	Cytochrome c oxidase subunit 6A1, mitochondrial (Cytochrome c oxidase polypeptide VIa-liver)	Cox6a1 Cox6al	111	5	28.545	0.121711	28.4543	0.119596	0.939085	0.0793629	>0.05	4	26.8502	0.078456	26.8835	0.0594453	1.02335	0.0434116	>0.05
P10824	GNAI1_RAT	Guanine nucleotide-binding protein G(i) subunit alpha-1 (Adenylate cyclase-inhibiting G alpha protein)	Gnai1 Gnai-1	354	12	28.2075	0.0594764	27.8307	0.0476569	0.770114	0.0335185	<0.001	12	26.8562	0.0439026	26.8057	0.0592605	0.965632	0.0393301	>0.05
P10860	DHE3_RAT	Glutamate dehydrogenase 1, mitochondrial (GDH 1) (EC 1.4.1.3) (Memory-related gene 2 protein) (MRG-2)	Glud1 Glud	558	25	29.6051	0.0422208	29.9402	0.0615309	1.26153	0.0504355	<0.001	26	28.6731	0.0355198	28.7142	0.0311879	1.02891	0.0229338	>0.05
P10888	COX41_RAT	Cytochrome c oxidase subunit 4 isoform 1, mitochondrial (Cytochrome c oxidase polypeptide IV) (Cytochrome c oxidase subunit IV isoform 1) (COX IV-1)	Cox4i1 Cox4 Cox4a	169	12	29.4278	0.0610939	29.4191	0.0622903	0.993971	0.0421754	>0.05	11	28.4045	0.0196615	28.4325	0.0389123	1.0196	0.0270058	>0.05
P11167	GTR1_RAT	Solute carrier family 2, facilitated glucose transporter member 1 (Glucose transporter type 1, erythrocyte/brain) (GLUT-1)	Slc2a1 Glut-1 Glut1	492	5	24.604	0.0516182	24.6653	0.0351862	1.04338	0.0259709	>0.05	5	23.9501	0.0809329	23.9835	0.0512515	1.02339	0.0349293	>0.05
P11232	THIO_RAT	Thioredoxin (Trx)	Txn Txn1	105	4	23.4926	0.180411	23.822	0.095164	1.25647	0.0831023	>0.05	3	24.1855	0.230174	24.1551	0.193766	0.979092	0.133012	>0.05
P11240	COX5A_RAT	Cytochrome c oxidase subunit 5A, mitochondrial (Cytochrome c oxidase polypeptide Va)	Cox5a	146	10	30.1221	0.109486	30.1703	0.119688	1.03398	0.0845423	>0.05	11	29.4514	0.0272257	29.4573	0.0316438	1.0041	0.0215201	>0.05
P11275	KCC2A_RAT	Calcium/calmodulin-dependent protein kinase type II subunit alpha (CaM kinase II subunit alpha) (CaMK-II subunit alpha) (EC 2.7.11.17)	Camk2a	478	23	31.4656	0.0717533	31.1186	0.0664901	0.786228	0.0269084	<0.001	25	30.4198	0.0455816	30.3796	0.0217988	0.972543	0.0146638	>0.05
P11348	DHPR_RAT	Dihydropteridine reductase (EC 1.5.1.34) (HDHPR) (Quinoid dihydropteridine reductase)	Qdpr Dhpr	241	15	28.0262	0.0603376	27.5923	0.106276	0.740246	0.0321945	<0.05	15	26.4904	0.111755	26.4515	0.0942737	0.973371	0.060567	>0.05
P11505	AT2B1_RAT	Plasma membrane calcium-transporting ATPase 1 (PMCA1) (EC 3.6.3.8) (Plasma membrane calcium ATPase isoform 1) (Plasma membrane calcium pump isoform 1)	Atp2b1	1258	33	29.9512	0.04123	29.8311	0.0692127	0.920117	0.040099	>0.05
P11506	AT2B2_RAT	Plasma membrane calcium-transporting ATPase 2 (PMCA2) (EC 3.6.3.8) (Plasma membrane calcium ATPase isoform 2) (Plasma membrane calcium pump isoform 2)	Atp2b2	1243	28	29.2913	0.0366526	29.1392	0.0586443	0.899935	0.0357214	<0.05	29	28.1538	0.0608413	28.1198	0.0296652	0.976671	0.0198281	>0.05
P11507	AT2A2_RAT	Sarcoplasmic/endoplasmic reticulum calcium ATPase 2 (SERCA2) (SR Ca(2+)-ATPase 2) (EC 3.6.3.8) (Calcium pump 2) (Calcium-transporting ATPase sarcoplasmic reticulum type, slow twitch skeletal muscle isoform) (Endoplasmic reticulum class 1/2 Ca(2+) ATPase)	Atp2a2	1043	34	28.2299	0.0434511	27.7974	0.0697333	0.740977	0.0345633	<0.001	31	27.1216	0.0311038	26.436	0.0447994	0.621741	0.0309952	<0.01
P11517	HBB2_RAT	Hemoglobin subunit beta-2 (Beta-2-globin) (Hemoglobin beta chain, minor-form) (Hemoglobin beta-2 chain)	0	147	15	32.5709	0.127186	32.9315	0.066734	1.284	0.044888	<0.001	15	31.5287	0.0857645	31.0595	0.101151	0.722343	0.0347612	<0.001
P11598	PDIA3_RAT	Protein disulfide-isomerase A3 (EC 5.3.4.1) (58 kDa glucose-regulated protein) (58 kDa microsomal protein) (p58) (Disulfide isomerase ER-60) (Endoplasmic reticulum resident protein 57) (ER protein 57) (ERp57) (Endoplasmic reticulum resident protein 60) (ER protein 60) (ERp60) (HIP-70) (Q-2)	Pdia3 Erp60 Grp58	505	20	27.6104	0.0366813	27.5793	0.049986	0.978654	0.0341704	>0.05	22	26.8539	0.0400594	26.8767	0.0277649	1.01593	0.0198963	>0.05
P11608	ATP8_RAT	ATP synthase protein 8 (A6L) (Chargerin II) (F-ATPase subunit 8)	Mt-atp8 Atp8 Atpase8 Mtatp8	67	2	25.1253	0.0759208	25.1227	0.0351189	0.998203	0.0249558	>0.05	2	24.058	0.0723269	24.1418	0.0376572	1.05984	0.0274447	>0.05
P11730	KCC2G_RAT	Calcium/calmodulin-dependent protein kinase type II subunit gamma (CaM kinase II subunit gamma) (CaMK-II subunit gamma) (EC 2.7.11.17)	Camk2g	527	15	30.6847	0.0716047	30.0406	0.0622041	0.639912	0.0232782	<0.01	20	29.589	0.0529497	29.1785	0.0468147	0.752401	0.030953	<0.001
P11884	ALDH2_RAT	Aldehyde dehydrogenase, mitochondrial (EC 1.2.1.3) (ALDH class 2) (ALDH-E2) (ALDH1)	Aldh2	519	16	26.6853	0.0790584	26.8696	0.105113	1.13622	0.0719619	>0.05
P11915	NLTP_RAT	Non-specific lipid-transfer protein (NSL-TP) (EC 2.3.1.176) (Propanoyl-CoA C-acyltransferase) (SCP-chi) (SCPX) (Sterol carrier protein 2) (SCP-2) (Sterol carrier protein X) (SCP-X)	Scp2 Scp-2	547	6	23.4961	0.0944867	23.4035	0.0808936	0.937805	0.0545346	>0.05	3	22.1592	0.0721445	22.0167	0.0940653	0.905903	0.0582128	>0.05
P11951	CX6C2_RAT	Cytochrome c oxidase subunit 6C-2 (Cytochrome c oxidase polypeptide VIc-2)	Cox6c2 Cox6c	76	4	27.5586	0.135416	27.676	0.114893	1.08477	0.0877815	>0.05	3	26.1594	0.0222133	26.1594	0.0553419	0.999981	0.0368111	>0.05
P11980	KPYM_RAT	Pyruvate kinase PKM (EC 2.7.1.40) (Pyruvate kinase muscle isozyme)	Pkm Pkm2 Pykm	531	44	32.6982	0.0414194	32.729	0.0389739	1.02156	0.0269051	>0.05	41	31.4323	0.0156306	31.4819	0.0189932	1.03497	0.0136146	>0.05
P12001	RL18_RAT	60S ribosomal protein L18	Rpl18	188	3	24.2374	0.158033	24.1609	0.144835	0.948299	0.117865	>0.05	3	22.6427	0.0635881	22.5987	0.0460085	0.970004	0.0306516	>0.05
P12007	IVD_RAT	Isovaleryl-CoA dehydrogenase, mitochondrial (IVD) (EC 1.3.8.4)	Ivd	424	4	22.5613	0.286106	22.9939	0.103516	1.34972	0.113098	>0.05	4	21.2287	0.0389354	21.0554	0.167568	0.886812	0.0759772	>0.05
P12075	COX5B_RAT	Cytochrome c oxidase subunit 5B, mitochondrial (Cytochrome c oxidase polypeptide Vb) (Cytochrome c oxidase subunit VIA*)	Cox5b	129	8	28.8084	0.0320217	28.7815	0.0198897	0.981557	0.0134677	>0.05	8	27.4164	0.044651	27.4509	0.0540505	1.02418	0.037945	>0.05
P12368	KAP2_RAT	cAMP-dependent protein kinase type II-alpha regulatory subunit	Prkar2a	401	13	26.6569	0.0958619	26.6937	0.0716659	1.02589	0.0508277	>0.05	13	25.2632	0.0598584	25.3849	0.0416637	1.08795	0.0317924	>0.05
P12369	KAP3_RAT	cAMP-dependent protein kinase type II-beta regulatory subunit	Prkar2b	416	18	28.7411	0.0803921	29.1484	0.064033	1.32626	0.0366817	<0.001	14	27.6317	0.0614255	27.8371	0.0517416	1.15305	0.0410086	<0.05
P12785	FAS_RAT	Fatty acid synthase (EC 2.3.1.85) [Includes: [Acyl-carrier-protein] S-acetyltransferase (EC 2.3.1.38); [Acyl-carrier-protein] S-malonyltransferase (EC 2.3.1.39); 3-oxoacyl-[acyl-carrier-protein] synthase (EC 2.3.1.41); 3-oxoacyl-[acyl-carrier-protein] reductase (EC 1.1.1.100); 3-hydroxyacyl-[acyl-carrier-protein] dehydratase (EC 4.2.1.59); Enoyl-[acyl-carrier-protein] reductase (EC 1.3.1.39); Ole…	Fasn	2505	23	25.4865	0.0576289	25.8525	0.0516144	1.28874	0.0354198	<0.001	19	24.6216	0.0448252	24.6389	0.0516549	1.10565	0.0362558	>0.05
P12839	NFM_RAT	Neurofilament medium polypeptide (NF-M) (160 kDa neurofilament protein) (Neurofilament 3) (Neurofilament triplet M protein)	Nefm Nef3 Nfm	846	30	30.1137	0.116674	29.6453	0.115225	0.722786	0.0666551	<0.001	27	29.25	0.126526	29.1786	0.071935	0.951683	0.047075	>0.05
P13084	NPM_RAT	Nucleophosmin (NPM) (Nucleolar phosphoprotein B23) (Nucleolar protein NO38) (Numatrin)	Npm1	292	3	24.1976	0.0993706	24.1608	0.0748466	0.974824	0.0504344	>0.05	3	22.3322	0.0784318	22.4475	0.0614556	1.08316	0.0454551	>0.05
P13086	SUCA_RAT	Succinyl-CoA ligase [ADP/GDP-forming] subunit alpha, mitochondrial (EC 6.2.1.4) (EC 6.2.1.5) (Succinyl-CoA synthetase subunit alpha) (SCS-alpha)	Suclg1	346	7	27.3477	0.0465218	27.4687	0.0385261	1.0875	0.0276977	>0.05	8	26.0965	0.0313332	26.1979	0.0302054	1.07281	0.0233786	<0.05
P13221	AATC_RAT	Aspartate aminotransferase, cytoplasmic (cAspAT) (EC 2.6.1.1) (EC 2.6.1.3) (Cysteine aminotransferase, cytoplasmic) (Cysteine transaminase, cytoplasmic) (cCAT) (Glutamate oxaloacetate transaminase 1) (Transaminase A)	Got1	413	18	28.4526	0.0855647	28.8619	0.0995602	1.32799	0.0566721	<0.001	16	27.1802	0.105222	27.2954	0.0749783	1.08313	0.0551481	>0.05
P13233	CN37_RAT	2',3'-cyclic-nucleotide 3'-phosphodiesterase (CNP) (CNPase) (EC 3.1.4.37)	Cnp Cnp1	420	27	32.9999	0.0697823	32.6774	0.101429	0.799682	0.02805	<0.001	25	31.9457	0.104355	31.8977	0.0580299	0.967287	0.0389378	>0.05
P13234	KCC4_RAT	Calcium/calmodulin-dependent protein kinase type IV (CaMK IV) (EC 2.7.11.17) (CaM kinase-GR) (Calspermin)	Camk4	474	10	24.4544	0.103295	24.3904	0.0412253	0.956601	0.0268314	>0.05	6	23.0308	0.126362	23.0107	0.0888358	0.986139	0.0604784	>0.05
P13264	GLSK_RAT	Glutaminase kidney isoform, mitochondrial (GLS) (EC 3.5.1.2) (K-glutaminase) (L-glutamine amidohydrolase) [Cleaved into: Glutaminase kidney isoform 68 kDa chain; Glutaminase kidney isoform 65 kDa chain]	Gls	674	23	28.2831	0.032184	28.2345	0.0366903	0.96688	0.0238572	>0.05	22	26.7245	0.018355	26.7408	0.0293362	1.01133	0.0201277	>0.05
P13383	NUCL_RAT	Nucleolin (Protein C23)	Ncl Nuc	713	10	24.4719	0.0709161	24.4946	0.0424305	1.01589	0.0290364	>0.05	8	23.9045	0.03136	23.9308	0.0375929	1.01842	0.0271407	>0.05
P13471	RS14_RAT	40S ribosomal protein S14	Rps14	151	2	23.6986	0.112777	23.6398	0.129284	0.96006	0.0904225	>0.05	2	22.8992	0.0999678	22.7617	0.0990475	0.909049	0.0597105	>0.05
P13596	NCAM1_RAT	Neural cell adhesion molecule 1 (N-CAM-1) (NCAM-1) (CD antigen CD56)	Ncam1 Ncam	858	28	30.0599	0.0230018	30.0659	0.0428999	1.00414	0.0307861	>0.05	28	28.5811	0.0480544	28.5206	0.0662937	0.958966	0.0454031	>0.05
P13668	STMN1_RAT	Stathmin (Leukemia-associated phosphoprotein p18) (Metablastin) (Oncoprotein 18) (Op18) (Phosphoprotein p19) (pp19) (Pr22 protein) (Prosolin) (pp17)	Stmn1 Lap18	149	4	27.4601	0.171391	27.313	0.160269	0.903016	0.103748	>0.05	6	25.8175	0.0890232	25.4311	0.0980698	0.765018	0.0345068	<0.001
P13803	ETFA_RAT	Electron transfer flavoprotein subunit alpha, mitochondrial (Alpha-ETF)	Etfa	333	11	26.2791	0.384763	25.9334	0.2569	0.786964	0.193517	>0.05	8	23.4279	0.101838	23.3856	0.0479009	0.971099	0.0304274	>0.05
P14046	A1I3_RAT	Alpha-1-inhibitor 3 (Alpha-1-inhibitor 3 variant II) (Alpha-1-inhibitor III)	A1i3 Mug1	1477	19	26.0766	0.192587	25.7648	0.0991748	0.805625	0.0588116	>0.05	13	24.1463	0.0956214	23.6717	0.127574	0.719656	0.0530335	<0.001
P14173	DDC_RAT	Aromatic-L-amino-acid decarboxylase (AADC) (EC 4.1.1.28) (DOPA decarboxylase) (DDC)	Ddc	480	7	24.0495	0.166136	24.0757	0.162083	1.01831	0.118941	>0.05	8	22.0895	0.156409	22.4191	0.0829295	1.2567	0.0788528	>0.05
P14604	ECHM_RAT	Enoyl-CoA hydratase, mitochondrial (EC 4.2.1.17) (Enoyl-CoA hydratase 1) (Short-chain enoyl-CoA hydratase) (SCEH)	Echs1	290	6	25.7116	0.0718753	25.6581	0.0970253	0.963543	0.0668697	>0.05	5	24.6949	0.0603691	24.7039	0.0571939	1.00624	0.0412408	>0.05
P14646	PDE4B_RAT	cAMP-specific 3',5'-cyclic phosphodiesterase 4B (EC 3.1.4.53) (DPDE4)	Pde4b	736									3	23.5637	0.0595685	23.931	0.0639116	1.28995	0.0334016	<0.001
P14668	ANXA5_RAT	Annexin A5 (Anchorin CII) (Annexin V) (Annexin-5) (Calphobindin I) (CBP-I) (Endonexin II) (Lipocortin V) (Placental anticoagulant protein 4) (PP4) (Placental anticoagulant protein I) (PAP-I) (Thromboplastin inhibitor) (Vascular anticoagulant-alpha) (VAC-alpha)	Anxa5 Anx5	319	10	26.6228	0.0696364	26.7988	0.0863391	1.12974	0.0691238	>0.05	9	25.9664	0.0328611	25.949	0.0356795	0.988062	0.0236632	>0.05
P14669	ANXA3_RAT	Annexin A3 (35-alpha calcimedin) (Annexin III) (Annexin-3) (Lipocortin III) (Placental anticoagulant protein III) (PAP-III)	Anxa3 Anx3	324	6	23.5668	0.0664918	23.4344	0.0881589	0.912303	0.0589105	>0.05	4	22.7697	0.0566286	22.7413	0.0606532	0.980491	0.0391786	>0.05
P14841	CYTC_RAT	Cystatin-C (Cystatin-3)	Cst3	140	2	26.4188	0.0942732	26.4737	0.0501088	1.03884	0.0358701	>0.05	2	25.8508	0.0755226	25.8254	0.118269	0.982584	0.0722231	>0.05
P14882	PCCA_RAT	Propionyl-CoA carboxylase alpha chain, mitochondrial (PCCase subunit alpha) (EC 6.4.1.3) (Propanoyl-CoA:carbon dioxide ligase subunit alpha)	Pcca	737	7	23.6955	0.215263	23.758	0.225183	1.04429	0.15915	>0.05	6	21.9305	0.140782	21.8549	0.0491443	0.948979	0.033452	>0.05
P15087	CBPE_RAT	Carboxypeptidase E (CPE) (EC 3.4.17.10) (Carboxypeptidase H) (CPH) (Enkephalin convertase) (Prohormone-processing carboxypeptidase)	Cpe	476	6	21.0637	0.127118	20.8279	0.179989	0.849173	0.137085	>0.05
P15178	SYDC_RAT	Aspartate--tRNA ligase, cytoplasmic (EC 6.1.1.12) (Aspartyl-tRNA synthetase) (AspRS)	Dars Drs1	501									3	20.9112	0.0696279	21.0758	0.0804139	1.12079	0.0629538	>0.05
P15650	ACADL_RAT	Long-chain specific acyl-CoA dehydrogenase, mitochondrial (LCAD) (EC 1.3.8.8)	Acadl	430	4	22.3733	0.16677	22.3318	0.144036	0.971637	0.103356	>0.05	4	20.7319	0.0751353	20.6282	0.0805056	0.930592	0.0541095	>0.05
P15791	KCC2D_RAT	Calcium/calmodulin-dependent protein kinase type II subunit delta (CaM kinase II subunit delta) (CaMK-II subunit delta) (EC 2.7.11.17)	Camk2d	533	13	30.6319	0.063022	30.6055	0.0594113	0.981869	0.0436908	>0.05	12	29.4914	0.0668665	29.5172	0.0637464	1.01802	0.0413451	>0.05
P15865	H14_RAT	Histone H1.4 (H1d)	Hist1h1e H1f4	219	5	28.7643	0.0559449	28.7419	0.0709732	0.984636	0.0468746	>0.05	5	27.7125	0.0840975	27.6091	0.0676464	0.930854	0.0466504	>0.05
P15999	ATPA_RAT	ATP synthase subunit alpha, mitochondrial	Atp5a1	553	27	32.9331	0.0278251	32.9357	0.0327157	1.00186	0.0223884	>0.05	30	31.8739	0.0190002	31.949	0.0326103	1.0534	0.0230857	>0.05
P16086	SPTN1_RAT	Spectrin alpha chain, non-erythrocytic 1 (Alpha-II spectrin) (Fodrin alpha chain)	Sptan1 Spna2 Spta2	2472	154	32.3226	0.0199818	32.2836	0.0217823	0.973335	0.0146117	>0.05	153	31.4561	0.0251362	31.463	0.0178285	1.00478	0.0125763	>0.05
P16446	PIPNA_RAT	Phosphatidylinositol transfer protein alpha isoform (PI-TP-alpha) (PtdIns transfer protein alpha) (PtdInsTP alpha)	Pitpna Pitpn	271	14	26.0551	0.0649827	25.921	0.0526333	0.911236	0.0331063	>0.05	11	24.5403	0.0286428	24.5551	0.0237923	1.01032	0.016386	>0.05
P16617	PGK1_RAT	Phosphoglycerate kinase 1 (EC 2.7.2.3)	Pgk1 Pgk-1	417	34	31.3997	0.0166452	31.4245	0.0202354	1.01736	0.0141917	>0.05	32	30.2489	0.0189025	30.2866	0.0111584	1.02646	0.00788493	>0.05
P16638	ACLY_RAT	ATP-citrate synthase (EC 2.3.3.8) (ATP-citrate (pro-S-)-lyase) (Citrate cleavage enzyme)	Acly	1100	28	26.6706	0.0529831	26.6668	0.0562018	0.997374	0.0395956	>0.05	23	24.8173	0.0605991	24.8449	0.0396824	1.01934	0.0292044	>0.05
P17074	RS19_RAT	40S ribosomal protein S19	Rps19	145									3	20.6129	0.203467	20.5381	0.165521	0.949455	0.106575	>0.05
P17077	RL9_RAT	60S ribosomal protein L9	Rpl9	192	3	22.6292	0.111499	22.7226	0.0727235	1.0669	0.0547732	>0.05
P17105	IP3KA_RAT	Inositol-trisphosphate 3-kinase A (EC 2.7.1.127) (Inositol 1,4,5-trisphosphate 3-kinase A) (IP3 3-kinase A) (IP3K A) (InsP 3-kinase A)	Itpka	459	7	23.8059	0.105994	23.6714	0.0929809	0.910965	0.057808	>0.05	7	22.6362	0.0370866	22.6215	0.0669361	0.989804	0.0494244	>0.05
P17764	THIL_RAT	Acetyl-CoA acetyltransferase, mitochondrial (EC 2.3.1.9) (Acetoacetyl-CoA thiolase)	Acat1	424	14	28.1807	0.0511918	28.2034	0.0368955	1.01587	0.0265957	>0.05	13	27.2401	0.0390255	27.2487	0.0484586	1.00593	0.034375	>0.05
P18088	DCE1_RAT	Glutamate decarboxylase 1 (EC 4.1.1.15) (67 kDa glutamic acid decarboxylase) (GAD-67) (Glutamate decarboxylase 67 kDa isoform)	Gad1 Gad67	593	4	23.9026	0.0487462	24.2364	0.0772793	1.2603	0.0562196	<0.01	4	22.6736	0.0825152	22.8098	0.0940199	1.09903	0.0715702	>0.05
P18163	ACSL1_RAT	Long-chain-fatty-acid--CoA ligase 1 (EC 6.2.1.3) (Long-chain acyl-CoA synthetase 1) (LACS 1) (Long-chain-fatty-acid--CoA ligase, liver isozyme)	Acsl1 Acs1 Acsl2 Facl2	699	3	22.0961	0.258634	22.1027	0.159437	1.00457	0.130161	>0.05
P18265	GSK3A_RAT	Glycogen synthase kinase-3 alpha (GSK-3 alpha) (EC 2.7.11.26) (Factor A) (FA) (Serine/threonine-protein kinase GSK3A) (EC 2.7.11.1)	Gsk3a	483	6	24.7317	0.0359054	24.7721	0.0271561	1.0284	0.0195799	>0.05	6	22.4517	0.0710687	22.5132	0.0369499	1.04361	0.0271553	>0.05
P18266	GSK3B_RAT	Glycogen synthase kinase-3 beta (GSK-3 beta) (EC 2.7.11.26) (Factor A) (FA) (Serine/threonine-protein kinase GSK3B) (EC 2.7.11.1)	Gsk3b	420	5	25.0017	0.0499426	25.0139	0.0514111	1.00851	0.0354874	>0.05	5	22.6836	0.0357597	22.7748	0.0264624	1.06523	0.0201691	>0.05
P18297	SPRE_RAT	Sepiapterin reductase (SPR) (EC 1.1.1.153)	Spr	262	4	23.1673	0.124422	23.3493	0.0875217	1.13442	0.0666121	>0.05	4	19.9205	0.0791799	19.9654	0.0582249	1.03162	0.0428591	>0.05
P18418	CALR_RAT	Calreticulin (CALBP) (CRP55) (Calcium-binding protein 3) (CABP3) (Calregulin) (Endoplasmic reticulum resident protein 60) (ERp60) (HACBP)	Calr	416	14	27.8634	0.0500695	27.8068	0.0411844	0.961516	0.0287775	>0.05	14	26.926	0.0381484	26.9507	0.0431218	1.01729	0.0292699	>0.05
P18421	PSB1_RAT	Proteasome subunit beta type-1 (EC 3.4.25.1) (Macropain subunit C5) (Multicatalytic endopeptidase complex subunit C5) (Proteasome component C5) (Proteasome gamma chain)	Psmb1	240									3	20.8892	0.0717355	20.7762	0.158614	0.924693	0.125672	>0.05
P18437	HMGN2_RAT	Non-histone chromosomal protein HMG-17 (High mobility group nucleosome-binding domain-containing protein 2)	Hmgn2 Hmg-17 Hmg17	90	2	17.9913	0.935995	16.3545	1.96774	0.32156	0.951966	>0.05	2	8.97402	1.9138	7.46513	1.61101	0.351382	5.28909	>0.05
P18484	AP2A2_RAT	AP-2 complex subunit alpha-2 (100 kDa coated vesicle protein C) (Adaptor protein complex AP-2 subunit alpha-2) (Adaptor-related protein complex 2 subunit alpha-2) (Alpha-adaptin C) (Alpha2-adaptin) (Clathrin assembly protein complex 2 alpha-C large chain) (Plasma membrane adaptor HA2/AP2 adaptin alpha C subunit)	Ap2a2 Adtab	938									36	28.1208	0.0430833	28.1141	0.0392161	0.995342	0.0265674	>0.05
P18588	MX1_RAT	Interferon-induced GTP-binding protein Mx1 (Myxoma resistance protein 1) (Myxovirus resistance protein 1)	Mx1	652	2	13.4699	2.46662	15.0991	2.54776	3.09343	8.41237	>0.05
P18666	ML12B_RAT	Myosin regulatory light chain 12B (Myosin RLC-B) (Myosin regulatory light chain 2-B, smooth muscle isoform) (MLC-2) (Myosin regulatory light chain 20 kDa) (MLC20) (Myosin regulatory light chain MRLC2)	Myl12b Mrlc2 Mrlcb Mylc2b	172	6	24.7943	0.103816	24.779	0.0725236	0.989458	0.0502057	>0.05	6	24.1127	0.0385065	24.1531	0.0341857	1.02839	0.0250709	>0.05
P19103	PPR1A_RAT	Protein phosphatase 1 regulatory subunit 1A (Protein phosphatase inhibitor 1) (I-1) (IPP-1)	Ppp1r1a Ipp1	171	7	24.8385	0.108326	24.8275	0.0669053	0.992348	0.0477285	>0.05	7	22.6473	0.1065	22.7178	0.0815699	1.05004	0.0614305	>0.05
P19139	CSK21_RAT	Casein kinase II subunit alpha (CK II alpha) (EC 2.7.11.1)	Csnk2a1	391	11	26.678	0.0952001	26.7772	0.0759948	1.07117	0.0546359	>0.05	10	26.242	0.0357664	26.1173	0.104133	0.917145	0.0576168	>0.05
P19234	NDUV2_RAT	NADH dehydrogenase [ubiquinone] flavoprotein 2, mitochondrial (EC 1.6.5.3) (EC 1.6.99.3) (NADH-ubiquinone oxidoreductase 24 kDa subunit)	Ndufv2	248	8	27.2406	0.0504615	27.5741	0.0223538	1.26002	0.0157355	<0.001	8	26.5517	0.0514503	26.6581	0.035732	1.07652	0.0266921	>0.05
P19490	GRIA1_RAT	Glutamate receptor 1 (GluR-1) (AMPA-selective glutamate receptor 1) (GluR-A) (GluR-K1) (Glutamate receptor ionotropic, AMPA 1) (GluA1)	Gria1 Glur1	907	4	22.8034	0.0822825	22.8862	0.0644196	1.05906	0.042772	>0.05	5	21.9049	0.0860878	22.0752	0.0852491	1.12525	0.0645961	>0.05
P19491	GRIA2_RAT	Glutamate receptor 2 (GluR-2) (AMPA-selective glutamate receptor 2) (GluR-B) (GluR-K2) (Glutamate receptor ionotropic, AMPA 2) (GluA2)	Gria2 Glur2	883	12	24.9691	0.0619939	24.9705	0.0665049	1.00097	0.0458645	>0.05	11	23.9065	0.0444883	23.8623	0.0452013	0.969808	0.0309043	>0.05
P19492	GRIA3_RAT	Glutamate receptor 3 (GluR-3) (AMPA-selective glutamate receptor 3) (GluR-C) (GluR-K3) (Glutamate receptor ionotropic, AMPA 3) (GluA3)	Gria3 Glur3	888	5	23.7221	0.0630126	23.7095	0.0516948	0.991327	0.0353071	>0.05	7	22.4204	0.0766895	22.3058	0.035569	0.923629	0.0232589	>0.05
P19511	AT5F1_RAT	ATP synthase F(0) complex subunit B1, mitochondrial (ATP synthase subunit b) (ATPase subunit b)	Atp5f1 Atp5f	256	13	29.7449	0.0304783	29.7489	0.0358218	1.00277	0.0247697	>0.05	12	28.4567	0.0474546	28.4295	0.0315337	0.981317	0.0211422	>0.05
P19527	NFL_RAT	Neurofilament light polypeptide (NF-L) (68 kDa neurofilament protein) (Neurofilament triplet L protein)	Nefl Nf68 Nfl	542	33	30.5571	0.111086	30.0642	0.111728	0.710573	0.0555502	<0.001	30	29.4633	0.147878	29.3974	0.106802	0.95539	0.073339	>0.05
P19627	GNAZ_RAT	Guanine nucleotide-binding protein G(z) subunit alpha (G(x) alpha chain) (Gz-alpha)	Gnaz	355	9	25.5756	0.0460314	25.575	0.0381235	0.999618	0.0263381	>0.05	8	24.0386	0.0446556	24.1262	0.0275554	1.06265	0.0201124	>0.05
P19643	AOFB_RAT	Amine oxidase [flavin-containing] B (EC 1.4.3.4) (Monoamine oxidase type B) (MAO-B)	Maob	520	7	25.2195	0.124371	25.4352	0.105938	1.16128	0.0777142	>0.05	6	24.0414	0.0555017	23.9755	0.0648124	0.955337	0.0427455	>0.05
P19686	GCYA3_RAT	Guanylate cyclase soluble subunit alpha-3 (GCS-alpha-3) (EC 4.6.1.2) (GCS-alpha-1) (Soluble guanylate cyclase large subunit)	Gucy1a3 Guc1a1 Gucy1a1	690	2	20.7599	0.146422	20.827	0.106871	1.04757	0.0761036	>0.05
P19804	NDKB_RAT	Nucleoside diphosphate kinase B (NDK B) (NDP kinase B) (EC 2.7.4.6) (Histidine protein kinase NDKB) (EC 2.7.13.3) (P18)	Nme2	152	14	29.7909	0.0358326	29.7345	0.0437433	0.961686	0.029795	>0.05	15	28.6066	0.0159664	28.6352	0.0205415	1.02	0.0143507	>0.05
P19944	RLA1_RAT	60S acidic ribosomal protein P1	Rplp1	114	2	25.6897	0.0831529	25.7122	0.0855697	1.01572	0.0587501	>0.05	2	22.6946	0.0660189	22.5169	0.0711248	0.884139	0.0434972	>0.05
P19945	RLA0_RAT	60S acidic ribosomal protein P0 (60S ribosomal protein L10E)	Rplp0 Arbp	317	8	25.7749	0.0725878	25.8088	0.129603	1.02379	0.0894719	>0.05	7	25.0401	0.102296	25.1232	0.0785808	1.05927	0.0545838	>0.05
P20059	HEMO_RAT	Hemopexin	Hpx	460	2	21.1551	0.144163	21.0269	0.153948	0.915032	0.0827528	>0.05	2	20.0476	0.246415	19.8716	0.147074	0.885163	0.0936883	>0.05
P20070	NB5R3_RAT	NADH-cytochrome b5 reductase 3 (B5R) (Cytochrome b5 reductase) (EC 1.6.2.2) (Diaphorase-1) [Cleaved into: NADH-cytochrome b5 reductase 3 membrane-bound form; NADH-cytochrome b5 reductase 3 soluble form]	Cyb5r3 Dia1	301	6	23.4298	0.101574	23.3757	0.092974	0.963229	0.0625923	>0.05	3	22.5453	0.0409335	22.5602	0.059554	1.0104	0.0428352	>0.05
P20156	VGF_RAT	Neurosecretory protein VGF (VGF8a protein) [Cleaved into: VGF(24-63); VGF(180-194); VGF(375-407); Neuroendocrine regulatory peptide-1 (NERP-1); Neuroendocrine regulatory peptide-2 (NERP-2); TLQP-11; TLQP-21; TLQP-30; TLQP-62; HFHH-10; AQEE-30; LQEQ-19]	Vgf	617									4	21.0943	0.06729	21.0278	0.0792553	0.954969	0.0528758	>0.05
P20171	RASH_RAT	GTPase HRas (H-Ras-1) (Transforming protein p21) (c-H-ras) (p21ras) [Cleaved into: GTPase HRas, N-terminally processed]	Hras Hras1	189	8	25.591	0.072118	25.5857	0.0734713	0.996314	0.0519827	>0.05	8	24.3505	0.0323071	24.3368	0.0212941	0.990528	0.0145934	>0.05
P20595	GCYB1_RAT	Guanylate cyclase soluble subunit beta-1 (GCS-beta-1) (EC 4.6.1.2) (Guanylate cyclase soluble subunit beta-3) (GCS-beta-3) (Soluble guanylate cyclase small subunit)	Gucy1b3 Guc1b3 Gucy1b1	619									4	21.7943	0.0743202	21.8249	0.075913	1.02148	0.0545461	>0.05
P20650	PPM1A_RAT	Protein phosphatase 1A (EC 3.1.3.16) (Protein phosphatase 2C isoform alpha) (PP2C-alpha) (Protein phosphatase IA)	Ppm1a Pp2c1 Pppm1a	382	6	23.3012	0.0611741	23.3498	0.0446434	1.03427	0.0329795	>0.05	6	22.6971	0.0288334	22.7319	0.0403916	1.02447	0.0291376	>0.05
P20651	PP2BB_RAT	Serine/threonine-protein phosphatase 2B catalytic subunit beta isoform (EC 3.1.3.16) (CAM-PRP catalytic subunit) (Calmodulin-dependent calcineurin A subunit beta isoform)	Ppp3cb	525	15	29.3091	0.0427402	29.2834	0.0415245	0.982321	0.027183	>0.05	17	28.4895	0.0263302	28.5146	0.0358136	1.01754	0.0244674	>0.05
P20717	PADI2_RAT	Protein-arginine deiminase type-2 (EC 3.5.3.15) (Peptidylarginine deiminase II) (Protein-arginine deiminase type II)	Padi2 Pdi Pdi2	665	3	22.4504	0.0790398	22.4454	0.071155	0.996488	0.0514812	>0.05
P20788	UCRI_RAT	Cytochrome b-c1 complex subunit Rieske, mitochondrial (EC 1.10.2.2) (Complex III subunit 5) (Cytochrome b-c1 complex subunit 5) (Liver regeneration-related protein LRRGT00195) (Rieske iron-sulfur protein) (RISP) (Ubiquinol-cytochrome c reductase iron-sulfur subunit) [Cleaved into: Cytochrome b-c1 complex subunit 11 (Complex III subunit IX) (Ubiquinol-cytochrome c reductase 8 kDa protein)]	Uqcrfs1	274	7	27.8244	0.0640536	27.9284	0.040838	1.07475	0.0296979	>0.05	7	27.1032	0.0483771	27.0914	0.0508722	0.991852	0.0354133	>0.05
P21396	AOFA_RAT	Amine oxidase [flavin-containing] A (EC 1.4.3.4) (Monoamine oxidase type A) (MAO-A)	Maoa	526	8	24.5783	0.103263	24.4675	0.0467877	0.926095	0.0313449	>0.05	8	24.0209	0.0444136	24.0956	0.0571641	1.05316	0.0427111	>0.05
P21531	RL3_RAT	60S ribosomal protein L3 (L4)	Rpl3	403	6	23.4159	0.0901383	23.218	0.078367	0.871874	0.0487717	>0.05	4	22.4714	0.153479	22.3799	0.204578	0.938541	0.134531	>0.05
P21533	RL6_RAT	60S ribosomal protein L6 (Neoplasm-related protein C140)	Rpl6	298	8	24.8147	0.109356	24.6434	0.102303	0.888033	0.0697795	>0.05	9	23.8238	0.052277	23.7551	0.042173	0.953518	0.0271076	>0.05
P21571	ATP5J_RAT	ATP synthase-coupling factor 6, mitochondrial (ATPase subunit F6)	Atp5j	108	11	29.3996	0.068025	29.4472	0.0365427	1.03356	0.0262699	>0.05	9	28.0755	0.0556262	28.1262	0.0273139	1.03576	0.019585	>0.05
P21575	DYN1_RAT	Dynamin-1 (EC 3.6.5.5) (B-dynamin) (D100) (Dynamin, brain)	Dnm1 Dnm	864	45	31.0559	0.0334262	30.9949	0.0198598	0.958598	0.0133167	>0.05	46	29.7007	0.0427723	29.6089	0.0217231	0.938365	0.0141988	>0.05
P21707	SYT1_RAT	Synaptotagmin-1 (Synaptotagmin I) (SytI) (p65)	Syt1	421	24	30.5755	0.0248931	30.5437	0.0447537	0.978182	0.0283848	>0.05	23	29.0909	0.0293762	29.0406	0.0269354	0.965729	0.0182002	>0.05
P21708	MK03_RAT	Mitogen-activated protein kinase 3 (MAP kinase 3) (MAPK 3) (EC 2.7.11.24) (ERT2) (Extracellular signal-regulated kinase 1) (ERK-1) (Insulin-stimulated MAP2 kinase) (MAP kinase isoform p44) (p44-MAPK) (MNK1) (Microtubule-associated protein 2 kinase) (p44-ERK1)	Mapk3 Erk1 Prkm3	380	10	25.8776	0.0576523	26.0918	0.0517641	1.16002	0.0410968	<0.05	13	24.554	0.0724746	24.558	0.0587347	1.00276	0.0417987	>0.05
P21913	SDHB_RAT	Succinate dehydrogenase [ubiquinone] iron-sulfur subunit, mitochondrial (EC 1.3.5.1) (Iron-sulfur subunit of complex II) (Ip)	Sdhb Sdh1	282	7	25.4061	0.0544183	25.4165	0.0680652	1.00721	0.0506743	>0.05	8	24.4653	0.0690886	24.4568	0.0828164	0.994129	0.0611598	>0.05
P22057	PTGDS_RAT	Prostaglandin-H2 D-isomerase (EC 5.3.99.2) (Glutathione-independent PGD synthase) (Lipocalin-type prostaglandin-D synthase) (Prostaglandin-D2 synthase) (PGD2 synthase) (PGDS) (PGDS2)	Ptgds	189	2	22.6027	0.175451	22.7996	0.118498	1.14626	0.0907338	>0.05
P22062	PIMT_RAT	Protein-L-isoaspartate(D-aspartate) O-methyltransferase (PIMT) (EC 2.1.1.77) (L-isoaspartyl protein carboxyl methyltransferase) (Protein L-isoaspartyl/D-aspartyl methyltransferase) (Protein-beta-aspartate methyltransferase)	Pcmt1	227	11	27.8809	0.0591925	27.9269	0.0682327	1.03243	0.0498194	>0.05	13	26.6238	0.0468911	26.6312	0.0312124	1.00516	0.0220084	>0.05
P22063	CNTN2_RAT	Contactin-2 (Axonal glycoprotein TAG-1) (Axonin-1) (Transient axonal glycoprotein 1) (TAX-1)	Cntn2 Tax1	1040	4	23.648	0.0360831	23.5385	0.0628487	0.926872	0.0410443	>0.05	4	22.0136	0.0881148	22.0315	0.0822411	1.01249	0.0598397	>0.05
P22831	SYNPR_RAT	Synaptoporin	Synpr	265	3	23.2189	0.200943	23.2997	0.245232	1.0576	0.187897	>0.05
P23358	RL12_RAT	60S ribosomal protein L12	Rpl12	165	6	24.4194	0.06268	24.4428	0.0604322	1.01639	0.043862	>0.05	4	23.9392	0.204127	23.6115	0.198748	0.796813	0.119009	>0.05
P23565	AINX_RAT	Alpha-internexin (Alpha-Inx)	Ina Inexa	505	28	31.2682	0.0665065	31.1991	0.113963	0.953211	0.0762364	>0.05	28	30.2342	0.113923	30.1917	0.0619078	0.970982	0.041695	>0.05
P23576	GBRA2_RAT	Gamma-aminobutyric acid receptor subunit alpha-2 (GABA(A) receptor subunit alpha-2)	Gabra2 Gabra-2	451	2	19.5587	0.287204	19.7657	0.126825	1.15427	0.105181	>0.05
P23711	HMOX2_RAT	Heme oxygenase 2 (HO-2) (EC 1.14.99.3)	Hmox2	315	2	22.2128	0.099187	22.2735	0.0768406	1.04297	0.0557678	>0.05	4	21.8269	0.100225	21.9699	0.145355	1.10419	0.123259	>0.05
P23965	ECI1_RAT	Enoyl-CoA delta isomerase 1, mitochondrial (EC 5.3.3.8) (3,2-trans-enoyl-CoA isomerase) (Delta(3),Delta(2)-enoyl-CoA isomerase) (D3,D2-enoyl-CoA isomerase) (Dodecenoyl-CoA isomerase)	Eci1 Dci	289	2	22.5766	0.12001	22.5896	0.111045	1.009	0.0757178	>0.05	2	20.9206	0.0442881	20.8001	0.0689584	0.919902	0.0427687	>0.05
P23977	SC6A3_RAT	Sodium-dependent dopamine transporter (DA transporter) (DAT) (Solute carrier family 6 member 3)	Slc6a3	619	5	23.3846	0.254433	24.1259	0.22119	1.67168	0.074193	<0.001	5	22.6704	0.202404	22.9684	0.126095	1.22941	0.0977542	>0.05
P23978	SC6A1_RAT	Sodium- and chloride-dependent GABA transporter 1 (GAT-1) (Solute carrier family 6 member 1)	Slc6a1 Gabt1 Gat-1 Gat1	599	6	25.8287	0.105229	25.8397	0.111965	1.00766	0.0891334	>0.05	5	24.63	0.088039	24.4402	0.0653399	0.87674	0.0397571	>0.05
P24049	RL17_RAT	60S ribosomal protein L17 (Amino acid starvation-induced protein) (ASI) (L23)	Rpl17	184	2	23.9987	0.0455668	23.9888	0.0664401	0.993145	0.0461452	>0.05	2	21.953	0.0862849	21.9781	0.0585861	1.01752	0.0393286	>0.05
P24054	SPRL1_RAT	SPARC-like protein 1 (Matrix glycoprotein Sc1)	Sparcl1 Sc1	634	5	20.8468	0.182758	20.6518	0.224393	0.87362	0.166291	>0.05
P24090	FETUA_RAT	Alpha-2-HS-glycoprotein (59 kDa bone sialic acid-containing protein) (BSP) (Fetuin-A) (Glycoprotein PP63)	Ahsg Fetua	352	5	25.0045	0.15021	24.6939	0.0614544	0.806268	0.0347819	>0.05
P24155	THOP1_RAT	Thimet oligopeptidase (EC 3.4.24.15) (Endo-oligopeptidase A) (Endopeptidase 24.15) (PZ-peptidase) (Soluble metallo-endopeptidase)	Thop1	687	11	24.4143	0.105282	24.3705	0.0682914	0.970056	0.0454966	>0.05	10	23.1492	0.0553705	23.1688	0.0454472	1.01367	0.0328098	>0.05
P24329	THTR_RAT	Thiosulfate sulfurtransferase (EC 2.8.1.1) (Rhodanese)	Tst	297	7	26.023	0.0818254	25.966	0.0568251	0.96122	0.03817	>0.05	6	24.7365	0.0289506	24.7891	0.0265995	1.03716	0.0190515	>0.05
P24368	PPIB_RAT	Peptidyl-prolyl cis-trans isomerase B (PPIase B) (EC 5.2.1.8) (CYP-S1) (Cyclophilin B) (Rotamase B) (S-cyclophilin) (SCYLP)	Ppib	216	4	22.9824	0.189155	22.8353	0.128301	0.903071	0.0970871	>0.05	7	23.0219	0.132166	23.1118	0.165873	1.06431	0.130733	>0.05
P24473	GSTK1_RAT	Glutathione S-transferase kappa 1 (EC 2.5.1.18) (GST 13-13) (GST class-kappa) (GSTK1-1) (rGSTK1) (Glutathione S-transferase subunit 13)	Gstk1	226	3	22.0033	0.24451	21.9851	0.134036	0.987414	0.0947125	>0.05
P24942	EAA1_RAT	Excitatory amino acid transporter 1 (Glial glutamate transporter) (Sodium-dependent glutamate/aspartate transporter 1) (GLAST-1) (Solute carrier family 1 member 3)	Slc1a3 Eaat1	543									9	27.7849	0.0715497	27.8758	0.056782	1.06505	0.0403064	>0.05
P25093	FAAA_RAT	Fumarylacetoacetase (FAA) (EC 3.7.1.2) (Beta-diketonase) (Fumarylacetoacetate hydrolase)	Fah	419	4	21.0722	0.227944	20.9072	0.34384	0.891927	0.292918	>0.05	5	21.011	0.227951	20.7197	0.174481	0.817149	0.107594	>0.05
P25113	PGAM1_RAT	Phosphoglycerate mutase 1 (EC 3.1.3.13) (EC 5.4.2.11) (EC 5.4.2.4) (BPG-dependent PGAM 1) (Phosphoglycerate mutase isozyme B) (PGAM-B)	Pgam1	254	16	30.7942	0.0159401	30.7841	0.0170705	0.993042	0.0120793	>0.05	20	29.7457	0.0203523	29.8142	0.0157644	1.04866	0.011432	<0.05
P25235	RPN2_RAT	Dolichyl-diphosphooligosaccharide--protein glycosyltransferase subunit 2 (EC 2.4.99.18) (Dolichyl-diphosphooligosaccharide--protein glycosyltransferase 63 kDa subunit) (Ribophorin II) (RPN-II) (Ribophorin-2)	Rpn2	631	6	23.4656	0.0406371	23.5717	0.0545011	1.07629	0.0394819	>0.05	4	22.1142	0.0357731	22.1547	0.0562503	1.02849	0.0404884	>0.05
P25304	AGRIN_RAT	Agrin [Cleaved into: Agrin N-terminal 110 kDa subunit; Agrin C-terminal 110 kDa subunit; Agrin C-terminal 90 kDa fragment (C90); Agrin C-terminal 22 kDa fragment (C22)]	Agrn Agrin	1959	2	28.5415	0.153803	28.3694	0.152898	0.887566	0.0998262	>0.05	3	25.7418	0.174971	25.9059	0.14342	1.12045	0.112877	>0.05
P26284	ODPA_RAT	Pyruvate dehydrogenase E1 component subunit alpha, somatic form, mitochondrial (EC 1.2.4.1) (PDHE1-A type I)	Pdha1	390									19	28.1903	0.0431916	28.2093	0.0240648	1.01326	0.0170725	>0.05
P26453	BASI_RAT	Basigin (Glycoprotein CE9) (OX-47 antigen) (CD antigen CD147)	Bsg	388	7	25.8329	0.0763001	25.6618	0.115158	0.888197	0.0727968	>0.05	7	24.8348	0.0860218	24.6628	0.0555037	0.887648	0.0340735	>0.05
P26772	CH10_RAT	10 kDa heat shock protein, mitochondrial (Hsp10) (10 kDa chaperonin) (Chaperonin 10) (CPN10)	Hspe1	102	7	29.1041	0.0429726	29.1085	0.0401441	1.00303	0.0273123	>0.05	6	27.7843	0.0727893	27.7643	0.0543911	0.986273	0.0364204	>0.05
P27139	CAH2_RAT	Carbonic anhydrase 2 (EC 4.2.1.1) (Carbonate dehydratase II) (Carbonic anhydrase II) (CA-II)	Ca2	260	10	27.9141	0.0823513	27.7699	0.0950128	0.904906	0.071693	>0.05	9	26.3715	0.100061	26.0268	0.10522	0.787476	0.0480506	<0.01
P27605	HPRT_RAT	Hypoxanthine-guanine phosphoribosyltransferase (HGPRT) (HGPRTase) (EC 2.4.2.8)	Hprt1 Hprt	218	9	25.9935	0.0683636	26.0059	0.0433122	1.00865	0.0311786	>0.05	8	24.6349	0.0311323	24.5924	0.0276193	0.970953	0.0187549	>0.05
P27653	C1TC_RAT	C-1-tetrahydrofolate synthase, cytoplasmic (C1-THF synthase) [Cleaved into: C-1-tetrahydrofolate synthase, cytoplasmic, N-terminally processed] [Includes: Methylenetetrahydrofolate dehydrogenase (EC 1.5.1.5); Methenyltetrahydrofolate cyclohydrolase (EC 3.5.4.9); Formyltetrahydrofolate synthetase (EC 6.3.4.3)]	Mthfd1 Mthfd	935	8	22.2851	0.253007	22.1851	0.155604	0.93307	0.132851	>0.05	9	22.6257	0.079212	22.5932	0.0509034	0.977691	0.0348458	>0.05
P27682	7B2_RAT	Neuroendocrine protein 7B2 (Secretogranin V) (Secretogranin-5) (Secretory granule endocrine protein I) [Cleaved into: N-terminal peptide; C-terminal peptide]	Scg5 Sgne1	210	2	23.1148	0.109576	23.3409	0.120462	1.16966	0.112804	>0.05	2	21.547	0.104808	21.6891	0.0727189	1.10353	0.0548749	>0.05
P27867	DHSO_RAT	Sorbitol dehydrogenase (EC 1.1.1.14) (L-iditol 2-dehydrogenase)	Sord Sdh1	357	2	22.2909	0.217748	21.8807	0.211463	0.752501	0.146667	>0.05	2	20.1466	0.134707	20.169	0.103604	1.01563	0.0743735	>0.05
P28037	AL1L1_RAT	Cytosolic 10-formyltetrahydrofolate dehydrogenase (10-FTHFDH) (FDH) (EC 1.5.1.6) (Aldehyde dehydrogenase family 1 member L1) (FBP-CI)	Aldh1l1 Fthfd	902									4	21.8597	0.194961	21.6612	0.0704075	0.871459	0.0416305	>0.05
P28073	PSB6_RAT	Proteasome subunit beta type-6 (EC 3.4.25.1) (Macropain delta chain) (Multicatalytic endopeptidase complex delta chain) (Proteasome chain 5) (Proteasome delta chain) (Proteasome subunit Y)	Psmb6 Psmb6l	238									4	20.7148	0.159084	20.563	0.112837	0.900138	0.0733214	>0.05
P28480	TCPA_RAT	T-complex protein 1 subunit alpha (TCP-1-alpha) (CCT-alpha)	Tcp1 Cct1 Ccta	556	19	26.6158	0.0701497	26.688	0.0487407	1.05133	0.0362863	>0.05	16	25.4651	0.0486157	25.4419	0.049327	0.98406	0.0338079	>0.05
P29066	ARRB1_RAT	Beta-arrestin-1 (Arrestin beta-1)	Arrb1	418	4	23.1554	0.0970939	23.0214	0.0548867	0.911283	0.0343786	>0.05	3	22.0254	0.107828	21.8537	0.104656	0.887809	0.0688615	>0.05
P29147	BDH_RAT	D-beta-hydroxybutyrate dehydrogenase, mitochondrial (BDH) (EC 1.1.1.30) (3-hydroxybutyrate dehydrogenase)	Bdh1 Bdh	343	6	24.3897	0.0540581	24.363	0.0631945	0.981713	0.0467375	>0.05	8	23.7839	0.0951527	23.7234	0.0857128	0.958948	0.0599857	>0.05
P29266	3HIDH_RAT	3-hydroxyisobutyrate dehydrogenase, mitochondrial (HIBADH) (EC 1.1.1.31)	Hibadh	335	9	24.1802	0.0387919	24.2311	0.0808095	1.03593	0.0599735	>0.05	9	23.1754	0.0530983	23.2241	0.0552334	1.03434	0.0394942	>0.05
P29314	RS9_RAT	40S ribosomal protein S9	Rps9	194	5	23.2326	0.178392	23.1625	0.0920852	0.95257	0.0675775	>0.05	5	22.6543	0.0961486	22.5309	0.0548786	0.918011	0.0358099	>0.05
P29411	KAD3_RAT	GTP:AMP phosphotransferase AK3, mitochondrial (EC 2.7.4.10) (Adenylate kinase 3) (AK 3) (Adenylate kinase 3 alpha-like 1)	Ak3 Ak3l1 Akl3l	227	3	22.6845	0.0574527	22.7801	0.0783305	1.06846	0.0578248	>0.05	4	21.1708	0.0613558	21.0946	0.0725228	0.948551	0.0486575	>0.05
P29419	ATP5I_RAT	ATP synthase subunit e, mitochondrial (ATPase subunit e)	Atp5i	71	3	26.1363	0.110704	26.2906	0.0933593	1.11291	0.0661524	>0.05	2	25.1584	0.146513	25.1751	0.129067	1.01158	0.096338	>0.05
P29994	ITPR1_RAT	Inositol 1,4,5-trisphosphate receptor type 1 (IP3 receptor isoform 1) (IP-3-R) (IP3R 1) (InsP3R1) (Type 1 inositol 1,4,5-trisphosphate receptor) (Type 1 InsP3 receptor)	Itpr1 Insp3r	2750									20	24.7179	0.217678	24.9379	0.236994	1.16475	0.193393	>0.05
P30009	MARCS_RAT	Myristoylated alanine-rich C-kinase substrate (MARCKS) (Protein kinase C substrate 80 kDa protein)	Marcks Macs	309	11	28.8774	0.0841871	29.2505	0.143638	1.29515	0.0409245	<0.01	12	28.0328	0.0737847	27.9866	0.0968675	0.968525	0.0615886	>0.05
P30835	PFKAL_RAT	ATP-dependent 6-phosphofructokinase, liver type (ATP-PFK) (PFK-L) (EC 2.7.1.11) (6-phosphofructokinase type B) (Phosphofructo-1-kinase isozyme B) (PFK-B) (Phosphohexokinase)	Pfkl Pfk-l	780	15	27.0281	0.0770901	26.9854	0.0483276	0.970832	0.0326644	>0.05	14	26.1232	0.0370546	26.1215	0.0379332	0.998801	0.0262294	>0.05
P31000	VIME_RAT	Vimentin	Vim	466	20	27.4622	0.107384	27.6188	0.149239	1.11468	0.121871	>0.05	18	26.823	0.150701	26.9169	0.119412	1.06726	0.0887422	>0.05
P31016	DLG4_RAT	Disks large homolog 4 (Postsynaptic density protein 95) (PSD-95) (Synapse-associated protein 90) (SAP-90) (SAP90)	Dlg4 Dlgh4 Psd95	724	22	27.903	0.031695	27.8507	0.0592413	0.964432	0.0360386	>0.05	21	26.4863	0.0521334	26.4773	0.0406959	0.993776	0.0292196	>0.05
P31044	PEBP1_RAT	Phosphatidylethanolamine-binding protein 1 (PEBP-1) (23 kDa morphine-binding protein) (HCNPpp) (P23K) [Cleaved into: Hippocampal cholinergic neurostimulating peptide (HCNP)]	Pebp1 Pbp Pebp	187	11	30.6355	0.0574069	30.6827	0.0314035	1.03322	0.0229132	>0.05	9	29.6634	0.0331833	29.6342	0.0277505	0.979993	0.0183157	>0.05
P31399	ATP5H_RAT	ATP synthase subunit d, mitochondrial (ATPase subunit d)	Atp5h Atp5jd	161	15	29.7228	0.0325055	29.7349	0.0371906	1.00846	0.0253927	>0.05	13	28.5492	0.0419226	28.5794	0.0319728	1.02121	0.022099	>0.05
P31422	GRM3_RAT	Metabotropic glutamate receptor 3 (mGluR3)	Grm3 Gprc1c Mglur3	879	6	23.5858	0.138202	23.6164	0.117212	1.0214	0.0766866	>0.05	6	21.6328	0.0987438	21.5328	0.0713747	0.932982	0.0440559	>0.05
P31424	GRM5_RAT	Metabotropic glutamate receptor 5 (mGluR5)	Grm5 Gprc1e Mglur5	1203	5	23.0375	0.104922	22.9954	0.0591993	0.971255	0.038141	>0.05	4	20.8057	0.0734318	20.9797	0.108379	1.12819	0.0781455	>0.05
P31596	EAA2_RAT	Excitatory amino acid transporter 2 (GLT-1) (Sodium-dependent glutamate/aspartate transporter 2) (GLUT-R) (Solute carrier family 1 member 2)	Slc1a2 Eaat2 Glt1	573	19	31.4193	0.0190765	31.3469	0.0267995	0.951052	0.0173265	<0.05	18	30.2538	0.0405127	30.2021	0.0201862	0.964824	0.0135006	>0.05
P31647	S6A11_RAT	Sodium- and chloride-dependent GABA transporter 3 (GAT-3) (Solute carrier family 6 member 11)	Slc6a11 Gabt3 Gat-3 Gat-b	627	4	23.5319	0.159445	23.798	0.2498	1.2025	0.362479	>0.05	4	23.2254	0.152881	23.0474	0.111744	0.883944	0.0633418	>0.05
P31662	S6A17_RAT	Sodium-dependent neutral amino acid transporter SLC6A17 (Sodium-dependent neurotransmitter transporter NTT4) (Solute carrier family 6 member 17)	Slc6a17 Ntt4 Rxt1	727	7	24.4494	0.0964348	24.2414	0.0876011	0.865708	0.0533822	>0.05	5	22.7478	0.0362458	22.7648	0.0388194	1.01184	0.0266179	>0.05
P31977	EZRI_RAT	Ezrin (Cytovillin) (Villin-2) (p81)	Ezr Vil2	586	10	24.2761	0.0846584	23.7159	0.0832642	0.678229	0.0473095	<0.001	10	23.6046	0.0745215	23.4036	0.0640265	0.869905	0.0392701	>0.05
P32089	TXTP_RAT	Tricarboxylate transport protein, mitochondrial (Citrate transport protein) (CTP) (Solute carrier family 25 member 1) (Tricarboxylate carrier protein)	Slc25a1 Slc20a3	311	2	21.7095	0.078021	21.7581	0.0741225	1.03423	0.0547283	>0.05	3	21.2575	0.0530132	21.3606	0.0476522	1.07409	0.0358365	>0.05
P32232	CBS_RAT	Cystathionine beta-synthase (EC 4.2.1.22) (Beta-thionase) (Hemoprotein H-450) (Serine sulfhydrase)	Cbs	561	6	23.8865	0.102416	24.1005	0.0717239	1.15986	0.0595972	>0.05
P32551	QCR2_RAT	Cytochrome b-c1 complex subunit 2, mitochondrial (Complex III subunit 2) (Core protein II) (Ubiquinol-cytochrome-c reductase complex core protein 2)	Uqcrc2	452	19	30.3779	0.0300782	30.3828	0.0318335	1.00341	0.0215783	>0.05	19	29.2634	0.0351819	29.3305	0.0365869	1.04764	0.0276417	>0.05
P32736	OPCM_RAT	Opioid-binding protein/cell adhesion molecule (OBCAM) (OPCML) (Opioid-binding cell adhesion molecule)	Opcml Obcam	345	6	26.8859	0.0758335	26.8039	0.102891	0.944746	0.0740537	>0.05	5	25.3038	0.0984948	25.1622	0.0646462	0.906519	0.0400483	>0.05
P32851	STX1A_RAT	Syntaxin-1A (Neuron-specific antigen HPC-1) (Synaptotagmin-associated 35 kDa protein) (P35A)	Stx1a Sap	288	16	29.1575	0.0488295	29.1013	0.0516147	0.961814	0.032693	>0.05
P33124	ACSL6_RAT	Long-chain-fatty-acid--CoA ligase 6 (EC 6.2.1.3) (Long-chain acyl-CoA synthetase 6) (LACS 6) (Long-chain-fatty-acid--CoA ligase, brain isozyme)	Acsl6 Acs2 Facl6	697	22	25.3769	0.0660284	25.3308	0.0535963	0.968537	0.0358248	>0.05	17	23.7727	0.0775991	23.7636	0.0371262	0.993718	0.0250177	>0.05
P34058	HS90B_RAT	Heat shock protein HSP 90-beta (Heat shock 84 kDa) (HSP 84) (HSP84)	Hsp90ab1 Hsp84 Hspcb	724	37	30.5487	0.0292766	30.5564	0.0385191	1.00537	0.0276624	>0.05	38	29.6137	0.0270922	29.6716	0.0202519	1.04096	0.0145549	>0.05
P35171	CX7A2_RAT	Cytochrome c oxidase subunit 7A2, mitochondrial (Cytochrome c oxidase subunit VIIa-liver/heart) (Cytochrome c oxidase subunit VIIa-L)	Cox7a2 Cox7a3 Cox7al	83	3	26.7707	0.0478935	26.7927	0.0622553	1.01536	0.0445212	>0.05	3	25.5661	0.0742718	25.5646	0.0952146	0.998957	0.0657365	>0.05
P35213	1433B_RAT	14-3-3 protein beta/alpha (Prepronerve growth factor RNH-1) (Protein kinase C inhibitor protein 1) (KCIP-1) [Cleaved into: 14-3-3 protein beta/alpha, N-terminally processed]	Ywhab	246	14	31.5742	0.0324407	31.6453	0.0231449	1.0505	0.0172621	>0.05	15	30.621	0.0230142	30.6208	0.0222723	0.999833	0.0157854	>0.05
P35234	PTN5_RAT	Tyrosine-protein phosphatase non-receptor type 5 (EC 3.1.3.48) (Neural-specific protein-tyrosine phosphatase) (Striatum-enriched protein-tyrosine phosphatase) (STEP)	Ptpn5	369	8	25.0929	0.124349	25.6691	0.126282	1.4909	0.0482224	<0.001	8	23.6761	0.125581	24.0375	0.130289	1.28471	0.120043	>0.05
P35332	HPCL4_RAT	Hippocalcin-like protein 4 (Neural visinin-like protein 2) (NVL-2) (NVP-2) (Visinin-like protein 2) (VILIP-2)	Hpcal4	191	9	26.2993	0.0416018	26.3307	0.0666804	1.022	0.0468884	>0.05	8	24.9209	0.0683302	24.7745	0.0777698	0.903506	0.0536489	>0.05
P35439	NMDZ1_RAT	Glutamate receptor ionotropic, NMDA 1 (GluN1) (Glutamate [NMDA] receptor subunit zeta-1) (N-methyl-D-aspartate receptor subunit NR1) (NMD-R1)	Grin1 Nmdar1	938	5	22.9448	0.0636327	22.9642	0.0775572	1.01356	0.0548368	>0.05	3	20.7616	0.101222	20.7239	0.0624712	0.974225	0.0418532	>0.05
P35465	PAK1_RAT	Serine/threonine-protein kinase PAK 1 (EC 2.7.11.1) (Alpha-PAK) (Protein kinase MUK2) (p21-activated kinase 1) (PAK-1) (p68-PAK)	Pak1	544	13	25.673	0.0512052	25.6244	0.0326634	0.966913	0.0218215	>0.05	11	24.3998	0.0625579	24.3273	0.0395527	0.951019	0.0260672	>0.05
P35565	CALX_RAT	Calnexin	Canx	591	17	27.3597	0.133968	27.3055	0.0645571	0.963128	0.0440208	>0.05	16	26.4653	0.0377862	26.4837	0.0326434	1.01281	0.0232516	>0.05
P35571	GPDM_RAT	Glycerol-3-phosphate dehydrogenase, mitochondrial (GPD-M) (GPDH-M) (EC 1.1.5.3)	Gpd2	727	9	24.2276	0.0956345	24.2211	0.0801951	0.995492	0.0582235	>0.05	9	22.7996	0.0411516	22.8063	0.0531004	1.00462	0.0378543	>0.05
P35704	PRDX2_RAT	Peroxiredoxin-2 (EC 1.11.1.15) (Thiol-specific antioxidant protein) (TSA) (Thioredoxin peroxidase 1) (Thioredoxin-dependent peroxide reductase 1)	Prdx2 Tdpx1	198	8	29.4431	0.0929057	29.5874	0.0581554	1.10526	0.0437294	>0.05	8	28.5794	0.0517706	28.6968	0.0294965	1.08481	0.0219302	>0.05
P36201	CRIP2_RAT	Cysteine-rich protein 2 (CRP-2) (Protein ESP1)	Crip2 Crp2	208	4	27.0047	0.115009	27.1321	0.115739	1.09236	0.0823579	>0.05	4	25.8445	0.0850875	25.9473	0.0913815	1.07392	0.0699843	>0.05
P36876	2ABA_RAT	Serine/threonine-protein phosphatase 2A 55 kDa regulatory subunit B alpha isoform (PP2A subunit B isoform B55-alpha) (PP2A subunit B isoform BRA) (PP2A subunit B isoform PR55-alpha) (PP2A subunit B isoform R2-alpha) (PP2A subunit B isoform alpha)	Ppp2r2a	447	4	24.6685	0.110994	24.7649	0.0488347	1.06913	0.03518	>0.05	8	24.5804	0.123264	24.6707	0.0885181	1.0646	0.0627655	>0.05
P36972	APT_RAT	Adenine phosphoribosyltransferase (APRT) (EC 2.4.2.7)	Aprt	180	4	23.5927	0.110585	23.5927	0.0718163	0.999973	0.0490987	>0.05	4	24.4662	0.10554	24.3464	0.112962	0.920298	0.0761638	>0.05
P37136	ACES_RAT	Acetylcholinesterase (AChE) (EC 3.1.1.7)	Ache	614									7	20.6069	0.141337	20.9679	0.0740413	1.28435	0.0548065	<0.05
P37285	KLC1_RAT	Kinesin light chain 1 (KLC 1)	Klc1 Klc Kns2	560	5	23.7409	0.0310868	23.6478	0.0717364	0.937509	0.0464283	>0.05	8	22.5789	0.0484465	22.529	0.0631403	0.965944	0.042619	>0.05
P37377	SYUA_RAT	Alpha-synuclein	Snca	140	8	30.0335	0.0409566	30.0315	0.0661599	0.998637	0.0473012	>0.05	8	29.2308	0.0488673	29.3204	0.050317	1.06407	0.0367161	>0.05
P37397	CNN3_RAT	Calponin-3 (Calponin, acidic isoform) (Calponin, non-muscle isoform)	Cnn3	330	3	22.843	0.117556	22.74	0.12976	0.931123	0.0888555	>0.05	7	21.4644	0.090109	21.3789	0.113985	0.942484	0.0794448	>0.05
P37805	TAGL3_RAT	Transgelin-3 (Neuronal protein 22) (NP22) (Neuronal protein NP25)	Tagln3 Np25	199	12	27.5083	0.0797249	27.1365	0.0411357	0.772826	0.0251701	<0.001	12	26.6502	0.119552	26.5324	0.0922355	0.921629	0.0606739	>0.05
P37996	ARL3_RAT	ADP-ribosylation factor-like protein 3 (ARD3)	Arl3	182	4	22.3086	0.211175	22.5291	0.155857	1.1651	0.151474	>0.05	4	22.6004	0.142347	22.7841	0.173085	1.13581	0.144011	>0.05
P38656	LA_RAT	Lupus La protein homolog (La autoantigen homolog) (La ribonucleoprotein)	Ssb Ss-b	415	2	20.9202	0.179935	20.943	0.160024	1.01591	0.115808	>0.05	3	20.3155	0.123123	20.3622	0.134714	1.03293	0.106938	>0.05
P38718	MPC2_RAT	Mitochondrial pyruvate carrier 2 (Brain protein 44) (Protein 0-44)	Mpc2 Brp44	127	5	24.133	0.303585	24.2768	0.116429	1.1048	0.0839428	>0.05	4	23.9367	0.203071	23.947	0.124048	1.00713	0.0846104	>0.05
P38983	RSSA_RAT	40S ribosomal protein SA (37 kDa laminin receptor precursor) (37LRP) (37/67 kDa laminin receptor) (LRP/LR) (67 kDa laminin receptor) (67LR) (Laminin receptor 1) (LamR) (Laminin-binding protein precursor p40) (LBP/p40)	Rpsa Lamr1	295	8	26.2022	0.051149	26.2053	0.0575438	1.00217	0.0402275	>0.05	7	25.0002	0.104025	24.9328	0.0524999	0.954327	0.0348427	>0.05
P39052	DYN2_RAT	Dynamin-2 (EC 3.6.5.5)	Dnm2 Dyn2	870	15	28.2176	0.0807599	28.1317	0.0567168	0.942208	0.0397931	>0.05
P39069	KAD1_RAT	Adenylate kinase isoenzyme 1 (AK 1) (EC 2.7.4.3) (EC 2.7.4.6) (ATP-AMP transphosphorylase 1) (ATP:AMP phosphotransferase) (Adenylate monophosphate kinase) (Myokinase)	Ak1	194	9	26.2625	0.187778	25.0319	0.18102	0.426147	0.0984544	<0.001	8	25.6572	0.275958	25.5112	0.226637	0.903806	0.200713	>0.05
P40112	PSB3_RAT	Proteasome subunit beta type-3 (EC 3.4.25.1) (Proteasome chain 13) (Proteasome component C10-II) (Proteasome theta chain)	Psmb3	205									3	20.711	0.13005	20.6212	0.137781	0.939692	0.095527	>0.05
P40241	CD9_RAT	CD9 antigen (CD antigen CD9)	Cd9	226	4	26.6275	0.107816	26.5176	0.167452	0.926641	0.134474	>0.05	2	25.2063	0.107714	24.9342	0.118587	0.828068	0.0696776	>0.05
P40307	PSB2_RAT	Proteasome subunit beta type-2 (EC 3.4.25.1) (Macropain subunit C7-I) (Multicatalytic endopeptidase complex subunit C7-I) (Proteasome component C7-I)	Psmb2	201									2	21.196	0.105592	21.4008	0.144525	1.15253	0.1284	>0.05
P40329	SYRC_RAT	Arginine--tRNA ligase, cytoplasmic (EC 6.1.1.19) (Arginyl-tRNA synthetase) (ArgRS)	Rars	660	4	22.3361	0.158097	22.2528	0.199857	0.943902	0.128216	>0.05	3	19.874	0.0539906	19.9706	0.0477975	1.06919	0.0341308	>0.05
P41123	RL13_RAT	60S ribosomal protein L13	Rpl13	211									4	23.0668	0.0830636	22.9625	0.0552853	0.930276	0.0352039	>0.05
P41498	PPAC_RAT	Low molecular weight phosphotyrosine protein phosphatase (LMW-PTP) (LMW-PTPase) (EC 3.1.3.48) (Low molecular weight cytosolic acid phosphatase) (EC 3.1.3.2)	Acp1	158	6	24.9385	0.050838	24.9241	0.0473686	0.99005	0.0322784	>0.05	6	23.2972	0.0420147	23.2836	0.0408603	0.990585	0.0289827	>0.05
P41499	PTN11_RAT	Tyrosine-protein phosphatase non-receptor type 11 (EC 3.1.3.48) (Protein-tyrosine phosphatase 1D) (PTP-1D) (Protein-tyrosine phosphatase SYP) (SH-PTP2) (SHP-2) (Shp2)	Ptpn11	597	7	23.9753	0.0677049	24.0305	0.0459915	1.03898	0.0333464	>0.05	7	21.2973	0.0960016	21.257	0.124559	0.972404	0.090841	>0.05
P41542	USO1_RAT	General vesicular transport factor p115 (Protein USO1 homolog) (Transcytosis-associated protein) (TAP) (Vesicle-docking protein)	Uso1 Vdp	959	8	23.6336	0.0538963	23.2828	0.0585024	0.784133	0.0384882	<0.01	7	22.6656	0.0857959	22.6433	0.0676512	0.984646	0.0478936	>0.05
P41562	IDHC_RAT	Isocitrate dehydrogenase [NADP] cytoplasmic (IDH) (EC 1.1.1.42) (Cytosolic NADP-isocitrate dehydrogenase) (IDP) (NADP(+)-specific ICDH) (Oxalosuccinate decarboxylase)	Idh1	414	7	23.4893	0.0452735	23.5529	0.0430367	1.04506	0.032652	>0.05	9	22.0503	0.0876873	22.0056	0.0630415	0.969511	0.0437808	>0.05
P42123	LDHB_RAT	L-lactate dehydrogenase B chain (LDH-B) (EC 1.1.1.27) (LDH heart subunit) (LDH-H)	Ldhb Ldh-2 Ldh2	334	24	31.3737	0.0330379	31.3829	0.0326159	1.00638	0.0232498	>0.05	23	30.3865	0.020193	30.3895	0.0379513	1.0021	0.0268769	>0.05
P42346	MTOR_RAT	Serine/threonine-protein kinase mTOR (EC 2.7.11.1) (FK506-binding protein 12-rapamycin complex-associated protein 1) (FKBP12-rapamycin complex-associated protein) (Mammalian target of rapamycin) (mTOR) (Mechanistic target of rapamycin) (Rapamycin target protein 1) (RAPT1)	Mtor Frap1 Raft1	2549									3	18.3281	0.164936	18.4123	0.0861054	1.06004	0.0626157	>0.05
P42676	NEUL_RAT	Neurolysin, mitochondrial (EC 3.4.24.16) (Microsomal endopeptidase) (MEP) (Mitochondrial oligopeptidase M) (Neurotensin endopeptidase)	Nln	704									3	20.3732	0.0506836	20.38	0.0829522	1.00472	0.0549121	>0.05
P43138	APEX1_RAT	DNA-(apurinic or apyrimidinic site) lyase (EC 3.1.-.-) (EC 4.2.99.18) (APEX nuclease) (APEN) (Apurinic-apyrimidinic endonuclease 1) (AP endonuclease 1) (REF-1) (Redox factor-1) [Cleaved into: DNA-(apurinic or apyrimidinic site) lyase, mitochondrial]	Apex1 Ape Apex Ref1	317	3	22.5877	0.0589293	22.523	0.038233	0.956201	0.0267281	>0.05	2	21.0758	0.0752441	21.1578	0.0636786	1.05855	0.0459183	>0.05
P43244	MATR3_RAT	Matrin-3 (Nuclear scaffold protein p130/MAT3)	Matr3	845	14	25.9948	0.047358	26.0944	0.0332089	1.07153	0.0254524	>0.05	14	24.9538	0.0686619	24.9713	0.0778991	1.01223	0.0553755	>0.05
P43425	GBG7_RAT	Guanine nucleotide-binding protein G(I)/G(S)/G(O) subunit gamma-7	Gng7 Gngt7	68	6	28.3304	0.180329	28.7964	0.173866	1.38127	0.0447728	<0.001	6	27.0791	0.1327	27.3755	0.0895578	1.22803	0.0774112	>0.05
P45479	PPT1_RAT	Palmitoyl-protein thioesterase 1 (PPT-1) (EC 3.1.2.22) (Palmitoyl-protein hydrolase 1)	Ppt1 Ppt	306	2	22.0826	0.0884491	22.1034	0.0985067	1.01455	0.0682974	>0.05	2	21.4137	0.0837348	21.4346	0.0773529	1.01459	0.0514187	>0.05
P45592	COF1_RAT	Cofilin-1 (Cofilin, non-muscle isoform)	Cfl1	166	12	30.6675	0.0224462	31.1563	0.0206597	1.4033	0.014159	<0.001	12	29.647	0.0407925	29.2063	0.032802	0.73678	0.022595	<0.001
P45953	ACADV_RAT	Very long-chain specific acyl-CoA dehydrogenase, mitochondrial (VLCAD) (EC 1.3.8.9)	Acadvl Vlcad	655	4	24.7787	0.186607	24.9698	0.0436624	1.14161	0.0347089	>0.05	2	23.2049	0.0994253	23.3469	0.126241	1.1034	0.101977	>0.05
P46101	DPP6_RAT	Dipeptidyl aminopeptidase-like protein 6 (DPPX) (Dipeptidyl aminopeptidase-related protein) (Dipeptidyl peptidase 6) (Dipeptidyl peptidase IV-like protein) (Dipeptidyl peptidase VI) (DPP VI)	Dpp6	859	11	24.9726	0.0698103	24.8858	0.051279	0.941594	0.032751	>0.05	13	24.3012	0.105216	24.3677	0.108601	1.04711	0.0768202	>0.05
P46413	GSHB_RAT	Glutathione synthetase (GSH synthetase) (GSH-S) (EC 6.3.2.3) (Glutathione synthase)	Gss	474									2	19.905	0.0984489	20.1043	0.0473754	1.1482	0.0373394	>0.05
P46462	TERA_RAT	Transitional endoplasmic reticulum ATPase (TER ATPase) (EC 3.6.4.6) (15S Mg(2+)-ATPase p97 subunit) (Valosin-containing protein) (VCP)	Vcp	806	29	28.2839	0.0284003	28.3303	0.0401883	1.03265	0.0288683	>0.05	31	27.7104	0.0337148	27.7109	0.0330366	1.00035	0.0231812	>0.05
P46844	BIEA_RAT	Biliverdin reductase A (BVR A) (EC 1.3.1.24) (Biliverdin-IX alpha-reductase)	Blvra Blvr	295	2	21.9546	0.0731108	21.9361	0.112	0.987279	0.0760084	>0.05	3	23.3469	0.11094	23.5548	0.0900668	1.15501	0.0713636	>0.05
P47727	CBR1_RAT	Carbonyl reductase [NADPH] 1 (EC 1.1.1.184) (15-hydroxyprostaglandin dehydrogenase [NADP(+)]) (EC 1.1.1.197) (20-beta-hydroxysteroid dehydrogenase) (NADPH-dependent carbonyl reductase 1) (Prostaglandin 9-ketoreductase) (Prostaglandin-E(2) 9-reductase) (EC 1.1.1.189)	Cbr1 Cbr	277									10	24.9383	0.0697687	24.5898	0.136045	0.785414	0.0400805	<0.001
P47728	CALB2_RAT	Calretinin (CR)	Calb2	271	7	26.0647	0.114668	26.5066	0.0873853	1.35843	0.0410735	<0.001	7	24.8543	0.077258	25.2084	0.0975509	1.2782	0.026785	<0.01
P47819	GFAP_RAT	Glial fibrillary acidic protein (GFAP)	Gfap	430	20	29.0057	0.0672263	28.3986	0.132026	0.656502	0.0252309	<0.001	17	27.8452	0.122746	27.6047	0.0867121	0.84646	0.0526893	>0.05
P47820	ACE_RAT	Angiotensin-converting enzyme (ACE) (EC 3.2.1.-) (EC 3.4.15.1) (Dipeptidyl carboxypeptidase I) (Kininase II) (CD antigen CD143) [Cleaved into: Angiotensin-converting enzyme, soluble form]	Ace Dcp1	1313	5	22.4077	0.336142	21.7064	0.275076	0.615021	0.100286	>0.05	3	20.0406	0.287792	20.073	0.214927	1.02274	0.125033	>0.05
P47860	PFKAP_RAT	ATP-dependent 6-phosphofructokinase, platelet type (ATP-PFK) (PFK-P) (EC 2.7.1.11) (6-phosphofructokinase type C) (Phosphofructo-1-kinase isozyme C) (PFK-C) (Phosphohexokinase)	Pfkp Pfkc	788	31	28.5419	0.0406044	28.4663	0.0458764	0.948927	0.0284575	>0.05	27	27.5962	0.0371395	27.5822	0.0221394	0.990358	0.0153433	>0.05
P47863	AQP4_RAT	Aquaporin-4 (AQP-4) (Mercurial-insensitive water channel) (MIWC) (WCH4)	Aqp4	323	5	27.3176	0.0996863	27.2344	0.06217	0.943957	0.0412675	>0.05	5	25.9762	0.0581254	25.975	0.059438	0.999173	0.0411676	>0.05
P47875	CSRP1_RAT	Cysteine and glycine-rich protein 1 (Cysteine-rich protein 1) (CRP) (CRP1)	Csrp1 Csrp	193	6	26.0543	0.0536288	26.0267	0.0712169	0.981025	0.0538698	>0.05	5	24.9879	0.084196	24.8467	0.0701714	0.906792	0.0470673	>0.05
P47942	DPYL2_RAT	Dihydropyrimidinase-related protein 2 (DRP-2) (Collapsin response mediator protein 2) (CRMP-2) (Turned on after division 64 kDa protein) (TOAD-64)	Dpysl2	572	39	33.2559	0.0132278	33.2651	0.0174758	1.00638	0.0121561	>0.05	39	32.2732	0.0211881	32.2633	0.0200152	0.993125	0.0136808	>0.05
P47971	NPTX1_RAT	Neuronal pentraxin-1 (NP1) (47 kDa taipoxin-binding protein) (Neuronal pentraxin I) (NP-I)	Nptx1	432	4	23.3788	0.122484	23.1673	0.0984176	0.863636	0.0628978	>0.05	3	22.3168	0.14146	22.2492	0.0672895	0.954203	0.0443047	>0.05
P47987	PLLP_RAT	Plasmolipin (Plasma membrane proteolipid)	Pllp Pmlp Tm4sf11	182	2	20.6354	0.249487	20.1754	0.355131	0.726965	0.22649	>0.05
P48004	PSA7_RAT	Proteasome subunit alpha type-7 (EC 3.4.25.1) (Proteasome subunit RC6-1)	Psma7	254	3	20.5884	0.202879	20.2719	0.132795	0.803032	0.0870719	>0.05	4	21.8544	0.0784452	21.8469	0.111067	0.99484	0.0922963	>0.05
P48500	TPIS_RAT	Triosephosphate isomerase (TIM) (EC 5.3.1.1) (Triose-phosphate isomerase)	Tpi1	249	15	31.4838	0.0341509	31.5084	0.0266992	1.01716	0.018925	>0.05	15	30.4404	0.0326331	30.4922	0.0229459	1.03649	0.0164584	>0.05
P48721	GRP75_RAT	Stress-70 protein, mitochondrial (75 kDa glucose-regulated protein) (GRP-75) (Heat shock 70 kDa protein 9) (Mortalin) (Peptide-binding protein 74) (PBP74) (mtHSP70)	Hspa9 Grp75 Hspa9a	679	21	28.4823	0.0391746	28.8236	0.0429057	1.26685	0.0305703	<0.001
P48768	NAC2_RAT	Sodium/calcium exchanger 2 (Na(+)/Ca(2+)-exchange protein 2) (Solute carrier family 8 member 2)	Slc8a2 Ncx2	921	20	27.137	0.0295346	27.1159	0.0334078	0.985469	0.0225601	>0.05	22	26.282	0.0757338	26.2629	0.0496664	0.986803	0.0336039	>0.05
P49187	MK10_RAT	Mitogen-activated protein kinase 10 (MAP kinase 10) (MAPK 10) (EC 2.7.11.24) (SAPK-beta) (Stress-activated protein kinase JNK3) (c-Jun N-terminal kinase 3) (p54-beta)	Mapk10 Jnk3 Prkm10	464	3	22.8163	0.201718	22.7767	0.239777	0.972908	0.188025	>0.05	4	18.7165	0.180161	18.5204	0.139343	0.872898	0.0973497	>0.05
P49242	RS3A_RAT	40S ribosomal protein S3a (V-fos transformation effector protein) [Cleaved into: 40S ribosomal protein S3b]	Rps3a Fte-1 Fte1	264	8	24.6811	0.0569594	24.6072	0.0784651	0.950096	0.0603743	>0.05
P49432	ODPB_RAT	Pyruvate dehydrogenase E1 component subunit beta, mitochondrial (PDHE1-B) (EC 1.2.4.1)	Pdhb	359	17	28.6561	0.0422549	28.6075	0.0385	0.966816	0.0253659	>0.05	16	27.5364	0.0565688	27.5482	0.0504222	1.00822	0.036719	>0.05
P49803	RGS7_RAT	Regulator of G-protein signaling 7 (RGS7)	Rgs7	477	11	26.1919	0.0916711	26.2327	0.0461895	1.02868	0.03299	>0.05	10	23.3891	0.106537	23.3586	0.0690629	0.979097	0.0515655	>0.05
P49911	AN32A_RAT	Acidic leucine-rich nuclear phosphoprotein 32 family member A (Leucine-rich acidic nuclear protein) (LANP)	Anp32a Lanp	247	4	24.5895	0.0689647	24.606	0.0319355	1.01148	0.0228011	>0.05
P50398	GDIA_RAT	Rab GDP dissociation inhibitor alpha (Rab GDI alpha) (Guanosine diphosphate dissociation inhibitor 1) (GDI-1)	Gdi1 Rabgdia	447	41	30.9784	0.0304633	31.0071	0.0202185	1.0201	0.0141966	>0.05	37	29.7993	0.0278126	29.8174	0.0274509	1.0126	0.0196999	>0.05
P50399	GDIB_RAT	Rab GDP dissociation inhibitor beta (Rab GDI beta) (GDI-3) (Guanosine diphosphate dissociation inhibitor 2) (GDI-2)	Gdi2 Gdi3	445	30	29.1098	0.0507846	29.1532	0.0642413	1.03051	0.0472195	>0.05	27	28.2635	0.0152592	28.2746	0.0328086	1.00773	0.0227122	>0.05
P50408	VATF_RAT	V-type proton ATPase subunit F (V-ATPase subunit F) (V-ATPase 14 kDa subunit) (Vacuolar proton pump subunit F)	Atp6v1f Atp6s14 Vatf	119	5	25.419	0.0606412	25.5662	0.0461691	1.10745	0.0370517	>0.05	5	24.4637	0.0478542	24.4619	0.0444343	0.998733	0.0305262	>0.05
P50411	IPP2_RAT	Protein phosphatase inhibitor 2 (IPP-2)	Ppp1r2 Ipp2	205	2	20.4793	0.322555	20.979	0.198455	1.41385	0.0640013	<0.001	2	22.6489	0.0989598	22.9009	0.0543081	1.19091	0.043066	<0.05
P50475	SYAC_RAT	Alanine--tRNA ligase, cytoplasmic (EC 6.1.1.7) (Alanyl-tRNA synthetase) (AlaRS)	Aars	968	13	25.0421	0.0824708	25.0336	0.125767	0.994129	0.0852967	>0.05	11	23.6221	0.085169	23.557	0.056024	0.955866	0.0364293	>0.05
P50503	F10A1_RAT	Hsc70-interacting protein (Hip) (Protein FAM10A1) (Protein ST13 homolog)	St13 Fam10a1 Hip	368	7	25.2809	0.0578366	25.6193	0.03987	1.26434	0.0297387	<0.001	7	24.1435	0.0909872	24.2707	0.113786	1.0922	0.0903599	>0.05
P50554	GABT_RAT	4-aminobutyrate aminotransferase, mitochondrial (EC 2.6.1.19) ((S)-3-amino-2-methylpropionate transaminase) (EC 2.6.1.22) (GABA aminotransferase) (GABA-AT) (Gamma-amino-N-butyrate transaminase) (GABA transaminase) (GABA-T) (L-AIBAT) [Cleaved into: 4-aminobutyrate aminotransferase, brain isoform; 4-aminobutyrate aminotransferase, liver isoform]	Abat Gabat	500	25	30.1333	0.0879226	30.5077	0.0888274	1.29627	0.0304064	<0.001	25	28.9315	0.0447506	29.083	0.043479	1.1107	0.0329015	<0.05
P50878	RL4_RAT	60S ribosomal protein L4 (60S ribosomal protein L1)	Rpl4 Rpl1	421	10	25.4003	0.390011	25.2941	0.368428	0.929053	0.290355	>0.05
P51583	PUR6_RAT	Multifunctional protein ADE2 [Includes: Phosphoribosylaminoimidazole-succinocarboxamide synthase (EC 6.3.2.6) (SAICAR synthetase); Phosphoribosylaminoimidazole carboxylase (EC 4.1.1.21) (AIR carboxylase) (AIRC)]	Paics Ade2 Airc	425	2	20.0185	0.2147	20.0056	0.180967	0.991046	0.120689	>0.05
P51635	AK1A1_RAT	Alcohol dehydrogenase [NADP(+)] (EC 1.1.1.2) (3-DG-reducing enzyme) (Aldehyde reductase) (Aldo-keto reductase family 1 member A1)	Akr1a1 Alr	325	12	26.2524	0.0468438	26.2944	0.0502915	1.02952	0.0357638	>0.05	12	25.1956	0.0325824	25.1553	0.0239894	0.972432	0.0163405	>0.05
P51647	AL1A1_RAT	Retinal dehydrogenase 1 (RALDH 1) (RalDH1) (EC 1.2.1.36) (ALDH-E1) (ALHDII) (Aldehyde dehydrogenase family 1 member A1) (Aldehyde dehydrogenase, cytosolic)	Aldh1a1 Aldh	501	18	26.4708	0.213239	26.3357	0.292817	0.91065	0.168376	>0.05	15	24.9798	0.21746	24.8905	0.221615	0.939949	0.163528	>0.05
P52481	CAP2_RAT	Adenylyl cyclase-associated protein 2 (CAP 2)	Cap2	477	15	26.9258	0.0627469	26.8927	0.0812276	0.977328	0.0535048	>0.05	16	25.4691	0.0380666	25.5015	0.0300653	1.02273	0.0218218	>0.05
P52555	ERP29_RAT	Endoplasmic reticulum resident protein 29 (ERp29) (Endoplasmic reticulum resident protein 31) (ERp31)	Erp29	260	8	24.938	0.0285434	24.9564	0.030764	1.01282	0.0217461	>0.05	6	23.0228	0.0601288	23.1293	0.0677626	1.07667	0.04968	>0.05
P52873	PYC_RAT	Pyruvate carboxylase, mitochondrial (EC 6.4.1.1) (Pyruvic carboxylase) (PCB)	Pc	1178	22	26.058	0.0400369	26.0883	0.025314	1.02117	0.0179222	>0.05	18	24.4885	0.0567145	24.4621	0.0334045	0.981867	0.0228261	>0.05
P53987	MOT1_RAT	Monocarboxylate transporter 1 (MCT 1) (Solute carrier family 16 member 1)	Slc16a1 Mct1	494	2								2	21.0151	0.14472	21.1115	0.0795032	1.06905	0.0634746	>0.05
P54311	GBB1_RAT	Guanine nucleotide-binding protein G(I)/G(S)/G(T) subunit beta-1 (Transducin beta chain 1)	Gnb1	340	14	30.3979	0.0313451	30.3869	0.0449303	0.99238	0.0323635	>0.05	16	29.0026	0.0576693	28.9522	0.0202812	0.965687	0.0132826	>0.05
P54313	GBB2_RAT	Guanine nucleotide-binding protein G(I)/G(S)/G(T) subunit beta-2 (G protein subunit beta-2) (Transducin beta chain 2)	Gnb2	340	13	29.8958	0.0687238	29.483	0.0769561	0.751191	0.046829	<0.001	13	28.4896	0.076454	28.4614	0.0504725	0.980661	0.0345646	>0.05
P54319	PLAP_RAT	Phospholipase A-2-activating protein (PLA2P) (PLAP)	Plaa Plap	795	6	22.3174	0.186256	22.3934	0.140437	1.0541	0.0961902	>0.05	6	21.475	0.0560642	21.599	0.0688216	1.08975	0.052123	>0.05
P54748	PDE4A_RAT	cAMP-specific 3',5'-cyclic phosphodiesterase 4A (EC 3.1.4.53) (DPDE2)	Pde4a	844	2	24.4465	0.0826315	24.453	0.0691965	1.00454	0.0480624	>0.05
P54921	SNAA_RAT	Alpha-soluble NSF attachment protein (SNAP-alpha) (N-ethylmaleimide-sensitive factor attachment protein alpha)	Napa Snap Snapa	295	17	28.0351	0.0424176	28.0316	0.0307418	0.997557	0.0215124	>0.05	16	26.645	0.0701867	26.6969	0.0823838	1.03664	0.0566972	>0.05
P55051	FABP7_RAT	Fatty acid-binding protein, brain (Brain lipid-binding protein) (BLBP) (Brain-type fatty acid-binding protein) (B-FABP) (Fatty acid-binding protein 7)	Fabp7 Blbp	132	3	25.3587	0.13302	25.306	0.1542	0.964122	0.150406	>0.05	4	25.22	0.130957	25.08	0.0931731	0.907529	0.0567768	>0.05
P55053	FABP5_RAT	Fatty acid-binding protein, epidermal (Cutaneous fatty acid-binding protein) (C-FABP) (DA11) (Epidermal-type fatty acid-binding protein) (E-FABP) (Fatty acid-binding protein 5)	Fabp5	135	7	25.8688	0.051634	25.8793	0.0504526	1.00727	0.0367046	>0.05	9	24.9113	0.0371075	24.923	0.045297	1.00819	0.0310653	>0.05
P55260	ANXA4_RAT	Annexin A4 (36 kDa zymogen granule membrane-associated protein) (ZAP36) (Annexin IV) (Annexin-4) (Lipocortin IV)	Anxa4 Anx4	319	4	24.2994	0.093083	24.2332	0.0393755	0.955128	0.0257399	>0.05
P56522	ADRO_RAT	NADPH:adrenodoxin oxidoreductase, mitochondrial (AR) (Adrenodoxin reductase) (EC 1.18.1.6) (Ferredoxin--NADP(+) reductase) (Ferredoxin reductase)	Fdxr	494	2	21.1266	0.0833817	21.1607	0.0771982	1.02385	0.0575996	>0.05
P56558	OGT1_RAT	UDP-N-acetylglucosamine--peptide N-acetylglucosaminyltransferase 110 kDa subunit (EC 2.4.1.255) (O-GlcNAc transferase subunit p110) (O-linked N-acetylglucosamine transferase 110 kDa subunit) (OGT)	Ogt	1036									5	21.3748	0.139371	21.422	0.126738	1.0332	0.0906499	>0.05
P56571	ES1_RAT	ES1 protein homolog, mitochondrial	0	266	7	26.7114	0.113365	26.7517	0.0939247	1.02826	0.0672877	>0.05	7	25.8483	0.0247508	25.8851	0.0258322	1.02587	0.0183039	>0.05
P56574	IDHP_RAT	Isocitrate dehydrogenase [NADP], mitochondrial (IDH) (EC 1.1.1.42) (ICD-M) (IDP) (NADP(+)-specific ICDH) (Oxalosuccinate decarboxylase)	Idh2	452	9	24.6543	0.10922	24.2075	0.0744593	0.733643	0.0243753	<0.001	7	22.8375	0.0643125	22.6819	0.0964944	0.897717	0.0615415	>0.05
P56603	SCAM1_RAT	Secretory carrier-associated membrane protein 1 (Secretory carrier membrane protein 1) (SCAMP 37)	Scamp1 Scamp	338	5	25.4696	0.040518	25.5985	0.0612781	1.09345	0.0447822	>0.05	5	24.5275	0.0492123	24.7055	0.0627785	1.1313	0.0488314	<0.05
P56720	SRBP1_RAT	Sterol regulatory element-binding protein 1 (SREBP-1) (Adipocyte determination- and differentiation-dependent factor 1) (ADD1) (Sterol regulatory element-binding transcription factor 1) [Cleaved into: Processed sterol regulatory element-binding protein 1]	Srebf1 Srebp1	1134	3	26.4802	0.132805	26.2063	0.170031	0.827097	0.0939764	>0.05
P57113	MAAI_RAT	Maleylacetoacetate isomerase (MAAI) (EC 5.2.1.2) (GSTZ1-1) (Glutathione S-transferase zeta 1) (EC 2.5.1.18)	Gstz1	216	4	21.8237	0.0706898	21.9821	0.0824281	1.11605	0.0646152	>0.05	6	21.4056	0.0542276	21.3431	0.0649963	0.957612	0.0412955	>0.05
P58365	CAD23_RAT	Cadherin-23 (Otocadherin)	Cdh23	3317	3	23.1999	0.166877	23.0793	0.0918372	0.919816	0.0584712	>0.05
P59215	GNAO_RAT	Guanine nucleotide-binding protein G(o) subunit alpha	Gnao1 Gna0 Gnao	354	25	31.4654	0.0258096	31.4208	0.0350274	0.969594	0.0242031	>0.05	21	30.1956	0.0281783	30.1702	0.0215943	0.982559	0.0148115	>0.05
P60203	MYPR_RAT	Myelin proteolipid protein (PLP) (Lipophilin)	Plp1 Plp	277	7	33.8361	0.0633065	33.8425	0.100307	1.00443	0.0716892	>0.05	7	32.3947	0.0944271	32.3231	0.0403007	0.95158	0.0252356	>0.05
P60522	GBRL2_RAT	Gamma-aminobutyric acid receptor-associated protein-like 2 (GABA(A) receptor-associated protein-like 2) (Ganglioside expression factor 2) (GEF-2) (Golgi-associated ATPase enhancer of 16 kDa) (GATE-16)	Gabarapl2 Gef2	117									3	22.3396	0.0449013	22.3294	0.0362157	0.992896	0.0254854	>0.05
P60711	ACTB_RAT	Actin, cytoplasmic 1 (Beta-actin) [Cleaved into: Actin, cytoplasmic 1, N-terminally processed]	Actb	375									31	33.2741	0.0152282	33.3225	0.0183178	1.03413	0.0129863	>0.05
P60841	ENSA_RAT	Alpha-endosulfine (ARPP-19e)	Ensa	121	5	26.0595	0.0472452	26.0221	0.0636127	0.974424	0.0431696	>0.05	6	24.9214	0.0910236	24.8889	0.0680961	0.977776	0.0465251	>0.05
P60868	RS20_RAT	40S ribosomal protein S20	Rps20	119									2	22.0981	0.0705885	22.1447	0.0924742	1.03282	0.0707461	>0.05
P60881	SNP25_RAT	Synaptosomal-associated protein 25 (SNAP-25) (Super protein) (SUP) (Synaptosomal-associated 25 kDa protein)	Snap25 Snap	206	11	29.0495	0.0739289	29.0272	0.0300701	0.984653	0.0210561	>0.05	12	27.7373	0.0356238	27.7495	0.0388916	1.00844	0.0259875	>0.05
P60892	PRPS1_RAT	Ribose-phosphate pyrophosphokinase 1 (EC 2.7.6.1) (Phosphoribosyl pyrophosphate synthase I) (PRS-I)	Prps1	318	8	25.6334	0.10016	25.6385	0.0839609	1.00352	0.0583899	>0.05	9	24.3979	0.0886901	24.2198	0.0776912	0.883859	0.0495344	>0.05
P60901	PSA6_RAT	Proteasome subunit alpha type-6 (EC 3.4.25.1) (Macropain iota chain) (Multicatalytic endopeptidase complex iota chain) (Proteasome iota chain)	Psma6	246									2	21.085	0.067212	20.938	0.127452	0.903123	0.105689	>0.05
P60905	DNJC5_RAT	DnaJ homolog subfamily C member 5 (Cysteine string protein) (CSP)	Dnajc5 Csp	198	7	28.1334	0.0416568	28.1243	0.0288602	0.993703	0.0199981	>0.05	7	26.1363	0.0743495	26.2273	0.0597211	1.06512	0.0446731	>0.05
P61023	CHP1_RAT	Calcineurin B homologous protein 1 (Calcineurin B-like protein) (Calcium-binding protein CHP) (Calcium-binding protein p22) (EF-hand calcium-binding domain-containing protein p22)	Chp1 Chp	195	3	22.7654	0.121325	22.3174	0.115202	0.733084	0.0375293	<0.05
P61078	UB2D3_RAT	Ubiquitin-conjugating enzyme E2 D3 (EC 6.3.2.19) (Phosphoarginine phosphatase) (PAPase) (Ubiquitin carrier protein D3) (Ubiquitin-conjugating enzyme E2(17)KB 3) (Ubiquitin-conjugating enzyme E2-17 kDa 3) (Ubiquitin-protein ligase D3)	Ube2d3	147	3	24.9643	0.0726704	24.8935	0.0401262	0.952053	0.0269598	>0.05	2	22.7827	0.0643403	22.7795	0.0615892	0.9978	0.0408397	>0.05
P61107	RAB14_RAT	Ras-related protein Rab-14	Rab14	215	10	27.7297	0.0691144	28.1128	0.0594842	1.30418	0.0404888	<0.001	9	27.0085	0.036371	27.1054	0.026711	1.0695	0.0203732	<0.05
P61203	CSN2_RAT	COP9 signalosome complex subunit 2 (SGN2) (Signalosome subunit 2) (Alien homolog) (JAB1-containing signalosome subunit 2) (Thyroid receptor-interacting protein 15) (TR-interacting protein 15) (TRIP-15)	Cops2 Csn2 Trip15	443	2	22.744	0.145348	22.8355	0.0917585	1.06553	0.0667816	>0.05	5	21.8949	0.0531771	21.9294	0.0600433	1.02416	0.0446846	>0.05
P61206	ARF3_RAT	ADP-ribosylation factor 3 (Liver regeneration-related protein LRRG202)	Arf3 Ac1-253	181	14	29.8349	0.0885275	29.7757	0.0450031	0.95977	0.0315247	>0.05
P61212	ARL1_RAT	ADP-ribosylation factor-like protein 1	Arl1 Arf7	181	2	26.2971	0.216372	26.58	0.0917111	1.21661	0.0854076	>0.05	2	24.309	0.183256	24.2387	0.23022	0.952393	0.165813	>0.05
P61227	RAP2B_RAT	Ras-related protein Rap-2b	Rap2b	183	5	24.5303	0.120107	24.5654	0.0790603	1.02457	0.0588904	>0.05	6	22.927	0.0862429	22.9039	0.0624909	0.984119	0.0430766	>0.05
P61265	STX1B_RAT	Syntaxin-1B (P35B) (Syntaxin-1B2)	Stx1b Stx1b2	288	19	29.8363	0.0349553	29.8349	0.0402929	0.999081	0.0284676	>0.05	18	28.5211	0.0269242	28.5031	0.0269329	0.987639	0.0182281	>0.05
P61314	RL15_RAT	60S ribosomal protein L15	Rpl15	204	2	22.6391	0.219558	22.8626	0.12796	1.16757	0.10285	>0.05	2	21.734	0.385183	21.9679	0.241296	1.17603	0.185785	>0.05
P61354	RL27_RAT	60S ribosomal protein L27	Rpl27	136	2	21.2037	0.237236	20.947	0.177671	0.836981	0.140256	>0.05
P61589	RHOA_RAT	Transforming protein RhoA	Rhoa Arha Arha2	193	6	26.2969	0.036645	26.294	0.0361875	0.997999	0.0246683	>0.05	5	25.0635	0.0294868	25.0055	0.035948	0.960648	0.0226743	>0.05
P61751	ARF4_RAT	ADP-ribosylation factor 4	Arf4	180	7	27.8412	0.0404042	27.7935	0.0439402	0.96748	0.0304989	>0.05
P61765	STXB1_RAT	Syntaxin-binding protein 1 (N-Sec1) (Protein unc-18 homolog 1) (Unc18-1) (Protein unc-18 homolog A) (Unc-18A) (p67) (rbSec1)	Stxbp1 Unc18a	594	46	32.2927	0.0192821	32.2439	0.0222055	0.966733	0.0151899	>0.05	44	31.0393	0.0374257	31.0025	0.0237262	0.974913	0.0160543	>0.05
P61972	NTF2_RAT	Nuclear transport factor 2 (NTF-2)	Nutf2 Ntf2	127	3	23.3591	0.0581176	23.5086	0.0818107	1.10918	0.0659253	>0.05	2	21.7904	0.0817008	21.696	0.0817714	0.93669	0.0544546	>0.05
P61980	HNRPK_RAT	Heterogeneous nuclear ribonucleoprotein K (hnRNP K) (dC stretch-binding protein) (CSBP)	Hnrnpk Hnrpk	463	17	28.0609	0.027227	28.0453	0.0457821	0.989214	0.0337333	>0.05
P61983	1433G_RAT	14-3-3 protein gamma [Cleaved into: 14-3-3 protein gamma, N-terminally processed]	Ywhag	247	14	31.4776	0.0645535	31.0798	0.0379109	0.759019	0.0296576	<0.001	14	30.3858	0.0288628	30.3589	0.0145193	0.981498	0.00985165	>0.05
P62076	TIM13_RAT	Mitochondrial import inner membrane translocase subunit Tim13	Timm13 Tim13a Timm13a	95	3	25.5249	0.0958931	25.6544	0.0779542	1.09395	0.0551056	>0.05	4	24.46	0.0605561	24.4621	0.0456373	1.00147	0.0313165	>0.05
P62083	RS7_RAT	40S ribosomal protein S7 (S8)	Rps7	194	2	23.3757	0.0371253	23.3801	0.0585582	1.00302	0.0412819	>0.05	4	23.2275	0.15629	23.1124	0.113832	0.923299	0.0730229	>0.05
P62138	PP1A_RAT	Serine/threonine-protein phosphatase PP1-alpha catalytic subunit (PP-1A) (EC 3.1.3.16)	Ppp1ca Ppp1a	330	15	28.2798	0.0672217	28.3095	0.0466145	1.0208	0.0336599	>0.05	12	27.0251	0.0521076	27.1587	0.0252505	1.09697	0.019268	<0.05
P62142	PP1B_RAT	Serine/threonine-protein phosphatase PP1-beta catalytic subunit (PP-1B) (EC 3.1.3.16) (EC 3.1.3.53)	Ppp1cb	327	13	28.1255	0.0726228	28.1564	0.0534308	1.0217	0.0384548	>0.05	12	26.8998	0.0499197	27.0341	0.0258204	1.0975	0.0197588	<0.05
P62161	CALM_RAT	Calmodulin (CaM)	Calm1 Calm Cam Cam1; Calm2 Cam2 Camb; Calm3 Cam3 Camc	149	11	31.6269	0.0905136	31.6457	0.0556065	1.01314	0.0386341	>0.05	12	31.1335	0.0561782	31.1145	0.0461269	0.986864	0.0326623	>0.05
P62168	NCS1_RAT	Neuronal calcium sensor 1 (NCS-1) (Frequenin homolog) (Frequenin-like protein) (Frequenin-like ubiquitous protein)	Ncs1 Flup Freq	190	4	23.5942	0.148736	23.5627	0.122396	0.978424	0.0904568	>0.05	5	22.8446	0.0443088	22.8522	0.0568127	1.00527	0.0379625	>0.05
P62193	PRS4_RAT	26S protease regulatory subunit 4 (P26s4) (26S proteasome AAA-ATPase subunit RPT2) (Proteasome 26S subunit ATPase 1)	Psmc1	440	3	22.893	0.0593707	22.9774	0.0596089	1.06024	0.0437938	>0.05	5	22.7274	0.0336743	22.7552	0.0423478	1.01947	0.0302964	>0.05
P62198	PRS8_RAT	26S protease regulatory subunit 8 (26S proteasome AAA-ATPase subunit RPT6) (Proteasome 26S subunit ATPase 5) (Proteasome subunit p45) (Thyroid hormone receptor-interacting protein 1) (TRIP1) (p45/SUG)	Psmc5 Sug1	406	5	21.187	0.152541	21.2457	0.122678	1.04151	0.10363	>0.05	7	21.761	0.243373	21.5437	0.0701111	0.860196	0.0427083	>0.05
P62243	RS8_RAT	40S ribosomal protein S8	Rps8	208									4	23.5487	0.110266	23.4942	0.0589181	0.962899	0.0406712	>0.05
P62246	RS15A_RAT	40S ribosomal protein S15a	Rps15a	130	3	22.7699	0.181184	22.6627	0.122131	0.928404	0.101072	>0.05	3	21.8512	0.051943	21.8028	0.0573359	0.967045	0.0386769	>0.05
P62250	RS16_RAT	40S ribosomal protein S16	Rps16	146	5	24.2929	0.149983	24.2135	0.109376	0.946466	0.0872457	>0.05
P62260	1433E_RAT	14-3-3 protein epsilon (14-3-3E) (Mitochondrial import stimulation factor L subunit) (MSF L)	Ywhae	255	27	31.8884	0.0738689	32.3054	0.0349018	1.33517	0.0267151	<0.01	26	30.6229	0.016979	30.6131	0.0186012	0.993228	0.0128782	>0.05
P62271	RS18_RAT	40S ribosomal protein S18	Rps18	152									7	23.5355	0.0552923	23.4469	0.0476694	0.940448	0.030086	>0.05
P62278	RS13_RAT	40S ribosomal protein S13	Rps13	151									3	22.7248	0.113508	22.7549	0.121247	1.02108	0.104502	>0.05
P62329	TYB4_RAT	Thymosin beta-4 (T beta 4) [Cleaved into: Hematopoietic system regulatory peptide (Seraspenide)]	Tmsb4x Thyb4 Tmsb4	44	2	23.3725	1.38373	22.7785	1.50011	0.662509	2.56263	>0.05	2	25.9341	0.136569	25.911	0.125765	0.984106	0.0801558	>0.05
P62332	ARF6_RAT	ADP-ribosylation factor 6	Arf6	175	3	22.3214	0.045139	22.4171	0.0451873	1.06862	0.035183	>0.05
P62483	KCAB2_RAT	Voltage-gated potassium channel subunit beta-2 (K(+) channel subunit beta-2) (Kv-beta-2)	Kcnab2 Ckbeta2 Kcnb3	367	8	24.8187	0.0866899	24.6347	0.0433981	0.880236	0.0257776	>0.05	9	24.7981	0.317365	24.639	0.25821	0.895613	0.182044	>0.05
P62628	DLRB1_RAT	Dynein light chain roadblock-type 1 (Bithoraxoid-like protein) (BLP) (robl/LC7-like protein) (Dynein light chain 2A, cytoplasmic) (Dynein-associated protein Km23)	Dynlrb1 Dncl2a Dnlc2a	96									3	21.3619	0.126665	21.2435	0.120555	0.921185	0.0724269	>0.05
P62630	EF1A1_RAT	Elongation factor 1-alpha 1 (EF-1-alpha-1) (Elongation factor Tu) (EF-Tu) (Eukaryotic elongation factor 1 A-1) (eEF1A-1)	Eef1a1 Eef1a	462	20	30.2679	0.0237483	30.3179	0.0335393	1.03529	0.0250178	>0.05	18	29.2	0.0200501	29.214	0.0209876	1.00977	0.0148563	>0.05
P62632	EF1A2_RAT	Elongation factor 1-alpha 2 (EF-1-alpha-2) (Eukaryotic elongation factor 1 A-2) (eEF1A-2) (Statin-S1)	Eef1a2 Eef1al Stn Stnl	463	18	29.7699	0.0286898	29.745	0.0378698	0.982914	0.0266936	>0.05	17	28.8652	0.0247527	28.8455	0.0196212	0.986454	0.0134919	>0.05
P62634	CNBP_RAT	Cellular nucleic acid-binding protein (CNBP) (Zinc finger protein 9)	Cnbp Znf9	177	3	22.5001	0.0810192	22.3474	0.121121	0.89957	0.071725	>0.05	3	20.8821	0.0601752	20.8701	0.0701282	0.991663	0.0494767	>0.05
P62703	RS4X_RAT	40S ribosomal protein S4, X isoform	Rps4x Rps4	263	7	24.1222	0.134126	24.0792	0.0791797	0.970637	0.0610785	>0.05	8	23.2883	0.0997899	23.2838	0.0918467	0.996883	0.064984	>0.05
P62716	PP2AB_RAT	Serine/threonine-protein phosphatase 2A catalytic subunit beta isoform (PP2A-beta) (EC 3.1.3.16)	Ppp2cb	309									14	26.0501	0.0521258	26.0945	0.0661284	1.03119	0.0458806	>0.05
P62738	ACTA_RAT	Actin, aortic smooth muscle (Alpha-actin-2)	Acta2 Actsa Actvs	377									22	31.8388	0.0197168	31.8895	0.0261221	1.03576	0.0192679	>0.05
P62744	AP2S1_RAT	AP-2 complex subunit sigma (Adaptor protein complex AP-2 subunit sigma) (Adaptor-related protein complex 2 subunit sigma) (Clathrin assembly protein 2 sigma small chain) (Clathrin coat assembly protein AP17) (Clathrin coat-associated protein AP17) (Plasma membrane adaptor AP-2 17 kDa protein) (Sigma-adaptin 3b) (Sigma2-adaptin)	Ap2s1 Ap17 Claps2	142	5	25.289	0.0419195	25.3578	0.0476896	1.04884	0.037257	>0.05	3	23.8352	0.0439307	23.8778	0.0436578	1.02994	0.0306847	>0.05
P62747	RHOB_RAT	Rho-related GTP-binding protein RhoB	Rhob Arhb	196	8	26.9078	0.0852114	26.76	0.0623078	0.902646	0.0415054	>0.05	7	25.1922	0.0336435	25.183	0.0405976	0.99362	0.0290097	>0.05
P62749	HPCL1_RAT	Hippocalcin-like protein 1 (Neural visinin-like protein 3) (NVL-3) (NVP-3) (Visinin-like protein 3) (VILIP-3)	Hpcal1	193	6	28.0936	0.107271	28.2097	0.0976713	1.08379	0.0681516	>0.05	6	27.3215	0.114429	27.4525	0.0619869	1.09504	0.0496032	>0.05
P62752	RL23A_RAT	60S ribosomal protein L23a	Rpl23a	156	3	23.3889	0.189249	23.6385	0.124715	1.18888	0.100746	>0.05	3	22.6054	0.182651	22.7101	0.12247	1.07529	0.0929585	>0.05
P62755	RS6_RAT	40S ribosomal protein S6	Rps6	249	2	19.3936	0.512031	19.7539	0.497453	1.28368	0.476091	>0.05	2	21.1575	0.124644	21.082	0.134457	0.949011	0.08137	>0.05
P62762	VISL1_RAT	Visinin-like protein 1 (VILIP) (21 kDa CABP) (Neural visinin-like protein 1) (NVL-1) (NVP-1)	Vsnl1 Visl1	191	15	28.7569	0.110708	28.3257	0.0910502	0.741662	0.0457753	<0.001	13	27.2202	0.0898764	26.8802	0.0845797	0.790039	0.0347497	<0.05
P62775	MTPN_RAT	Myotrophin (Granule cell differentiation protein) (Protein V-1)	Mtpn Gcdp	118	4	27.4802	0.109262	27.558	0.10461	1.05544	0.0777322	>0.05	4	27.1804	0.111575	27.1719	0.0924076	0.994099	0.0604372	>0.05
P62804	H4_RAT	Histone H4 [Cleaved into: Osteogenic growth peptide (OGP)]	Hist1h4b Hist4; Hist1h4m; Hist4h4 H4ft	103	8	30.9415	0.0308504	30.9855	0.070203	1.031	0.0514938	>0.05	9	30.0736	0.0568967	30.0317	0.0355061	0.971353	0.0234837	>0.05
P62815	VATB2_RAT	V-type proton ATPase subunit B, brain isoform (V-ATPase subunit B 2) (Endomembrane proton pump 58 kDa subunit) (Vacuolar proton pump subunit B 2)	Atp6v1b2 Atp6b2 Vat2	511	26	30.5392	0.0252824	30.5333	0.0343368	0.995885	0.0233778	>0.05	26	29.3749	0.0199361	29.4183	0.0126825	1.03049	0.00914828	>0.05
P62824	RAB3C_RAT	Ras-related protein Rab-3C	Rab3c	227	8	26.6704	0.116931	26.7344	0.0655513	1.04535	0.0477088	>0.05	8	25.6216	0.0712567	25.6651	0.0955	1.03056	0.0720357	>0.05
P62828	RAN_RAT	GTP-binding nuclear protein Ran (GTPase Ran) (Ras-like protein TC4) (Ras-related nuclear protein)	Ran	216	6	26.4461	0.0298359	26.4359	0.0386354	0.993004	0.0278086	>0.05	6	25.2834	0.0360641	25.237	0.0386478	0.968325	0.0264662	>0.05
P62832	RL23_RAT	60S ribosomal protein L23	Rpl23	140	2	24.1386	0.118653	24.0686	0.141797	0.9526	0.0976937	>0.05	2	23.1693	0.0736391	23.1893	0.0456204	1.01401	0.032457	>0.05
P62836	RAP1A_RAT	Ras-related protein Rap-1A (Ras-related protein Krev-1)	Rap1a Krev1	184									7	25.2438	0.109487	25.1144	0.0967922	0.914214	0.0601251	>0.05
P62853	RS25_RAT	40S ribosomal protein S25	Rps25	125									3	22.0965	0.0766463	21.9805	0.0918925	0.922774	0.0551213	>0.05
P62856	RS26_RAT	40S ribosomal protein S26	Rps26	115	2	21.1403	0.214678	21.1142	0.207013	0.982078	0.146417	>0.05
P62859	RS28_RAT	40S ribosomal protein S28	Rps28	69	2	21.7361	0.148507	21.6144	0.0994017	0.919109	0.0744788	>0.05
P62870	ELOB_RAT	Transcription elongation factor B polypeptide 2 (Elongin 18 kDa subunit) (Elongin-B) (EloB) (RNA polymerase II transcription factor SIII subunit B) (SIII p18)	Tceb2	118	4	23.9373	0.115677	23.8601	0.113697	0.947932	0.0756265	>0.05	4	22.958	0.0437355	22.9084	0.0277414	0.966223	0.0180229	>0.05
P62882	GBB5_RAT	Guanine nucleotide-binding protein subunit beta-5 (Gbeta5) (Transducin beta chain 5)	Gnb5	353	7	25.2941	0.0669748	25.1814	0.0844449	0.924906	0.0529598	>0.05	5	24.1066	0.0378861	24.1082	0.0604613	1.00113	0.0410328	>0.05
P62890	RL30_RAT	60S ribosomal protein L30	Rpl30	115	3	22.9791	0.108383	23.062	0.112311	1.05912	0.0872476	>0.05	3	21.7744	0.208836	21.7033	0.13585	0.951875	0.0912155	>0.05
P62898	CYC_RAT	Cytochrome c, somatic	Cycs	105	8	29.3055	0.0390858	29.3228	0.047593	1.01205	0.0327762	>0.05	8	28.4466	0.0474691	28.4996	0.0499986	1.0374	0.0348737	>0.05
P62902	RL31_RAT	60S ribosomal protein L31	Rpl31	125	3	23.4953	0.0575585	23.5601	0.071876	1.04592	0.0558555	>0.05	3	22.6061	0.0587321	22.4811	0.0230363	0.917001	0.0146075	>0.05
P62909	RS3_RAT	40S ribosomal protein S3 (EC 4.2.99.18)	Rps3	243	9	25.0342	0.0782819	25.0388	0.0767216	1.00318	0.0572168	>0.05	5	24.0768	0.0763599	24.0925	0.0239468	1.01094	0.016897	>0.05
P62914	RL11_RAT	60S ribosomal protein L11	Rpl11	178	2	21.5536	0.253624	21.4681	0.22718	0.942416	0.164319	>0.05	2	21.8062	0.246493	21.6705	0.186964	0.910231	0.135989	>0.05
P62919	RL8_RAT	60S ribosomal protein L8	Rpl8	257	3	23.8225	0.0744444	23.7958	0.127087	0.98165	0.0901194	>0.05
P62944	AP2B1_RAT	AP-2 complex subunit beta (AP105B) (Adaptor protein complex AP-2 subunit beta) (Adaptor-related protein complex 2 subunit beta) (Beta-2-adaptin) (Beta-adaptin) (Clathrin assembly protein complex 2 beta large chain) (Plasma membrane adaptor HA2/AP2 adaptin beta subunit)	Ap2b1 Clapb1	937	46	29.9786	0.0597833	30.0186	0.0709938	1.02809	0.0507554	>0.05	45	28.7246	0.0409763	28.7303	0.0398285	1.00397	0.0272536	>0.05
P62959	HINT1_RAT	Histidine triad nucleotide-binding protein 1 (EC 3.-.-.-) (17 kDa inhibitor of protein kinase C) (Adenosine 5'-monophosphoramidase) (Protein kinase C inhibitor 1) (Protein kinase C-interacting protein 1) (PKCI-1)	Hint1 Hint Pkci1	126	9	28.4226	0.0268629	28.4699	0.0354192	1.03334	0.0260203	>0.05	9	26.6452	0.147674	26.6828	0.133869	1.02636	0.0900851	>0.05
P62961	YBOX1_RAT	Nuclease-sensitive element-binding protein 1 (CCAAT-binding transcription factor I subunit A) (CBF-A) (DNA-binding protein B) (DBPB) (Enhancer factor I subunit A) (EFI-A) (Y-box transcription factor) (Y-box-binding protein 1) (YB-1)	Ybx1 Msy-1 Nsep1 Yb1	322	3	24.7741	0.160424	24.7146	0.11155	0.959633	0.0682866	>0.05	4	19.8201	0.115204	19.8434	0.13483	1.01627	0.10584	>0.05
P62963	PROF1_RAT	Profilin-1 (Profilin I)	Pfn1	140	7	27.6388	0.0366148	27.6756	0.0377019	1.02582	0.0265147	>0.05	5	26.9478	0.0262662	27.0123	0.0270892	1.04573	0.02002	>0.05
P62966	RABP1_RAT	Cellular retinoic acid-binding protein 1 (Cellular retinoic acid-binding protein I) (CRABP-I)	Crabp1	137									3	19.8439	0.167195	20.0894	0.137892	1.18546	0.0939202	>0.05
P62982	RS27A_RAT	Ubiquitin-40S ribosomal protein S27a (Ubiquitin carboxyl extension protein 80) [Cleaved into: Ubiquitin; 40S ribosomal protein S27a]	Rps27a Uba80 Ubcep1	156	5	28.3267	0.0807606	28.3753	0.0767889	1.0342	0.055166	>0.05	3	27.0495	0.0379645	27.0442	0.0301856	0.996306	0.0207786	>0.05
P62994	GRB2_RAT	Growth factor receptor-bound protein 2 (Adapter protein GRB2) (Protein Ash) (SH2/SH3 adapter GRB2)	Grb2 Ash	217	7	23.9224	0.0386499	24.0255	0.053303	1.07406	0.0395137	>0.05	7	22.9629	0.0765068	22.8394	0.05642	0.917991	0.0372337	>0.05
P63004	LIS1_RAT	Platelet-activating factor acetylhydrolase IB subunit alpha (Lissencephaly-1 protein) (LIS-1) (PAF acetylhydrolase 45 kDa subunit) (PAF-AH 45 kDa subunit) (PAF-AH alpha) (PAFAH alpha)	Pafah1b1 Lis-1 Lis1 Pafaha	410	9	24.8536	0.0979261	24.7335	0.102715	0.920135	0.0640042	>0.05	8	24.5428	0.0969964	24.4793	0.0855532	0.956936	0.0588679	>0.05
P63012	RAB3A_RAT	Ras-related protein Rab-3A	Rab3a	220	10	29.6757	0.044519	29.6654	0.0434966	0.992884	0.0291625	>0.05	10	28.4218	0.0601914	28.3756	0.0707205	0.968497	0.0478737	>0.05
P63018	HSP7C_RAT	Heat shock cognate 71 kDa protein (Heat shock 70 kDa protein 8)	Hspa8 Hsc70 Hsc73	646	41	32.3686	0.00900011	32.7496	0.0118438	1.30222	0.00828352	<0.001	40	31.3226	0.0104699	31.3633	0.0145587	1.02862	0.0104226	<0.05
P63029	TCTP_RAT	Translationally-controlled tumor protein (TCTP) (Lens epithelial protein)	Tpt1 Trt	172	2	23.726	0.146389	23.7531	0.0973949	1.01895	0.06492	>0.05	2	22.725	0.132092	22.796	0.133795	1.05042	0.0938236	>0.05
P63036	DNJA1_RAT	DnaJ homolog subfamily A member 1 (DnaJ-like protein 1) (Heat shock protein J2) (HSJ-2)	Dnaja1 Hsj2 Rdj1	397	5	23.751	0.0535717	23.7144	0.0343507	0.974965	0.0232103	>0.05	5	22.0624	0.0861474	22.1611	0.0842895	1.07078	0.0604544	>0.05
P63039	CH60_RAT	60 kDa heat shock protein, mitochondrial (60 kDa chaperonin) (Chaperonin 60) (CPN60) (HSP-65) (Heat shock protein 60) (HSP-60) (Hsp60) (Mitochondrial matrix protein P1)	Hspd1 Hsp60	573	35	30.6358	0.0405142	30.7002	0.034364	1.04566	0.0235441	>0.05	34	29.496	0.0211859	29.5513	0.0251971	1.03914	0.0179208	>0.05
P63041	CPLX1_RAT	Complexin-1 (Complexin I) (CPX I) (Synaphin-2)	Cplx1	134	7	27.9808	0.056877	27.9356	0.046242	0.969107	0.0312446	>0.05	6	25.9002	0.0629866	25.7943	0.0673446	0.9292	0.0414917	>0.05
P63047	ST4A1_RAT	Sulfotransferase 4A1 (ST4A1) (EC 2.8.2.-) (Brain sulfotransferase-like protein) (rBR-STL) (Nervous system sulfotransferase) (NST)	Sult4a1 Sultx3	284	3	23.2056	0.0608477	23.168	0.111271	0.974246	0.0805406	>0.05
P63079	GBRB3_RAT	Gamma-aminobutyric acid receptor subunit beta-3 (GABA(A) receptor subunit beta-3)	Gabrb3 Gabrb-3	473	2	20.3462	0.151149	20.5423	0.0816569	1.14558	0.0640359	>0.05
P63086	MK01_RAT	Mitogen-activated protein kinase 1 (MAP kinase 1) (MAPK 1) (EC 2.7.11.24) (ERT1) (Extracellular signal-regulated kinase 2) (ERK-2) (MAP kinase isoform p42) (p42-MAPK) (Mitogen-activated protein kinase 2) (MAP kinase 2) (MAPK 2)	Mapk1 Erk2 Mapk Prkm1	358	18	27.8164	0.0545804	28.0334	0.0514673	1.16239	0.0435261	<0.01	19	26.4638	0.0381113	26.5217	0.0453838	1.04098	0.0320241	>0.05
P63088	PP1G_RAT	Serine/threonine-protein phosphatase PP1-gamma catalytic subunit (PP-1G) (EC 3.1.3.16) (Protein phosphatase 1C catalytic subunit)	Ppp1cc	323	12	28.213	0.0764581	28.2376	0.0559709	1.01718	0.0400454	>0.05	11	26.9259	0.0473537	27.061	0.0244369	1.09817	0.0186754	<0.05
P63095	GNAS2_RAT	Guanine nucleotide-binding protein G(s) subunit alpha isoforms short (Adenylate cyclase-stimulating G alpha protein) (G-alpha-8)	Gnas Gnas1	394	9	25.4008	0.0694753	25.3943	0.0475247	0.995505	0.0326485	>0.05
P63100	CANB1_RAT	Calcineurin subunit B type 1 (Protein phosphatase 2B regulatory subunit 1) (Protein phosphatase 3 regulatory subunit B alpha isoform 1)	Ppp3r1 Cna2 Cnb	170	12	28.4391	0.099045	28.5459	0.0941684	1.07681	0.0646234	>0.05	11	27.0823	0.100634	27.129	0.0928727	1.03295	0.0653701	>0.05
P63102	1433Z_RAT	14-3-3 protein zeta/delta (Mitochondrial import stimulation factor S1 subunit) (Protein kinase C inhibitor protein 1) (KCIP-1)	Ywhaz Msfs1	245	20	32.9396	0.0409513	33.2858	0.0296143	1.27124	0.0227543	<0.001	21	31.785	0.0204451	31.8455	0.0195728	1.04283	0.0141214	<0.05
P63142	KCNA2_RAT	Potassium voltage-gated channel subfamily A member 2 (RAK) (RBK2) (RCK5) (Voltage-gated potassium channel subunit Kv1.2)	Kcna2	499	4	22.8642	0.0693574	22.9024	0.0818024	1.02688	0.0594337	>0.05	4	22.065	0.0531338	21.9925	0.0827812	0.951006	0.0540041	>0.05
P63245	GBLP_RAT	Guanine nucleotide-binding protein subunit beta-2-like 1 (Receptor for activated C kinase) (Receptor of activated protein kinase C 1) (RACK1) [Cleaved into: Guanine nucleotide-binding protein subunit beta-2-like 1, N-terminally processed]	Gnb2l1	317	8	24.0482	0.16006	23.7788	0.094791	0.829659	0.054485	>0.05	5	23.9478	0.0824104	24.0592	0.0693195	1.08025	0.0518039	>0.05
P63249	IPKA_RAT	cAMP-dependent protein kinase inhibitor alpha (PKI-alpha) (cAMP-dependent protein kinase inhibitor, muscle/brain isoform)	Pkia	76									2	20.6195	0.0552849	20.6801	0.0417693	1.04286	0.0295895	>0.05
P63319	KPCG_RAT	Protein kinase C gamma type (PKC-gamma) (EC 2.7.11.13)	Prkcg Pkcc Pkcg Prkcc	697	15	27.8784	0.0731404	27.9931	0.0562945	1.08278	0.0424108	>0.05	12	25.8783	0.0438241	25.9344	0.0394851	1.03963	0.0278318	>0.05
P63322	RALA_RAT	Ras-related protein Ral-A	Rala Ral Ral-a	206	4	25.7421	0.0400296	25.711	0.0421	0.978639	0.0294231	>0.05	5	25.3206	0.0252851	25.2692	0.0406171	0.964984	0.0286488	>0.05
P63329	PP2BA_RAT	Serine/threonine-protein phosphatase 2B catalytic subunit alpha isoform (EC 3.1.3.16) (CAM-PRP catalytic subunit) (Calmodulin-dependent calcineurin A subunit alpha isoform)	Ppp3ca Calna	521	19	30.215	0.0457907	30.6148	0.0574339	1.31935	0.0366942	<0.001	20	29.6314	0.0311927	29.6933	0.0326442	1.04382	0.0232058	>0.05
P63331	PP2AA_RAT	Serine/threonine-protein phosphatase 2A catalytic subunit alpha isoform (PP2A-alpha) (EC 3.1.3.16)	Ppp2ca	309	14	27.2894	0.0323984	27.6392	0.0331828	1.27439	0.0233229	<0.001
P67779	PHB_RAT	Prohibitin	Phb	272	12	27.3379	0.0261362	27.3564	0.0363736	1.01291	0.0248188	>0.05	12	26.3622	0.0377851	26.3751	0.0375016	1.00898	0.0264445	>0.05
P67874	CSK2B_RAT	Casein kinase II subunit beta (CK II beta) (Phosvitin)	Csnk2b Ck2n	215	4	24.4905	0.059485	24.5023	0.0274349	1.00823	0.0194076	>0.05	4	22.8774	0.0381713	22.8844	0.0340401	1.00486	0.0236314	>0.05
P68101	IF2A_RAT	Eukaryotic translation initiation factor 2 subunit 1 (Eukaryotic translation initiation factor 2 subunit alpha) (eIF-2-alpha) (eIF-2A) (eIF-2alpha)	Eif2s1 Eif2a	315									4	20.9818	0.13616	21.0369	0.17222	1.03897	0.117371	>0.05
P68136	ACTS_RAT	Actin, alpha skeletal muscle (Alpha-actin-1)	Acta1 Acta	377	20	32.9353	0.0252181	32.9646	0.0294871	1.02052	0.0209897	>0.05
P68255	1433T_RAT	14-3-3 protein theta (14-3-3 protein tau)	Ywhaq	245	17	31.2059	0.0562619	31.307	0.0222148	1.07263	0.0168974	>0.05	18	30.3065	0.0128823	30.2893	0.0221483	0.988172	0.0149464	>0.05
P68370	TBA1A_RAT	Tubulin alpha-1A chain (Alpha-tubulin 1) (Tubulin alpha-1 chain)	Tuba1a Tuba1	451	31	34.9889	0.0207745	35.0287	0.0121297	1.02804	0.00880503	>0.05	32	34.0324	0.0190246	34.0174	0.0140392	0.989651	0.00937596	>0.05
P68403	KPCB_RAT	Protein kinase C beta type (PKC-B) (PKC-beta) (EC 2.7.11.13)	Prkcb Pkcb Prkcb1	671	18	28.1012	0.0667394	28.1956	0.0662788	1.06759	0.0460901	>0.05	17	26.3848	0.0468286	26.463	0.0405113	1.05572	0.0300601	>0.05
P68511	1433F_RAT	14-3-3 protein eta	Ywhah	246	13	31.1467	0.0627939	31.2374	0.0313025	1.06488	0.024482	>0.05	15	30.329	0.0247833	30.2797	0.0198262	0.966349	0.0134173	>0.05
P69682	NECP1_RAT	Adaptin ear-binding coat-associated protein 1 (NECAP endocytosis-associated protein 1) (NECAP-1)	Necap1	277	3	26.3086	0.0884679	26.3728	0.0933629	1.04555	0.0665653	>0.05	6	24.8333	0.073498	24.869	0.0729424	1.02503	0.0534703	>0.05
P69897	TBB5_RAT	Tubulin beta-5 chain	Tubb5	444	44	34.7432	0.0181028	34.7651	0.0165627	1.01527	0.0116744	>0.05	44	33.6197	0.0145706	33.6062	0.0164296	0.990625	0.0113054	>0.05
P70478	APC_RAT	Adenomatous polyposis coli protein (Protein APC)	Apc	2842									4	22.4893	0.0621598	22.5388	0.058014	1.03494	0.0398363	>0.05
P70566	TMOD2_RAT	Tropomodulin-2 (Neuronal tropomodulin) (N-Tmod)	Tmod2 Ntmod	351	6	25.3933	0.0488137	25.4483	0.0148234	1.03885	0.010578	>0.05	8	25.1298	0.034995	25.2256	0.0329774	1.06872	0.024682	>0.05
P70580	PGRC1_RAT	Membrane-associated progesterone receptor component 1 (25-DX) (Acidic 25 kDa protein) (Ventral midline antigen) (VEMA)	Pgrmc1 25dx Lewi Pgrmc	195	5	25.8276	0.140782	25.9604	0.104325	1.09642	0.0769659	>0.05	6	25.312	0.0471008	25.4832	0.0371325	1.12595	0.0307304	<0.05
P70587	LRRC7_RAT	Leucine-rich repeat-containing protein 7 (Densin-180) (Densin) (Protein LAP1)	Lrrc7 Lap1	1490									10	22.95	0.0385861	23.0703	0.0572472	1.08694	0.0452054	>0.05
P70600	FAK2_RAT	Protein-tyrosine kinase 2-beta (EC 2.7.10.2) (Calcium-dependent tyrosine kinase) (CADTK) (Calcium-regulated non-receptor proline-rich tyrosine kinase) (Cell adhesion kinase beta) (CAK-beta) (CAKB) (Focal adhesion kinase 2) (FADK 2) (Proline-rich tyrosine kinase 2)	Ptk2b Fak2 Pyk2	1009	4	23.0248	0.138494	23.0716	0.160981	1.03297	0.126829	>0.05	3	22.1858	0.239781	22.22	0.257861	1.02401	0.207619	>0.05
P70615	LMNB1_RAT	Lamin-B1	Lmnb1	587	8	26.006	0.131915	26.0111	0.133789	1.00355	0.0987669	>0.05
P70627	FOLH1_RAT	Glutamate carboxypeptidase 2 (EC 3.4.17.21) (Folate hydrolase 1) (Folylpoly-gamma-glutamate carboxypeptidase) (FGCP) (Glutamate carboxypeptidase II) (GCPII) (Membrane glutamate carboxypeptidase) (mGCP) (N-acetylated-alpha-linked acidic dipeptidase I) (NAALADase I) (Prostate-specific membrane antigen homolog) (Pteroylpoly-gamma-glutamate carboxypeptidase)	Folh1 Naalad1	752									4	20.099	0.100176	19.9574	0.149684	0.906479	0.105346	>0.05
P70645	BLMH_RAT	Bleomycin hydrolase (BH) (BLM hydrolase) (BMH) (EC 3.4.22.40)	Blmh	454									3	21.9803	0.122758	22.0621	0.0997441	1.05831	0.0695571	>0.05
P81155	VDAC2_RAT	Voltage-dependent anion-selective channel protein 2 (VDAC-2) (B36-VDAC) (Outer mitochondrial membrane protein porin 2)	Vdac2	295	11	29.3791	0.0333593	29.3901	0.0245218	1.00766	0.0173039	>0.05	11	28.1247	0.0317988	28.1729	0.0278494	1.03401	0.01939	>0.05
P81795	IF2G_RAT	Eukaryotic translation initiation factor 2 subunit 3 (Eukaryotic translation initiation factor 2 subunit gamma) (eIF-2-gamma) (PP42)	Eif2s3 Eif2g	472									5	20.7062	0.0575523	20.7688	0.0445774	1.04435	0.0341588	>0.05
P82471	GNAQ_RAT	Guanine nucleotide-binding protein G(q) subunit alpha (Guanine nucleotide-binding protein alpha-q)	Gnaq	359									8	25.5048	0.0273763	25.483	0.0314041	0.984972	0.0217912	>0.05
P82995	HS90A_RAT	Heat shock protein HSP 90-alpha (Heat shock 86 kDa) (HSP 86) (HSP86)	Hsp90aa1 Hsp86 Hspca	733	38	30.7965	0.0264155	30.7844	0.0344474	0.991627	0.0238481	>0.05	39	29.8158	0.0243212	29.8448	0.0188295	1.02031	0.0131903	>0.05
P83868	TEBP_RAT	Prostaglandin E synthase 3 (EC 5.3.99.3) (Cytosolic prostaglandin E2 synthase) (cPGES) (Hsp90 co-chaperone) (Progesterone receptor complex p23) (Telomerase-binding protein p23)	Ptges3 Tebp	160	4	26.2375	0.0651779	26.1557	0.0413912	0.944888	0.0262523	>0.05	3	23.8511	0.0906406	23.8907	0.0732868	1.02786	0.0541758	>0.05
P83941	ELOC_RAT	Transcription elongation factor B polypeptide 1 (Elongin 15 kDa subunit) (Elongin-C) (EloC) (RNA polymerase II transcription factor SIII subunit C) (SIII p15) (Stromal membrane-associated protein SMAP1B homolog)	Tceb1	112	3	24.253	0.053536	24.3537	0.0464702	1.07231	0.0349964	>0.05	3	21.8122	0.0459454	21.7733	0.0607173	0.973377	0.04119	>0.05
P84076	HPCA_RAT	Neuron-specific calcium-binding protein hippocalcin (P23K)	Hpca	193	10	29.0946	0.0886813	29.1977	0.11143	1.0741	0.076277	>0.05	12	28.1274	0.115478	28.2169	0.0756112	1.06402	0.0581607	>0.05
P84079	ARF1_RAT	ADP-ribosylation factor 1	Arf1	181									13	28.8541	0.101822	28.838	0.0771875	0.988946	0.0576367	>0.05
P84083	ARF5_RAT	ADP-ribosylation factor 5	Arf5	180	9	28.7342	0.0417409	28.7698	0.0294088	1.02495	0.0210487	>0.05	9	27.6869	0.077689	27.6988	0.0714809	1.00824	0.051404	>0.05
P84087	CPLX2_RAT	Complexin-2 (Complexin II) (CPX II) (Synaphin-1)	Cplx2	134	8	28.7756	0.0552668	28.7462	0.0354185	0.979793	0.0247805	>0.05	6	27.5254	0.0399667	27.4803	0.0341338	0.969227	0.0225652	>0.05
P84092	AP2M1_RAT	AP-2 complex subunit mu (AP-2 mu chain) (Adaptor protein complex AP-2 subunit mu) (Adaptor-related protein complex 2 subunit mu) (Clathrin assembly protein complex 2 mu medium chain) (Clathrin coat assembly protein AP50) (Clathrin coat-associated protein AP50) (Mu2-adaptin) (Plasma membrane adaptor AP-2 50 kDa protein)	Ap2m1	435	17	27.6787	0.0275223	27.6515	0.0278766	0.981347	0.0188195	>0.05	17	26.5235	0.0564844	26.5619	0.0601149	1.02703	0.0434021	>0.05
P84100	RL19_RAT	60S ribosomal protein L19	Rpl19	196	3	23.7171	0.0961718	23.5946	0.104483	0.918611	0.0750241	>0.05	3	22.9262	0.174814	22.814	0.143278	0.925151	0.102841	>0.05
P84586	RMXRL_RAT	RNA-binding motif protein, X chromosome retrogene-like (Heterogeneous nuclear ribonucleoprotein G retrogene-like) (hnRNP G) (RNA-binding motif protein, X chromosome retrogene) [Cleaved into: RNA-binding motif protein, X chromosome retrogene-like, N-terminally processed]	Rbmxrtl	388									3	23.0024	0.0982795	22.8915	0.0622034	0.926	0.0372151	>0.05
P84817	FIS1_RAT	Mitochondrial fission 1 protein (FIS1 homolog) (rFis1) (Tetratricopeptide repeat protein 11) (TPR repeat protein 11)	Fis1 Ttc11	152	2	25.1562	0.0628724	25.2084	0.0619074	1.03684	0.0452444	>0.05	3	23.9365	0.0480765	23.9019	0.0498066	0.976316	0.036056	>0.05
P84850	D2HDH_RAT	D-2-hydroxyglutarate dehydrogenase, mitochondrial (EC 1.1.99.-)	D2hgdh	535	2	20.5248	0.110314	20.6339	0.0707309	1.07856	0.0509671	>0.05
P85108	TBB2A_RAT	Tubulin beta-2A chain	Tubb2a	445	46	34.6383	0.0154932	34.6638	0.0165812	1.01787	0.0118463	>0.05	46	33.6071	0.0158659	33.5929	0.0130691	0.990175	0.00901768	>0.05
P85515	ACTZ_RAT	Alpha-centractin (Centractin)	Actr1a Ctrn1	376	10	26.3944	0.0684055	26.456	0.0577889	1.04362	0.041673	>0.05	12	25.468	0.0484741	25.5461	0.087576	1.05563	0.0691563	>0.05
P85834	EFTU_RAT	Elongation factor Tu, mitochondrial	Tufm	452	18	27.7845	0.040237	27.8408	0.0410869	1.03982	0.0293655	>0.05	17	27.3255	0.0530707	27.3631	0.0461286	1.0264	0.0322658	>0.05
P85845	FSCN1_RAT	Fascin	Fscn1	493	15	27.9835	0.0556711	27.9893	0.0519078	1.00406	0.0353245	>0.05	15	26.6572	0.0438747	26.6779	0.030262	1.01446	0.0215014	>0.05
P85970	ARPC2_RAT	Actin-related protein 2/3 complex subunit 2 (Arp2/3 complex 34 kDa subunit) (p34-ARC)	Arpc2	300	13	25.9925	0.0279143	26.0557	0.0574533	1.04478	0.0434111	>0.05	12	24.3786	0.0525344	24.4333	0.0362364	1.03867	0.0262456	>0.05
P85971	6PGL_RAT	6-phosphogluconolactonase (6PGL) (EC 3.1.1.31)	Pgls	257	4	23.5576	0.0681045	23.6851	0.0759487	1.0924	0.0540929	>0.05	6	22.6035	0.0990959	22.635	0.0806889	1.02207	0.0533517	>0.05
P85972	VINC_RAT	Vinculin (Metavinculin)	Vcl	1066	6	23.047	0.0422473	23.0229	0.0545956	0.983481	0.03706	>0.05	7	22.0711	0.0663686	22.1296	0.0926011	1.04134	0.0660251	>0.05
P85973	PNPH_RAT	Purine nucleoside phosphorylase (PNP) (EC 2.4.2.1) (Inosine phosphorylase) (Inosine-guanosine phosphorylase)	Pnp Np	289	12	26.1615	0.0559759	26.1143	0.0472902	0.967789	0.0313523	>0.05	10	24.1567	0.0808071	24.1417	0.0674402	0.989611	0.0460238	>0.05
P97532	THTM_RAT	3-mercaptopyruvate sulfurtransferase (MST) (EC 2.8.1.2)	Mpst	297	5	23.5421	0.051164	23.4997	0.037665	0.971022	0.0265961	>0.05	5	21.9152	0.0503666	21.9824	0.0452536	1.04764	0.0327598	>0.05
P97536	CAND1_RAT	Cullin-associated NEDD8-dissociated protein 1 (Cullin-associated and neddylation-dissociated protein 1) (TBP-interacting protein of 120 kDa A) (TBP-interacting protein 120A) (p120 CAND1)	Cand1 Tip120 Tip120a	1230	28	27.3259	0.0602946	27.3434	0.0583943	1.01219	0.0406375	>0.05	25	26.2621	0.0258737	26.2944	0.0182607	1.0226	0.0128662	>0.05
P97546	NPTN_RAT	Neuroplastin (Glycoprotein 55/65) (gp55/65) (Stromal cell-derived receptor 1) (SDR-1)	Nptn Sdfr1 Sdr1	393	14	27.6489	0.0656857	27.4779	0.0862188	0.888253	0.0535154	>0.05	10	26.455	0.041722	26.4409	0.0287783	0.990262	0.019828	>0.05
P97576	GRPE1_RAT	GrpE protein homolog 1, mitochondrial (Mt-GrpE#1)	Grpel1 Grepel1	217	5	24.0707	0.0573997	24.0485	0.0633894	0.984721	0.0443016	>0.05	4	23.3357	0.118737	23.4546	0.134811	1.08594	0.103809	>0.05
P97685	NFASC_RAT	Neurofascin	Nfasc	1240	25	27.8642	0.0324322	27.8109	0.0259137	0.96372	0.0176924	>0.05	19	25.9538	0.0213496	25.9285	0.0247451	0.982563	0.0169579	>0.05
P97700	M2OM_RAT	Mitochondrial 2-oxoglutarate/malate carrier protein (OGCP) (Solute carrier family 25 member 11)	Slc25a11 Slc20a4	314									11	26.949	0.0372747	27.0483	0.0285046	1.07122	0.0211634	<0.05
P97710	SHPS1_RAT	Tyrosine-protein phosphatase non-receptor type substrate 1 (SHP substrate 1) (SHPS-1) (Brain Ig-like molecule with tyrosine-based activation motifs) (Bit) (CD172 antigen-like family member A) (Inhibitory receptor SHPS-1) (Macrophage fusion receptor) (Macrophage membrane protein MFP150) (Signal-regulatory protein alpha-1) (Sirp-alpha-1) (CD antigen CD172a)	Sirpa Bit Mfr Ptpns1 Shps1 Sirp	509	10	27.2779	0.0578567	27.2748	0.0501615	0.997849	0.0333617	>0.05	10	26.0889	0.0760182	26.0933	0.0921705	1.00305	0.0648071	>0.05
P97756	KKCC1_RAT	Calcium/calmodulin-dependent protein kinase kinase 1 (CaM-KK 1) (CaM-kinase kinase 1) (CaMKK 1) (EC 2.7.11.17) (CaM-kinase IV kinase) (Calcium/calmodulin-dependent protein kinase kinase alpha) (CaM-KK alpha) (CaM-kinase kinase alpha) (CaMKK alpha)	Camkk1	505	2	18.8074	0.288915	18.2239	0.252038	0.667323	0.113723	>0.05
P97829	CD47_RAT	Leukocyte surface antigen CD47 (Integrin-associated protein) (IAP) (CD antigen CD47)	Cd47	303	6	26.5073	0.181748	26.4636	0.123793	0.970168	0.06917	>0.05	5	25.2026	0.14356	25.2184	0.111579	1.011	0.0731501	>0.05
P97834	CSN1_RAT	COP9 signalosome complex subunit 1 (SGN1) (Signalosome subunit 1) (G protein pathway suppressor 1) (GPS-1) (JAB1-containing signalosome subunit 1) (MFH protein)	Gps1 Cops1 Csn1	471	7	23.0243	0.0299754	23.0278	0.0403493	1.00243	0.0282101	>0.05
P97837	DLGP2_RAT	Disks large-associated protein 2 (DAP-2) (PSD-95/SAP90-binding protein 2) (SAP90/PSD-95-associated protein 2) (SAPAP2)	Dlgap2 Dap2	1059									3	21.1112	0.163605	21.2605	0.228614	1.10901	0.185891	>0.05
P97839	DLGP4_RAT	Disks large-associated protein 4 (DAP-4) (PSD-95/SAP90-binding protein 4) (SAP90/PSD-95-associated protein 4) (SAPAP-4)	Dlgap4 Dap4 Sapap4	992	4	22.4797	0.0966072	22.4359	0.0779262	0.970101	0.0580928	>0.05	4	21.5192	0.0469396	21.5815	0.0346697	1.0441	0.0247672	>0.05
P97846	CNTP1_RAT	Contactin-associated protein 1 (Caspr) (Caspr1) (Neurexin IV) (Neurexin-4) (Paranodin) (p190)	Cntnap1 Caspr Nrxn4	1381	12	24.6042	0.0787078	24.5424	0.0682169	0.95812	0.0433803	>0.05	10	22.796	0.0544775	22.8167	0.0548506	1.01441	0.038303	>0.05
Q00566	MECP2_RAT	Methyl-CpG-binding protein 2 (MeCp-2 protein) (MeCp2)	Mecp2	492									4	21.4975	0.129664	21.343	0.165401	0.898433	0.10742	>0.05
Q00715	H2B1_RAT	Histone H2B type 1	0	125	7	29.647	0.0522108	29.7107	0.0675457	1.04513	0.0474414	>0.05
Q00728	H2A4_RAT	Histone H2A type 4 (Histone H2A, testis) (TH2A)	0	130	4	30.4263	0.0983976	30.4249	0.0359399	0.998987	0.0251359	>0.05
Q00981	UCHL1_RAT	Ubiquitin carboxyl-terminal hydrolase isozyme L1 (UCH-L1) (EC 3.4.19.12) (EC 6.-.-.-) (Neuron cytoplasmic protein 9.5) (PGP 9.5) (PGP9.5) (Ubiquitin thioesterase L1)	Uchl1	223	18	31.4355	0.0452943	31.3916	0.0365593	0.970018	0.0250671	>0.05	17	30.2984	0.0325736	30.3108	0.0255292	1.00863	0.0185058	>0.05
Q01062	PDE2A_RAT	cGMP-dependent 3',5'-cyclic phosphodiesterase (EC 3.1.4.17) (Cyclic GMP-stimulated phosphodiesterase) (CGS-PDE) (cGSPDE)	Pde2a	928									21	25.7279	0.0514974	25.8047	0.0463386	1.05464	0.0342718	>0.05
Q01066	PDE1B_RAT	Calcium/calmodulin-dependent 3',5'-cyclic nucleotide phosphodiesterase 1B (Cam-PDE 1B) (EC 3.1.4.17) (63 kDa Cam-PDE)	Pde1b Pde1b1	535	20	27.7881	0.188982	28.5032	0.152565	1.64153	0.0570432	<0.001	20	26.7492	0.186871	27.0722	0.0702885	1.25098	0.0618577	>0.05
Q01205	ODO2_RAT	Dihydrolipoyllysine-residue succinyltransferase component of 2-oxoglutarate dehydrogenase complex, mitochondrial (EC 2.3.1.61) (2-oxoglutarate dehydrogenase complex component E2) (OGDC-E2) (Dihydrolipoamide succinyltransferase component of 2-oxoglutarate dehydrogenase complex) (E2K)	Dlst	454									5	25.7948	0.0731229	25.7861	0.055176	0.993958	0.038432	>0.05
Q01728	NAC1_RAT	Sodium/calcium exchanger 1 (Na(+)/Ca(2+)-exchange protein 1) (Solute carrier family 8 member 1)	Slc8a1 Ncx1	971									6	22.434	0.138836	22.3338	0.085682	0.932863	0.0557329	>0.05
Q01986	MP2K1_RAT	Dual specificity mitogen-activated protein kinase kinase 1 (MAP kinase kinase 1) (MAPKK 1) (EC 2.7.12.2) (ERK activator kinase 1) (MAPK/ERK kinase 1) (MEK 1)	Map2k1 Mek1 Prkmk1	393	20	27.9637	0.0639514	28.056	0.0319671	1.06604	0.0241457	>0.05	19	26.8743	0.056907	26.9551	0.0438455	1.05761	0.0323134	>0.05
Q02563	SV2A_RAT	Synaptic vesicle glycoprotein 2A (Synaptic vesicle protein 2) (Synaptic vesicle protein 2A)	Sv2a Sv2	742	11	27.5679	0.0497335	27.5117	0.0661478	0.96179	0.0432829	>0.05	13	25.7896	0.0737043	25.7709	0.0403895	0.987146	0.0279113	>0.05
Q02874	H2AY_RAT	Core histone macro-H2A.1 (Histone macroH2A1) (mH2A1) (H2A.y) (H2A/y)	H2afy	371	9	25.742	0.0495365	25.7735	0.067429	1.02206	0.0492029	>0.05	8	23.9098	0.141415	24.0695	0.0912718	1.11705	0.0707401	>0.05
Q03114	CDK5_RAT	Cyclin-dependent-like kinase 5 (EC 2.7.11.1) (Cell division protein kinase 5) (Serine/threonine-protein kinase PSSALRE) (Tau protein kinase II catalytic subunit) (TPKII catalytic subunit)	Cdk5 Cdkn5	292	6	23.687	0.122766	23.676	0.0989519	0.992436	0.0696676	>0.05	6	22.3976	0.070948	22.3818	0.0547929	0.98914	0.0382845	>0.05
Q03555	GEPH_RAT	Gephyrin (Putative glycine receptor-tubulin linker protein) [Includes: Molybdopterin adenylyltransferase (MPT adenylyltransferase) (EC 2.7.7.75) (Domain G); Molybdopterin molybdenumtransferase (MPT Mo-transferase) (EC 2.10.1.1) (Domain E)]	Gphn Gph	768	14	25.5124	0.0674607	25.91	0.0659822	1.31729	0.0454206	<0.001	15	24.0621	0.034244	24.1857	0.0325635	1.08945	0.0253984	<0.05
Q03626	MUG1_RAT	Murinoglobulin-1 (Alpha-1 inhibitor 3 variant I) (Alpha-X protein)	Mug1 A1i3	1487	12	25.8105	0.198143	25.5	0.105098	1.253	0.061924	>0.05
Q04400	ADCY5_RAT	Adenylate cyclase type 5 (EC 4.6.1.1) (ATP pyrophosphate-lyase 5) (Adenylate cyclase type V) (Adenylyl cyclase 5)	Adcy5	1262	11	27.0145	0.187804	27.4586	0.128513	1.36045	0.0396465	<0.001
Q04462	SYVC_RAT	Valine--tRNA ligase (EC 6.1.1.9) (Valyl-tRNA synthetase) (ValRS)	Vars Vars2	1264	6	23.4376	0.0879127	23.186	0.0580841	0.839939	0.0344303	<0.05	5	22.3971	0.0961443	22.2905	0.0341577	0.928755	0.0223367	>0.05
Q05175	BASP1_RAT	Brain acid soluble protein 1 (22 kDa neuronal tissue-enriched acidic protein) (Neuronal axonal membrane protein NAP-22)	Basp1 Nap22	220	15	31.9192	0.0772217	31.91	0.0332275	0.993591	0.0229221	>0.05	16	31.2239	0.0267017	31.1589	0.0480352	0.955948	0.0308823	>0.05
Q05683	DCE2_RAT	Glutamate decarboxylase 2 (EC 4.1.1.15) (65 kDa glutamic acid decarboxylase) (GAD-65) (Glutamate decarboxylase 65 kDa isoform)	Gad2 Gad65	585	5	26.3954	0.0875266	26.5119	0.131624	1.08414	0.123348	>0.05	5	24.7834	0.107166	24.8506	0.0813215	1.04767	0.0574677	>0.05
Q05962	ADT1_RAT	ADP/ATP translocase 1 (ADP,ATP carrier protein 1) (Adenine nucleotide translocator 1) (ANT 1) (Solute carrier family 25 member 4)	Slc25a4 Ant1	298	15	30.8087	0.0403267	30.9207	0.052993	1.08072	0.0381034	>0.05	16	29.5051	0.0433563	29.5015	0.0347833	0.99752	0.0235968	>0.05
Q05982	NDKA_RAT	Nucleoside diphosphate kinase A (NDK A) (NDP kinase A) (EC 2.7.4.6) (Metastasis inhibition factor NM23) (Tumor metastatic process-associated protein)	Nme1	152	13	29.6993	0.0534951	29.6068	0.0570251	0.937877	0.0384406	>0.05	13	28.4639	0.0227225	28.472	0.0239492	1.00561	0.016633	>0.05
Q06647	ATPO_RAT	ATP synthase subunit O, mitochondrial (Oligomycin sensitivity conferral protein) (OSCP) (Sperm flagella protein 4)	Atp5o	213	14	29.8338	0.0340256	29.8459	0.0348569	1.00842	0.0241861	>0.05	12	28.7365	0.0735408	28.8328	0.0681928	1.06902	0.0492517	>0.05
Q06QA1	Q06QA1_RAT	NADH-ubiquinone oxidoreductase chain 5 (EC 1.6.5.3)	ND5	609	3	22.741	0.177801	22.8649	0.198126	1.08969	0.156147	>0.05
Q07009	CAN2_RAT	Calpain-2 catalytic subunit (EC 3.4.22.53) (Calcium-activated neutral proteinase 2) (CANP 2) (Calpain M-type) (Calpain-2 large subunit) (Millimolar-calpain) (M-calpain)	Capn2	700	9	24.5044	0.0482611	24.4809	0.0349537	0.983871	0.0232766	>0.05	7	23.0358	0.033421	23.0423	0.0340665	1.00455	0.023173	>0.05
Q07205	IF5_RAT	Eukaryotic translation initiation factor 5 (eIF-5)	Eif5	429	4	23.2387	0.119368	23.3328	0.0672167	1.0674	0.0505045	>0.05	4	20.8716	0.0713518	20.8906	0.0765094	1.01325	0.0534475	>0.05
Q07266	DREB_RAT	Drebrin (Developmentally-regulated brain protein)	Dbn1	707	11	27.5743	0.0466174	27.5809	0.058978	1.0046	0.0407748	>0.05	11	26.7819	0.055043	26.8215	0.0373093	1.0278	0.026517	>0.05
Q07310	NRX3A_RAT	Neurexin-3 (Neurexin III-alpha) (Neurexin-3-alpha)	Nrxn3	1578	4	22.6946	0.113609	22.5445	0.0817585	0.901208	0.0520602	>0.05	4	21.5859	0.049624	21.588	0.0430689	1.00148	0.0301733	>0.05
Q07439	HSP71_RAT	Heat shock 70 kDa protein 1A/1B (Heat shock 70 kDa protein 1/2) (HSP70-1/HSP70-2) (HSP70.1/HSP70.2)	Hspa1a Hsp70-1 Hspa1; Hspa1b Hsp70-2 Hspa2	641									9	28.6289	0.0185125	28.6401	0.0201297	1.0078	0.0144137	>0.05
Q07647	GTR3_RAT	Solute carrier family 2, facilitated glucose transporter member 3 (Glucose transporter type 3, brain) (GLUT-3)	Slc2a3 Glut-3 Glut3	493	8	26.1942	0.0572746	26.176	0.0533365	0.987444	0.0373569	>0.05	7	24.9394	0.0740872	24.9016	0.0551896	0.974148	0.0380085	>0.05
Q07936	ANXA2_RAT	Annexin A2 (Annexin II) (Annexin-2) (Calpactin I heavy chain) (Calpactin-1 heavy chain) (Chromobindin-8) (Lipocortin II) (Placental anticoagulant protein IV) (PAP-IV) (Protein I) (p36)	Anxa2 Anx2	339	3	19.7549	0.162999	19.8898	0.202	1.09802	0.195493	>0.05
Q08163	CAP1_RAT	Adenylyl cyclase-associated protein 1 (CAP 1)	Cap1 Cap Mch1	474	19	29.1134	0.0696525	29.5171	0.0447435	1.32294	0.0316594	<0.001	20	28.091	0.0550612	28.1927	0.0476995	1.07303	0.0366706	>0.05
Q08415	KAT1_RAT	Kynurenine--oxoglutarate transaminase 1, mitochondrial (Kynurenine--oxoglutarate transaminase I) (EC 2.6.1.7) (Cysteine-S-conjugate beta-lyase) (EC 4.4.1.13) (Glutamine transaminase K) (GTK) (Glutamine--phenylpyruvate transaminase) (EC 2.6.1.64) (Kynurenine aminotransferase I) (KATI)	Ccbl1 Kat	457	2	22.2913	0.0789163	22.3171	0.0371909	1.01807	0.0261775	>0.05	2	19.6866	0.13235	19.8823	0.0985062	1.14534	0.082337	>0.05
Q08602	PGTA_RAT	Geranylgeranyl transferase type-2 subunit alpha (EC 2.5.1.60) (Geranylgeranyl transferase type II subunit alpha) (Rab geranyl-geranyltransferase subunit alpha) (Rab GG transferase alpha) (Rab GGTase alpha) (Rab geranylgeranyltransferase subunit alpha)	Rabggta Ggta	567									3	20.961	0.151994	20.9726	0.237557	1.00806	0.198882	>0.05
Q08603	PGTB2_RAT	Geranylgeranyl transferase type-2 subunit beta (EC 2.5.1.60) (Geranylgeranyl transferase type II subunit beta) (GGTase-II-beta) (Rab geranyl-geranyltransferase subunit beta) (Rab GG transferase beta) (Rab GGTase beta) (Rab geranylgeranyltransferase subunit beta) (Type II protein geranyl-geranyltransferase subunit beta)	Rabggtb Ggtb	331	2	21.1886	0.132004	21.1387	0.0950258	0.965996	0.0632123	>0.05
Q08877	DYN3_RAT	Dynamin-3 (EC 3.6.5.5) (Dynamin, testicular) (T-dynamin)	Dnm3 Dyn3	869	15	28.6461	0.0549384	28.587	0.0427828	0.959836	0.0286819	>0.05	17	27.0728	0.0761925	26.9962	0.051681	0.948279	0.0344887	>0.05
Q09073	ADT2_RAT	ADP/ATP translocase 2 (ADP,ATP carrier protein 2) (Adenine nucleotide translocator 2) (ANT 2) (Solute carrier family 25 member 5) [Cleaved into: ADP/ATP translocase 2, N-terminally processed]	Slc25a5 Ant2	298	17	30.6129	0.066628	30.1324	0.0712244	0.716739	0.0341794	<0.001	18	29.5539	0.0464441	29.5495	0.0366099	0.996967	0.0244015	>0.05
Q0GLB6	Q0GLB6_RAT	DPPY splice variant c	Dpp10	800	9	23.8394	0.0578139	23.7368	0.0185412	0.931317	0.0119127	>0.05	5	22.7894	0.0610412	22.6581	0.0580394	0.913028	0.036013	>0.05
Q0VGJ9	Q0VGJ9_RAT	Similar to receptor expression enhancing protein 2	Reep2 LOC682105	254	3	23.3045	0.0912725	23.4194	0.0655033	1.08288	0.0500059	>0.05	3	22.724	0.0642868	22.7503	0.069166	1.01838	0.0481248	>0.05
Q0VGK4	GDPD1_RAT	Glycerophosphodiester phosphodiesterase domain-containing protein 1 (EC 3.1.-.-)	Gdpd1	314	3	22.2423	0.0886921	22.2253	0.0866407	0.988306	0.0597262	>0.05	3	21.2099	0.0475559	21.255	0.04375	1.03174	0.0310026	>0.05
Q0ZFS8	Q0ZFS8_RAT	Protein Srsf3 (RCG61099, isoform CRA_c)	LOC100910660 Sfrs3 Sfrs3_predicted Srsf3 rCG_61099	164									3	23.2256	0.0692072	23.3739	0.0161329	1.1083	0.0123409	>0.05
Q157S1	CRTC1_RAT	CREB-regulated transcription coactivator 1 (Mucoepidermoid carcinoma translocated protein 1 homolog) (Transducer of regulated cAMP response element-binding protein 1) (TORC-1) (Transducer of CREB protein 1)	Crtc1 Mect1 Torc1	630	5	22.3811	0.095974	22.3622	0.122993	0.987015	0.0894958	>0.05	3	21.1997	0.0629104	21.2901	0.0210683	1.06467	0.0156035	>0.05
Q1HCL7	NAKD2_RAT	NAD kinase 2, mitochondrial (EC 2.7.1.23) (Mitochondrial NAD kinase) (NAD kinase domain-containing protein 1, mitochondrial)	Nadk2 Mnadk Nadkd1	425	3	23.7961	0.428481	24.3493	0.155612	1.46741	0.142523	>0.05
Q1JU68	EIF3A_RAT	Eukaryotic translation initiation factor 3 subunit A (eIF3a) (Eukaryotic translation initiation factor 3 subunit 10) (eIF-3-theta)	Eif3a Eif3s10	1354									3	20.2059	0.0724391	20.181	0.0699689	0.982895	0.0472471	>0.05
Q1M168	ATCAY_RAT	Caytaxin	Atcay	372	3	21.9018	0.0949526	21.8678	0.0722045	0.976675	0.0523757	>0.05
Q1RP74	Q1RP74_RAT	Protein LOC100911774 (RCG53953, isoform CRA_a) (Tubulin folding cofactor B) (ZH14 protein)	LOC100911774 Ckap1_predicted Tbcb ZH14 rCG_53953	244	7	24.3602	0.109319	24.4362	0.084202	1.05409	0.0603539	>0.05	7	23.5023	0.0877415	23.3045	0.0587141	0.871877	0.0376969	>0.05
Q1WIM1	CADM4_RAT	Cell adhesion molecule 4 (Immunoglobulin superfamily member 4C) (IgSF4C) (Nectin-like protein 4) (NECL-4)	Cadm4 Igsf4c Necl4	388	6	25.1447	0.0592904	25.1026	0.0741338	0.971213	0.0530053	>0.05
Q1WIM2	CADM2_RAT	Cell adhesion molecule 2 (Immunoglobulin superfamily member 4D) (IgSF4D) (Nectin-like protein 3) (NECL-3) (Synaptic cell adhesion molecule 2) (SynCAM 2)	Cadm2 Igsf4d Necl3	435	9	26.854	0.0913835	26.8423	0.0537196	0.991936	0.0397506	>0.05	9	25.8091	0.0460793	25.778	0.044057	0.978707	0.0302811	>0.05
Q1WIM3	CADM3_RAT	Cell adhesion molecule 3 (Immunoglobulin superfamily member 4B) (IgSF4B) (Nectin-like protein 1) (NECL-1)	Cadm3 Igsf4b Necl1	396	8	26.7948	0.031836	26.8269	0.0332108	1.02251	0.0233691	>0.05	7	25.3161	0.0569071	25.349	0.0388654	1.0231	0.0289091	>0.05
Q2I6B2	Q2I6B2_RAT	V-type proton ATPase subunit a	Atp6v0a1	832	26	28.9085	0.0348167	28.8884	0.0308973	0.986147	0.0216291	>0.05	25	28.0417	0.0314618	28.0393	0.0309962	0.99836	0.0213397	>0.05
Q2IBD4	CTTB2_RAT	Cortactin-binding protein 2 (CortBP2)	Cttnbp2	1649	9	24.1086	0.0956083	24.0762	0.0677464	0.977803	0.0455469	>0.05	7	22.7542	0.0859933	22.4038	0.0834568	0.784407	0.0354245	<0.05
Q2Q0I9	FNDC1_RAT	Fibronectin type III domain-containing protein 1 (Activator of G-protein signaling 8)	Fndc1 Ags8	1779									2	8.90469	2.0521	9.29646	2.36186	1.312	295.907	>0.05
Q2TA68	OPA1_RAT	Dynamin-like 120 kDa protein, mitochondrial (EC 3.6.5.5) (Optic atrophy protein 1 homolog) [Cleaved into: Dynamin-like 120 kDa protein, form S1]	Opa1	960	22	26.0304	0.192951	26.3687	0.103627	1.26426	0.0221024	<0.001	20	24.3099	0.03606	24.4279	0.0276056	1.08521	0.0202827	<0.05
Q32Q06	AP1M1_RAT	AP-1 complex subunit mu-1 (AP-mu chain family member mu1A) (Adaptor protein complex AP-1 subunit mu-1) (Adaptor-related protein complex 1 subunit mu-1) (Clathrin assembly protein complex 1 mu-1 medium chain 1) (Golgi adaptor HA1/AP1 adaptin mu-1 subunit) (Mu-adaptin 1) (Mu1A-adaptin)	Ap1m1	423	2	21.2456	0.136943	21.176	0.158122	0.952949	0.106392	>0.05	2	20.1842	0.0564601	20.098	0.0761282	0.942016	0.0501562	>0.05
Q3B7U9	FKBP8_RAT	Peptidyl-prolyl cis-trans isomerase FKBP8 (PPIase FKBP8) (EC 5.2.1.8) (FK506-binding protein 8) (FKBP-8) (Rotamase)	Fkbp8	403	4	23.1485	0.07093	23.0952	0.0430673	0.963737	0.0299397	>0.05
Q3B8P4	Q3B8P4_RAT	Decapping enzyme, scavenger (m7GpppX diphosphatase)	Dcps rCG_22766	335	3	24.0617	0.251173	24.1142	0.307767	1.03709	0.30418	>0.05
Q3B8Q0	MARE2_RAT	Microtubule-associated protein RP/EB family member 2	Mapre2	326	6	25.838	0.115352	25.9986	0.0639028	1.11771	0.0491693	>0.05	7	25.4353	0.140158	25.5557	0.0931315	1.08705	0.0726256	>0.05
Q3KR72	Q3KR72_RAT	Actin-binding LIM protein 1	Ablim1 Ablim1_predicted	427	5	23.1015	0.0714327	23.0498	0.0666642	0.964744	0.0443219	>0.05	4	20.5967	0.104851	20.5249	0.073227	0.951434	0.048531	>0.05
Q3KR73	KANL3_RAT	KAT8 regulatory NSL complex subunit 3 (NSL complex protein NSL3) (Non-specific lethal 3 homolog)	Kansl3 Nsl3	877									2	17.9609	0.247815	18.4417	0.180622	1.39554	0.173691	>0.05
Q3KR86	MIC60_RAT	MICOS complex subunit Mic60 (Mitochondrial inner membrane protein) (Mitofilin) (Fragment)	Immt Mic60	609	22	28.1629	0.0199488	28.1769	0.0183917	1.00978	0.0129905	>0.05	23	27.1874	0.0407485	27.203	0.0352904	1.01086	0.0252193	>0.05
Q3KRD5	TOM34_RAT	Mitochondrial import receptor subunit TOM34 (Translocase of outer membrane 34 kDa subunit)	Tomm34	309	2	22.4354	0.080653	22.5105	0.0605008	1.05347	0.0438267	>0.05	4	21.7037	0.0419939	21.7468	0.0464332	1.0303	0.0326953	>0.05
Q3KRE0	ATAD3_RAT	ATPase family AAA domain-containing protein 3	Atad3 Atad3a	591	3	23.274	0.0949561	23.4245	0.123482	1.10994	0.0867676	>0.05
Q3KRE2	Q3KRE2_RAT	Methyltransferase like 7A (Methyltransferase like 7A, isoform CRA_b) (Protein Mettl7a)	Mettl7a LOC100362962 rCG_50729	244									3	19.8734	0.094713	19.948	0.0565913	1.05311	0.04043	>0.05
Q3KRE8	TBB2B_RAT	Tubulin beta-2B chain (T beta-15)	Tubb2b Tubb2a	445	46	34.5899	0.0174507	34.6183	0.0167143	1.01986	0.0119363	>0.05
Q3MHS9	Q3MHS9_RAT	Chaperonin containing Tcp1, subunit 6A (Zeta 1) (Chaperonin subunit 6a (Zeta)) (Protein Cct6a)	Cct6a rCG_21714	531	13	26.0627	0.0508551	26.1609	0.046439	1.07048	0.03492	>0.05	11	25.1935	0.0460341	25.182	0.044628	0.992077	0.0287355	>0.05
Q3MIE4	VAT1_RAT	Synaptic vesicle membrane protein VAT-1 homolog (EC 1.-.-.-) (Mitofusin-binding protein) (Protein MIB)	Vat1	404	12	24.9548	0.0653248	25.032	0.114324	1.05498	0.0836858	>0.05	12	23.9983	0.0742534	23.9898	0.0417853	0.994136	0.0293823	>0.05
Q3SWU3	HNRDL_RAT	Heterogeneous nuclear ribonucleoprotein D-like (hnRNP D-like) (hnRNP DL)	Hnrnpdl Hnrpdl	322									4	23.2477	0.0346433	23.3135	0.0322375	1.04671	0.0226812	>0.05
Q3T1H3	Q3T1H3_RAT	Ncam1 protein	Ncam1	849	28	29.9349	0.0224077	29.9344	0.0447293	0.999674	0.0322697	>0.05
Q3T1J1	IF5A1_RAT	Eukaryotic translation initiation factor 5A-1 (eIF-5A-1) (eIF-5A1) (Eukaryotic initiation factor 5A isoform 1) (eIF-5A) (eIF-4D)	Eif5a	154	7	25.3841	0.0776529	25.3042	0.075403	0.946158	0.0518978	>0.05	7	24.4178	0.0873815	24.3741	0.0664232	0.970137	0.0417012	>0.05
Q3T1K5	CAZA2_RAT	F-actin-capping protein subunit alpha-2 (CapZ alpha-2)	Capza2	286	12	27.1265	0.0218774	27.128	0.0342355	1.00107	0.0231489	>0.05	7	25.915	0.0393691	25.9793	0.0182878	1.04563	0.0134715	>0.05
Q3ZAU6	Q3ZAU6_RAT	Protein Rnf14 (RCG49400, isoform CRA_a) (Rnf14 protein)	Rnf14 rCG_49400	479	6	24.1007	0.0944932	24.0596	0.0679151	0.971884	0.0453545	>0.05	3	20.9105	0.0858456	20.8548	0.0636756	0.962163	0.0462661	>0.05
Q3ZB98	BCAS1_RAT	Breast carcinoma-amplified sequence 1 homolog (Protein whose mRNA is enriched in synaptosomes 2) (Pmes-2) (Fragment)	Bcas1	555	10	26.1956	0.0829224	26.0133	0.132536	0.881289	0.106556	>0.05	8	25.0256	0.115143	24.8062	0.108485	0.858912	0.072933	>0.05
Q45QK6	Q45QK6_RAT	Guanine nucleotide-binding protein subunit gamma (Fragment)	Gng2	51									3	26.9504	0.0630403	26.7419	0.0612047	0.86541	0.0370567	<0.05
Q497B0	NIT2_RAT	Omega-amidase NIT2 (EC 3.5.1.3) (Nitrilase homolog 2)	Nit2	276	4	23.5259	0.113962	23.5457	0.103065	1.01387	0.0789422	>0.05	2	21.6766	0.0707811	21.7326	0.0909255	1.03964	0.0660126	>0.05
Q499N5	ACSF2_RAT	Acyl-CoA synthetase family member 2, mitochondrial (EC 6.2.1.-)	Acsf2	615	4	23.5146	0.136443	23.5796	0.052241	1.04612	0.0374358	>0.05	5	21.9475	0.160444	21.9064	0.176011	0.97189	0.126981	>0.05
Q499N6	UBXN1_RAT	UBX domain-containing protein 1 (SAPK substrate protein 1)	Ubxn1 Saks1	297	2	21.2869	0.226591	20.9971	0.225189	0.818049	0.124585	>0.05	3	19.408	0.246261	19.5168	0.206502	1.07833	0.17906	>0.05
Q499P2	Q499P2_RAT	Leukotriene A(4) hydrolase (LTA-4 hydrolase) (EC 3.3.2.6)	Lta4h	611	5	22.0762	0.104226	22.0418	0.137792	0.976434	0.096956	>0.05	5	20.6806	0.121278	20.7712	0.106691	1.0648	0.0747175	>0.05
Q499R7	Q499R7_RAT	Ppa1 protein (Fragment)	Ppa1 Pyp	331									9	24.3487	0.069804	24.3976	0.0327954	1.03453	0.0238654	>0.05
Q4FZT0	STML2_RAT	Stomatin-like protein 2, mitochondrial (SLP-2)	Stoml2	353	4	23.5161	0.0850199	23.6337	0.0474517	1.08488	0.0359258	>0.05	3	22.3306	0.0715634	22.2594	0.0496043	0.951829	0.0337309	>0.05
Q4FZT2	PPME1_RAT	Protein phosphatase methylesterase 1 (PME-1) (EC 3.1.1.89)	Ppme1 Pme1	386	5	23.4683	0.143328	23.3384	0.11922	0.913936	0.0784824	>0.05	7	22.3782	0.0537592	22.308	0.070117	0.952525	0.0449382	>0.05
Q4FZT9	PSMD2_RAT	26S proteasome non-ATPase regulatory subunit 2	Psmd2	908	8	24.4905	0.0537581	24.4169	0.0625521	0.950269	0.0440549	>0.05	5	22.8828	0.0506629	22.9808	0.0748877	1.07029	0.056544	>0.05
Q4FZY0	EFHD2_RAT	EF-hand domain-containing protein D2 (Swiprosin-1)	Efhd2 Sws1	239	8	25.2866	0.127227	24.6438	0.123922	0.640473	0.0721617	<0.001	10	24.7428	0.0671614	24.5454	0.046061	0.872085	0.028105	<0.05
Q4FZZ4	Q4FZZ4_RAT	Pyruvate dehydrogenase E1 component subunit alpha (EC 1.2.4.1)	LOC100365902 Pdha1 rCG_36458	390	22	29.3422	0.0558224	29.2876	0.0405375	0.962899	0.0276969	>0.05
Q4G009	MCTS1_RAT	Malignant T-cell-amplified sequence 1 (MCT-1)	Mcts1	182	2	21.0339	0.103295	21.1209	0.0571973	1.06217	0.04155	>0.05	5	21.0919	0.0561709	21.121	0.0646091	1.02039	0.0454721	>0.05
Q4G061	EIF3B_RAT	Eukaryotic translation initiation factor 3 subunit B (eIF3b) (Eukaryotic translation initiation factor 3 subunit 9) (eIF-3-eta)	Eif3b Eif3s9	797	2	21.7915	0.0840622	21.8148	0.0856298	1.01632	0.0625058	>0.05	4	20.5984	0.11728	20.7671	0.0866117	1.12401	0.0674454	>0.05
Q4G075	ILEUA_RAT	Leukocyte elastase inhibitor A (Serine protease inhibitor EIA) (Serpin B1a)	Serpinb1a	379									2	23.9762	0.121479	23.9926	0.206613	1.01143	0.155276	>0.05
Q4G079	Q4G079_RAT	Protein Aimp1 (Small inducible cytokine subfamily E, member 1)	Aimp1 Scye1 rCG_28432	315	2	17.9242	0.181815	17.3306	0.199961	0.662695	0.0263419	<0.05	2	14.3256	1.23638	14.4643	1.07905	1.10088	0.500504	>0.05
Q4KLH4	PSPC1_RAT	Paraspeckle component 1	Pspc1	522	3	22.8409	0.119493	22.7512	0.069157	0.93972	0.046152	>0.05	4	21.9935	0.0411715	22.0168	0.0329888	1.0163	0.0227635	>0.05
Q4KLZ3	Q4KLZ3_RAT	DAZ associated protein 1 (DAZ associated protein 1, isoform CRA_a) (Protein Dazap1)	Dazap1 rCG_29331	405	2	20.1957	0.103803	20.3075	0.111952	1.08059	0.0854354	>0.05
Q4KM45	CT027_RAT	UPF0687 protein C20orf27 homolog	0	174	3	22.5664	0.103327	22.6354	0.0941613	1.049	0.0700017	>0.05
Q4KM49	SYYC_RAT	Tyrosine--tRNA ligase, cytoplasmic (EC 6.1.1.1) (Tyrosyl-tRNA synthetase) (TyrRS) [Cleaved into: Tyrosine--tRNA ligase, cytoplasmic, N-terminally processed]	Yars	528	5	23.0213	0.100704	23.1866	0.0734572	1.12144	0.0562722	>0.05	5	21.3869	0.0468093	21.4096	0.0666676	1.01588	0.0462862	>0.05
Q4KM60	Q4KM60_RAT	Ribosomal protein (Fragment)	Rpl10a Serpina6	206									3	23.3484	0.35633	23.2494	0.276045	0.9337	0.269874	>0.05
Q4KM69	Q4KM69_RAT	COP9 (Constitutive photomorphogenic) homolog, subunit 5 (Arabidopsis thaliana) (COP9 constitutive photomorphogenic homolog subunit 5 (Arabidopsis)) (Protein Cops5)	Cops5 rCG_30386	334	3	22.4012	0.0655302	22.4308	0.0557704	1.02077	0.0422124	>0.05	3	20.4487	0.151353	20.2607	0.220061	0.877871	0.135457	>0.05
Q4KM71	Q4KM71_RAT	Splicing factor proline/glutamine rich (Polypyrimidine tract binding protein associated)	Sfpq	699									13	24.0476	0.0950103	23.9812	0.0593669	0.955043	0.0404487	>0.05
Q4KM73	KCY_RAT	UMP-CMP kinase (EC 2.7.4.14) (Deoxycytidylate kinase) (CK) (dCMP kinase) (Nucleoside-diphosphate kinase) (EC 2.7.4.6) (Uridine monophosphate/cytidine monophosphate kinase) (UMP/CMP kinase) (UMP/CMPK)	Cmpk1 Cmpk	196	9	25.671	0.0744863	25.7777	0.0657996	1.07674	0.0495579	>0.05	9	24.436	0.0287971	24.3966	0.0455366	0.973055	0.0303052	>0.05
Q4KM74	SC22B_RAT	Vesicle-trafficking protein SEC22b (ER-Golgi SNARE of 24 kDa) (ERS-24) (ERS24) (SEC22 vesicle-trafficking protein homolog B) (SEC22 vesicle-trafficking protein-like 1)	Sec22b Sec22l1	215	5	22.0006	0.209932	21.6851	0.107541	0.803593	0.0668644	>0.05	5	21.5602	0.118641	21.4381	0.118857	0.918838	0.0805037	>0.05
Q4KM98	MFF_RAT	Mitochondrial fission factor	Mff	218	2	22.793	0.123191	22.8359	0.121824	1.03022	0.0903601	>0.05
Q4KMA2	RD23B_RAT	UV excision repair protein RAD23 homolog B	Rad23b	415	5	24.0339	0.107542	24.1145	0.0707716	1.05748	0.05636	>0.05	4	22.7849	0.123049	22.8742	0.0930231	1.0639	0.0629143	>0.05
Q4KSH6	Q4KSH6_RAT	Dual specificity mitogen-activated protein kinase kinase 4	Map2k4	397	7	23.5675	0.0341831	23.5763	0.0380316	1.00613	0.0261471	>0.05	8	23.2196	0.0312621	23.2186	0.0344169	0.999298	0.0242177	>0.05
Q4QQS3	OSCP1_RAT	Protein OSCP1	Oscp1	379	2	21.5305	0.189088	21.5399	0.180727	1.00654	0.125028	>0.05
Q4QQV3	F162A_RAT	Protein FAM162A (E2-induced gene 5 protein homolog)	Fam162a E2ig5	155	4	23.0078	0.0835702	22.9673	0.119703	0.972326	0.0802057	>0.05	2	21.8968	0.0631292	21.974	0.0750704	1.05496	0.0535353	>0.05
Q4QQV4	Q4QQV4_RAT	Dead end homolog 1 (Zebrafish) (Histidyl-tRNA synthetase) (Protein Hars)	Hars Dnd1 rCG_49447	508									6	23.4796	0.109662	23.2993	0.0757418	0.882483	0.0485561	>0.05
Q4QQV8	CHMP5_RAT	Charged multivesicular body protein 5 (Chromatin-modifying protein 5)	Chmp5	219	2	23.9251	0.123136	24.0466	0.0974249	1.0879	0.0691082	>0.05	4	22.9071	0.0631699	22.9413	0.048966	1.02401	0.0349951	>0.05
Q4QR73	Q4QR73_RAT	DnaJ (Hsp40) homolog, subfamily A, member 4 (Protein Dnaja4)	Dnaja4	555	5	22.0052	0.100524	22.0151	0.0690292	1.0069	0.0500311	>0.05	3	19.2027	0.107848	19.2293	0.10034	1.01862	0.0754362	>0.05
Q4QRB4	TBB3_RAT	Tubulin beta-3 chain (Neuron-specific class III beta-tubulin)	Tubb3	450	41	34.3107	0.0144484	34.3218	0.0153871	1.00775	0.010703	>0.05	40	33.2883	0.0142893	33.2895	0.0113672	1.00085	0.00800793	>0.05
Q4R1A4	Q4R1A4_RAT	TRK-fused gene protein	LOC102546978 TFG	282	2	22.1276	0.210625	22.3481	0.129344	1.16516	0.107873	>0.05	4	21.0329	0.0981652	20.8928	0.111677	0.907431	0.0633706	>0.05
Q4V794	Q4V794_RAT	Protein Vps37a (Similar to DNA segment, Chr 8, ERATO Doi 531, expressed, isoform CRA_c) (Vacuolar protein sorting 37 homolog A (S. cerevisiae))	Vps37a MGC116266 rCG_59095	398									2	24.9854	0.141476	25.0804	0.132456	1.06807	0.103699	>0.05
Q4V7B6	Q4V7B6_RAT	LOC499276 protein (Protein LOC499276) (Fragment)	LOC499276	350									2	24.0777	0.345749	24.1821	0.256905	1.07499	0.258663	>0.05
Q4V7C7	ARP3_RAT	Actin-related protein 3 (Actin-like protein 3)	Actr3 Arp3	418	13	27.7564	0.0280589	28.3303	0.0282485	1.48862	0.0196926	<0.001	14	27.0736	0.0473647	27.1981	0.0387611	1.09011	0.0291973	>0.05
Q4V7D2	ROGDI_RAT	Protein rogdi homolog	Rogdi	287	3	24.8311	0.113423	24.8511	0.0739587	1.01392	0.0507135	>0.05	4	23.4385	0.0300697	23.4747	0.0354098	1.0254	0.0250341	>0.05
Q4V8H5	Q4V8H5_RAT	Aspartyl aminopeptidase (Aspartyl aminopeptidase, isoform CRA_c) (Protein Dnpep)	Dnpep rCG_23931	475	6	23.5247	0.052234	23.6228	0.0720237	1.07036	0.0513347	>0.05	6	22.8263	0.0952411	22.9599	0.060835	1.09702	0.0476168	>0.05
Q4V8I9	Q4V8I9_RAT	Protein Ugp2 (UDP-glucose pyrophosphorylase 2) (UDP-glucose pyrophosphorylase 2, isoform CRA_b)	Ugp2 rCG_23243	508	6	23.5842	0.069136	23.6488	0.0444195	1.04576	0.0314841	>0.05	6	21.7188	0.0342469	21.7634	0.0877096	1.03137	0.063352	>0.05
Q4VSI4	UBP7_RAT	Ubiquitin carboxyl-terminal hydrolase 7 (EC 3.4.19.12) (Deubiquitinating enzyme 7) (Herpesvirus-associated ubiquitin-specific protease) (rHAUSP) (Ubiquitin thioesterase 7) (Ubiquitin-specific-processing protease 7)	Usp7 Hausp	1103	5	22.146	0.076798	22.2885	0.0430285	1.10386	0.0322281	>0.05
Q505I9	Q505I9_RAT	Epsin 2 (Epsin-2)	Epn2	640									6	22.3109	0.0519452	22.2329	0.0269073	0.947376	0.017542	>0.05
Q505J2	Q505J2_RAT	Acetylcholinesterase	Ache rCG_21937	614	5	23.5468	0.161713	23.6209	0.0851864	1.05273	0.06001	>0.05
Q52KJ9	Q52KJ9_RAT	Protein Tmx1 (Thioredoxin domain containing 1)	Tmx1 Txndc1 rCG_62384	278	2	22.0877	0.0695405	21.9917	0.0600815	0.935633	0.0394449	>0.05
Q52KK3	S2551_RAT	Solute carrier family 25 member 51 (Mitochondrial carrier triple repeat protein 1)	Slc25a51 Mcart1	298	3	20.5824	0.125107	20.4628	0.0755278	0.920425	0.047047	>0.05
Q52KS1	Q52KS1_RAT	6-phosphofructokinase (EC 2.7.1.11) (Phosphohexokinase)	Pfkm Pfk-M rCG_50717	780	25	28.6325	0.0755154	28.6273	0.058741	0.996412	0.0404552	>0.05	22	27.1339	0.0122461	27.2005	0.0182762	1.04718	0.0134034	<0.01
Q561S0	NDUAA_RAT	NADH dehydrogenase [ubiquinone] 1 alpha subcomplex subunit 10, mitochondrial (Complex I-42kD) (CI-42kD) (NADH-ubiquinone oxidoreductase 42 kDa subunit)	Ndufa10	355	12	28.462	0.0344365	28.8078	0.0286743	1.27087	0.0192207	<0.001	12	27.1621	0.0409512	27.2079	0.0376036	1.03221	0.0272582	>0.05
Q566C7	NUDT3_RAT	Diphosphoinositol polyphosphate phosphohydrolase 1 (DIPP-1) (EC 3.6.1.52) (Diadenosine 5',5'''-P1,P6-hexaphosphate hydrolase 1) (EC 3.6.1.-) (Nucleoside diphosphate-linked moiety X motif 3) (Nudix motif 3)	Nudt3 Dipp Dipp1	168	5	23.9706	0.0277212	23.9898	0.0392477	1.01343	0.0266046	>0.05	4	22.0321	0.0555031	22.0532	0.0632025	1.01472	0.0443853	>0.05
Q566E4	Q566E4_RAT	Heterogeneous nuclear ribonucleoprotein R (Protein Hnrnpr)	Hnrnpr Hnrpr	632	9	23.4867	0.0666612	23.5389	0.0535175	1.03687	0.0380921	>0.05	6	22.3782	0.16837	22.0525	0.0796965	0.7979	0.046369	>0.05
Q568Z9	PHYIP_RAT	Phytanoyl-CoA hydroxylase-interacting protein (Phytanoyl-CoA hydroxylase-associated protein 1) (PAHX-AP1) (PAHXAP1)	Phyhip	330	9	25.0463	0.059165	24.8792	0.0849419	0.890626	0.0518858	>0.05	10	24.1971	0.0482823	24.1471	0.0478675	0.965956	0.0325203	>0.05
Q56A26	Q56A26_RAT	Oligodendrocytic myelin paranodal and inner loop protein (Protein Opalin)	Opalin	142	2	25.1298	0.132175	25.1479	0.165339	1.01269	0.108342	>0.05	4	24.3281	0.16069	24.2418	0.110121	0.941933	0.0797737	>0.05
Q5BJP3	UFM1_RAT	Ubiquitin-fold modifier 1	Ufm1	85	2	24.6309	0.116259	24.7064	0.101405	1.05374	0.088308	>0.05
Q5BJT9	Q5BJT9_RAT	Creatine kinase, mitochondrial 1, ubiquitous (Protein Ckmt1b)	Ckmt1b Ckmt1	418	24	31.2557	0.0310309	31.2923	0.0329781	1.02568	0.0236979	>0.05	23	30.2576	0.0280811	30.1345	0.160843	0.918206	0.0824593	>0.05
Q5BJU0	Q5BJU0_RAT	Protein Rras2 (RCG40097) (Related RAS viral (R-ras) oncogene homolog 2)	Rras2 rCG_40097	204									2	21.1081	0.487603	20.768	0.51401	0.78998	0.437882	>0.05
Q5BJU7	WASF1_RAT	Wiskott-Aldrich syndrome protein family member 1 (WASP family protein member 1) (Protein WAVE-1)	Wasf1 Wave1	559	14	26.1542	0.0428385	26.1558	0.0561444	1.00113	0.0390501	>0.05	16	24.6492	0.0700327	24.7498	0.0544909	1.07221	0.0425793	>0.05
Q5BJZ3	Q5BJZ3_RAT	Nicotinamide nucleotide transhydrogenase (Protein Nnt)	Nnt	1086	6	23.3557	0.0649223	23.8266	0.0374344	1.38594	0.0268405	<0.001	4	21.2791	0.0632143	21.3115	0.0808453	1.02271	0.0558159	>0.05
Q5BK33	Q5BK33_RAT	p55 protein	LOC652956	467									3	19.0217	0.0906071	18.8518	0.131548	0.888892	0.0816943	>0.05
Q5BK63	NDUA9_RAT	NADH dehydrogenase [ubiquinone] 1 alpha subcomplex subunit 9, mitochondrial (Complex I-39kD) (CI-39kD) (NADH-ubiquinone oxidoreductase 39 kDa subunit) (Sperm flagella protein 3)	Ndufa9	377	14	27.7853	0.052189	27.8328	0.0571857	1.03346	0.0423877	>0.05	14	26.4398	0.0551841	26.4871	0.0582197	1.03332	0.0432262	>0.05
Q5BK81	PTGR2_RAT	Prostaglandin reductase 2 (PRG-2) (EC 1.3.1.48) (15-oxoprostaglandin 13-reductase) (Zinc-binding alcohol dehydrogenase domain-containing protein 1)	Ptgr2 Zadh1	351	2	22.2621	0.122352	22.2405	0.0885661	0.985141	0.0603742	>0.05
Q5BKC9	NGEF_RAT	Ephexin-1 (Eph-interacting exchange protein) (Neuronal guanine nucleotide exchange factor)	Ngef	701	13	25.5552	0.0825367	25.5678	0.113277	1.0088	0.0717925	>0.05	12	24.3349	0.0525562	24.4599	0.0640934	1.09052	0.0484317	>0.05
Q5D023	Q5D023_RAT	Cytoplasmic dynein 1 light intermediate chain 2 (Dync1li2 protein)	Dync1li2	492	7	24.2973	0.15889	24.044	0.0581329	0.839007	0.0359465	>0.05
Q5D059	Q5D059_RAT	Hnrpk protein (Protein LOC100363335)	Hnrpk Hnrnpk LOC100359916 LOC100363335	464									17	27.5814	0.0329734	27.587	0.0298602	1.00392	0.0210873	>0.05
Q5EB77	RAB18_RAT	Ras-related protein Rab-18	Rab18	206	5	23.5991	0.0733484	23.5387	0.0352501	0.958984	0.0232496	>0.05	5	22.2412	0.105003	22.0469	0.0476377	0.874019	0.0291792	>0.05
Q5EB81	NB5R1_RAT	NADH-cytochrome b5 reductase 1 (b5R.1) (EC 1.6.2.2)	Cyb5r1	305	3	23.2022	0.100844	23.1932	0.09528	0.993787	0.0644092	>0.05	3	22.2448	0.087021	22.2978	0.0742718	1.03738	0.0486839	>0.05
Q5EGY4	YKT6_RAT	Synaptobrevin homolog YKT6 (EC 2.3.1.-)	Ykt6	198	3	23.6267	0.117168	23.6441	0.103291	1.01211	0.0736813	>0.05	2	20.9857	0.0419413	21	0.0521087	1.00992	0.0362448	>0.05
Q5FVC2	ARHG2_RAT	Rho guanine nucleotide exchange factor 2 (Guanine nucleotide exchange factor H1) (GEF-H1)	Arhgef2	985	6	25.6492	0.176065	25.4187	0.212742	0.852329	0.116992	>0.05	7	23.193	0.182939	22.984	0.168307	0.865147	0.111247	>0.05
Q5FVG4	Q5FVG4_RAT	Protein LOC100911440 (Solute carrier family 25 (Mitochondrial carrier, glutamate), member 22)	LOC100911440 Slc25a22	229	6	26.3696	0.0600347	26.4688	0.0423137	1.07122	0.0305241	>0.05	6	24.8252	0.0780956	24.842	0.0437878	1.01172	0.0309777	>0.05
Q5FVH2	PLD3_RAT	Phospholipase D3 (PLD 3) (EC 3.1.4.4) (Choline phosphatase 3) (Phosphatidylcholine-hydrolyzing phospholipase D3)	Pld3	488	4	21.8322	0.119677	21.6401	0.104883	0.875309	0.0791876	>0.05	3	19.878	0.241745	19.5774	0.168439	0.811948	0.107286	>0.05
Q5FVH8	R7BP_RAT	Regulator of G-protein signaling 7-binding protein (R7 family-binding protein)	Rgs7bp R7bp	257	4	21.0452	0.114586	20.7864	0.065588	0.83579	0.0375319	>0.05	3	20.5212	0.0774483	20.6423	0.0663036	1.08755	0.0497447	>0.05
Q5FVI3	LRC57_RAT	Leucine-rich repeat-containing protein 57	Lrrc57	239	4	26.3146	0.493772	26.345	0.526826	1.02128	0.405371	>0.05	4	21.453	0.0739455	21.2826	0.090107	0.888571	0.0595371	>0.05
Q5FVI4	CEND_RAT	Cell cycle exit and neuronal differentiation protein 1	Cend1	149	3	25.7869	0.133244	25.8037	0.0836438	1.01168	0.0613112	>0.05	5	24.8604	0.0759093	24.9688	0.0384039	1.07798	0.0281896	>0.05
Q5FVI6	VATC1_RAT	V-type proton ATPase subunit C 1 (V-ATPase subunit C 1) (Vacuolar proton pump subunit C 1)	Atp6v1c1	382	14	26.692	0.0346948	27.1456	0.0421097	1.36945	0.0277829	<0.05	11	25.2697	0.0483376	25.2736	0.0475778	1.00269	0.0338057	>0.05
Q5FVJ0	RUFY3_RAT	Protein RUFY3 (Rap2-interacting protein x) (RIPx) (Single axon-regulated protein) (Singar)	Rufy3 Ripx	469	14	25.5638	0.0271475	25.5943	0.0290052	1.02138	0.0211068	>0.05	14	24.4818	0.0548008	24.4869	0.0538154	1.00353	0.0385327	>0.05
Q5FVM4	NONO_RAT	Non-POU domain-containing octamer-binding protein (NonO protein)	Nono	476	4	22.8425	0.169703	22.893	0.0990496	1.03562	0.0680266	>0.05	5	22.7091	0.046817	22.7415	0.0432076	1.02268	0.0302312	>0.05
Q5FVP6	Q5FVP6_RAT	Guanosine monophosphate reductase 2 (Protein Gmpr2)	Gmpr2	286	2	20.6288	0.112927	20.4829	0.110858	0.903849	0.072738	>0.05
Q5FVQ4	MLEC_RAT	Malectin	Mlec	291	3	22.3475	0.253878	22.3936	0.208737	1.03248	0.153756	>0.05	3	20.2224	0.148638	20.4603	0.104535	1.1793	0.083131	>0.05
Q5FWY5	AIP_RAT	AH receptor-interacting protein (AIP) (Aryl-hydrocarbon receptor-interacting protein) (Immunophilin XAP2)	Aip Xap2	330									3	20.5708	0.0981471	20.6192	0.144895	1.03413	0.112145	>0.05
Q5GFD9	IMPCT_RAT	Protein IMPACT (Imprinted and ancient gene protein homolog)	Impact	317	11	26.2945	0.0551787	26.4132	0.0834156	1.08579	0.0735802	>0.05	10	24.8868	0.0551529	25.0129	0.0860501	1.09132	0.069011	>0.05
Q5HZA6	PPCEL_RAT	Prolyl endopeptidase-like (EC 3.4.21.-) (Prolylendopeptidase-like)	Prepl	726	6	22.4743	0.154377	22.4724	0.103605	0.998674	0.0721613	>0.05	3	20.2055	0.13439	20.104	0.0719863	0.932063	0.0437507	>0.05
Q5HZV9	PP1R7_RAT	Protein phosphatase 1 regulatory subunit 7 (Protein phosphatase 1 regulatory subunit 22)	Ppp1r7 Sds22	360	15	26.2204	0.0431427	26.2212	0.0536493	1.00058	0.0362729	>0.05	12	25.058	0.0748265	25.1626	0.0499779	1.0752	0.0373407	>0.05
Q5HZY0	UBXN4_RAT	UBX domain-containing protein 4 (Erasin) (UBX domain-containing protein 2)	Ubxn4 Ubxd2 Ubxdc1	506	2	20.6557	0.186842	20.7114	0.155041	1.03937	0.103718	>0.05
Q5HZY2	SAR1B_RAT	GTP-binding protein SAR1b	Sar1b	198	2	23.2949	0.0661249	23.335	0.0542839	1.02822	0.0390733	>0.05
Q5I0C3	MCCA_RAT	Methylcrotonoyl-CoA carboxylase subunit alpha, mitochondrial (MCCase subunit alpha) (EC 6.4.1.4) (3-methylcrotonyl-CoA carboxylase 1) (3-methylcrotonyl-CoA carboxylase biotin-containing subunit) (3-methylcrotonyl-CoA:carbon dioxide ligase subunit alpha)	Mccc1 Mcca	715									2	21.2152	0.115549	21.3439	0.145008	1.09329	0.112453	>0.05
Q5I0D1	GLOD4_RAT	Glyoxalase domain-containing protein 4	Glod4	298	6	24.4047	0.121625	24.5966	0.0706255	1.14228	0.0501937	>0.05	6	23.7507	0.0334824	23.7254	0.0659848	0.982623	0.046566	>0.05
Q5I0D5	LHPP_RAT	Phospholysine phosphohistidine inorganic pyrophosphate phosphatase (EC 3.1.3.-) (EC 3.6.1.1)	Lhpp	270	3	24.4705	0.164997	24.5649	0.220357	1.06762	0.151971	>0.05	3	22.6179	0.064958	22.7034	0.0841875	1.0611	0.0600555	>0.05
Q5I0D7	PEPD_RAT	Xaa-Pro dipeptidase (X-Pro dipeptidase) (EC 3.4.13.9) (Imidodipeptidase) (Peptidase D) (Proline dipeptidase) (Prolidase)	Pepd	492									2	24.9486	0.11716	25.0002	0.143802	1.03646	0.116544	>0.05
Q5I0G4	SYG_RAT	Glycine--tRNA ligase (EC 6.1.1.14) (Diadenosine tetraphosphate synthetase) (AP-4-A synthetase) (Glycyl-tRNA synthetase) (GlyRS) (Fragment)	Gars	637									5	21.2256	0.0840716	21.1272	0.0881519	0.934074	0.0598366	>0.05
Q5M7A7	CNRP1_RAT	CB1 cannabinoid receptor-interacting protein 1 (CRIP-1)	Cnrip1	164	5	26.6272	0.0712647	26.7129	0.0782533	1.06122	0.0551704	>0.05	3	24.9717	0.0786665	24.9541	0.0829625	0.987884	0.0636386	>0.05
Q5M7T6	Q5M7T6_RAT	ATPase, H+ transporting, lysosomal 38kDa, V0 subunit d1 (Protein Atp6v0d1) (RCG51062, isoform CRA_a)	Atp6v0d1 rCG_51062	351	14	29.166	0.0439307	29.6749	0.0431434	1.42294	0.030058	<0.001	14	28.009	0.0541499	27.9587	0.0397719	0.965737	0.0282781	>0.05
Q5M7U6	ARP2_RAT	Actin-related protein 2 (Actin-like protein 2)	Actr2 Arp2	394	14	26.3436	0.0394092	26.4176	0.0390662	1.05267	0.0283553	>0.05	12	25.5404	0.0285119	25.5528	0.0286092	1.00864	0.0199008	>0.05
Q5M7W5	MAP4_RAT	Microtubule-associated protein 4 (MAP-4)	Map4	1057	14	28.0957	0.0464849	27.9947	0.0512284	0.932427	0.033087	>0.05	15	27.0395	0.0468507	26.9965	0.0488174	0.970595	0.0334455	>0.05
Q5M964	Q5M964_RAT	Fumarate hydratase 1 (Fumarate hydratase, mitochondrial)	Fh Fh1 rCG_20230	507	14	27.2316	0.0459613	27.1417	0.0429126	0.939594	0.0291349	>0.05	15	25.7674	0.042971	25.7524	0.0379794	0.989657	0.0263141	>0.05
Q5M9F7	Q5M9F7_RAT	ARP10 actin-related protein 10 homolog (S. cerevisiae) (Actin-related protein 10 homolog (S. cerevisiae)) (Protein Actr10)	Actr10 rCG_61978	417	3	23.1149	0.0592536	23.1207	0.0463732	1.00408	0.0323572	>0.05	5	22.0303	0.0473559	22.0231	0.0398681	0.995019	0.0273799	>0.05
Q5M9G3	CAPR1_RAT	Caprin-1 (Cytoplasmic activation- and proliferation-associated protein 1) (GPI-anchored protein p137) (GPI-p137) (p137GPI) (RNA granule protein 105)	Caprin1 Gpiap1 Rng105	707									4	20.8797	0.0713445	20.8486	0.0535979	0.978639	0.0355276	>0.05
Q5M9H4	Q5M9H4_RAT	ATPase, Na+/K+ transporting, beta 2 polypeptide (Sodium/potassium-transporting ATPase subunit beta-2)	Atp1b2	290	6	27.1663	0.0629966	27.1186	0.0959203	0.967504	0.0696974	>0.05	8	25.4447	0.0512828	25.4208	0.0658805	0.983559	0.0448394	>0.05
Q5M9H7	Q5M9H7_RAT	DnaJ (Hsp40) homolog, subfamily A, member 2 (DnaJ (Hsp40) homolog, subfamily A, member 2, isoform CRA_b) (DnaJ homolog subfamily A member 2)	Dnaja2 rCG_44346	412	7	24.4498	0.0402594	24.4269	0.043425	0.98428	0.0299709	>0.05	7	23.2839	0.0387041	23.3117	0.0382952	1.01952	0.0264513	>0.05
Q5M9I5	QCR6_RAT	Cytochrome b-c1 complex subunit 6, mitochondrial (Complex III subunit 6) (Complex III subunit VIII) (Cytochrome c1 non-heme 11 kDa protein) (Mitochondrial hinge protein) (Ubiquinol-cytochrome c reductase complex 11 kDa protein)	Uqcrh	89	3	28.2523	0.0451576	28.2532	0.0528975	1.00065	0.0368292	>0.05	3	27.0741	0.0366385	27.1173	0.0293029	1.03041	0.0211857	>0.05
Q5MJ12	FXL16_RAT	F-box/LRR-repeat protein 16 (F-box and leucine-rich repeat protein 16) (Spinal cord injury and regeneration-related protein 1)	Fbxl16 Scirr1	479	12	25.3913	0.0786476	25.3921	0.0861962	1.00058	0.0575009	>0.05	11	23.2396	0.0709602	23.3143	0.0509045	1.05316	0.0384184	>0.05
Q5MPA9	DCLK2_RAT	Serine/threonine-protein kinase DCLK2 (EC 2.7.11.1) (CaMK-like CREB regulatory kinase 2) (CL2) (CLICK-II) (CLICK2) (Doublecortin-like and CAM kinase-like 2) (Doublecortin-like kinase 2)	Dclk2 Dcamkl2 Dck2	767	2	21.1986	0.110744	21.2802	0.104413	1.05815	0.0746264	>0.05	5	19.353	0.0910235	19.5491	0.105962	1.1456	0.0846812	>0.05
Q5PPH0	ENOPH_RAT	Enolase-phosphatase E1 (EC 3.1.3.77) (2,3-diketo-5-methylthio-1-phosphopentane phosphatase) (MASA homolog)	Enoph1 Masa	261	3	23.5475	0.0589618	23.4928	0.0471894	0.962756	0.0318604	>0.05	3	21.7624	0.0611755	21.7647	0.0721032	1.00162	0.0484071	>0.05
Q5PPJ6	Q5PPJ6_RAT	Leucyl-tRNA synthetase (Protein Lars)	Lars	1178									2	19.8302	0.123456	19.8602	0.104527	1.021	0.0689689	>0.05
Q5PPJ9	SHLB2_RAT	Endophilin-B2 (SH3 domain-containing GRB2-like protein B2)	Sh3glb2	404	10	26.2787	0.0643594	26.2166	0.0468769	0.957888	0.0318935	>0.05	13	24.9523	0.0309189	24.9595	0.0346798	1.00504	0.0246936	>0.05
Q5PPN5	TPPP3_RAT	Tubulin polymerization-promoting protein family member 3	Tppp3	176									2	20.7982	0.122813	20.772	0.21282	0.981982	0.156615	>0.05
Q5PQK2	Q5PQK2_RAT	Fusion, derived from t(1216) malignant liposarcoma (Human) (Protein Fus) (RCG39872, isoform CRA_d)	Fus rCG_39872	518	6	24.9183	0.0991396	24.7449	0.0679047	0.886749	0.0435292	>0.05	7	24.097	0.0736961	24.1193	0.0504709	1.01557	0.0371427	>0.05
Q5PQK5	Q5PQK5_RAT	Radixin	Rdx rCG_58165	583	8	24.2902	0.139795	24.247	0.163943	0.970479	0.103769	>0.05
Q5PQL7	ITM2C_RAT	Integral membrane protein 2C [Cleaved into: CT-BRI3]	Itm2c	269	2	22.5911	0.0620154	22.8131	0.0403627	1.16633	0.0328551	<0.01
Q5PQN0	NCALD_RAT	Neurocalcin-delta	Ncald	193	7	28.0716	0.0778087	28.1577	0.0760083	1.06151	0.0545072	>0.05	9	27.1582	0.0738003	27.1298	0.0654972	0.980519	0.0451955	>0.05
Q5PQZ9	Q5PQZ9_RAT	NADH dehydrogenase [ubiquinone] 1 subunit C2	Ndufc2 rCG_39969	120	3	23.6118	0.213859	23.6775	0.200152	1.0466	0.149004	>0.05	3	23.253	0.0597588	23.236	0.0625211	0.98829	0.0425248	>0.05
Q5QD51	AKA12_RAT	A-kinase anchor protein 12 (AKAP-12)	Akap12	1687	8	22.4821	0.0720387	22.4423	0.100061	0.972807	0.0608709	>0.05	4	21.0707	0.107719	20.9909	0.16363	0.946201	0.109974	>0.05
Q5RJK5	Q5RJK5_RAT	Chromobox homolog 3 (HP1 gamma homolog, Drosophila) (Chromobox homolog 3 (HP1 gamma homolog, Drosophila), isoform CRA_a) (Protein LOC100360453)	Cbx3 LOC100360260 LOC100360453 rCG_52399	183	3	22.3598	0.185165	22.5988	0.149292	1.18015	0.117572	>0.05	4	22.0734	0.0763986	22.1849	0.0402226	1.08034	0.0314911	>0.05
Q5RJK6	Q5RJK6_RAT	Inositol polyphosphate-1-phosphatase (Protein Inpp1) (RCG22563)	Inpp1 rCG_22563	396	2	22.1595	0.118382	22.324	0.0775339	1.1208	0.0625653	>0.05	3	21.4022	0.106486	21.5512	0.10832	1.1088	0.0843972	>0.05
Q5RJL0	ERMIN_RAT	Ermin (Juxtanodin) (JN)	Ermn	282	4	24.8572	0.165531	24.9188	0.212938	1.04366	0.181592	>0.05	6	23.293	0.140365	23.2756	0.0990787	0.987992	0.0684304	>0.05
Q5RJN0	Q5RJN0_RAT	NADH dehydrogenase (Ubiquinone) Fe-S protein 7 (NADH dehydrogenase (Ubiquinone) Fe-S protein 7, isoform CRA_d) (Protein Ndufs7)	Ndufs7 rCG_29475	218	7	25.4483	0.0878721	25.3773	0.0652842	0.951976	0.0453536	>0.05	7	24.5344	0.0856567	24.5809	0.0769864	1.03273	0.0546637	>0.05
Q5RJQ4	SIR2_RAT	NAD-dependent protein deacetylase sirtuin-2 (EC 3.5.1.-) (Regulatory protein SIR2 homolog 2) (SIR2-like protein 2)	Sirt2 Sir2l2	350	14	29.96	0.0710432	29.861	0.0812326	0.933687	0.0567917	>0.05	15	27.7462	0.103172	27.7295	0.0590803	0.988488	0.041436	>0.05
Q5RJR2	TWF1_RAT	Twinfilin-1	Twf1 Ptk9	350	3	23.2076	0.0396791	23.1989	0.0297013	0.994006	0.02099	>0.05	3	21.0878	0.0732214	21.1438	0.060766	1.03956	0.0446739	>0.05
Q5RK08	Q5RK08_RAT	Glioblastoma amplified sequence (Protein Gbas)	Gbas LOC498174	281	5	25.9615	0.0788159	26.0536	0.0854206	1.06596	0.0643759	>0.05	5	26.0491	0.0661465	26.1669	0.0631249	1.08505	0.0471973	>0.05
Q5RKG9	Q5RKG9_RAT	Eukaryotic translation initiation factor 4B (Protein Eif4b)	Eif4b rCG_50632	611	3	22.8336	0.229641	22.9331	0.155193	1.07141	0.111056	>0.05	5	22.8012	0.0919736	22.769	0.0746094	0.977911	0.0522789	>0.05
Q5RKI0	WDR1_RAT	WD repeat-containing protein 1	Wdr1	606	19	27.4799	0.0761523	27.4697	0.0524727	0.992942	0.0385299	>0.05	15	26.0214	0.0481751	26.0122	0.0506016	0.993692	0.0350021	>0.05
Q5RKI1	IF4A2_RAT	Eukaryotic initiation factor 4A-II (eIF-4A-II) (eIF4A-II) (EC 3.6.4.13) (ATP-dependent RNA helicase eIF4A-2)	Eif4a2	407	9	25.8157	0.0533045	25.8	0.0588531	0.989219	0.044313	>0.05	8	25.3505	0.069441	25.2918	0.0355546	0.960158	0.0236267	>0.05
Q5RKJ9	Q5RKJ9_RAT	RAB10, member RAS oncogene family (RAB10, member RAS oncogene family, isoform CRA_a) (Ras-related protein Rab-10)	Rab10 rCG_61836	200	7	26.6738	0.0450305	26.6143	0.0686996	0.959596	0.0464906	>0.05	7	26.3081	0.0470639	26.2863	0.050764	0.984979	0.0358206	>0.05
Q5SGE0	LPPRC_RAT	Leucine-rich PPR motif-containing protein, mitochondrial (130 kDa leucine-rich protein) (LRP 130) (Leucine rich protein 157) (rLRP157)	Lrpprc Lrp157	1392	13	24.6564	0.0431709	24.7416	0.0356504	1.06083	0.0262482	>0.05	15	23.5351	0.0470032	23.6298	0.03161	1.06784	0.0244898	>0.05
Q5U1Z9	Q5U1Z9_RAT	Metaxin 2 (Protein Mtx2)	Mtx2 rCG_27294	263	4	23.6408	0.120364	23.5584	0.0773392	0.944485	0.0470155	>0.05	4	22.8256	0.0331996	22.8028	0.0400756	0.984385	0.0271493	>0.05
Q5U211	SNX3_RAT	Sorting nexin-3	Snx3	162	3	22.3035	0.227778	22.2283	0.100612	0.949192	0.0721229	>0.05	3	21.7501	0.0468796	21.5892	0.0482876	0.894466	0.0293304	<0.05
Q5U2N2	Q5U2N2_RAT	Ubiquitin carboxyl-terminal hydrolase (EC 3.4.19.12)	Usp14 rCG_41276	493	5	23.0601	0.0545527	23.39	0.0470883	1.2569	0.0307559	<0.001	3	20.4018	0.0929783	20.5217	0.0711205	1.08661	0.0511953	>0.05
Q5U2N3	PITM1_RAT	Membrane-associated phosphatidylinositol transfer protein 1 (Phosphatidylinositol transfer protein, membrane-associated 1) (PITPnm 1) (Pyk2 N-terminal domain-interacting receptor 2) (NIR-2)	Pitpnm1 Nir2 Pitpnm	1242	3	24.1084	0.120274	23.9575	0.0811311	0.900728	0.0547346	>0.05	4	21.1395	0.0559251	21.1093	0.0803149	0.979232	0.0529717	>0.05
Q5U2P5	Q5U2P5_RAT	Protein C2cd2l (RCG58016) (Transmembrane protein 24)	C2cd2l Tmem24 rCG_58016	706	9	24.8741	0.134354	24.9513	0.089644	1.055	0.0630911	>0.05	9	24.0559	0.164478	23.967	0.083925	0.940219	0.0602674	>0.05
Q5U2R0	MAT2B_RAT	Methionine adenosyltransferase 2 subunit beta (Methionine adenosyltransferase II beta) (MAT II beta)	Mat2b	334	3	22.1687	0.0944222	22.1655	0.0691714	0.99782	0.0470756	>0.05	4	21.7579	0.116472	21.8267	0.0843703	1.04879	0.0535713	>0.05
Q5U2S7	Q5U2S7_RAT	Proteasome (Prosome, macropain) 26S subunit, non-ATPase, 3 (Proteasome (Prosome, macropain) 26S subunit, non-ATPase, 3, isoform CRA_b) (Protein Psmd3)	Psmd3 rCG_33694	530	5	23.3795	0.0866149	23.4972	0.0603018	1.08495	0.0463379	>0.05	5	21.6741	0.0732445	21.6385	0.0423392	0.975626	0.0291472	>0.05
Q5U2X8	Q5U2X8_RAT	Acyl-CoA thioesterase 9 (Protein Acot9) (Similar to acyl-CoA thioesterase, isoform CRA_b)	Acot9 LOC302640 rCG_36383	439	7	23.8821	0.0639498	23.9342	0.081053	1.03682	0.058072	>0.05	6	23.5436	0.0356613	23.4313	0.05807	0.925059	0.0378154	>0.05
Q5U2Z3	NP1L4_RAT	Nucleosome assembly protein 1-like 4	Nap1l4	386	5	24.2005	0.073246	24.1475	0.0509457	0.963956	0.0355523	>0.05	5	23.8219	0.0230599	23.8722	0.0361991	1.03552	0.0265701	>0.05
Q5U300	UBA1_RAT	Ubiquitin-like modifier-activating enzyme 1 (Ubiquitin-activating enzyme E1)	Uba1 Ube1	1058	32	28.7417	0.0235825	28.7932	0.0232741	1.03636	0.0171256	>0.05	28	27.4329	0.0309537	27.5109	0.0363656	1.05555	0.0264281	>0.05
Q5U302	Q5U302_RAT	Catenin (Cadherin associated protein), alpha 1 (Catenin (Cadherin-associated protein), alpha 1, isoform CRA_b) (Protein Ctnna1)	Ctnna1 Catna1 rCG_49560	908	9	24.7318	0.0378089	24.7052	0.0380199	0.981757	0.0260283	>0.05	7	24.1303	0.0495552	24.1769	0.0334028	1.03283	0.0244398	>0.05
Q5U316	RAB35_RAT	Ras-related protein Rab-35	Rab35	201	4	22.8231	0.13181	22.6102	0.0686981	0.862814	0.0389936	>0.05
Q5U318	PEA15_RAT	Astrocytic phosphoprotein PEA-15 (15 kDa phosphoprotein enriched in astrocytes)	Pea15	130	6	26.8358	0.0507381	26.9322	0.0699239	1.06911	0.0520002	>0.05	6	25.6301	0.044031	25.5626	0.0504006	0.954311	0.0360528	>0.05
Q5U330	Q5U330_RAT	Guanylate cyclase 1, soluble, alpha 3 (Guanylate cyclase soluble subunit alpha-3) (RCG62549)	Gucy1a3 rCG_62549	690									3	20.7831	0.129594	21.012	0.079852	1.17191	0.063378	>0.05
Q5U3Z5	Q5U3Z5_RAT	Bri3 binding protein (Protein Bri3bp) (Similar to BRI3-binding protein)	Bri3bp LOC498176 rCG_21431	253									2	18.1214	0.229907	17.84	0.203858	0.822766	0.114691	>0.05
Q5VLR5	Q5VLR5_RAT	BWK4 (Protein Erp44) (RCG60340)	Erp44 Txndc4 rCG_60340	406									2	20.55	0.0928493	20.5592	0.0639363	1.0064	0.0461972	>0.05
Q5WQV5	Q5WQV5_RAT	Radixin	Rdx	583									8	23.3005	0.132009	23.3056	0.186793	1.00354	0.148861	>0.05
Q5XHZ0	TRAP1_RAT	Heat shock protein 75 kDa, mitochondrial (HSP 75) (TNFR-associated protein 1) (Tumor necrosis factor type 1 receptor-associated protein) (TRAP-1)	Trap1 Hsp75	706	5	23.2815	0.119577	23.4481	0.0789055	1.12239	0.0555984	>0.05	6	22.9492	0.115721	23.0641	0.0847764	1.0829	0.0602667	>0.05
Q5XI21	Q5XI21_RAT	Protein Tom1 (Target of myb1 homolog (Chicken))	Tom1	492	4	23.2291	0.133381	23.2035	0.123789	0.982434	0.0873923	>0.05	2	20.46	0.131388	20.5401	0.0781908	1.05715	0.0522782	>0.05
Q5XI32	CAPZB_RAT	F-actin-capping protein subunit beta (CapZ beta)	Capzb	272	13	26.5665	0.0283993	26.6202	0.04009	1.03791	0.0278947	>0.05	11	25.7139	0.0736428	25.7742	0.0666143	1.04265	0.0444176	>0.05
Q5XI34	Q5XI34_RAT	Protein Ppp2r1a (Protein phosphatase 2 (Formerly 2A), regulatory subunit A (PR 65), alpha isoform, isoform CRA_a) (Protein phosphatase 2 (Formerly 2A), regulatory subunit A, alpha isoform)	Ppp2r1a rCG_22961	589	21	29.4144	0.0567668	29.4131	0.0473373	0.999081	0.0326829	>0.05	22	28.465	0.0315455	28.5355	0.0358107	1.05009	0.0260478	>0.05
Q5XI72	IF4H_RAT	Eukaryotic translation initiation factor 4H (eIF-4H) (Williams-Beuren syndrome chromosomal region 1 protein homolog)	Eif4h Wbscr1	248	4	24.0981	0.0819046	24.1534	0.0618717	1.03908	0.044824	>0.05	4	22.4033	0.0627322	22.3721	0.0726348	0.978589	0.0485858	>0.05
Q5XI73	GDIR1_RAT	Rho GDP-dissociation inhibitor 1 (Rho GDI 1) (Rho-GDI alpha)	Arhgdia	204	10	27.7888	0.0497873	27.7332	0.0436329	0.962175	0.0302344	>0.05	9	26.6912	0.0556243	26.6695	0.0186552	0.985077	0.0125653	>0.05
Q5XI77	Q5XI77_RAT	Annexin	Anxa11 rCG_39189	503	5	23.0843	0.0962164	23.0079	0.101059	0.948441	0.0807948	>0.05	5	23.1281	0.0943604	23.1231	0.0985082	0.996522	0.0710492	>0.05
Q5XI78	ODO1_RAT	2-oxoglutarate dehydrogenase, mitochondrial (EC 1.2.4.2) (2-oxoglutarate dehydrogenase complex component E1) (OGDC-E1) (Alpha-ketoglutarate dehydrogenase)	Ogdh Ogdhl	1023	34	28.0365	0.0342466	27.9911	0.034704	0.969062	0.023947	>0.05	33	26.7608	0.0149708	26.7986	0.0352255	1.02656	0.025111	>0.05
Q5XIA5	Q5XIA5_RAT	Coenzyme A synthase (Protein Coasy)	Coasy	563									2	21.3084	0.142254	21.3449	0.162694	1.02561	0.107574	>0.05
Q5XIC0	ECI2_RAT	Enoyl-CoA delta isomerase 2, mitochondrial (EC 5.3.3.8) (Delta(3),delta(2)-enoyl-CoA isomerase) (D3,D2-enoyl-CoA isomerase) (Dodecenoyl-CoA isomerase) (Peroxisomal 3,2-trans-enoyl-CoA isomerase) (pECI)	Eci2 Peci	391	3	21.6454	0.0836901	21.7237	0.103896	1.05572	0.0786187	>0.05
Q5XIC6	Q5XIC6_RAT	Proteasome (Prosome, macropain) 26S subunit, non-ATPase, 12 (Protein Psmd12)	Psmd12	456	5	24.8938	0.125123	24.9722	0.102449	1.05584	0.0803778	>0.05	5	22.7714	0.0536132	22.9982	0.0578811	1.17029	0.0468265	<0.05
Q5XID1	CPIN1_RAT	Anamorsin (Cytokine-induced apoptosis inhibitor 1) (Fe-S cluster assembly protein DRE2 homolog)	Ciapin1	309	3	22.5892	0.0991186	22.7029	0.12278	1.08202	0.0918826	>0.05
Q5XIE6	HIBCH_RAT	3-hydroxyisobutyryl-CoA hydrolase, mitochondrial (EC 3.1.2.4) (3-hydroxyisobutyryl-coenzyme A hydrolase) (HIB-CoA hydrolase) (HIBYL-CoA-H)	Hibch	385	3	22.067	0.0538288	22.0396	0.0479782	0.981219	0.0321202	>0.05	3	20.3724	0.0593805	20.3317	0.0647463	0.972186	0.0437508	>0.05
Q5XIF3	NDUS4_RAT	NADH dehydrogenase [ubiquinone] iron-sulfur protein 4, mitochondrial (Complex I-18 kDa) (CI-18 kDa) (NADH-ubiquinone oxidoreductase 18 kDa subunit)	Ndufs4	175	6	26.2286	0.0535015	26.1896	0.0498683	0.973359	0.0339805	>0.05	5	25.382	0.0348224	25.4574	0.0430568	1.05365	0.0310403	>0.05
Q5XIF6	TBA4A_RAT	Tubulin alpha-4A chain (Alpha-tubulin 4) (Tubulin alpha-4 chain)	Tuba4a Tuba4	448	30	34.7276	0.0181826	34.7593	0.0136204	1.02217	0.00967137	>0.05	30	33.715	0.0155897	33.6991	0.0108774	0.989015	0.0072921	>0.05
Q5XIG4	OCAD1_RAT	OCIA domain-containing protein 1	Ociad1	247	5	22.6641	0.0672508	22.7857	0.0736506	1.08794	0.0539185	>0.05	5	21.8285	0.0726642	21.873	0.0681416	1.03134	0.0515474	>0.05
Q5XIG8	STRAP_RAT	Serine-threonine kinase receptor-associated protein (UNR-interacting protein)	Strap Unrip	350	6	23.5752	0.0779383	23.5963	0.0448987	1.01474	0.0314929	>0.05	5	21.1745	0.0556682	21.2021	0.0876463	1.01934	0.0634789	>0.05
Q5XIH3	Q5XIH3_RAT	NADH dehydrogenase (Ubiquinone) flavoprotein 1 (NADH dehydrogenase (Ubiquinone) flavoprotein 1, isoform CRA_a) (Protein LOC100911329)	Ndufv1 LOC100911329 rCG_47623	464	20	28.7972	0.0260474	28.8032	0.0242109	1.00415	0.0165693	>0.05	22	27.5924	0.0204304	27.6374	0.0231439	1.03168	0.0164798	>0.05
Q5XIH7	PHB2_RAT	Prohibitin-2 (B-cell receptor-associated protein BAP37) (BAP-37)	Phb2 Bcap37	299	12	27.4005	0.0494384	27.4818	0.0528042	1.05796	0.0368148	>0.05	12	25.9819	0.025853	26.0248	0.025898	1.03017	0.018828	>0.05
Q5XIJ3	Q5XIJ3_RAT	Isocitrate dehydrogenase [NAD] subunit, mitochondrial (EC 1.1.1.41)	Idh3g	393	14	27.5286	0.0421879	27.5899	0.0337309	1.0434	0.0239445	>0.05	12	26.0412	0.0297956	26.0135	0.018448	0.981013	0.0125059	>0.05
Q5XIL1	Q5XIL1_RAT	ATPase, H+ transporting, lysosomal V1 subunit H	Atp6v1h	441									16	26.2968	0.051915	26.3716	0.0505284	1.05326	0.0371414	>0.05
Q5XIM5	CDV3_RAT	Protein CDV3 homolog	Cdv3	236	4	24.8759	0.277435	25.1666	0.193966	1.22318	0.13634	>0.05
Q5XIM7	Q5XIM7_RAT	Lysine--tRNA ligase (EC 6.1.1.6) (Lysyl-tRNA synthetase)	Kars rCG_51508	626	4	23.243	0.119847	23.3205	0.160313	1.05523	0.112433	>0.05	3	24.2872	0.11106	24.3339	0.0767877	1.03291	0.0540505	>0.05
Q5XIM9	TCPB_RAT	T-complex protein 1 subunit beta (TCP-1-beta) (CCT-beta)	Cct2 Cctb	535	14	25.978	0.0978736	26.0231	0.0416828	1.03181	0.0302376	>0.05	14	24.9404	0.0516012	24.9655	0.0426347	1.01757	0.0285415	>0.05
Q5XIN6	LETM1_RAT	LETM1 and EF-hand domain-containing protein 1, mitochondrial (Leucine zipper-EF-hand-containing transmembrane protein 1)	Letm1	739	17	26.6518	0.0405705	27.0457	0.0412584	1.31395	0.0277109	<0.001	17	25.4979	0.0417179	25.6154	0.0604895	1.08485	0.0454716	>0.05
Q5XIT1	MARE3_RAT	Microtubule-associated protein RP/EB family member 3 (EB1 protein family member 3) (EBF3) (End-binding protein 3) (EB3) (RP3)	Mapre3	281	11	26.4912	0.0347685	26.5407	0.0796488	1.0349	0.056995	>0.05	8	25.7808	0.0552336	25.7747	0.0357373	0.995736	0.0250133	>0.05
Q5XIU9	PGRC2_RAT	Membrane-associated progesterone receptor component 2	Pgrmc2	217									3	22.8139	0.144018	23.0171	0.10674	1.15125	0.0842933	>0.05
Q5Y9B8	Q5Y9B8_RAT	GTPase activating protein testicular GAP1	tGap1	1288	2	21.3842	0.181173	21.3222	0.192756	0.957938	0.144384	>0.05
Q60587	ECHB_RAT	Trifunctional enzyme subunit beta, mitochondrial (TP-beta) [Includes: 3-ketoacyl-CoA thiolase (EC 2.3.1.16) (Acetyl-CoA acyltransferase) (Beta-ketothiolase)]	Hadhb	475	2	21.3821	0.320427	21.7952	0.172019	1.33151	0.15126	>0.05	3	21.5303	0.0888498	21.4595	0.0658165	0.952103	0.0455613	>0.05
Q62609	NOE1_RAT	Noelin (1B426B) (Neuronal olfactomedin-related ER localized protein) (Olfactomedin-1) (Pancortin)	Olfm1 D2Sut1e Noe1 Noel Noel1	485	4	22.282	0.119299	22.0874	0.0732879	0.873789	0.0489972	>0.05	3	20.569	0.0908953	20.4616	0.0567568	0.928226	0.0378565	>0.05
Q62625	MLP3B_RAT	Microtubule-associated proteins 1A/1B light chain 3B (Autophagy-related protein LC3 B) (Autophagy-related ubiquitin-like modifier LC3 B) (MAP1 light chain 3-like protein 2) (MAP1A/MAP1B light chain 3 B) (MAP1A/MAP1B LC3 B) (Microtubule-associated protein 1 light chain 3 beta)	Map1lc3b Map1alc3 Map1lc3	142									2	24.9514	0.106016	24.8975	0.121015	0.963321	0.0744498	>0.05
Q62634	VGLU1_RAT	Vesicular glutamate transporter 1 (VGluT1) (Brain-specific Na(+)-dependent inorganic phosphate cotransporter) (Solute carrier family 17 member 7)	Slc17a7 Bnpi Vglut1	560	8	25.7856	0.0486726	25.6321	0.0556191	0.899071	0.0343199	>0.05	8	25.2325	0.0639711	25.1544	0.0444271	0.947314	0.0301693	>0.05
Q62636	RAP1B_RAT	Ras-related protein Rap-1b (GTP-binding protein smg p21B)	Rap1b	184	6	26.6	0.0805868	26.7669	0.104805	1.12266	0.0874006	>0.05	7	25.1453	0.128561	25.0079	0.118007	0.909134	0.0739586	>0.05
Q62656	PTPRZ_RAT	Receptor-type tyrosine-protein phosphatase zeta (R-PTP-zeta) (EC 3.1.3.48) (3F8 chondroitin sulfate proteoglycan) (3H1 keratan sulfate proteoglycan) (Phosphacan)	Ptprz1 Ptprz Ptpz	2316	13	28.8529	0.0704036	28.8074	0.0529562	0.968919	0.0366841	>0.05	13	26.9702	0.163937	26.9954	0.1947	1.0176	0.142639	>0.05
Q62658	FKB1A_RAT	Peptidyl-prolyl cis-trans isomerase FKBP1A (PPIase FKBP1A) (EC 5.2.1.8) (12 kDa FK506-binding protein) (12 kDa FKBP) (FKBP-12) (FK506-binding protein 1A) (FKBP-1A) (Immunophilin FKBP12) (Rotamase)	Fkbp1a Fkbp1	108	10	28.2543	0.144399	28.3403	0.11298	1.06136	0.0831172	>0.05	9	26.9422	0.094604	27.0282	0.0628526	1.06142	0.0454142	>0.05
Q62670	Q62670_RAT	0 beta-2 globin	0 beta-2 globin	147	8	30.7474	0.156671	30.5281	0.0955698	0.858969	0.0591328	>0.05
Q62688	PLCL1_RAT	Inactive phospholipase C-like protein 1 (PLC-L1) (PRIP1) (Phospholipase C-related but catalytically inactive protein) (p130)	Plcl1	1096	5	23.9089	0.0780866	23.9725	0.0993775	1.04511	0.0698929	>0.05	4	21.4213	0.0677456	21.4806	0.0809536	1.04196	0.0637427	>0.05
Q62696	DLG1_RAT	Disks large homolog 1 (Synapse-associated protein 97) (SAP-97) (SAP97)	Dlg1 Dlgh1	911									13	24.839	0.0319818	24.8318	0.0387241	0.995065	0.0259992	>0.05
Q62698	DC1L2_RAT	Cytoplasmic dynein 1 light intermediate chain 2 (Dynein light intermediate chain 2, cytosolic) (LIC-2) (LIC53/55)	Dync1li2 Dncli2	497									5	23.9591	0.120246	23.9189	0.0703606	0.972563	0.046572	>0.05
Q62703	RCN2_RAT	Reticulocalbin-2 (Calcium-binding protein ERC-55) (Taipoxin-associated calcium-binding protein 49) (TCBP-49)	Rcn2 Erc55	320	3	22.9863	0.0586113	22.7375	0.060261	0.841619	0.037372	<0.01	3	20.9769	0.0708193	21.0609	0.0866663	1.05997	0.0639808	>0.05
Q62717	CAPS1_RAT	Calcium-dependent secretion activator 1 (Calcium-dependent activator protein for secretion 1) (CAPS-1) (rCAPS)	Cadps Caps Caps1	1289	23	26.4579	0.0495981	26.465	0.0530673	1.00496	0.0399702	>0.05	23	24.6734	0.067799	24.6024	0.0230037	0.952001	0.0153716	>0.05
Q62733	LAP2_RAT	Lamina-associated polypeptide 2, isoform beta (Thymopoietin isoform beta) (TP beta)	Tmpo Lap2	452	3	22.4751	0.116387	22.5486	0.144112	1.05233	0.0905305	>0.05
Q62760	TOM20_RAT	Mitochondrial import receptor subunit TOM20 homolog (Mitochondrial 20 kDa outer membrane protein) (Outer mitochondrial membrane receptor Tom20)	Tomm20	145									3	21.7725	0.172797	21.756	0.104081	0.988609	0.0732822	>0.05
Q62768	UN13A_RAT	Protein unc-13 homolog A (Munc13-1)	Unc13a Unc13h1	1735	2	20.4185	0.314843	20.2302	0.106908	0.877668	0.0618632	>0.05
Q62785	HAP28_RAT	28 kDa heat- and acid-stable phosphoprotein (PDGF-associated protein) (PAP) (PDGFA-associated protein 1) (PAP1)	Pdap1 Haspp28	181	3	23.3159	0.0765822	23.2465	0.054861	0.953026	0.0356678	>0.05	5	22.4543	0.111106	22.2724	0.0721667	0.88153	0.0458075	>0.05
Q62813	LSAMP_RAT	Limbic system-associated membrane protein (LSAMP)	Lsamp Lamp	338	8	27.4894	0.0633349	27.4537	0.0557326	0.975531	0.0396927	>0.05	8	26.4938	0.0374208	26.4243	0.0453442	0.953	0.029909	>0.05
Q62826	HNRPM_RAT	Heterogeneous nuclear ribonucleoprotein M (hnRNP M) (M4 protein)	Hnrnpm Hnrpm	690	9	24.6224	0.0497959	24.6862	0.046521	1.04519	0.0339757	>0.05
Q62829	PAK3_RAT	Serine/threonine-protein kinase PAK 3 (EC 2.7.11.1) (Beta-PAK) (p21-activated kinase 3) (PAK-3) (p65-PAK)	Pak3	544									6	22.4133	0.0641921	22.4866	0.0840478	1.05213	0.0636301	>0.05
Q62848	ARFG1_RAT	ADP-ribosylation factor GTPase-activating protein 1 (ARF GAP 1) (ADP-ribosylation factor 1 GTPase-activating protein) (ARF1 GAP) (ARF1-directed GTPase-activating protein)	Arfgap1 Arf1gap	415	7	24.519	0.16084	24.7208	0.0743522	1.15017	0.0589716	>0.05	6	23.3189	0.0507302	23.4794	0.0524848	1.11769	0.0400088	<0.05
Q62868	ROCK2_RAT	Rho-associated protein kinase 2 (EC 2.7.11.1) (Rho-associated, coiled-coil-containing protein kinase 2) (Rho-associated, coiled-coil-containing protein kinase II) (ROCK-II) (RhoA-binding kinase 2) (p150 ROK-alpha) (ROKalpha) (p164 ROCK-2)	Rock2	1388	4	21.5042	0.0725178	21.392	0.0627618	0.925178	0.0417466	>0.05	6	21.4134	0.0593305	21.3729	0.0630718	0.972342	0.0411326	>0.05
Q62871	DC1I2_RAT	Cytoplasmic dynein 1 intermediate chain 2 (Cytoplasmic dynein intermediate chain 2) (Dynein intermediate chain 2, cytosolic) (DH IC-2)	Dync1i2 Dnci2 Dncic2	638	4	23.2731	0.107685	23.0044	0.0890023	0.830039	0.0473605	>0.05	2	20.2154	0.114097	20.2793	0.0815698	1.04528	0.0594588	>0.05
Q62876	SNG1_RAT	Synaptogyrin-1 (p29)	Syngr1	234	2	26.6471	0.0606543	26.6026	0.0471308	0.96966	0.0306905	>0.05	2	25.6515	0.0786706	25.5877	0.0694675	0.956766	0.049317	>0.05
Q62881	NOL3_RAT	Nucleolar protein 3 (Apoptosis repressor with CARD)	Nol3 Arc	221	2	21.1155	0.129416	21.0477	0.11965	0.954047	0.0881095	>0.05
Q62888	NLGN2_RAT	Neuroligin-2	Nlgn2	836	5	22.655	0.0722453	22.7144	0.0725794	1.04202	0.0512419	>0.05
Q62889	NLGN3_RAT	Neuroligin-3 (Gliotactin homolog)	Nlgn3	848	4	23.2323	0.0601368	23.3075	0.0868099	1.05349	0.0616733	>0.05	4	22.4731	0.0576369	22.6584	0.0319955	1.13707	0.0252875	<0.05
Q62910	SYNJ1_RAT	Synaptojanin-1 (EC 3.1.3.36) (Synaptic inositol 1,4,5-trisphosphate 5-phosphatase 1)	Synj1	1574	38	28.2089	0.0627781	28.1907	0.0485875	0.987423	0.033132	>0.05	35	27.2969	0.0210081	27.2902	0.0316861	0.995359	0.0219758	>0.05
Q62915	CSKP_RAT	Peripheral plasma membrane protein CASK (EC 2.7.11.1) (Calcium/calmodulin-dependent serine protein kinase)	Cask	909	6	23.7261	0.0789782	23.6565	0.103884	0.952911	0.0705153	>0.05	7	22.8218	0.0520097	22.8842	0.0458568	1.04421	0.0351191	>0.05
Q62936	DLG3_RAT	Disks large homolog 3 (PSD-95/SAP90-related protein 1) (Synapse-associated protein 102) (SAP-102) (SAP102)	Dlg3 Dlgh3	849	12	25.5355	0.0771055	25.4544	0.0549742	0.945313	0.0373126	>0.05
Q62950	DPYL1_RAT	Dihydropyrimidinase-related protein 1 (DRP-1) (Collapsin response mediator protein 1) (CRMP-1)	Crmp1 Dpysl1	572	33	30.9725	0.0290175	30.9774	0.0371357	1.00336	0.026379	>0.05	30	29.7524	0.0360837	29.7233	0.0404521	0.980055	0.0285057	>0.05
Q62951	DPYL4_RAT	Dihydropyrimidinase-related protein 4 (DRP-4) (Collapsin response mediator protein 3) (CRMP-3) (UNC33-like phosphoprotein 4) (ULIP-4) (Fragment)	Dpysl4 Crmp3 Ulip4	564	25	27.5193	0.039225	27.6151	0.031446	1.06866	0.0227737	>0.05	24	27.4533	0.152849	27.52	0.108735	1.0473	0.073811	>0.05
Q62952	DPYL3_RAT	Dihydropyrimidinase-related protein 3 (DRP-3) (Collapsin response mediator protein 4) (CRMP-4) (TOAD-64/Ulip/CRMP) (TUC-4b)	Dpysl3 Crmp4	570	26	29.9775	0.019282	30.0297	0.0329053	1.03687	0.023136	>0.05	27	28.9818	0.0431577	28.9481	0.0419752	0.976936	0.0288832	>0.05
Q62976	KCMA1_RAT	Calcium-activated potassium channel subunit alpha-1 (BK channel) (BKCA alpha) (Calcium-activated potassium channel, subfamily M subunit alpha-1) (K(VCA)alpha) (KCa1.1) (Maxi K channel) (MaxiK) (Slo-alpha) (Slo1) (Slowpoke homolog) (Slo homolog)	Kcnma1 Kcnma	1209	4	24.5288	0.156089	24.4128	0.127348	0.922746	0.080926	>0.05
Q63011	Q63011_RAT	Zero beta-globin (Fragment)	0	146									10	29.9713	0.0835698	29.4311	0.103922	0.687681	0.0384089	<0.001
Q63016	LAT1_RAT	Large neutral amino acids transporter small subunit 1 (4F2 light chain) (4F2 LC) (4F2LC) (Integral membrane protein E16) (Protein TA1) (L-type amino acid transporter 1) (Solute carrier family 7 member 5)	Slc7a5 Mpe16 Ta1	512	2	23.0034	0.0936118	22.6806	0.235489	0.79951	0.119743	>0.05
Q63028	ADDA_RAT	Alpha-adducin (Erythrocyte adducin subunit alpha)	Add1	735	22	28.2382	0.0380583	28.2248	0.0280277	0.990772	0.0193324	>0.05	21	27.2365	0.0292899	27.2164	0.026491	0.986167	0.0183727	>0.05
Q63041	A1M_RAT	Alpha-1-macroglobulin (Alpha-1-M) (Alpha-1-macroglobulin 165 kDa subunit) [Cleaved into: Alpha-1-macroglobulin 45 kDa subunit]	A1m Pzp	1500	11	24.3403	0.150652	24.3145	0.104119	0.982288	0.0770235	>0.05	8	21.6062	0.177125	21.7343	0.133508	1.09289	0.103772	>0.05
Q63060	GLPK_RAT	Glycerol kinase (GK) (Glycerokinase) (EC 2.7.1.30) (ATP-stimulated glucocorticoid-receptor translocation promoter) (ASTP) (ATP:glycerol 3-phosphotransferase)	Gk Gyk	524	3	22.7705	0.0810847	22.8395	0.0802966	1.04899	0.0583411	>0.05
Q63081	PDIA6_RAT	Protein disulfide-isomerase A6 (EC 5.3.4.1) (Calcium-binding protein 1) (CaBP1) (Protein disulfide isomerase P5) (Thioredoxin domain-containing protein 7)	Pdia6 Cabp1 Txndc7	440	6	25.0337	0.088803	25.0652	0.114305	1.02204	0.0828457	>0.05	8	23.8881	0.088468	23.7962	0.0396582	0.938309	0.0249226	>0.05
Q63092	CAMKV_RAT	CaM kinase-like vesicle-associated protein (1G5)	Camkv 1G5	504	20	28.7322	0.0644404	28.8138	0.0284665	1.05816	0.0209259	>0.05	16	27.5424	0.0215792	27.611	0.0640566	1.04864	0.0426646	>0.05
Q63100	DC1I1_RAT	Cytoplasmic dynein 1 intermediate chain 1 (Cytoplasmic dynein intermediate chain 1) (Dynein intermediate chain 1, cytosolic) (DH IC-1)	Dync1i1 Dnci1 Dncic1	643	5	23.5616	0.0728952	23.4784	0.041405	0.94396	0.0272557	>0.05	5	22.4235	0.0699547	22.4386	0.100257	1.01057	0.0708857	>0.05
Q63151	ACSL3_RAT	Long-chain-fatty-acid--CoA ligase 3 (EC 6.2.1.3) (Brain acyl-CoA synthetase II) (Long-chain acyl-CoA synthetase 3) (LACS 3)	Acsl3 Acs3 Facl3	720									2	20.7351	0.0769191	20.8125	0.0755893	1.0551	0.0565858	>0.05
Q63198	CNTN1_RAT	Contactin-1 (Neural cell surface protein F3)	Cntn1	1021	34	29.4158	0.0327824	29.4284	0.0305068	1.00879	0.0215577	>0.05	34	28.2039	0.0465795	28.1677	0.0464992	0.975246	0.0315315	>0.05
Q63228	GMFB_RAT	Glia maturation factor beta (GMF-beta)	Gmfb	142	4	25.4562	0.0584076	25.5886	0.0440445	1.09612	0.0334761	>0.05	4	24.5117	0.079617	24.5588	0.0777222	1.03323	0.057416	>0.05
Q63345	MOG_RAT	Myelin-oligodendrocyte glycoprotein	Mog	245									8	27.5864	0.113741	27.5102	0.0743637	0.948558	0.0502442	>0.05
Q63357	MYO1D_RAT	Unconventional myosin-Id (Myosin heavy chain myr 4)	Myo1d Myr4	1006	4	21.7572	0.180794	21.6151	0.216893	0.906243	0.196216	>0.05	6	22.8737	0.110899	22.8223	0.140602	0.965062	0.115156	>0.05
Q63362	NDUA5_RAT	NADH dehydrogenase [ubiquinone] 1 alpha subcomplex subunit 5 (Complex I subunit B13) (Complex I-13kD-B) (CI-13kD-B) (NADH-ubiquinone oxidoreductase 13 kDa-B subunit)	Ndufa5	116	6	26.3594	0.0409942	26.4136	0.0407434	1.03831	0.0293129	>0.05	6	25.0911	0.0548612	25.1572	0.0577241	1.04692	0.0413354	>0.05
Q63372	NRX1A_RAT	Neurexin-1 (Neurexin I-alpha) (Neurexin-1-alpha)	Nrxn1	1530	2	22.0378	0.082435	22.0636	0.0198879	1.01801	0.0139303	>0.05
Q63377	AT1B3_RAT	Sodium/potassium-transporting ATPase subunit beta-3 (Sodium/potassium-dependent ATPase subunit beta-3) (ATPB-3) (CD antigen CD298)	Atp1b3	279	6	25.5435	0.10724	25.5631	0.0760237	1.01368	0.0547182	>0.05	3	23.3702	0.073115	23.395	0.045093	1.01732	0.0323936	>0.05
Q63413	DX39B_RAT	Spliceosome RNA helicase Ddx39b (EC 3.6.4.13) (56 kDa U2AF65-associated protein) (ATP-dependent RNA helicase p47) (DEAD box protein Uap56)	Ddx39b Bat1 Bat1a Uap56	428	9	24.4641	0.105936	24.6243	0.0966588	1.11742	0.0765417	>0.05	7	21.9744	0.0509731	21.9375	0.0715555	0.974713	0.0475672	>0.05
Q63474	DDR1_RAT	Epithelial discoidin domain-containing receptor 1 (Epithelial discoidin domain receptor 1) (EC 2.7.10.1) (CD167 antigen-like family member A) (Cell adhesion kinase) (Discoidin receptor tyrosine kinase) (Protein-tyrosine kinase 3) (Tyrosine kinase DDR) (Tyrosine-protein kinase CAK) (CD antigen CD167a)	Ddr1 Eddr1 Ptk3	910	4	21.0195	0.354114	21.1275	0.325134	1.07772	0.253607	>0.05
Q63475	PTPR2_RAT	Receptor-type tyrosine-protein phosphatase N2 (R-PTP-N2) (EC 3.1.3.48) (PTP NE-6) (PTPNE6) (Phogrin)	Ptprn2	1004	3	24.8852	0.319074	24.9502	0.220228	1.04608	0.18052	>0.05
Q63505	TF3C1_RAT	General transcription factor 3C polypeptide 1 (TF3C-alpha) (TFIIIC box B-binding subunit) (Transcription factor IIIC 220 kDa subunit) (TFIIIC 220 kDa subunit) (TFIIIC220) (Transcription factor IIIC subunit alpha)	Gtf3c1	2148	2	21.235	0.184094	21.1516	0.175627	0.943878	0.111702	>0.05
Q63525	NUDC_RAT	Nuclear migration protein nudC (Nuclear distribution protein C homolog) (c15)	Nudc	332	10	24.4787	0.121126	24.3659	0.103732	0.924757	0.064782	>0.05	7	22.716	0.0521304	22.747	0.0292079	1.02177	0.0206376	>0.05
Q63555	Q63555_RAT	SP120	0	798	11	26.2737	0.0437078	26.3151	0.0587321	1.02911	0.041986	>0.05	12	25.503	0.0396137	25.5495	0.0581597	1.03274	0.0422422	>0.05
Q63560	MAP6_RAT	Microtubule-associated protein 6 (MAP-6) (145-kDa STOP) (STOP145) (Stable tubule-only polypeptide) (STOP)	Map6 Mtap6	952	40	29.9321	0.0370901	29.8638	0.0389446	0.953744	0.0275339	>0.05	44	28.7913	0.0367992	28.7346	0.0258651	0.961506	0.0171127	>0.05
Q63564	SV2B_RAT	Synaptic vesicle glycoprotein 2B (Synaptic vesicle protein 2B)	Sv2b Sv2bb	683	10	26.8158	0.0828276	26.8092	0.0958866	0.99542	0.0665835	>0.05	11	24.7717	0.0732607	24.2734	0.079712	0.707969	0.0408097	<0.05
Q63569	PRS6A_RAT	26S protease regulatory subunit 6A (26S proteasome AAA-ATPase subunit RPT5) (Proteasome 26S subunit ATPase 3) (Spermatogenic cell/sperm-associated Tat-binding protein homolog SATA) (Tat-binding protein 1) (TBP-1)	Psmc3 Tbp1	439									6	22.2088	0.0401622	22.2537	0.0365804	1.03157	0.0263532	>0.05
Q63570	PRS6B_RAT	26S protease regulatory subunit 6B (26S proteasome AAA-ATPase subunit RPT3) (Proteasome 26S subunit ATPase 4) (S6 ATPase) (Tat-binding protein 7) (TBP-7)	Psmc4 Tbp7	418	4	22.5405	0.058867	22.5324	0.054139	0.994359	0.0366038	>0.05
Q63584	TMEDA_RAT	Transmembrane emp24 domain-containing protein 10 (21 kDa transmembrane-trafficking protein) (Transmembrane protein Tmp21) (p24 family protein delta-1) (p24delta1)	Tmed10 Tmp21	219	2	21.4563	0.0776318	21.3836	0.0902481	0.95087	0.0614768	>0.05
Q63598	PLST_RAT	Plastin-3 (T-plastin)	Pls3	630	7	22.1108	0.142991	21.9177	0.0787992	0.874689	0.0522886	>0.05	5	20.9355	0.0931395	20.7917	0.0800239	0.905161	0.0522211	>0.05
Q63604	NTRK2_RAT	BDNF/NT-3 growth factors receptor (EC 2.7.10.1) (Neurotrophic tyrosine kinase receptor type 2) (TrkB tyrosine kinase) (Trk-B)	Ntrk2 Trkb	821	3	22.4385	0.189531	22.1559	0.148563	0.82208	0.077345	>0.05	2	21.5953	0.118277	21.9638	0.0677211	1.29099	0.0422289	<0.05
Q63610	TPM3_RAT	Tropomyosin alpha-3 chain (Gamma-tropomyosin) (Tropomyosin-3) (Tropomyosin-5)	Tpm3 Tpm-5 Tpm5	248	14	28.0299	0.0480069	27.9989	0.0393474	0.978738	0.026501	>0.05	16	27.0947	0.065837	27.0294	0.0345413	0.955729	0.0235315	>0.05
Q63617	HYOU1_RAT	Hypoxia up-regulated protein 1 (150 kDa oxygen-regulated protein) (ORP-150)	Hyou1 Orp150	999									11	22.8206	0.0352619	22.8637	0.0371117	1.03037	0.0256847	>0.05
Q63622	DLG2_RAT	Disks large homolog 2 (Channel-associated protein of synapse-110) (Chapsyn-110) (Postsynaptic density protein PSD-93)	Dlg2 Dlgh2	852	17	27.1372	0.0638085	27.1368	0.0336717	0.999765	0.0226027	>0.05	17	25.8167	0.0269201	25.8448	0.0339435	1.0197	0.0244005	>0.05
Q63633	S12A5_RAT	Solute carrier family 12 member 5 (Electroneutral potassium-chloride cotransporter 2) (Furosemide-sensitive K-Cl cotransporter) (K-Cl cotransporter 2) (rKCC2) (Neuronal K-Cl cotransporter)	Slc12a5 Kcc2	1139	18	26.8791	0.0799773	26.9079	0.086125	1.02015	0.0627747	>0.05	13	25.4511	0.0660506	25.4	0.03561	0.965198	0.0243178	>0.05
Q63692	CDC37_RAT	Hsp90 co-chaperone Cdc37 (Hsp90 chaperone protein kinase-targeting subunit) (p50Cdc37) [Cleaved into: Hsp90 co-chaperone Cdc37, N-terminally processed]	Cdc37	379	5	25.0181	0.161136	25.217	0.127604	1.1478	0.10036	>0.05	6	23.9929	0.0839583	24.0101	0.0752913	1.01201	0.0553179	>0.05
Q63716	PRDX1_RAT	Peroxiredoxin-1 (EC 1.11.1.15) (HBP23) (Heme-binding 23 kDa protein) (Thioredoxin peroxidase 2) (Thioredoxin-dependent peroxide reductase 2)	Prdx1 Tdpx2	199	13	28.539	0.0461291	28.4878	0.0514406	0.965162	0.0375405	>0.05	12	27.282	0.0574827	27.1637	0.0353988	0.921263	0.022244	>0.05
Q63754	SYUB_RAT	Beta-synuclein (Phosphoneuroprotein 14) (PNP 14)	Sncb	137	6	28.9926	0.122203	29.0399	0.0362294	1.03331	0.0267675	>0.05	7	28.0454	0.0814154	27.9775	0.0945487	0.954	0.0629407	>0.05
Q63768	CRK_RAT	Adapter molecule crk (Proto-oncogene c-Crk) (p38)	Crk Crko	304	6	24.6715	0.0380865	24.6969	0.0621804	1.01778	0.0440465	>0.05	5	22.9627	0.0390089	22.9984	0.0469369	1.02508	0.03353	>0.05
Q63797	PSME1_RAT	Proteasome activator complex subunit 1 (11S regulator complex subunit alpha) (REG-alpha) (Activator of multicatalytic protease subunit 1) (Proteasome activator 28 subunit alpha) (PA28a) (PA28alpha)	Psme1	249	4	20.6728	0.203154	20.5383	0.108593	0.910986	0.0722183	>0.05
Q63803	GNAS1_RAT	Guanine nucleotide-binding protein G(s) subunit alpha isoforms XLas (Adenylate cyclase-stimulating G alpha protein) (Extra large alphas protein) (XLalphas) (G-alpha-8)	Gnas Gnas1	1144									6	22.7746	0.0255509	22.7313	0.0632143	0.970493	0.0407913	>0.05
Q63881	KCND2_RAT	Potassium voltage-gated channel subfamily D member 2 (RK5) (Shal1) (Voltage-gated potassium channel subunit Kv4.2)	Kcnd2	630	4	22.1638	0.170823	22.2797	0.0977152	1.08369	0.0707956	>0.05
Q63910	Q63910_RAT	Alpha globin (Protein LOC287167) (RCG33691)	LOC287167 GloA rCG_33691	142	6	28.4052	0.167757	28.8467	0.0994028	1.358	0.0495171	<0.01	6	27.809	0.099566	27.2464	0.134124	0.677106	0.0275386	<0.001
Q63941	RAB3B_RAT	Ras-related protein Rab-3B	Rab3b	219	6	23.2243	0.210311	23	0.211743	0.856044	0.124197	>0.05	6	20.4182	0.0638668	20.2924	0.0743404	0.916504	0.0453653	>0.05
Q64057	AL7A1_RAT	Alpha-aminoadipic semialdehyde dehydrogenase (Alpha-AASA dehydrogenase) (EC 1.2.1.31) (Aldehyde dehydrogenase family 7 member A1) (EC 1.2.1.3) (Antiquitin-1) (Betaine aldehyde dehydrogenase) (EC 1.2.1.8) (Delta1-piperideine-6-carboxylate dehydrogenase) (P6c dehydrogenase)	Aldh7a1 Ald7a1	539	7	24.0883	0.0590628	24.1587	0.0794047	1.05001	0.0625989	>0.05	7	22.3638	0.0922466	22.3953	0.117443	1.02209	0.0876147	>0.05
Q64119	MYL6_RAT	Myosin light polypeptide 6 (17 kDa myosin light chain) (LC17) (Myosin light chain 3) (MLC-3) (Myosin light chain alkali 3) (Myosin light chain A3) (Smooth muscle and nonmuscle myosin light chain alkali 6)	Myl6	151	8	27.0054	0.0292488	27.0023	0.0265134	0.997905	0.0185872	>0.05	7	25.7767	0.0606285	25.7472	0.0630498	0.979762	0.0417011	>0.05
Q641Y2	NDUS2_RAT	NADH dehydrogenase [ubiquinone] iron-sulfur protein 2, mitochondrial (EC 1.6.5.3) (EC 1.6.99.3) (Complex I-49kD) (CI-49kD) (NADH-ubiquinone oxidoreductase 49 kDa subunit)	Ndufs2	463	12	27.3437	0.0379565	27.7376	0.0313607	1.31397	0.0220631	<0.001	11	26.7527	0.0628684	26.8473	0.0582819	1.06777	0.0430282	>0.05
Q641Y8	DDX1_RAT	ATP-dependent RNA helicase DDX1 (EC 3.6.4.13) (DEAD box protein 1)	Ddx1	740	11	24.3477	0.0749957	24.384	0.0415288	1.02546	0.0300431	>0.05	7	22.1299	0.0824777	22.0424	0.0813952	0.941191	0.0547038	>0.05
Q641Z6	EHD1_RAT	EH domain-containing protein 1	Ehd1	534	7	25.7685	0.0338196	25.8576	0.0451655	1.06366	0.0345367	>0.05	7	23.7479	0.0545882	23.8143	0.0666895	1.04716	0.0496879	>0.05
Q64232	TECR_RAT	Very-long-chain enoyl-CoA reductase (EC 1.3.1.93) (Synaptic glycoprotein SC2) (Trans-2,3-enoyl-CoA reductase) (TER)	Tecr Gpsn2	308	2	21.354	0.0885692	21.1344	0.0824148	0.858783	0.0497981	>0.05	2	21.0197	0.0485841	20.8616	0.0604207	0.896223	0.0388548	>0.05
Q64361	LXN_RAT	Latexin (Endogenous carboxypeptidase inhibitor) (ECI) (Tissue carboxypeptidase inhibitor) (TCI)	Lxn	223	2	22.6733	0.179599	22.3793	0.160874	0.815648	0.136559	>0.05	3	21.5742	0.219233	21.3129	0.101514	0.834334	0.0531288	>0.05
Q64428	ECHA_RAT	Trifunctional enzyme subunit alpha, mitochondrial (TP-alpha) [Includes: Long-chain enoyl-CoA hydratase (EC 4.2.1.17); Long chain 3-hydroxyacyl-CoA dehydrogenase (EC 1.1.1.211)]	Hadha	763	13	25.8183	0.0552002	25.7807	0.0717013	0.974273	0.0578103	>0.05	13	24.2637	0.0580256	24.3086	0.0480346	1.03165	0.033361	>0.05
Q64536	PDK2_RAT	[Pyruvate dehydrogenase (acetyl-transferring)] kinase isozyme 2, mitochondrial (EC 2.7.11.2) (PDK P45) (Pyruvate dehydrogenase kinase isoform 2) (PDH kinase 2)	Pdk2	407									3	20.6202	0.0545135	20.7117	0.0506716	1.06544	0.0377682	>0.05
Q64537	CPNS1_RAT	Calpain small subunit 1 (CSS1) (Calcium-activated neutral proteinase small subunit) (CANP small subunit) (Calcium-dependent protease small subunit) (CDPS) (Calcium-dependent protease small subunit 1) (Calpain regulatory subunit)	Capns1 Capn4 Css1	270	4	22.6465	0.123553	22.4689	0.0538676	0.884149	0.0349591	>0.05	3	21.7607	0.0582697	21.6888	0.0462756	0.951398	0.0309073	>0.05
Q64548	RTN1_RAT	Reticulon-1 (Neuroendocrine-specific protein) (S-rex)	Rtn1 Nsp	777	23	28.6677	0.0360306	28.335	0.0284088	0.794029	0.0215225	<0.05	23	27.2213	0.0345832	27.2673	0.0176246	1.03242	0.0126151	>0.05
Q64559	BACH_RAT	Cytosolic acyl coenzyme A thioester hydrolase (EC 3.1.2.2) (ACH1) (ACT) (Acyl-CoA thioesterase 7) (Brain acyl-CoA hydrolase) (BACH) (CTE-IIa) (CTE-IIb) (CTE-II) (LACH1) (Long chain acyl-CoA thioester hydrolase) (MTE-II)	Acot7 Bach	381	7	26.1946	0.0568061	26.2449	0.0585843	1.03545	0.0420944	>0.05	6	24.7988	0.0663623	24.7928	0.0582082	0.995842	0.0437996	>0.05
Q64560	TPP2_RAT	Tripeptidyl-peptidase 2 (TPP-2) (EC 3.4.14.10) (Tripeptidyl aminopeptidase) (Tripeptidyl-peptidase II) (TPP-II)	Tpp2	1249	8	23.2773	0.0528157	23.3081	0.0586892	1.02157	0.0422379	>0.05	9	21.9448	0.147556	21.6636	0.109572	0.822918	0.0686041	>0.05
Q64568	AT2B3_RAT	Plasma membrane calcium-transporting ATPase 3 (PMCA3) (EC 3.6.3.8) (Plasma membrane calcium ATPase isoform 3) (Plasma membrane calcium pump isoform 3)	Atp2b3 Pmca3	1258	19	28.6686	0.0414654	28.4893	0.0627504	0.883137	0.0384752	<0.05	19	27.9523	0.0845235	27.9608	0.102628	1.00588	0.0700926	>0.05
Q64605	PTPRS_RAT	Receptor-type tyrosine-protein phosphatase S (R-PTP-S) (EC 3.1.3.48) (Leukocyte common antigen-related protein-tyrosine phosphatase 2) (LAR-PTP2) (Receptor-type tyrosine-protein phosphatase sigma) (R-PTP-sigma)	Ptprs	1907	8	23.8034	0.102869	23.8232	0.0916088	1.01379	0.0638476	>0.05
Q64640	ADK_RAT	Adenosine kinase (AK) (EC 2.7.1.20) (Adenosine 5'-phosphotransferase)	Adk	361	4	24.6907	0.259932	24.683	0.239765	0.994662	0.17179	>0.05
Q64715	Q64715_RAT	Microtubule-associated protein	Map2 Mtap2	1825	76	30.3768	0.107119	30.3582	0.1437	0.987154	0.125316	>0.05
Q65ZS7	Q65ZS7_RAT	Rat apolipoprotein E protein	0	336									8	25.9488	0.0527282	25.9885	0.04928	1.02785	0.0344497	>0.05
Q66H09	Q66H09_RAT	Protein Ttc1 (Tetratricopeptide repeat domain 1)	Ttc1 rCG_32719	292	2	21.1747	0.0417022	21.1167	0.0687527	0.960599	0.0468843	>0.05
Q66H20	PTBP2_RAT	Polypyrimidine tract-binding protein 2 (Neural polypyrimidine tract-binding protein) (PTB-like protein)	Ptbp2 Nptb Ptblp	531	3	22.6363	0.0917786	22.7705	0.0784026	1.09753	0.0597082	>0.05	2	21.4657	0.0603816	21.5253	0.054779	1.04219	0.0421753	>0.05
Q66H38	FA71B_RAT	Protein FAM71B	Fam71b	647	2	26.8146	0.188739	26.8833	0.120742	1.04884	0.0792718	>0.05
Q66H62	CYLD_RAT	Ubiquitin carboxyl-terminal hydrolase CYLD (EC 3.4.19.12) (Deubiquitinating enzyme CYLD) (Ubiquitin thioesterase CYLD) (Ubiquitin-specific-processing protease CYLD)	Cyld Cyld1	953	5	22.7931	0.106969	23.2228	0.128841	1.34695	0.0311239	<0.001
Q66HA6	ARL8B_RAT	ADP-ribosylation factor-like protein 8B	Arl8b	186	3	25.6306	0.0899651	25.6523	0.121233	1.01516	0.083948	>0.05
Q66HA8	HS105_RAT	Heat shock protein 105 kDa (Heat shock 110 kDa protein)	Hsph1 Hsp105 Hsp110	858	26	27.7348	0.0447228	28.0845	0.0543503	1.27422	0.0385485	<0.001	26	26.4727	0.0460076	26.5769	0.0503695	1.07491	0.0380027	>0.05
Q66HD0	ENPL_RAT	Endoplasmin (94 kDa glucose-regulated protein) (GRP-94) (Heat shock protein 90 kDa beta member 1)	Hsp90b1 Grp94 Tra1	804	21	26.5067	0.0801048	26.529	0.0882149	1.01562	0.0608629	>0.05	17	25.7542	0.0381627	25.8247	0.0381592	1.05008	0.0275075	>0.05
Q66HF1	NDUS1_RAT	NADH-ubiquinone oxidoreductase 75 kDa subunit, mitochondrial (EC 1.6.5.3) (EC 1.6.99.3)	Ndufs1	727	29	29.3594	0.0633058	29.3457	0.0533872	0.990546	0.0362886	>0.05	32	28.173	0.0260613	28.2474	0.0258338	1.05294	0.019194	>0.05
Q66HF8	AL1B1_RAT	Aldehyde dehydrogenase X, mitochondrial (EC 1.2.1.3) (Aldehyde dehydrogenase family 1 member B1)	Aldh1b1 Aldhx	519	10	25.275	0.109513	25.6528	0.104707	1.29936	0.0423737	<0.001	8	23.8577	0.0863794	24.0925	0.0397748	1.17671	0.0326761	<0.05
Q66HL2	SRC8_RAT	Src substrate cortactin	Cttn	509	9	25.2694	0.0302856	25.1889	0.0489343	0.945743	0.0318908	>0.05	7	23.7218	0.056691	23.6846	0.0343771	0.974512	0.0240515	>0.05
Q66HM2	Q66HM2_RAT	AP-2 complex subunit alpha-2 (Adaptor-related protein complex 2, alpha 2 subunit)	Ap2a2	939	39	29.4782	0.0242063	29.5413	0.0345264	1.04473	0.026191	>0.05
Q66HR2	MARE1_RAT	Microtubule-associated protein RP/EB family member 1 (APC-binding protein EB1) (End-binding protein 1) (EB1)	Mapre1	268	6	24.2351	0.0780618	24.2631	0.0834061	1.01959	0.061384	>0.05	6	24.3006	0.0287528	24.2856	0.0407962	0.989673	0.028083	>0.05
Q66X93	SND1_RAT	Staphylococcal nuclease domain-containing protein 1 (100 kDa coactivator) (SND p102) (p100 co-activator) (p105 coactivator)	Snd1	909	3	21.8942	0.0474658	21.9494	0.0555509	1.03901	0.0428558	>0.05	3	21.1094	0.0832191	20.9784	0.0954925	0.913189	0.0619382	>0.05
Q68A21	PURB_RAT	Transcriptional activator protein Pur-beta (Purine-rich element-binding protein B)	Purb	315	7	26.0969	0.0616963	26.1284	0.0541039	1.02205	0.0386735	>0.05	6	24.6162	0.0800125	24.662	0.0337507	1.03222	0.0234146	>0.05
Q68FP1	GELS_RAT	Gelsolin (Actin-depolymerizing factor) (ADF) (Brevin)	Gsn	780	12	25.2571	0.0767997	25.0918	0.0762144	0.891773	0.0495482	>0.05	11	24.4223	0.134869	24.4792	0.0775046	1.04023	0.0558012	>0.05
Q68FQ0	TCPE_RAT	T-complex protein 1 subunit epsilon (TCP-1-epsilon) (CCT-epsilon)	Cct5	541	18	26.308	0.0311885	26.2769	0.0322712	0.97865	0.0225116	>0.05	16	24.7445	0.0392421	24.7766	0.0348485	1.02245	0.0246584	>0.05
Q68FQ9	Q68FQ9_RAT	LanC lantibiotic synthetase component C-like 2 (Bacterial) (Protein Lancl2)	Lancl2	450	11	26.2784	0.0580758	26.2145	0.0614681	0.956666	0.0410395	>0.05	9	24.2651	0.0583046	24.2647	0.052227	0.999668	0.0360486	>0.05
Q68FR6	EF1G_RAT	Elongation factor 1-gamma (EF-1-gamma) (eEF-1B gamma)	Eef1g	437	11	25.6727	0.0517332	25.6106	0.060508	0.957897	0.044116	>0.05	10	24.7723	0.0518173	24.7126	0.0381588	0.959466	0.0251692	>0.05
Q68FR9	EF1D_RAT	Elongation factor 1-delta (EF-1-delta)	Eef1d	281	5	23.3821	0.0696915	23.4016	0.122525	1.01355	0.104936	>0.05	5	22.4941	0.0463778	22.4821	0.0495128	0.991712	0.0335427	>0.05
Q68FS2	CSN4_RAT	COP9 signalosome complex subunit 4 (SGN4) (Signalosome subunit 4) (JAB1-containing signalosome subunit 4)	Cops4 Csn4	406	3	22.802	0.090706	22.8463	0.0837824	1.0312	0.0579924	>0.05	7	24.2872	0.281548	24.6557	0.178538	1.29099	0.159135	>0.05
Q68FS3	FBX7_RAT	F-box only protein 7	Fbxo7	522									2	20.5187	0.0647385	20.4872	0.0502322	0.9784	0.0329171	>0.05
Q68FS4	AMPL_RAT	Cytosol aminopeptidase (EC 3.4.11.1) (Leucine aminopeptidase 3) (LAP-3) (Leucyl aminopeptidase) (Proline aminopeptidase) (EC 3.4.11.5) (Prolyl aminopeptidase)	Lap3	519	17	25.739	0.0444224	25.7273	0.0650541	0.991914	0.0453603	>0.05	12	24.2794	0.0681649	24.2296	0.0553038	0.966041	0.0356213	>0.05
Q68FU2	Q68FU2_RAT	Phosphoserine aminotransferase (EC 2.6.1.52)	Psat1	370	12	26.3939	0.0505754	26.3195	0.0705778	0.949747	0.0521357	>0.05	13	25.1622	0.077181	24.9986	0.0343305	0.892799	0.0225127	>0.05
Q68FU3	ETFB_RAT	Electron transfer flavoprotein subunit beta (Beta-ETF)	Etfb	255	7	23.7834	0.0993529	23.778	0.124881	0.996286	0.0845745	>0.05	6	22.8135	0.0577859	22.769	0.081229	0.969636	0.0570148	>0.05
Q68FW9	CSN3_RAT	COP9 signalosome complex subunit 3 (SGN3) (Signalosome subunit 3)	Cops3 Csn3	423	4	22.269	0.101845	22.0699	0.137652	0.871146	0.0844268	>0.05	3	21.1603	0.127713	21.2222	0.137408	1.04382	0.104659	>0.05
Q68FX0	IDH3B_RAT	Isocitrate dehydrogenase [NAD] subunit beta, mitochondrial (EC 1.1.1.41) (Isocitric dehydrogenase subunit beta) (NAD(+)-specific ICDH subunit beta)	Idh3B	385	20	28.5949	0.0478232	29.0236	0.035639	1.34601	0.026323	<0.001	19	27.242	0.0165894	27.3144	0.0296473	1.05147	0.0222815	<0.05
Q68FX1	MPI_RAT	Mannose-6-phosphate isomerase (EC 5.3.1.8) (Phosphohexomutase) (Phosphomannose isomerase) (PMI)	Mpi	423	5	25.663	0.24338	25.8947	0.283917	1.17417	0.253769	>0.05	5	22.0622	0.0818644	22.0389	0.0391157	0.98397	0.0271137	>0.05
Q68FX9	SIR5_RAT	NAD-dependent protein deacylase sirtuin-5, mitochondrial (EC 3.5.1.-) (Regulatory protein SIR2 homolog 5) (SIR2-like protein 5)	Sirt5	310	6	24.0462	0.091251	24.039	0.0858004	0.995044	0.056427	>0.05	7	22.7136	0.0833857	22.6737	0.0853397	0.972746	0.0664102	>0.05
Q68FY0	QCR1_RAT	Cytochrome b-c1 complex subunit 1, mitochondrial (Complex III subunit 1) (Core protein I) (Ubiquinol-cytochrome-c reductase complex core protein 1)	Uqcrc1	480	18	29.7859	0.0256565	29.8088	0.0298515	1.01601	0.0205816	>0.05	16	28.039	0.0296368	28.0936	0.0253274	1.03859	0.0179798	>0.05
Q68FZ8	Q68FZ8_RAT	Propionyl coenzyme A carboxylase, beta polypeptide (Propionyl coenzyme A carboxylase, beta polypeptide, isoform CRA_b) (Propionyl-CoA carboxylase beta chain, mitochondrial)	Pccb rCG_25130	541	4	22.8363	0.0805493	22.729	0.0526727	0.92832	0.0357684	>0.05	4	20.9322	0.08916	21.105	0.106804	1.1272	0.0860053	>0.05
Q68G16	Q68G16_RAT	Serine/threonine-protein phosphatase (EC 3.1.3.16)	Ppp5c	499	5	23.7811	0.0536684	24.1957	0.0508378	1.33295	0.0339649	<0.001	5	22.1669	0.0704263	22.0817	0.0390648	0.942623	0.0258779	>0.05
Q6AXR6	Q6AXR6_RAT	Glutathione S-transferase omega 1 (Glutathione S-transferase omega 1, isoform CRA_b) (Glutathione S-transferase omega-1)	Gsto1 rCG_57583	241									7	25.7603	0.0484351	25.8094	0.0408288	1.03458	0.0293705	>0.05
Q6AXT5	RAB21_RAT	Ras-related protein Rab-21	Rab21	223	3	23.2459	0.0706707	23.4104	0.0872732	1.12081	0.0693126	>0.05	3	21.3001	0.0739387	21.2526	0.051372	0.967576	0.0345609	>0.05
Q6AXU6	HN1_RAT	Hematological and neurological expressed 1 protein [Cleaved into: Hematological and neurological expressed 1 protein, N-terminally processed]	Hn1	149	4	23.2081	0.175702	23.2166	0.178369	1.00589	0.136682	>0.05	4	22.0123	0.0796482	21.955	0.0693726	0.961079	0.0479384	>0.05
Q6AXV4	SAM50_RAT	Sorting and assembly machinery component 50 homolog	Samm50	469	10	27.1316	0.103178	27.0156	0.110977	0.922762	0.0692094	>0.05	7	22.9062	0.0405885	22.9902	0.0420185	1.0599	0.0305485	>0.05
Q6AXX6	F213A_RAT	Redox-regulatory protein FAM213A (Peroxiredoxin-like 2 activated in M-CSF stimulated monocytes) (Protein PAMM) (Sperm head protein 1)	Fam213a Pamm Shp1	229	4	23.4033	0.122457	23.336	0.157065	0.954468	0.105983	>0.05	3	22.2624	0.0626452	22.1787	0.047917	0.943685	0.0305889	>0.05
Q6AY09	HNRH2_RAT	Heterogeneous nuclear ribonucleoprotein H2 (hnRNP H2) (Heterogeneous nuclear ribonucleoprotein H') (hnRNP H') [Cleaved into: Heterogeneous nuclear ribonucleoprotein H2, N-terminally processed]	Hnrnph2 Hnrph2	449	5	26.2422	0.0465044	26.2224	0.0554751	0.986359	0.0393914	>0.05	5	25.0471	0.040333	25.0937	0.0374091	1.03285	0.0265966	>0.05
Q6AY18	Q6AY18_RAT	Protein Sar1a (SAR1 gene homolog A (S. cerevisiae), isoform CRA_b) (SAR1 homolog A (S. cerevisiae))	Sar1a rCG_22123	198									2	22.1258	0.0263561	22.1279	0.0721438	1.00147	0.0454707	>0.05
Q6AY21	Q6AY21_RAT	GTPase activating protein (SH3 domain) binding protein 2 (Protein G3bp2) (Similar to RNA-binding protein isoform G3BP-2a, isoform CRA_b)	G3bp2 RGD1309571 rCG_60442	449	3	23.5869	0.0735677	23.4487	0.0940541	0.90864	0.0627601	>0.05	3	22.1824	0.118051	22.0065	0.0893039	0.885191	0.0499034	>0.05
Q6AY30	SCPDL_RAT	Saccharopine dehydrogenase-like oxidoreductase (EC 1.-.-.-)	Sccpdh	429	12	26.3843	0.098024	26.4571	0.0901236	1.05182	0.0667758	>0.05	12	25.1463	0.0998158	25.271	0.0454759	1.09028	0.03596	>0.05
Q6AY41	CC50A_RAT	Cell cycle control protein 50A (P4-ATPase flippase complex beta subunit TMEM30A) (Transmembrane protein 30A)	Tmem30a Cdc50a	328	2	22.8973	0.153922	23.0596	0.160274	1.11904	0.118352	>0.05	3	20.3546	0.0895321	20.5483	0.0312646	1.14364	0.0250157	>0.05
Q6AY84	SCRN1_RAT	Secernin-1	Scrn1	414	10	26.3195	0.0338997	26.2936	0.043873	0.982233	0.0296936	>0.05	10	25.7049	0.0372101	25.6208	0.0330415	0.943402	0.0217072	>0.05
Q6AY99	Q6AY99_RAT	Aldo-keto reductase family 1, member B10 (Aldose reductase) (Protein Akr1b10) (RCG27939, isoform CRA_b)	Akr1b10 rCG_27939	316	3	24.4286	0.0748119	24.4438	0.0678371	1.01056	0.0513551	>0.05	4	23.5501	0.126467	23.336	0.124508	0.862041	0.0739525	>0.05
Q6AYD3	PA2G4_RAT	Proliferation-associated protein 2G4	Pa2g4	394	3	23.2299	0.0626746	23.0901	0.0874246	0.907629	0.0560411	>0.05	4	21.7246	0.0672514	21.6711	0.0516214	0.963602	0.0344317	>0.05
Q6AYD9	NUD19_RAT	Nucleoside diphosphate-linked moiety X motif 19, mitochondrial (Nudix motif 19) (EC 3.6.1.-)	Nudt19	357									2	22.5312	0.106688	22.4545	0.0750703	0.948175	0.0475767	>0.05
Q6AYG5	ECHD1_RAT	Ethylmalonyl-CoA decarboxylase (EC 4.1.1.94) (Enoyl-CoA hydratase domain-containing protein 1) (Methylmalonyl-CoA decarboxylase) (MMCD) (EC 4.1.1.41)	Echdc1	299	2	21.6251	0.11732	21.8991	0.143556	1.20918	0.120104	>0.05	2	20.1592	0.125038	20.2838	0.0928429	1.09022	0.0729597	>0.05
Q6AYH5	DCTN2_RAT	Dynactin subunit 2	Dctn2	402	9	26.5957	0.090311	26.6642	0.0710272	1.04863	0.0503727	>0.05	10	25.4892	0.0733611	25.484	0.064138	0.996391	0.046732	>0.05
Q6AYK6	CYBP_RAT	Calcyclin-binding protein (CacyBP)	Cacybp	229	3	22.4728	0.0389235	22.5335	0.0465102	1.043	0.035391	>0.05	3	21.3439	0.0397422	21.3867	0.0544875	1.03011	0.0396688	>0.05
Q6AYN4	PHIPL_RAT	Phytanoyl-CoA hydroxylase-interacting protein-like	Phyhipl	375	8	24.1528	0.0698664	24.0375	0.0688856	0.923187	0.0459376	>0.05	9	23.4834	0.107041	23.4101	0.0732202	0.950473	0.0482825	>0.05
Q6AYP5	Q6AYP5_RAT	Cell adhesion molecule 1 (Protein Cadm1)	Cadm1	476	7	25.8888	0.0922492	25.9199	0.0827689	1.02179	0.0588713	>0.05	6	24.6871	0.0475331	24.7441	0.0410999	1.04032	0.0300967	>0.05
Q6AYQ8	FAHD1_RAT	Acylpyruvase FAHD1, mitochondrial (EC 3.7.1.5) (Fumarylacetoacetate hydrolase domain-containing protein 1)	Fahd1	221									2	19.9335	0.190183	19.9235	0.170271	0.993103	0.112881	>0.05
Q6AYR2	NDRG3_RAT	Protein NDRG3 (N-myc downstream-regulated gene 3 protein)	Ndrg3 Ndr3	375	6	23.4423	0.125727	23.5994	0.0666702	1.11506	0.0563142	>0.05	5	22.0069	0.106021	21.9628	0.0454677	0.96988	0.0314279	>0.05
Q6AYS2	Q6AYS2_RAT	RCG24191 (Sideroflexin 1) (Sideroflexin-1)	Sfxn1 rCG_24191	322	10	26.1771	0.0505555	26.265	0.04924	1.06278	0.0388678	>0.05	9	25.0466	0.06885	25.0645	0.0586892	1.01243	0.0417776	>0.05
Q6AYS7	ACY1A_RAT	Aminoacylase-1A (ACY-1A) (EC 3.5.1.14) (ACY IA) (N-acyl-L-amino-acid amidohydrolase)	Acy1a Acy1	408	6	23.1878	0.0839588	23.1837	0.0512054	0.997152	0.0367003	>0.05	2	20.5337	0.131647	20.4151	0.109511	0.921086	0.0706977	>0.05
Q6AYT3	RTCB_RAT	tRNA-splicing ligase RtcB homolog (EC 6.5.1.3) (p55)	Rtcb	505	5	23.105	0.0968688	22.9328	0.0770952	0.887469	0.0475594	>0.05	7	21.9793	0.0526853	21.9228	0.0343882	0.961586	0.0228022	>0.05
Q6AYU5	Q6AYU5_RAT	Poly(RC) binding protein 2 (Protein Pcbp2)	Pcbp2	365	6	26.4789	0.0575092	26.4158	0.0774169	0.957237	0.054913	>0.05	6	25.2934	0.0557007	25.2585	0.0516222	0.976128	0.0352837	>0.05
Q6AZ26	Q6AZ26_RAT	C-terminal binding protein 1 (C-terminal-binding protein 1)	Ctbp1	391	9	26.611	0.0721965	26.4971	0.0675893	0.924047	0.0432128	>0.05
Q6DGF2	Q6DGF2_RAT	Enthoprotin (Protein Clint1)	Clint1 Enth	472	4	22.3564	0.0853427	22.1425	0.0815548	0.862167	0.0530409	>0.05	4	20.9052	0.0394945	20.9593	0.0392397	1.0382	0.0276224	>0.05
Q6DGG0	PPID_RAT	Peptidyl-prolyl cis-trans isomerase D (PPIase D) (EC 5.2.1.8) (40 kDa peptidyl-prolyl cis-trans isomerase) (Cyclophilin-40) (CYP-40) (Rotamase D)	Ppid	370	15	26.3202	0.128272	26.4875	0.0698089	1.12294	0.0566762	>0.05	8	24.9902	0.0746099	25.0884	0.0535023	1.07044	0.0420597	>0.05
Q6GMN2	BAIP2_RAT	Brain-specific angiogenesis inhibitor 1-associated protein 2 (BAI-associated protein 2) (BAI1-associated protein 2) (Insulin receptor substrate protein of 53 kDa) (IRSp53) (Insulin receptor substrate p53) (Insulin receptor tyrosine kinase substrate protein p53)	Baiap2	535	16	26.9511	0.0445427	26.981	0.0630589	1.02092	0.0395618	>0.05	15	25.5195	0.0390419	25.6476	0.0597482	1.09289	0.0467839	>0.05
Q6GX84	FIGL1_RAT	Fidgetin-like protein 1 (EC 3.6.4.-)	Fignl1 S30	677									3	21.9126	0.231282	22.0712	0.148263	1.11622	0.0948557	>0.05
Q6I7R3	ISOC1_RAT	Isochorismatase domain-containing protein 1 (Down-regulated in nephrectomized rat kidney protein 1) (DR-NR1)	Isoc1	297	2	22.0925	0.185648	22.4269	0.0854637	1.26083	0.0754347	>0.05
Q6IE24	UBP54_RAT	Inactive ubiquitin carboxyl-terminal hydrolase 54 (Inactive ubiquitin-specific peptidase 54)	Usp54	1588	2	23.2658	0.301534	23.8027	0.163305	1.45086	0.176928	>0.05
Q6IFW6	K1C10_RAT	Keratin, type I cytoskeletal 10 (Cytokeratin-10) (CK-10) (Keratin-10) (K10) (Type I keratin Ka10)	Krt10 Ka10	526	5	23.3965	0.453442	23.7539	0.323871	1.28116	0.204351	>0.05	5	21.4698	0.224149	21.2331	0.170591	0.848671	0.116413	>0.05
Q6IG03	K2C73_RAT	Keratin, type II cytoskeletal 73 (Cytokeratin-73) (CK-73) (Keratin-73) (K73) (Type II inner root sheath-specific keratin-K6irs3) (Type-II keratin Kb36)	Krt73 Kb36	553	7	26.118	0.304005	25.9099	0.297955	0.865696	0.163852	>0.05
Q6IMF3	K2C1_RAT	Keratin, type II cytoskeletal 1 (Cytokeratin-1) (CK-1) (Keratin-1) (K1) (Type-II keratin Kb1)	Krt1 Kb1	625	6	25.9646	0.373169	25.6632	0.416724	0.811502	0.195176	>0.05	6	26.6021	0.133418	26.4451	0.108539	0.896899	0.0645301	>0.05
Q6IMZ3	Q6IMZ3_RAT	Annexin	Anxa6 rCG_33456	673	26	28.2403	0.17533	28.1076	0.222002	0.912124	0.139556	>0.05	26	27.0785	0.118738	27.0549	0.123185	0.983775	0.0834795	>0.05
Q6IMZ5	Q6IMZ5_RAT	Tropomodulin 1 (Tropomodulin-1)	Tmod1 rCG_54855	359	7	23.4803	0.0563135	23.5265	0.0439748	1.03257	0.0311122	>0.05	6	22.5505	0.147388	22.627	0.146373	1.05443	0.109847	>0.05
Q6IN22	Q6IN22_RAT	Cathepsin B (RCG52258, isoform CRA_a)	Ctsb rCG_52258	339	7	24.3379	0.0628062	24.2308	0.0494087	0.928471	0.0328375	>0.05
Q6IRF8	Q6IRF8_RAT	ATPase, H+ transporting, lysosomal accessory protein 1 (ATPase, H+ transporting, lysosomal accessory protein 1, isoform CRA_a) (V-type proton ATPase subunit S1)	Atp6ap1 rCG_43807	463	4	22.7448	0.0490979	22.7152	0.0971268	0.979716	0.0695102	>0.05
Q6IRJ7	Q6IRJ7_RAT	Annexin	Anxa7 rCG_41894	463	4	21.9136	0.125334	21.9159	0.0724994	1.00163	0.0483128	>0.05	3	22.2687	0.0619017	22.25	0.0437118	0.987171	0.0328459	>0.05
Q6IRK8	Q6IRK8_RAT	Spna2 protein	Sptan1 Spna2	2452	148	32.1914	0.025074	32.1494	0.0241588	0.971321	0.0162609	>0.05
Q6IRL2	Q6IRL2_RAT	Mitofusin 2 (Mitofusin 2, isoform CRA_a) (Protein LOC100911485)	LOC100911485 Mfn2 rCG_31319	757	3	22.6987	0.0893947	22.6357	0.0443323	0.957252	0.029448	>0.05
Q6J4I0	PPR1B_RAT	Protein phosphatase 1 regulatory subunit 1B (DARPP-32) (Dopamine- and cAMP-regulated neuronal phosphoprotein)	Ppp1r1b	205	9	30.1099	0.198474	30.177	0.163834	1.04762	0.10527	>0.05	9	28.8479	0.165235	29.0828	0.0932955	1.17687	0.0738208	>0.05
Q6JE36	NDRG1_RAT	Protein NDRG1 (N-myc downstream-regulated gene 1 protein) (Protein Ndr1)	Ndrg1 Ndr1	394	6	23.9077	0.151365	23.8893	0.164048	0.987306	0.133832	>0.05	3	22.9098	0.0859444	22.7639	0.0649832	0.903805	0.0404753	>0.05
Q6JP77	AKA7G_RAT	A-kinase anchor protein 7 isoforms delta and gamma (AKAP-7 isoforms delta and gamma) (A-kinase anchor protein 18) (AKAP-18) (Protein kinase A-anchoring protein 7 isoforms delta and gamma) (PRKA7 isoforms delta and gamma)	Akap7 Akap18	353	3	21.4308	0.0940577	21.4478	0.126484	1.01184	0.0848195	>0.05	2	20.4658	0.0965349	20.2202	0.10257	0.84343	0.0643996	>0.05
Q6KC51	ABLM2_RAT	Actin-binding LIM protein 2 (abLIM-2) (Actin-binding LIM protein family member 2)	Ablim2	612	5	23.5433	0.14676	23.535	0.133746	0.994269	0.088659	>0.05	7	23.0971	0.0725736	23.2304	0.0668354	1.09675	0.0483269	>0.05
Q6MFX9	Q6MFX9_RAT	Myelin oligodendrocyte glycoprotein (Myelin oligodendrocyte glycoprotein, isoform CRA_a) (Myelin-oligodendrocyte glycoprotein)	Mog 9430032L10Rik Gabbr1 Olr1735_predicted Olr1736_predicted Olr1737_predicted Olr1738_predicted Olr1739_predicted Olr1742_predicted Olr1743_predicted Olr1744_predicted Olr1745_predicted Olr1746_predicted Olr1748_predicted Olr1749_predicted Olr1750_predicted Rps15-ps RT1-M3 RT1-M3-2 RT1-M6-1 Ubd Zfp57 Znrd1 rCG_58610	245	8	29.1868	0.0784155	29.1573	0.142859	0.979752	0.121799	>0.05
Q6MG06	GNL1_RAT	Guanine nucleotide-binding protein-like 1	Gnl1	607	3	20.9472	0.13147	20.8915	0.0954671	0.962158	0.0613891	>0.05
Q6MG49	BAG6_RAT	Large proline-rich protein BAG6 (BCL2-associated athanogene 6) (HLA-B-associated transcript 3)	Bag6 Bat3	1146	2	23.3633	0.0689877	23.2221	0.0539292	0.906773	0.0345136	>0.05	3	21.4182	0.128635	21.5588	0.0998038	1.10233	0.0714389	>0.05
Q6MG60	DDAH2_RAT	N(G),N(G)-dimethylarginine dimethylaminohydrolase 2 (DDAH-2) (Dimethylarginine dimethylaminohydrolase 2) (EC 3.5.3.18) (DDAHII) (Dimethylargininase-2)	Ddah2	285	6	24.7012	0.0520478	24.6965	0.0506529	0.996751	0.035245	>0.05	6	23.5646	0.0665639	23.627	0.0330141	1.04424	0.0241043	>0.05
Q6MG85	Q6MG85_RAT	1-acyl-sn-glycerol-3-phosphate acyltransferase (EC 2.3.1.51)	Agpat1 Ager Btnl6 Cyp21a1-ps Ng5 Rnf5 Stk19-ps Tnx rCG_38326	284	2	22.6803	0.128913	22.6851	0.184267	1.00337	0.110877	>0.05
Q6NYB7	RAB1A_RAT	Ras-related protein Rab-1A	Rab1A Rab1	205	6	25.3445	0.063214	25.3772	0.0548001	1.02295	0.0398625	>0.05	6	25.7796	0.0500859	25.7931	0.0403484	1.00939	0.0279863	>0.05
Q6P0K8	PLAK_RAT	Junction plakoglobin	Jup	745	3	23.3825	0.0857475	23.4351	0.0352606	1.03716	0.0254723	>0.05
Q6P3E1	Q6P3E1_RAT	Rps16 protein (Fragment)	Rps16	161									5	23.5337	0.0932961	23.3764	0.0835746	0.896739	0.051351	>0.05
Q6P3V8	Q6P3V8_RAT	Eukaryotic translation initiation factor 4A1 (Eukaryotic translation initiation factor 4A1, isoform CRA_c) (Protein Eif4a1)	Eif4a1 rCG_33100	406									7	24.681	0.10107	24.5903	0.0473081	0.939071	0.0311665	>0.05
Q6P3V9	Q6P3V9_RAT	60S ribosomal protein L4 (RCG58071, isoform CRA_a) (Ribosomal protein L4)	Rpl4 rCG_58071	421									6	22.9133	0.0825714	22.8996	0.0592911	0.990528	0.0414761	>0.05
Q6P4Z9	CSN8_RAT	COP9 signalosome complex subunit 8 (SGN8) (Signalosome subunit 8) (COP9 homolog) (JAB1-containing signalosome subunit 8)	Cops8 Csn8	209	4	24.0932	0.0842788	24.2193	0.051762	1.09135	0.0380334	>0.05	4	22.8618	0.0431539	22.8656	0.065357	1.00264	0.0458668	>0.05
Q6P502	TCPG_RAT	T-complex protein 1 subunit gamma (TCP-1-gamma) (CCT-gamma)	Cct3	545	19	26.8539	0.0612156	26.8506	0.0314509	0.997702	0.0218408	>0.05	19	25.6756	0.0260581	25.6745	0.0236569	0.999214	0.0162762	>0.05
Q6P503	Q6P503_RAT	ATPase, H+ transporting, V1 subunit D, isoform CRA_c (ATPase, H+ transporting, lysosomal V1 subunit D) (Protein Atp6v1d)	Atp6v1d rCG_61537	247	8	26.8912	0.0309661	26.8615	0.0278036	0.97961	0.0189911	>0.05	10	25.9089	0.0529907	25.998	0.0410092	1.06373	0.0314468	>0.05
Q6P6G9	Q6P6G9_RAT	Hnrpa1 protein	Hnrnpa1 Hnrpa1	313	8	24.5666	0.0632793	24.5708	0.0706941	1.00295	0.0508823	>0.05	7	23.0416	0.0379145	23.0303	0.0485369	0.992221	0.0356881	>0.05
Q6P6Q2	K2C5_RAT	Keratin, type II cytoskeletal 5 (Cytokeratin-5) (CK-5) (Keratin-5) (K5) (Type-II keratin Kb5)	Krt5 Krt2-5	576	4	25.9064	0.36276	25.6376	0.352728	0.830019	0.191537	>0.05	6	25.0381	0.327537	24.8454	0.301646	0.874964	0.224141	>0.05
Q6P6R2	DLDH_RAT	Dihydrolipoyl dehydrogenase, mitochondrial (EC 1.8.1.4) (Dihydrolipoamide dehydrogenase)	Dld	509	16	29.3875	0.0661984	29.4057	0.0576143	1.01273	0.0395233	>0.05	14	28.1959	0.0308545	28.2334	0.0234309	1.02633	0.0168747	>0.05
Q6P6T6	Q6P6T6_RAT	Cathepsin D (Cathepsin D, isoform CRA_c)	Ctsd rCG_47835	407	7	25.0893	0.0743171	25.0267	0.102929	0.957557	0.0660521	>0.05	6	24.2827	0.0972258	24.2265	0.112124	0.961841	0.0672204	>0.05
Q6P6U2	Q6P6U2_RAT	26S protease regulatory subunit 6A (Proteasome (Prosome, macropain) 26S subunit, ATPase 3) (Proteasome (Prosome, macropain) 26S subunit, ATPase 3, isoform CRA_a)	Psmc3 rCG_27374	442	7	23.1378	0.106758	23.0286	0.100375	0.927105	0.0736309	>0.05
Q6P6V0	G6PI_RAT	Glucose-6-phosphate isomerase (GPI) (EC 5.3.1.9) (Autocrine motility factor) (AMF) (Neuroleukin) (NLK) (Phosphoglucose isomerase) (PGI) (Phosphohexose isomerase) (PHI)	Gpi	558	28	30.6356	0.0411009	30.6789	0.0345762	1.03048	0.0245499	>0.05	28	29.6989	0.0305149	29.7247	0.0287205	1.01808	0.0203109	>0.05
Q6P747	HP1B3_RAT	Heterochromatin protein 1-binding protein 3	Hp1bp3	553	3	22.646	0.087092	22.5074	0.123445	0.908398	0.0807895	>0.05	4	22.0608	0.115237	21.9178	0.0506871	0.905608	0.0326916	>0.05
Q6P799	SYSC_RAT	Serine--tRNA ligase, cytoplasmic (EC 6.1.1.11) (Seryl-tRNA synthetase) (SerRS) (Seryl-tRNA(Ser/Sec) synthetase)	Sars Sars1	512	9	23.7071	0.0781095	23.6803	0.0482032	0.981583	0.032945	>0.05	7	22.2453	0.0293612	22.2797	0.0468746	1.02414	0.0340884	>0.05
Q6P7B0	SYWC_RAT	Tryptophan--tRNA ligase, cytoplasmic (EC 6.1.1.2) (Tryptophanyl-tRNA synthetase) (TrpRS) [Cleaved into: T1-TrpRS; T2-TrpRS]	Wars	481	7	24.4828	0.0690411	24.5266	0.0550745	1.03077	0.0392286	>0.05	6	23.9865	0.0773566	24.0392	0.0814997	1.03716	0.0530082	>0.05
Q6P7D2	Q6P7D2_RAT	Arginyl aminopeptidase (Aminopeptidase B)	Rnpep	650	7	23.2573	0.0965546	23.32	0.0637649	1.04448	0.0462445	>0.05	3	21.9981	0.225837	22.0475	0.191755	1.03486	0.181924	>0.05
Q6P7Q1	BRE_RAT	BRCA1-A complex subunit BRE (BRCA1/BRCA2-containing complex subunit 45) (Brain and reproductive organ-expressed protein)	Bre	383	2	20.0513	0.216339	19.9496	0.12403	0.931967	0.0850671	>0.05
Q6P7Q2	Q6P7Q2_RAT	Glypican-1 (Gpc1 protein)	Gpc1	558	3	22.4718	0.100494	22.5557	0.0558018	1.0599	0.0438588	>0.05
Q6P7Q4	LGUL_RAT	Lactoylglutathione lyase (EC 4.4.1.5) (Aldoketomutase) (Glyoxalase I) (Glx I) (Ketone-aldehyde mutase) (Methylglyoxalase) (S-D-lactoylglutathione methylglyoxal lyase)	Glo1	184	12	27.0499	0.0858364	26.6118	0.0767816	0.738085	0.040512	<0.001	10	26.4216	0.0741006	26.2694	0.0770921	0.899911	0.0495258	>0.05
Q6P7S6	Q6P7S6_RAT	Clusterin	Clu	447	4	22.9183	0.0564762	23.4737	0.0750139	1.46958	0.0268683	<0.001
Q6P9V1	Q6P9V1_RAT	Tetraspanin	Cd81 rCG_47614	236	4	25.6896	0.0910514	25.6837	0.144123	0.995875	0.120766	>0.05	3	23.573	0.18955	23.4814	0.182852	0.938496	0.125404	>0.05
Q6P9V9	TBA1B_RAT	Tubulin alpha-1B chain (Alpha-tubulin 2) (Tubulin alpha-2 chain)	Tuba1b Tuba2	451	31	34.9938	0.0212038	35.0331	0.0109487	1.02766	0.00791349	>0.05	32	34.0263	0.0187045	34.0111	0.0137972	0.989517	0.0091922	>0.05
Q6PCT3	TPD54_RAT	Tumor protein D54 (Tumor protein D52-like 2)	Tpd52l2	220	3	21.4746	0.201793	21.8289	0.120332	1.27832	0.0919542	>0.05	4	21.887	0.17274	21.9779	0.157913	1.06502	0.108083	>0.05
Q6PCT9	Q6PCT9_RAT	Proteasome (Prosome, macropain) 26S subunit, non-ATPase, 6 (Proteasome (Prosome, macropain) 26S subunit, non-ATPase, 6, isoform CRA_a) (Protein Psmd6)	Psmd6 rCG_42172	389	2	21.6524	0.203037	21.5079	0.196662	0.904665	0.13719	>0.05	3	21.6721	0.0300379	21.6721	0.0476668	0.999945	0.0319785	>0.05
Q6PCU0	Q6PCU0_RAT	ATP synthase subunit gamma	Atp5c1 rCG_55763	298	8	28.9986	0.0571753	28.9386	0.0448021	0.959313	0.029741	>0.05
Q6PCU2	VATE1_RAT	V-type proton ATPase subunit E 1 (V-ATPase subunit E 1) (Vacuolar proton pump subunit E 1)	Atp6v1e1	226									10	27.2399	0.0429729	27.2968	0.0240896	1.04025	0.0176342	>0.05
Q6PCU8	NDUV3_RAT	NADH dehydrogenase [ubiquinone] flavoprotein 3, mitochondrial (Complex I-9kD) (CI-9kD) (NADH-ubiquinone oxidoreductase 9 kDa subunit)	Ndufv3	108	3	25.3339	0.0593014	25.3647	0.0506598	1.02159	0.0339806	>0.05	2	24.2851	0.0765028	24.387	0.0625017	1.07324	0.0448809	>0.05
Q6PDU7	ATP5L_RAT	ATP synthase subunit g, mitochondrial (ATPase subunit g)	Atp5l	103	7	28.9194	0.0721069	29.0304	0.0550712	1.07994	0.0387017	>0.05	7	27.3842	0.0476303	27.4223	0.0412412	1.02677	0.0300796	>0.05
Q6PDV7	RL10_RAT	60S ribosomal protein L10	Rpl10	214									3	21.4701	0.126365	21.3985	0.0993093	0.951587	0.0753384	>0.05
Q6PDW4	Q6PDW4_RAT	Proteasome subunit beta type (EC 3.4.25.1)	Psmb1 rCG_22979	240	2	20.5227	0.15065	20.5404	0.0949981	1.01238	0.0642372	>0.05
Q6PEC0	AP4A_RAT	Bis(5'-nucleosyl)-tetraphosphatase [asymmetrical] (EC 3.6.1.17) (Diadenosine 5',5'''-P1,P4-tetraphosphate asymmetrical hydrolase) (Ap4A hydrolase) (Ap4Aase) (Diadenosine tetraphosphatase) (Nucleoside diphosphate-linked moiety X motif 2) (Nudix motif 2)	Nudt2	147	2	22.0179	0.087586	22.1027	0.0896749	1.06053	0.0618462	>0.05
Q6PEC4	SKP1_RAT	S-phase kinase-associated protein 1 (Cyclin-A/CDK2-associated protein p19) (S-phase kinase-associated protein 1A) (p19A) (p19skp1)	Skp1 Skp1a	163	8	28.7699	0.450656	28.5631	0.470741	0.866449	0.252366	>0.05	7	25.6672	0.0458329	25.6158	0.0537432	0.965011	0.0362016	>0.05
Q6PEC5	Q6PEC5_RAT	Superoxide dismutase [Cu-Zn] (EC 1.15.1.1) (Fragment)	0	163	3	23.9003	0.0628672	24.0684	0.0546751	1.1236	0.0420717	>0.05	6	23.5878	0.0840124	23.5353	0.0457855	0.96425	0.0315938	>0.05
Q6PST4	ATLA1_RAT	Atlastin-1 (EC 3.6.5.-) (Spastic paraplegia 3A homolog)	Atl1 Spg3a	558	12	25.7385	0.0529614	25.68	0.0642885	0.960252	0.0417794	>0.05	13	24.8754	0.0546397	24.88	0.0321556	1.00319	0.0227076	>0.05
Q6PW34	Q6PW34_RAT	Neuronal cell adhesion molecule long isoform Nc17	Nrcam	1299	19	26.4119	0.0401379	26.3327	0.0376487	0.946595	0.0248616	>0.05
Q6PW35	Q6PW35_RAT	Neuronal cell adhesion molecule long isoform Nc7	0	1194									19	24.8112	0.0430831	24.7441	0.0521678	0.954576	0.0364788	>0.05
Q6Q0N1	CNDP2_RAT	Cytosolic non-specific dipeptidase (EC 3.4.13.18) (CNDP dipeptidase 2)	Cndp2	475	11	25.5197	0.0348203	25.4974	0.0461033	0.98467	0.0318708	>0.05	10	24.4451	0.0271712	24.4951	0.0311486	1.0353	0.0230756	>0.05
Q6Q7Y5	GNA13_RAT	Guanine nucleotide-binding protein subunit alpha-13 (G alpha-13) (G-protein subunit alpha-13)	Gna13	377	3	22.8611	0.0396676	22.8831	0.053806	1.01535	0.0369377	>0.05	3	21.7302	0.0527271	21.7529	0.0539877	1.01586	0.0386956	>0.05
Q6QD51	CCD80_RAT	Coiled-coil domain-containing protein 80 (Down-regulated by oncogenes 1 protein) (Steroid-sensitive gene 1 protein) (SSG-1)	Ccdc80 Dro1 Ssg1	949									2	20.8683	0.140542	20.5209	0.0877015	0.786023	0.0503759	>0.05
Q6QI09	Q6QI09_RAT	ATP synthase subunit gamma, mitochondrial (LRRGT00199)	Taf3 Atp5c1 LOC100360100	607									8	27.65	0.0247609	27.7522	0.0334981	1.07341	0.02537	<0.05
Q6QIX3	ZNT3_RAT	Zinc transporter 3 (ZnT-3) (Solute carrier family 30 member 3)	Slc30a3 Znt3	388	3	23.7423	0.0851778	23.7955	0.0851148	1.03757	0.0555818	>0.05	4	22.6833	0.0682612	22.739	0.0664701	1.03936	0.0440685	>0.05
Q6RJR6	RTN3_RAT	Reticulon-3	Rtn3	940	15	27.6655	0.097307	27.5422	0.0776177	0.918073	0.0480959	>0.05	18	26.2419	0.0236472	26.1976	0.01528	0.969753	0.0103359	>0.05
Q6RUV5	RAC1_RAT	Ras-related C3 botulinum toxin substrate 1 (p21-Rac1)	Rac1	192	7	28.8627	0.055954	28.7965	0.0543657	0.955172	0.0356914	>0.05	9	27.7735	0.0317073	27.6913	0.0226854	0.944595	0.015133	<0.05
Q6S3A0	Q6S3A0_RAT	Plectin 6	0	4688	61	27.2735	0.0388052	27.2236	0.0511639	0.966006	0.0353709	>0.05
Q6T393	SPT20_RAT	Spermatogenesis-associated protein 20 (Sperm-specific protein 411) (Ssp411)	Spata20	789									2	19.2334	0.230646	19.4927	0.214797	1.19687	0.191674	>0.05
Q6T487	Q6T487_RAT	Brain-specific alpha actinin 1 isoform	Actn1	914	54	29.8557	0.046571	30.243	0.0858729	1.30794	0.0279908	<0.001	51	28.6296	0.0395298	28.7138	0.043826	1.06011	0.0310114	>0.05
Q6TXE9	Q6TXE9_RAT	LRRGT00050 (Protein Eprs)	Eprs	1486	6	22.8953	0.1225	22.6956	0.0375858	0.870753	0.0225138	>0.05	3	21.102	0.0733492	21.1683	0.0469487	1.04704	0.034254	>0.05
Q6TXF3	Q6TXF3_RAT	Acyl-CoA-binding protein (LRRGT00046)	Dbi LOC679040	600	4	27.3922	0.0669179	27.2428	0.070599	0.901675	0.0451307	>0.05	4	26.6478	0.0905839	26.5615	0.0539756	0.941927	0.0377002	>0.05
Q6UPE1	ETFD_RAT	Electron transfer flavoprotein-ubiquinone oxidoreductase, mitochondrial (ETF-QO) (ETF-ubiquinone oxidoreductase) (EC 1.5.5.1) (Electron-transferring-flavoprotein dehydrogenase) (ETF dehydrogenase)	Etfdh	616	10	24.7081	0.0591183	24.7031	0.0256699	0.996566	0.0179749	>0.05	11	23.7782	0.0282002	23.8413	0.038723	1.04471	0.0273598	>0.05
Q6URK4	ROA3_RAT	Heterogeneous nuclear ribonucleoprotein A3 (hnRNP A3)	Hnrnpa3 Hnrpa3	379	11	26.751	0.0409125	26.7459	0.0354886	0.996473	0.0257947	>0.05	11	25.8815	0.0437615	25.8819	0.0444197	1.00027	0.0311268	>0.05
Q6VBQ5	MYADM_RAT	Myeloid-associated differentiation marker (Myeloid up-regulated protein)	Myadm	318	3	23.2693	0.179011	23.5178	0.0591084	1.188	0.0475293	>0.05	3	19.9733	0.0821273	19.9124	0.0995326	0.958672	0.0649612	>0.05
Q6XD99	Q6XD99_RAT	Non-erythroid spectrin beta	Sptbn1 Spnb2	2358	115	31.2685	0.0191791	31.2681	0.0295273	0.999714	0.0203078	>0.05	117	30.3036	0.0164148	30.3375	0.0156147	1.02376	0.0109405	>0.05
Q6XDA0	Q6XDA0_RAT	Erythroid spectrin beta (Protein Sptb)	Sptb LOC314251	2137	9	25.9411	0.077917	25.7842	0.0662369	0.896976	0.0410717	>0.05
Q6XVN8	MLP3A_RAT	Microtubule-associated proteins 1A/1B light chain 3A (Autophagy-related protein LC3 A) (Autophagy-related ubiquitin-like modifier LC3 A) (MAP1 light chain 3-like protein 1) (MAP1A/MAP1B light chain 3 A) (MAP1A/MAP1B LC3 A) (Microtubule-associated protein 1 light chain 3 alpha)	Map1lc3a	121	3	25.6869	0.16254	25.5014	0.104976	0.879329	0.0767761	>0.05
Q711G3	IAH1_RAT	Isoamyl acetate-hydrolyzing esterase 1 homolog (EC 3.1.-.-) (Hypertrophic agonist-responsive protein B64)	Iah1 Harpb64	249	4	21.9473	0.0690709	22.0131	0.0635744	1.04667	0.0485467	>0.05
Q71UE8	NEDD8_RAT	NEDD8 (Neddylin) (Ubiquitin-like protein NEDD8)	Nedd8	81									2	23.5826	0.0771844	23.5939	0.081545	1.00785	0.0638405	>0.05
Q71UF4	RBBP7_RAT	Histone-binding protein RBBP7 (Nucleosome-remodeling factor subunit RBAP46) (Retinoblastoma-binding protein 7) (RBBP-7)	Rbbp7	425	2	22.243	0.0908108	22.155	0.0640178	0.940838	0.0415495	>0.05
Q75Q39	TOM70_RAT	Mitochondrial import receptor subunit TOM70 (Mitochondrial precursor proteins import receptor) (Translocase of outer membrane 70 kDa subunit)	Tomm70a	610	25	28.6161	0.0881667	29.0255	0.0990309	1.32815	0.052128	<0.001	23	27.5209	0.0807391	27.7153	0.0732376	1.14429	0.0574324	>0.05
Q75Q41	TOM22_RAT	Mitochondrial import receptor subunit TOM22 homolog (rTOM22) (Translocase of outer membrane 22 kDa subunit homolog)	Tomm22 Tom22	142	4	24.0474	0.06278	24.0343	0.0582468	0.991004	0.0411002	>0.05	4	22.6054	0.0390907	22.6605	0.0591746	1.03892	0.0423648	>0.05
Q76EQ0	SRR_RAT	Serine racemase (EC 4.3.1.17) (EC 4.3.1.18) (EC 5.1.1.18) (D-serine ammonia-lyase) (D-serine dehydratase) (L-serine ammonia-lyase) (L-serine dehydratase)	Srr	333	4	23.0154	0.0327785	22.9929	0.0668044	0.984547	0.0456636	>0.05	4	21.7918	0.103031	21.7983	0.0911989	1.00456	0.0666299	>0.05
Q76GL9	Q76GL9_RAT	Amino acid transporter	Slc1a4 ASCT1 rCG_23218	529	2	23.1437	0.0640065	23.0306	0.106487	0.924601	0.0651711	>0.05	2	21.9481	0.0566521	21.913	0.0529561	0.975992	0.0353996	>0.05
Q78P75	DYL2_RAT	Dynein light chain 2, cytoplasmic (Dynein light chain LC8-type 2)	Dynll2 Dlc2	89	5	27.4136	0.184838	27.6616	0.146432	1.18763	0.11865	>0.05	5	26.7074	0.0581585	26.6627	0.0440369	0.9695	0.0307697	>0.05
Q78PB6	NDEL1_RAT	Nuclear distribution protein nudE-like 1 (Protein Nudel)	Ndel1 Nude2 Nudel	345	2	22.1394	0.0438979	22.2352	0.0565575	1.06863	0.0436756	>0.05
Q792H5	CELF2_RAT	CUGBP Elav-like family member 2 (CELF-2) (Bruno-like protein 3) (CUG triplet repeat RNA-binding protein 2) (CUG-BP2) (CUG-BP- and ETR-3-like factor 2) (ELAV-type RNA-binding protein 3) (ETR-3) (Protein ETR-R3) (Neuroblastoma apoptosis-related RNA-binding protein) (rNapor) (RNA-binding protein BRUNOL-3)	Celf2 Cugbp2 Etr3 Napor	508									3	21.6259	0.0775578	21.6131	0.067902	0.991118	0.0466314	>0.05
Q792I0	LIN7C_RAT	Protein lin-7 homolog C (Lin-7C) (Mammalian lin-seven protein 3) (MALS-3) (Vertebrate lin-7 homolog 3) (Veli-3)	Lin7c Mals3 Veli3	197									5	23.8482	0.135718	23.8065	0.125126	0.971517	0.0819951	>0.05
Q794E4	HNRPF_RAT	Heterogeneous nuclear ribonucleoprotein F (hnRNP F) [Cleaved into: Heterogeneous nuclear ribonucleoprotein F, N-terminally processed]	Hnrnpf Hnrpf	415									4	24.5399	0.0425947	24.5962	0.0318616	1.0398	0.0225954	>0.05
Q794F9	4F2_RAT	4F2 cell-surface antigen heavy chain (4F2hc) (Solute carrier family 3 member 2) (CD antigen CD98)	Slc3a2	527	15	26.7804	0.0416005	26.8108	0.0443796	1.02129	0.033106	>0.05	13	25.3181	0.0437047	25.3387	0.0429053	1.01438	0.0310591	>0.05
Q7M0E3	DEST_RAT	Destrin (Actin-depolymerizing factor) (ADF)	Dstn	165	7	26.8005	0.0864388	26.7168	0.0726129	0.943619	0.0449263	>0.05	8	25.1176	0.0338451	25.0938	0.0257888	0.98361	0.0174622	>0.05
Q7M767	UB2V2_RAT	Ubiquitin-conjugating enzyme E2 variant 2 (Ubiquitin-conjugating enzyme variant MMS2)	Ube2v2 Mms2 Uev2	145	4	25.1797	0.190321	25.0321	0.178471	0.902792	0.117228	>0.05	5	23.9415	0.212383	23.6973	0.193456	0.84424	0.119754	>0.05
Q7TMC7	Q7TMC7_RAT	Ab2-417 (Cc1-8) (Signal recognition particle receptor subunit beta)	Tf Srprb	979	17	25.995	0.0915186	25.8776	0.0720789	0.921836	0.0476206	>0.05	17	24.8716	0.124344	24.8829	0.089604	1.00786	0.0649889	>0.05
Q7TP11	Q7TP11_RAT	6-phosphogluconate dehydrogenase, decarboxylating (EC 1.1.1.44)	Pgd	1089	6	24.9712	0.0957259	25.1525	0.0516657	1.13386	0.0402201	>0.05	7	24.1645	0.0537343	24.2318	0.0395048	1.04777	0.0298499	>0.05
Q7TP27	Q7TP27_RAT	Ba1-651	Tas1r2	1465	5	23.171	0.086223	23.2815	0.103809	1.07962	0.0774728	>0.05	3	21.1261	0.06555	21.2349	0.0529075	1.07827	0.0397327	>0.05
Q7TP47	HNRPQ_RAT	Heterogeneous nuclear ribonucleoprotein Q (hnRNP Q) (Liver regeneration-related protein LRRG077) (Synaptotagmin-binding, cytoplasmic RNA-interacting protein)	Syncrip Hnrpq Ab2-339	533	7	23.1624	0.190027	23.0306	0.19254	0.912702	0.124284	>0.05
Q7TP61	Q7TP61_RAT	Ab2-076	Acat2 Acat3	963	5	25.7332	0.0815204	25.5796	0.0935299	0.898967	0.0569737	>0.05	5	23.9204	0.0681648	23.9497	0.0707468	1.0205	0.0510914	>0.05
Q7TP75	Q7TP75_RAT	Aa2-066	Ahsg	553	3	24.3717	0.162088	24.8416	0.0645066	1.385	0.0370384	<0.01	4	23.0189	0.158764	22.3405	0.22047	0.624868	0.0632691	<0.01
[truncated: 198 more rows]
